# Supplementary material for: Assessing the use of a micro-sampling device for measuring blood protein levels in healthy subjects and COVID-19 patients
Source: PubMed Central journal article supplement (PMC9365123; doi:10.1371/journal.pone.0272572), 2022-08-10

**CD163**  
**TAMC healthy controls [supervised in-clinic collection]**  
**Matched samples - all time points [n=152]**

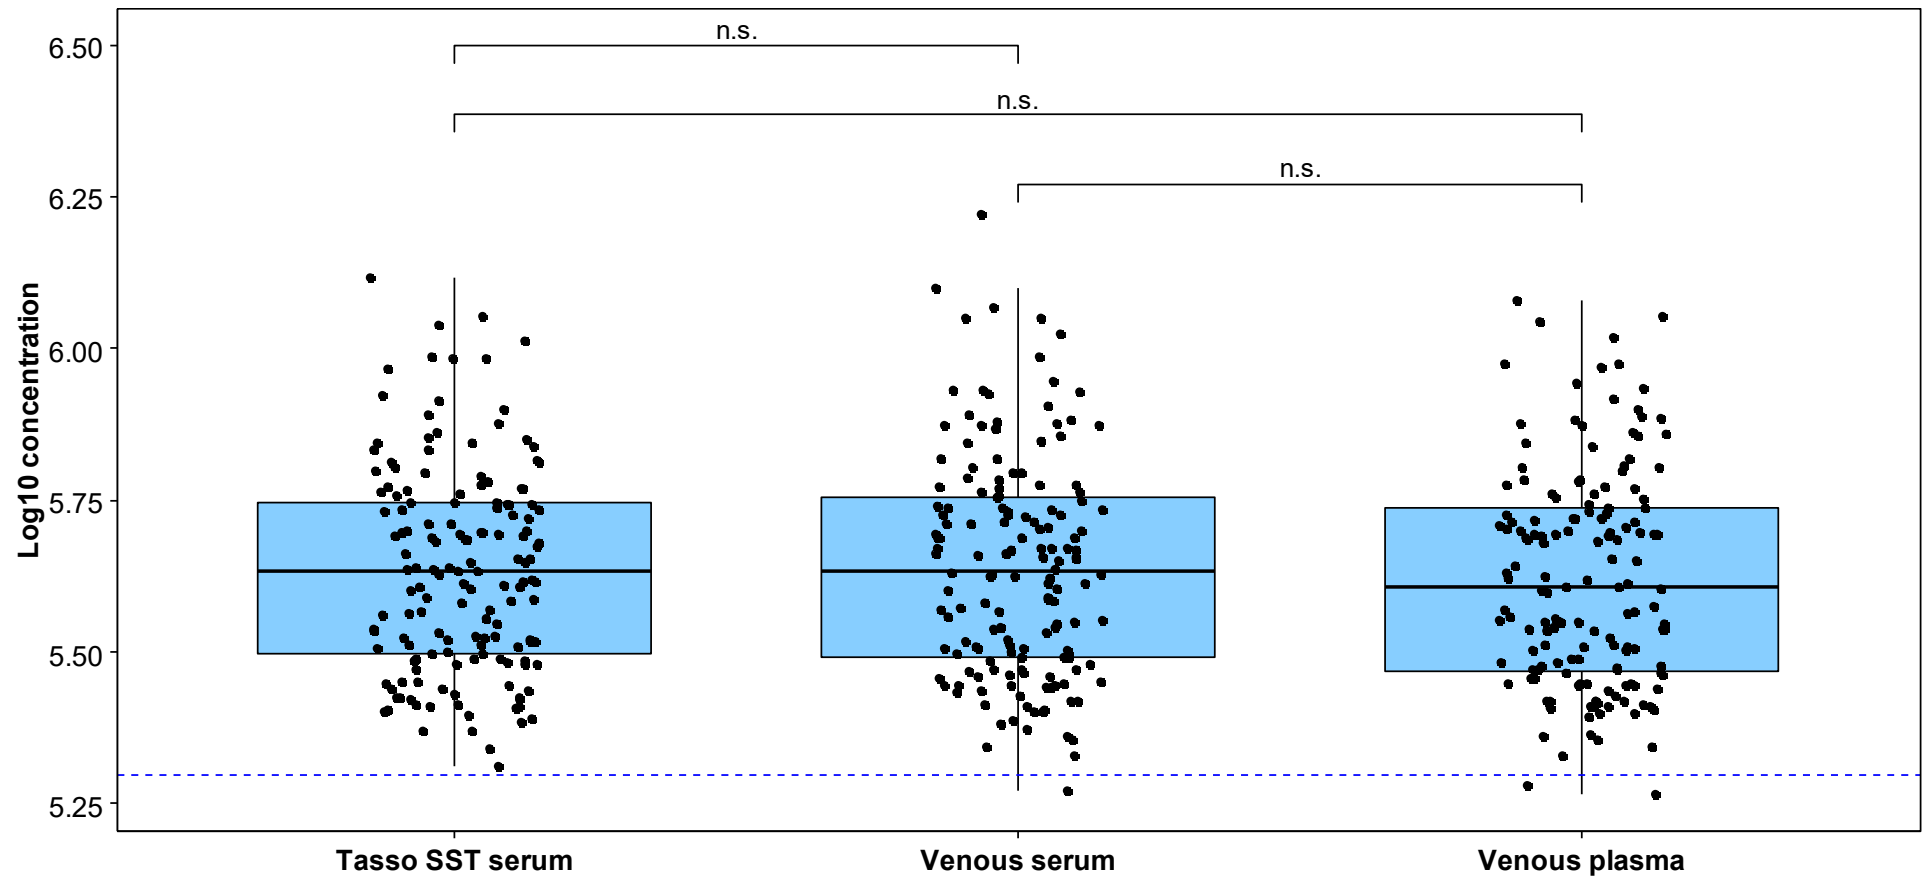

**CRP**  
**TAMC healthy controls [supervised in-clinic collection]**  
**Matched samples - all time points [n=183]**

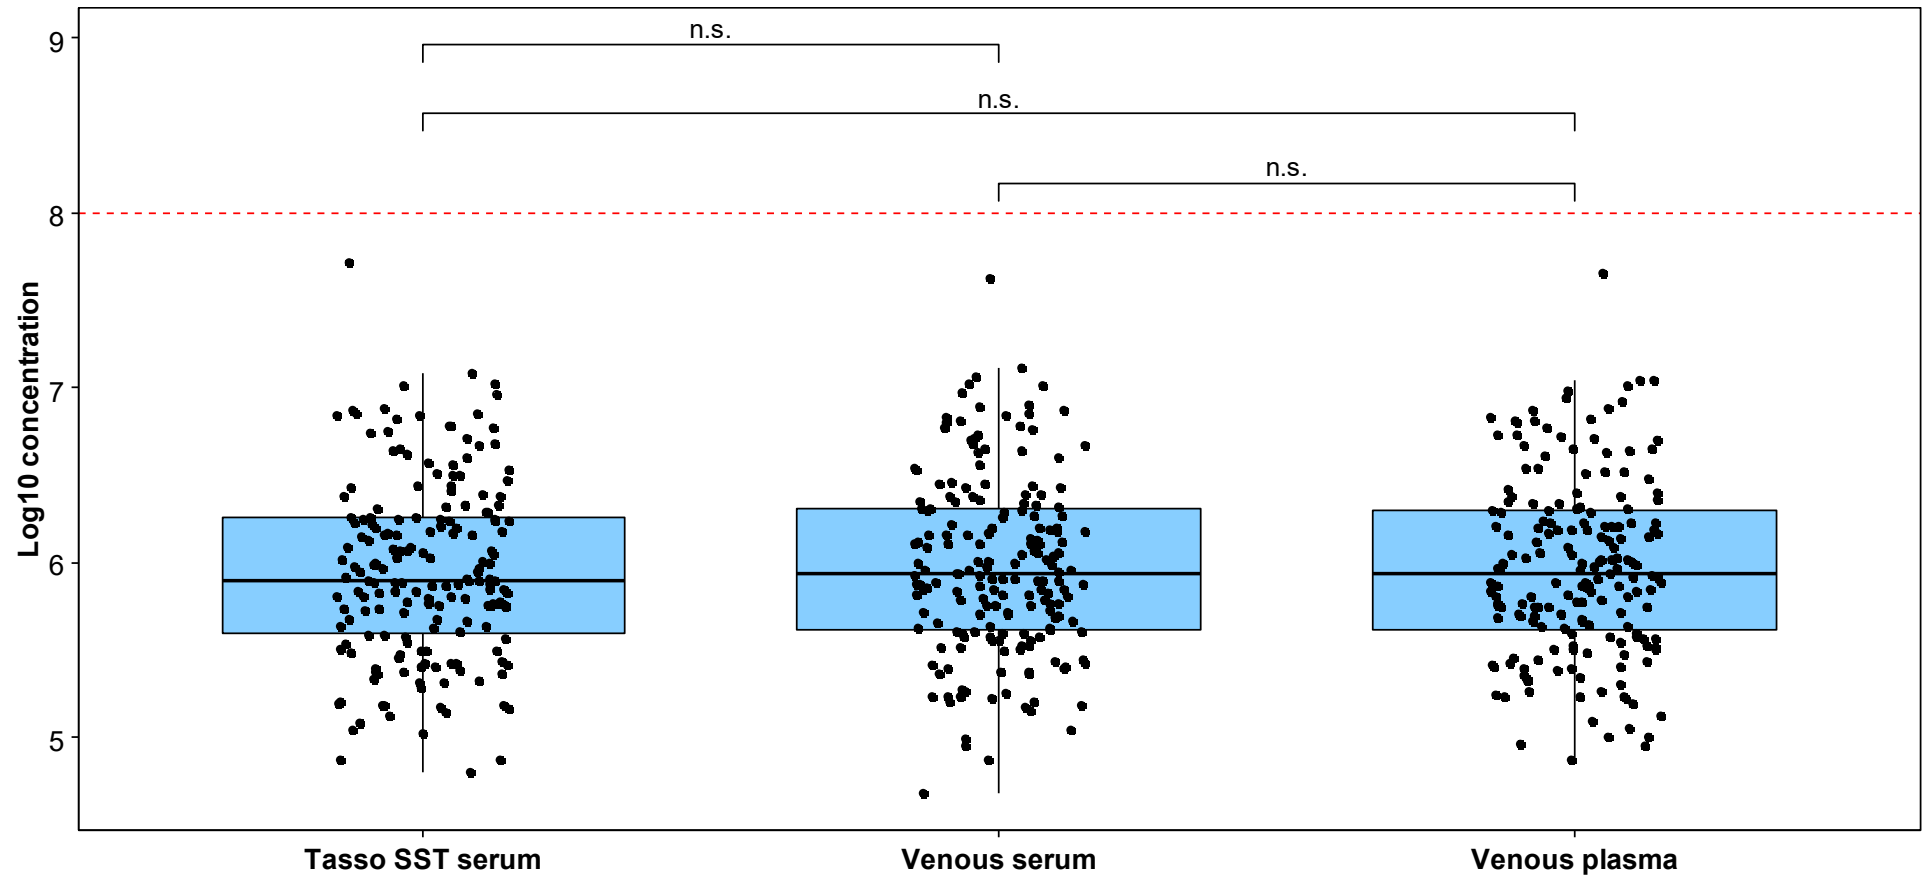

**CXCL10**  
**TAMC healthy controls [supervised in-clinic collection]**  
**Matched samples - all time points [n=152]**

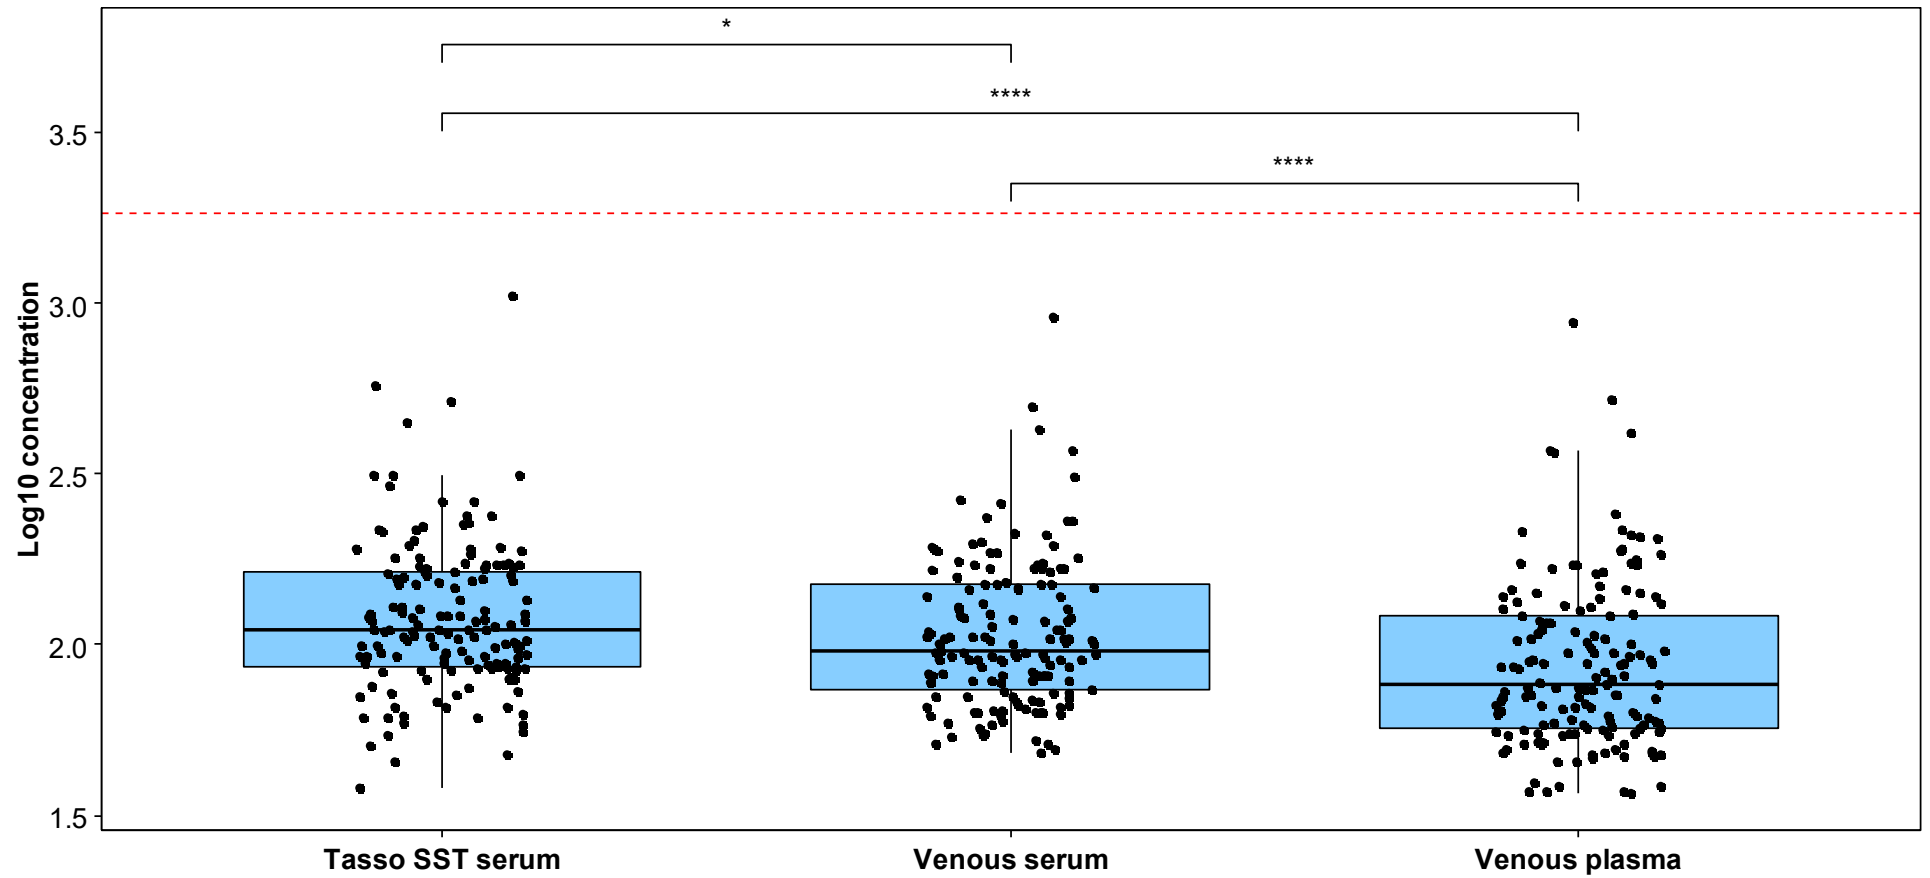

D-dimer  
TAMC healthy controls [supervised in-clinic collection]  
Matched samples - all time points [n=183]

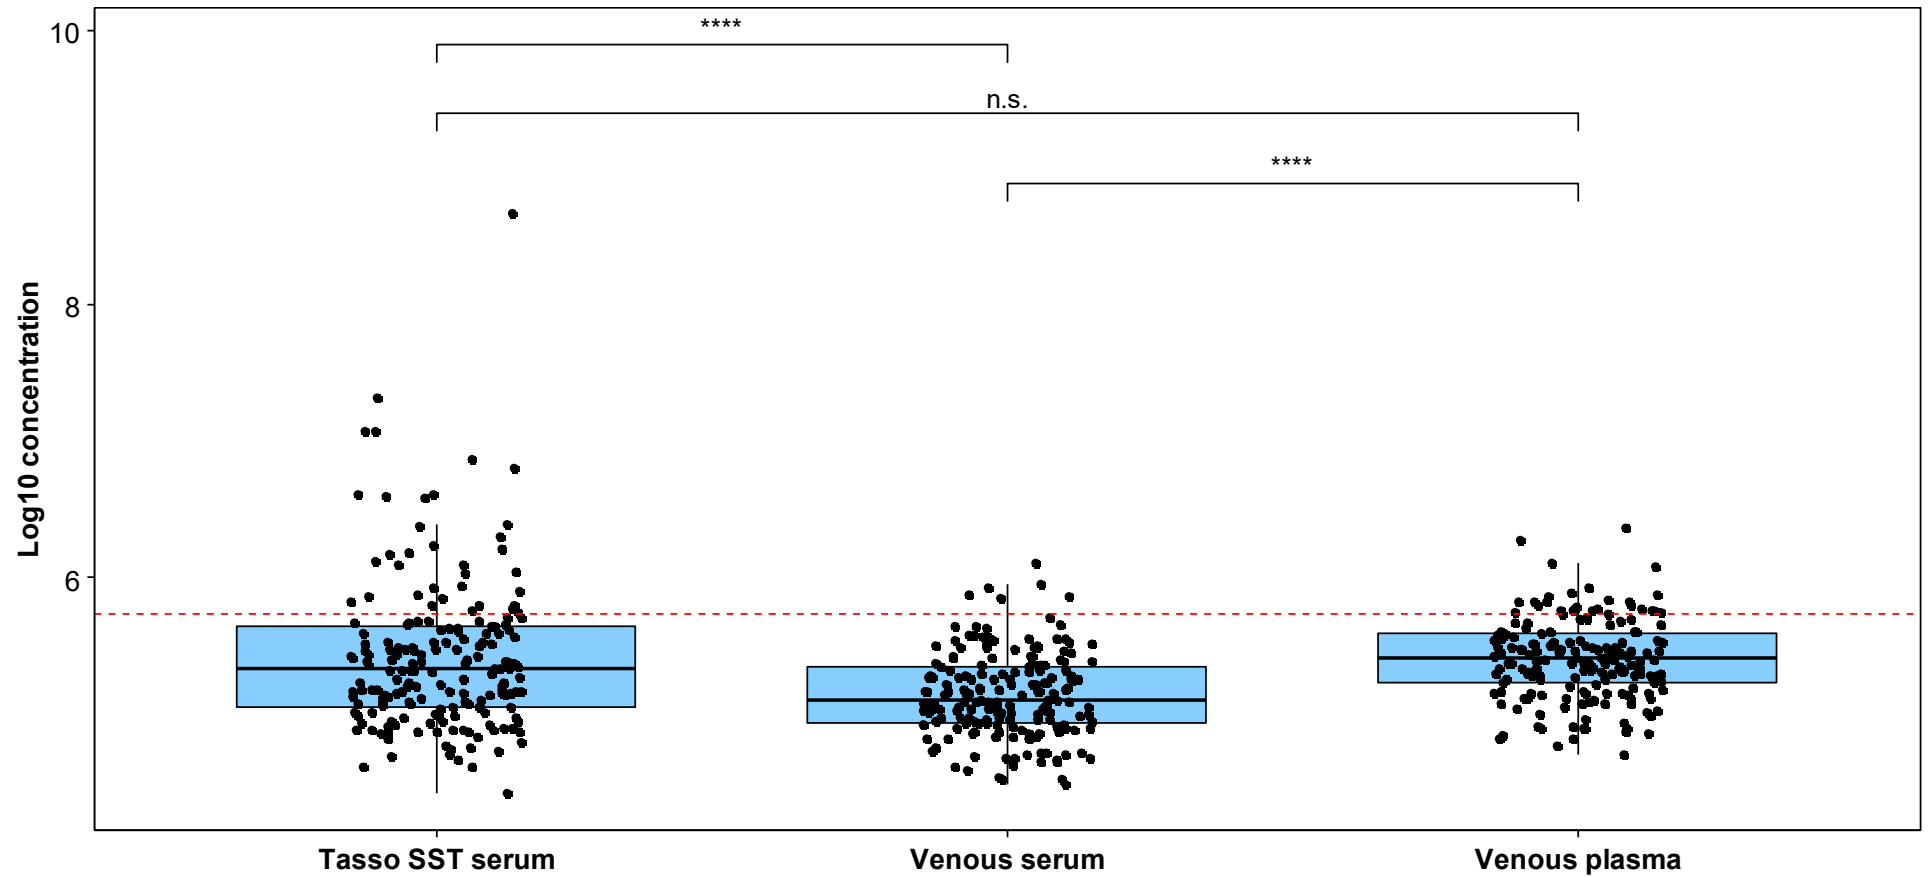

**Ferritin**  
**TAMC healthy controls [supervised in-clinic collection]**  
**Matched samples - all time points [n=183]**

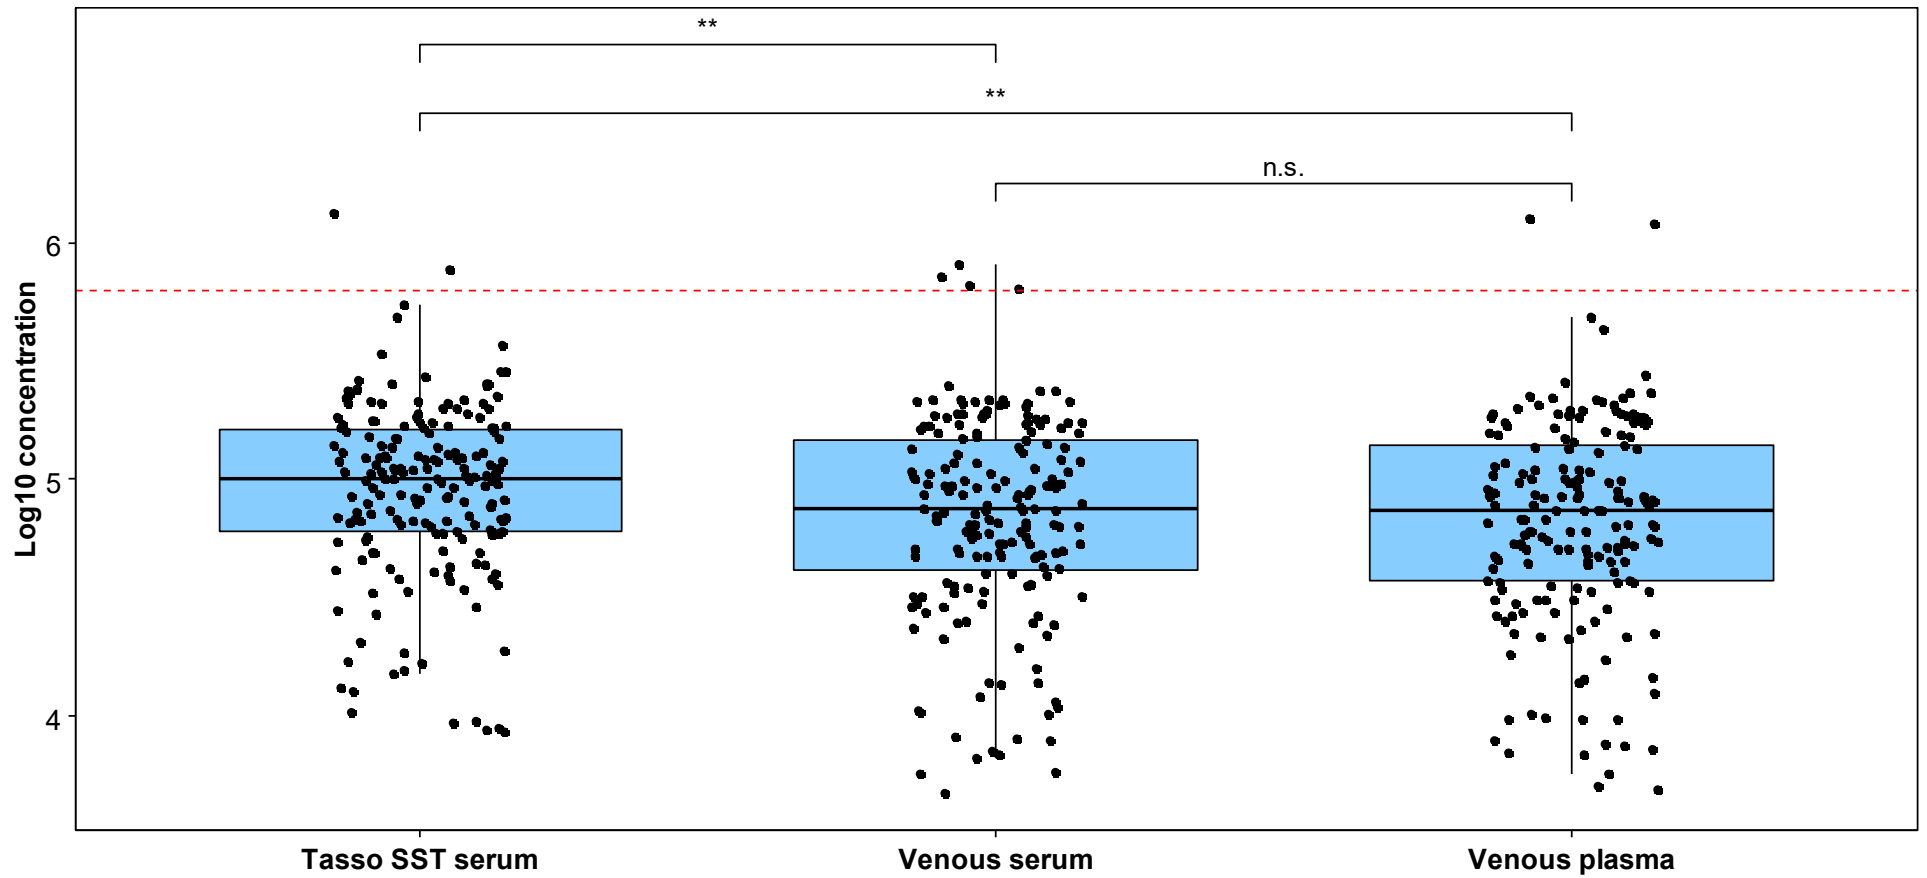

**ICAM-1**  
**TAMC healthy controls [supervised in-clinic collection]**  
**Matched samples - all time points [n=183]**

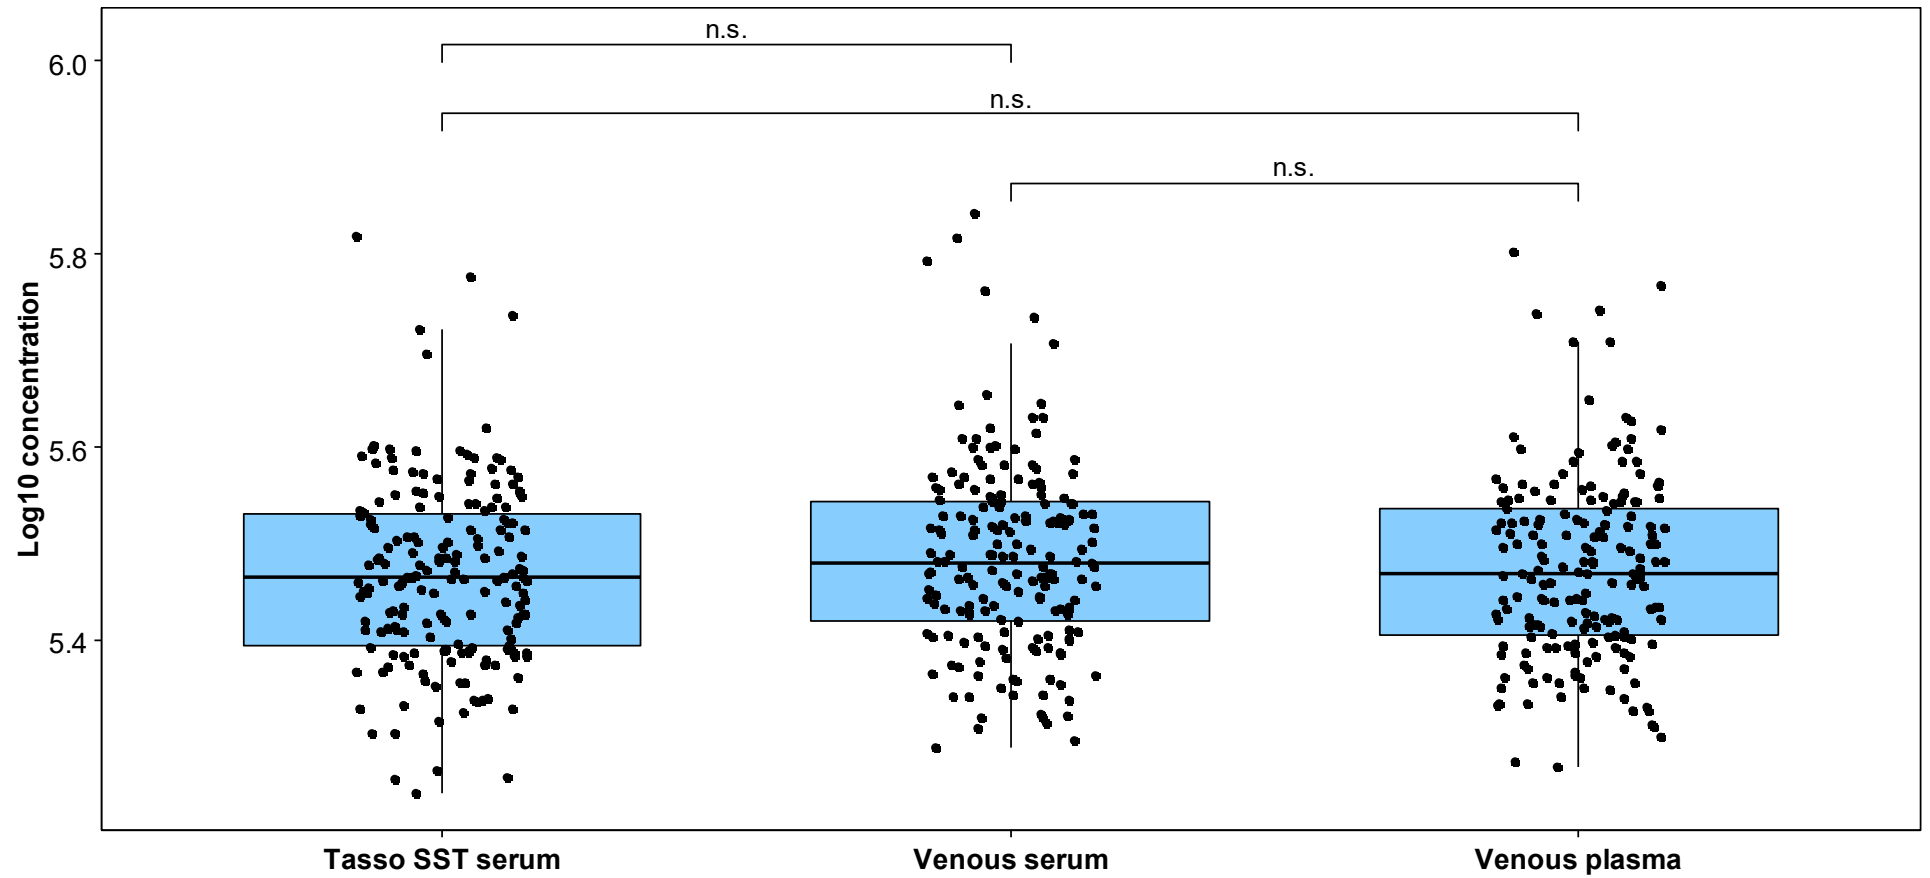

**IL-1B**  
**TAMC healthy controls [supervised in-clinic collection]**  
**Matched samples - all time points [n=183]**

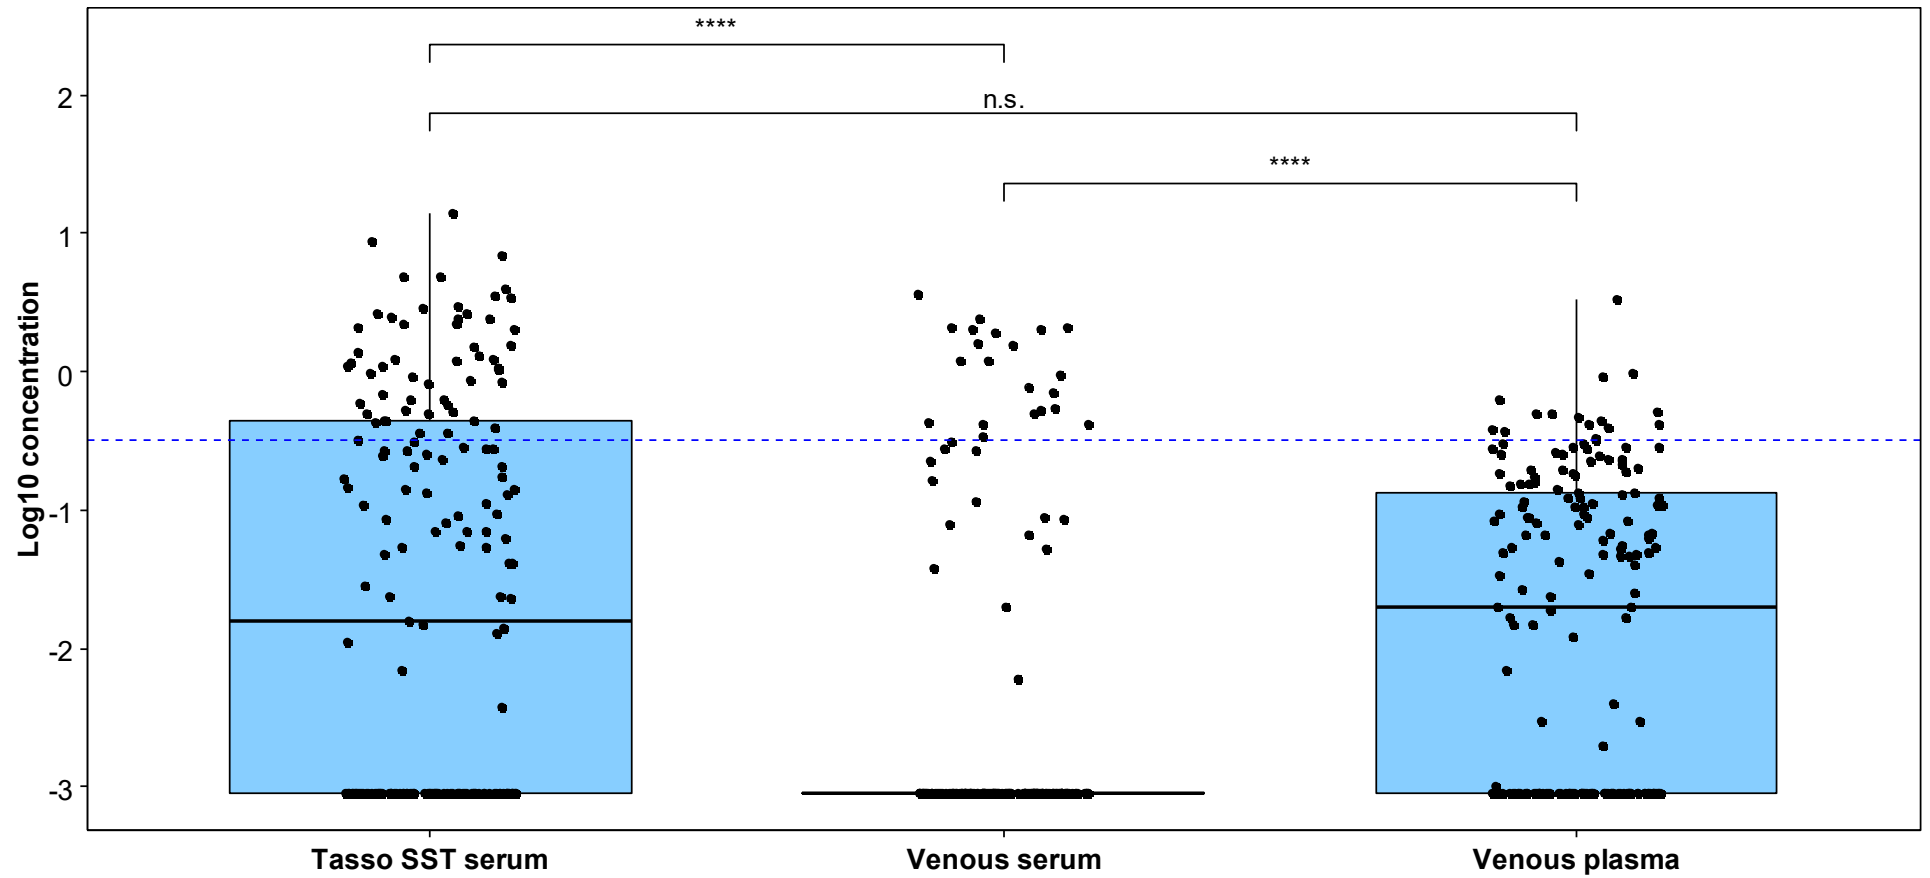

**IL-1Ra**  
**TAMC healthy controls [supervised in-clinic collection]**  
**Matched samples - all time points [n=183]**

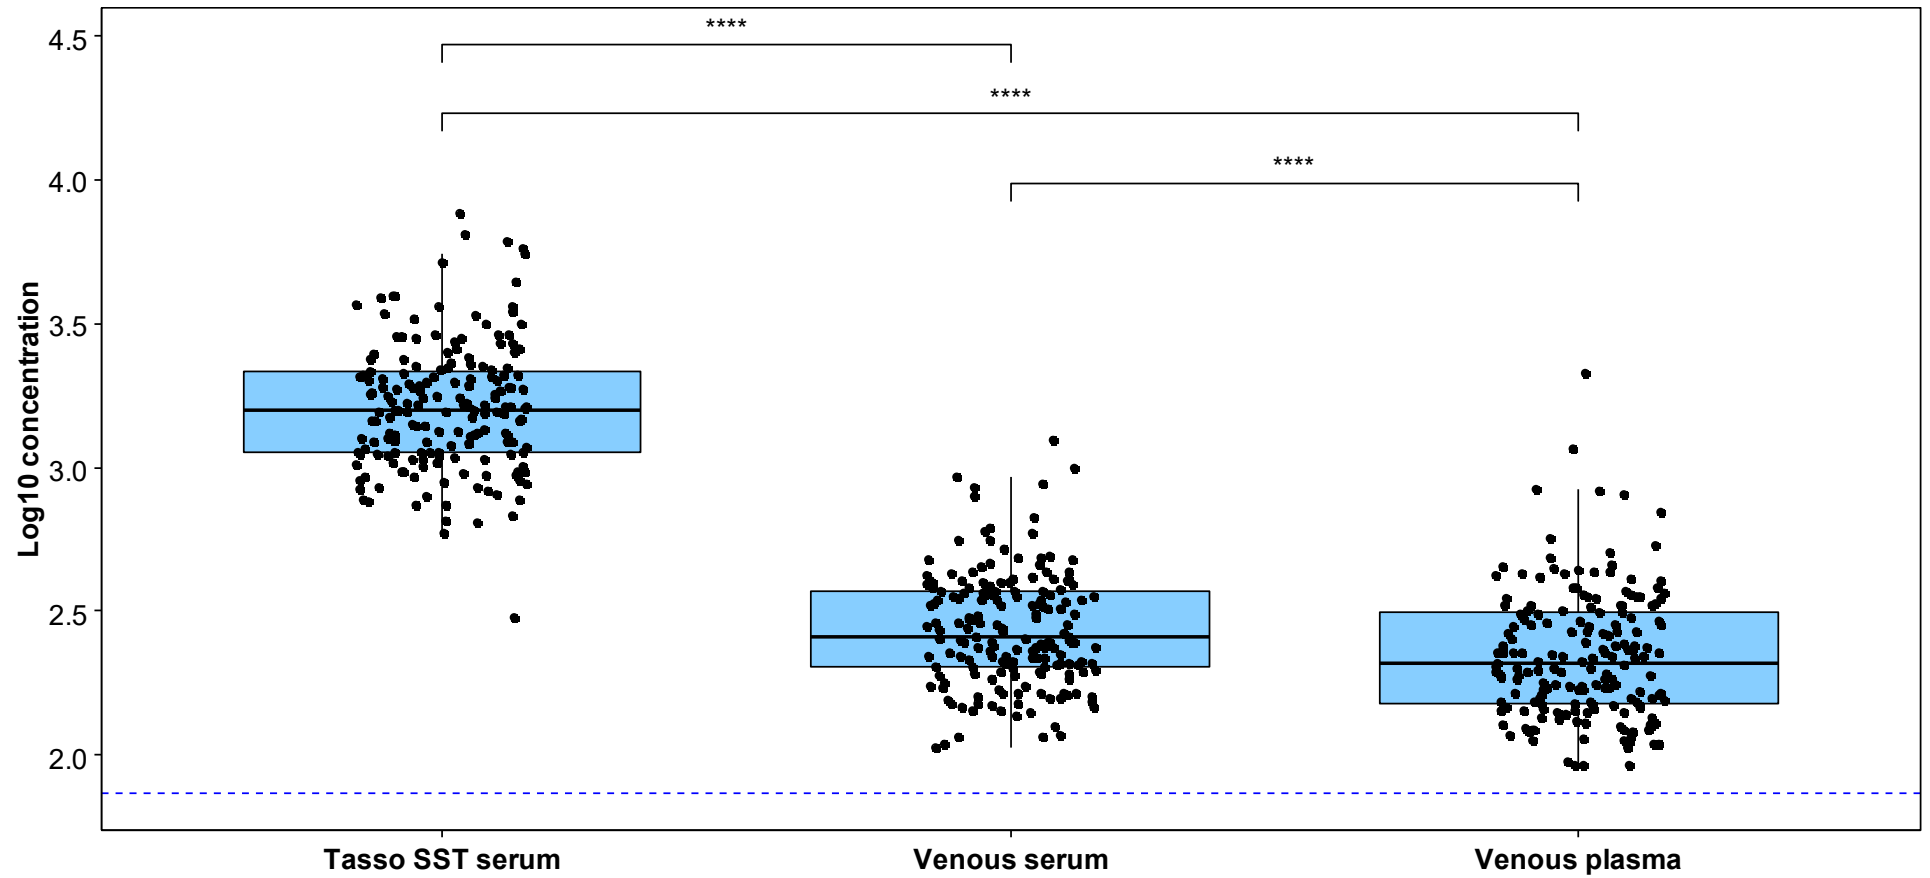



**IL-5**  
**TAMC healthy controls [supervised in-clinic collection]**  
**Matched samples - all time points [n=183]**

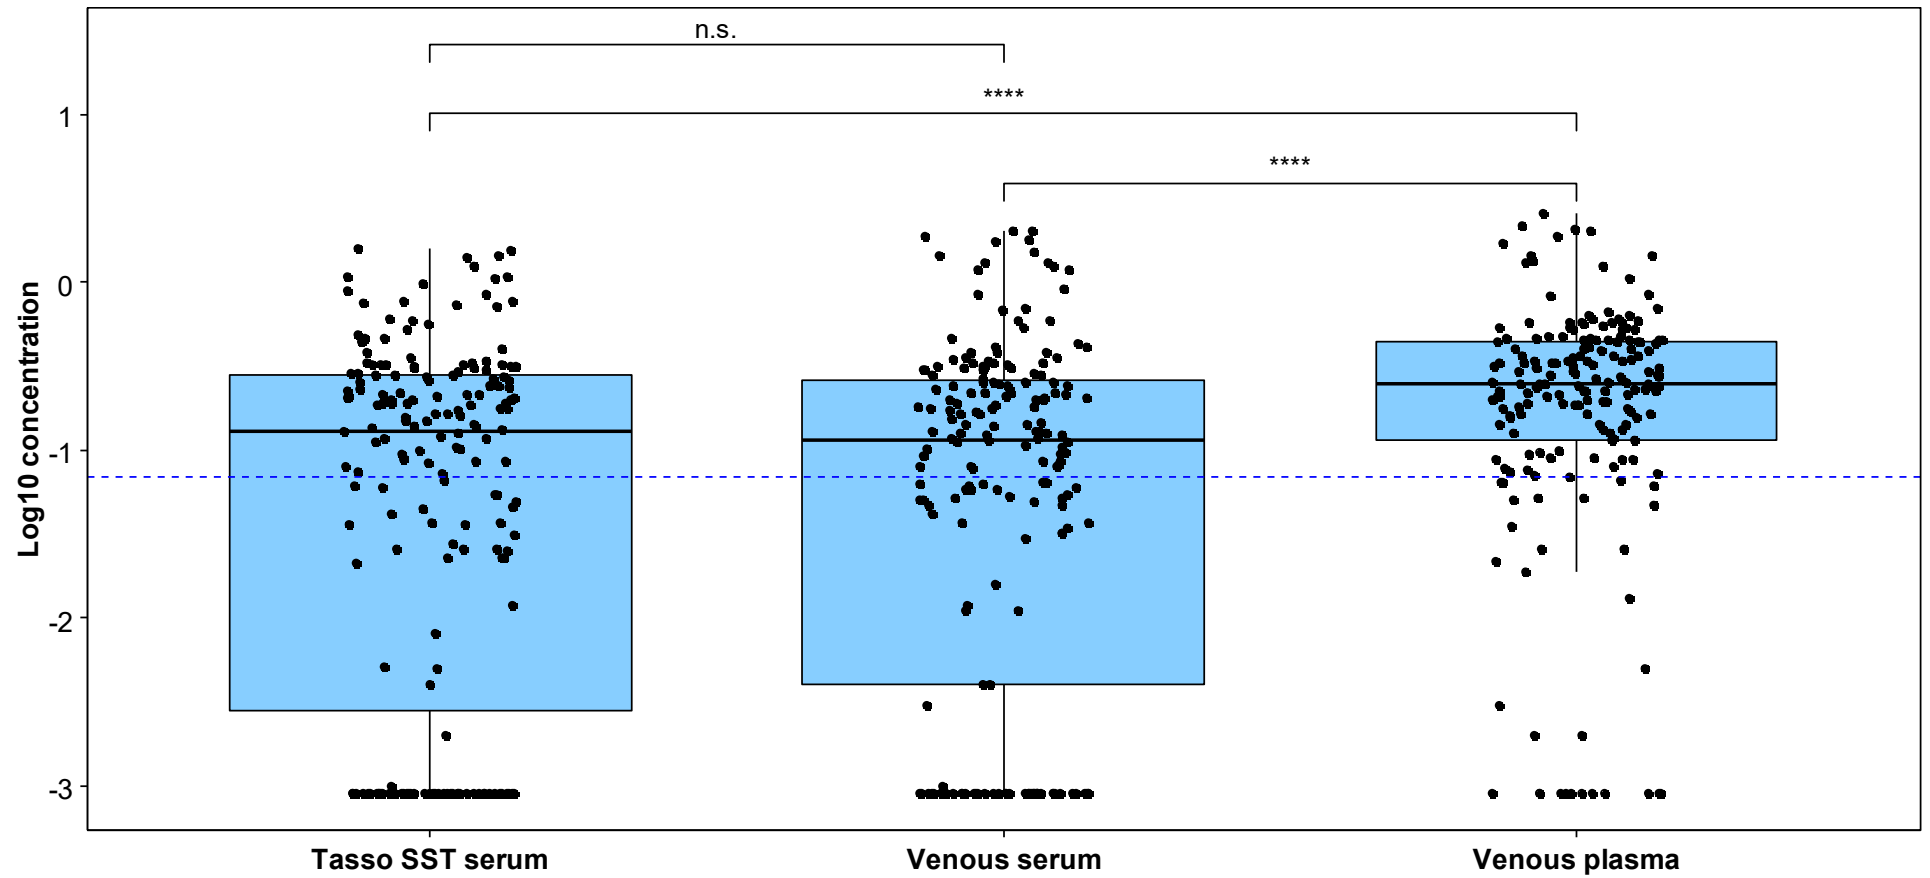

**IL-6**  
**TAMC healthy controls [supervised in-clinic collection]**  
**Matched samples - all time points [n=183]**

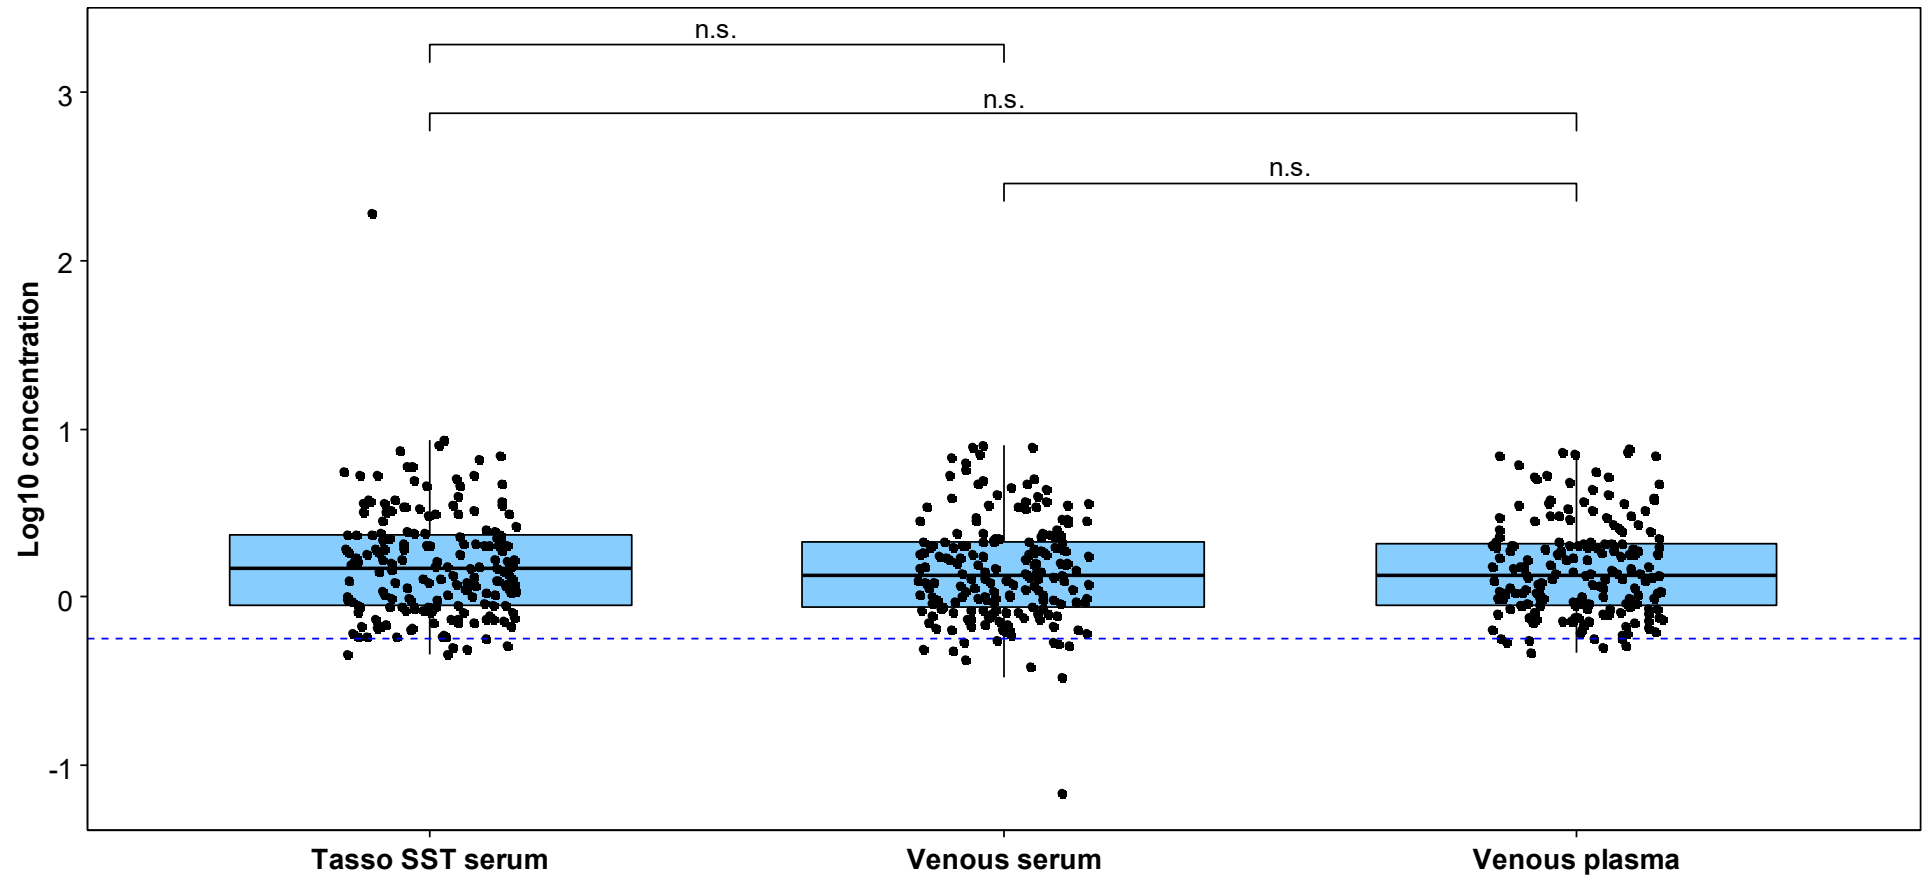

**IL-6Ra**  
**TAMC healthy controls [supervised in-clinic collection]**  
**Matched samples - all time points [n=183]**

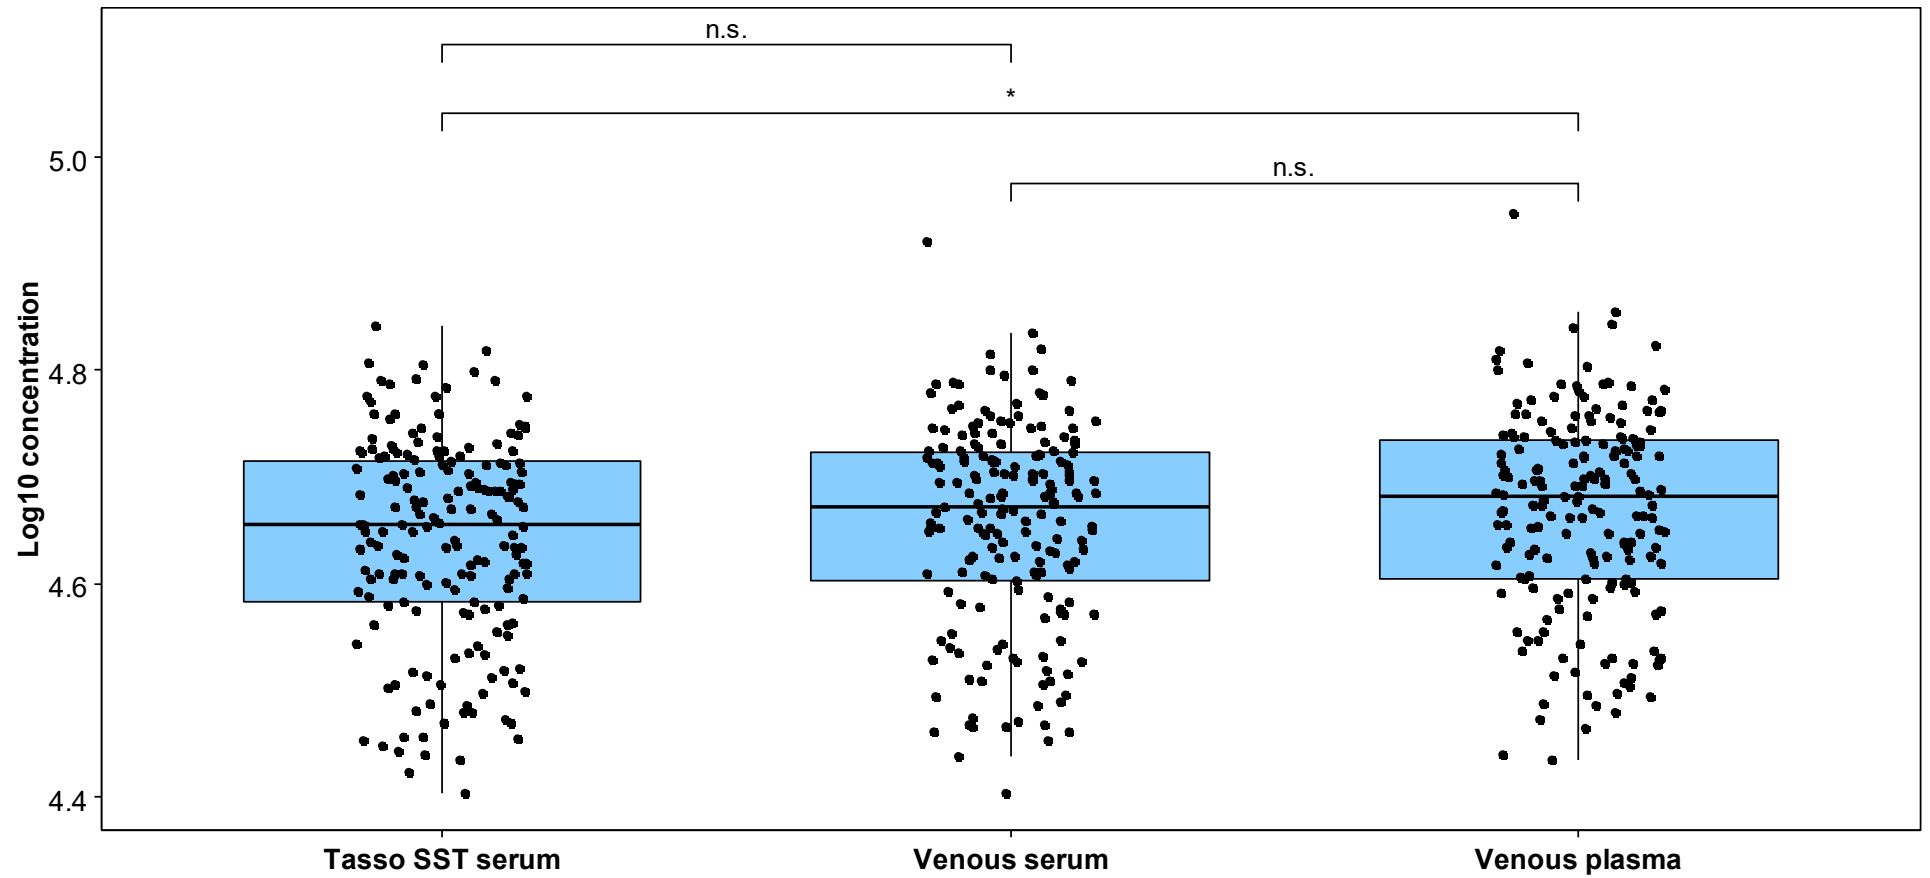

**IL-18BP<sub>a</sub>**  
**TAMC healthy controls [supervised in-clinic collection]**  
**Matched samples - all time points [n=183]**

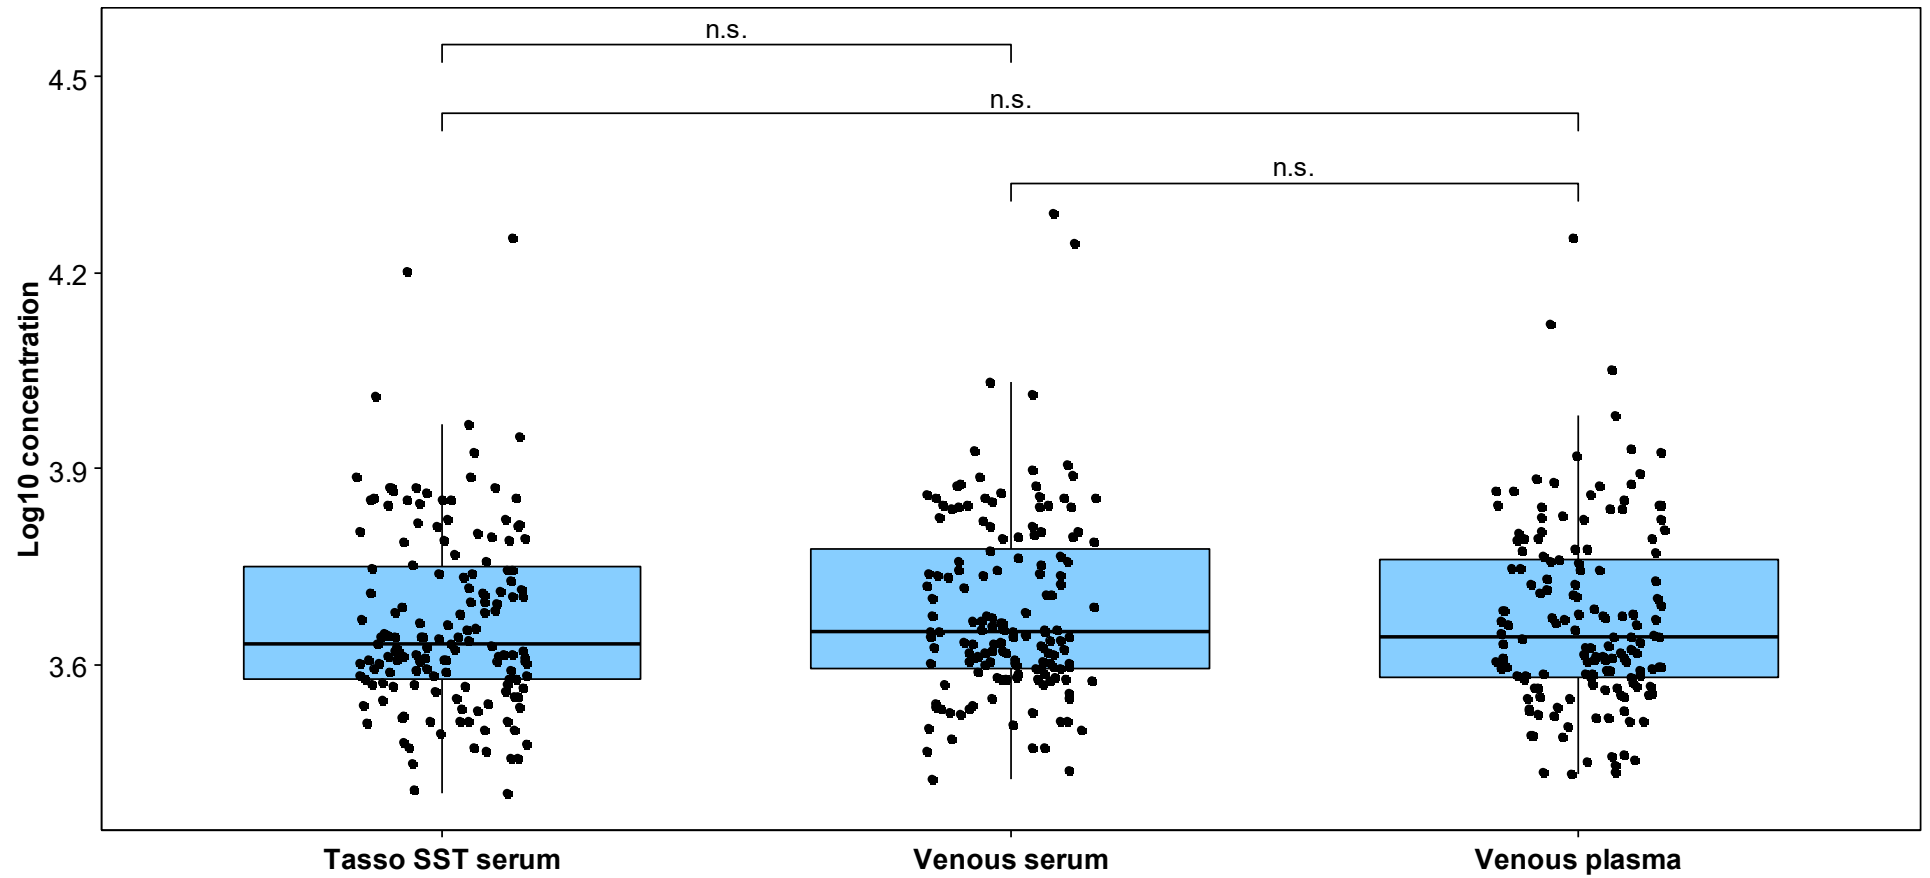

**LCN**  
**TAMC healthy controls [supervised in-clinic collection]**  
**Matched samples - all time points [n=183]**

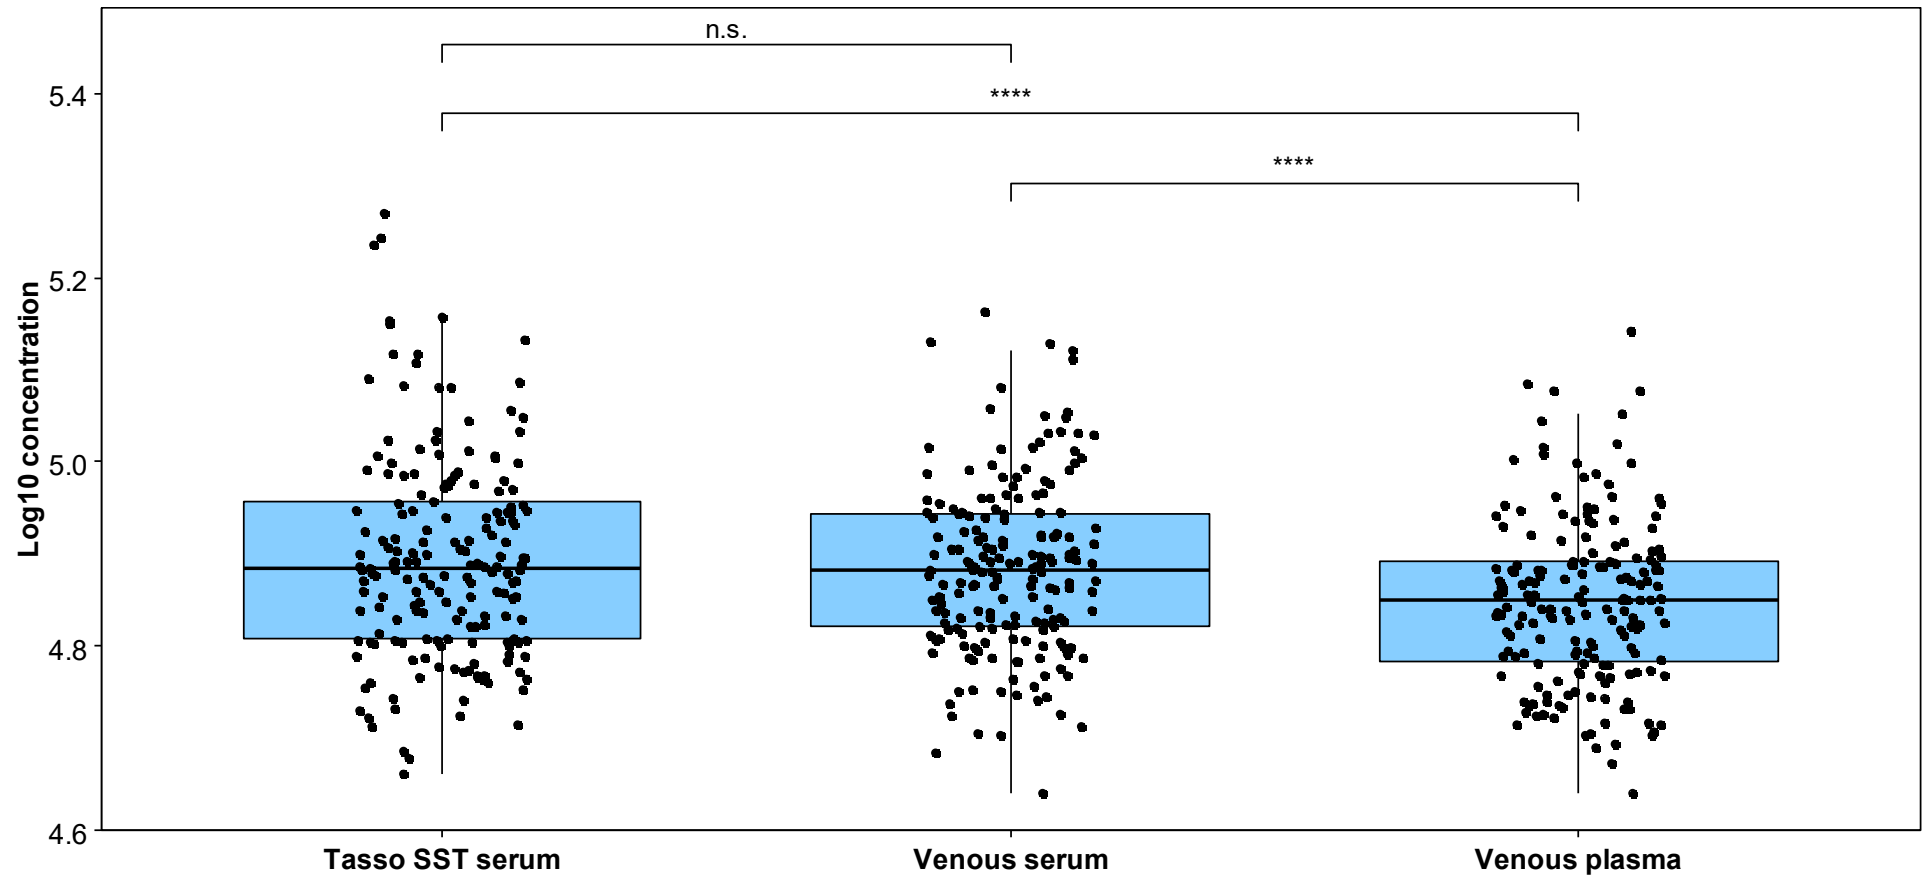

**PCT**  
**TAMC healthy controls [supervised in-clinic collection]**  
**Matched samples - all time points [n=183]**



**RAGE**  
**TAMC healthy controls [supervised in-clinic collection]**  
**Matched samples - all time points [n=183]**

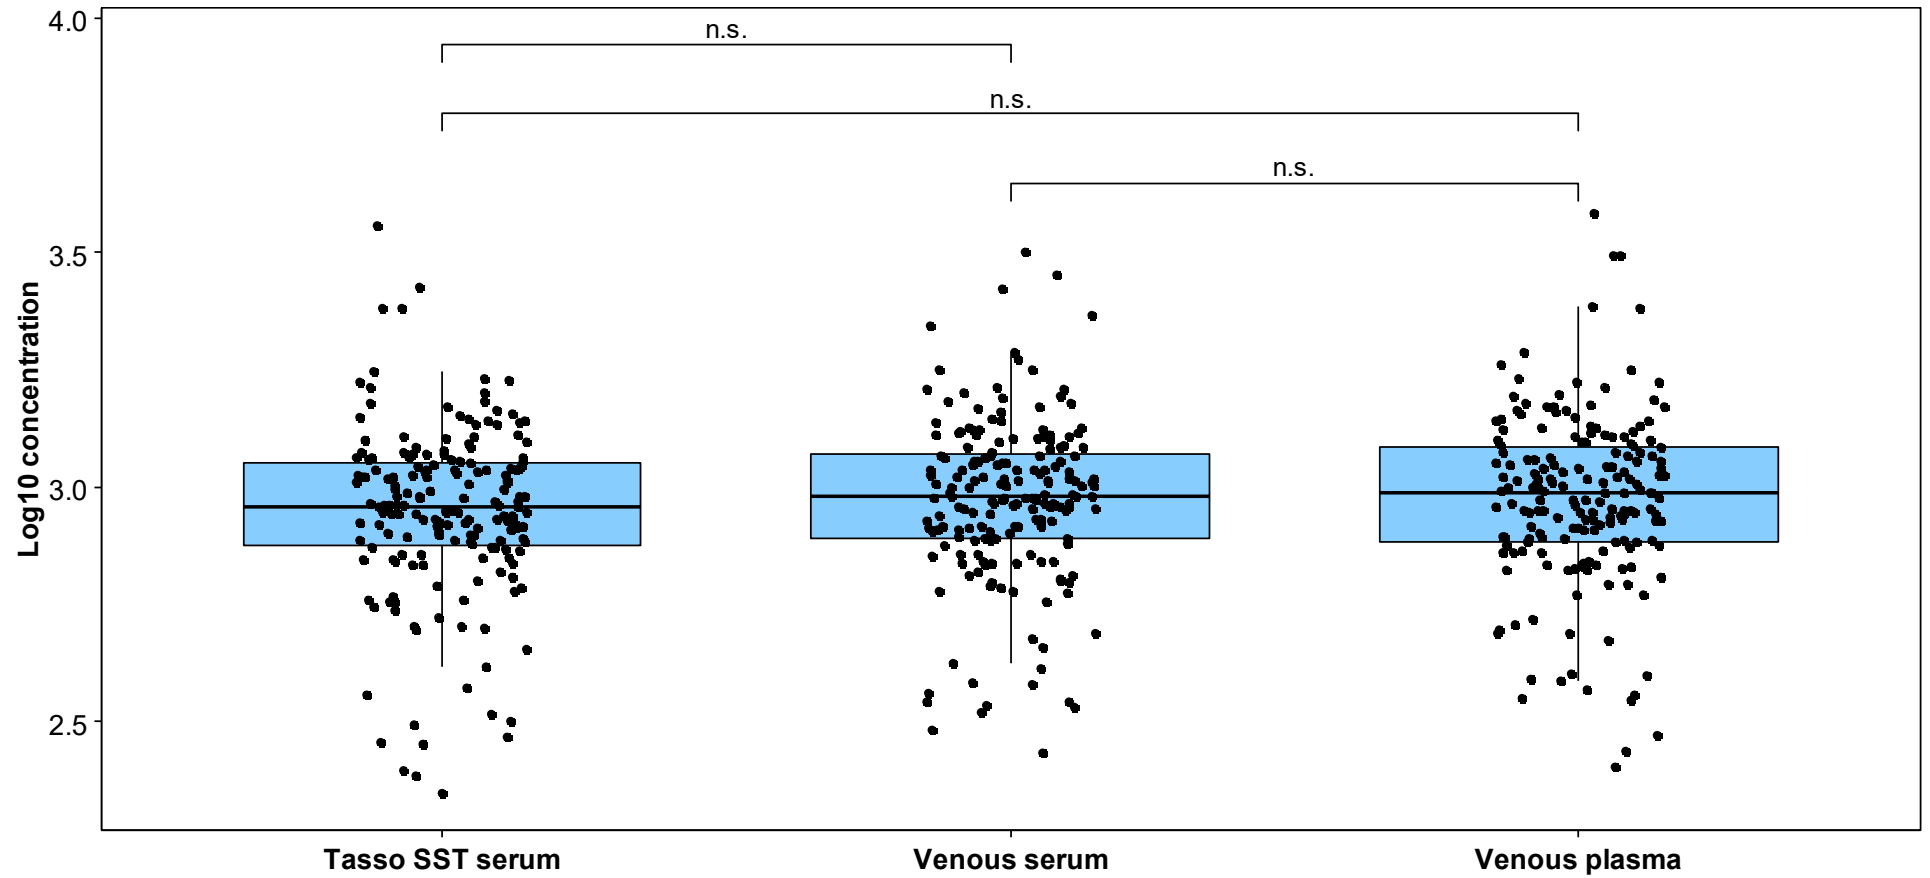

**TNF-R1**  
**TAMC healthy controls [supervised in-clinic collection]**  
**Matched samples - all time points [n=183]**

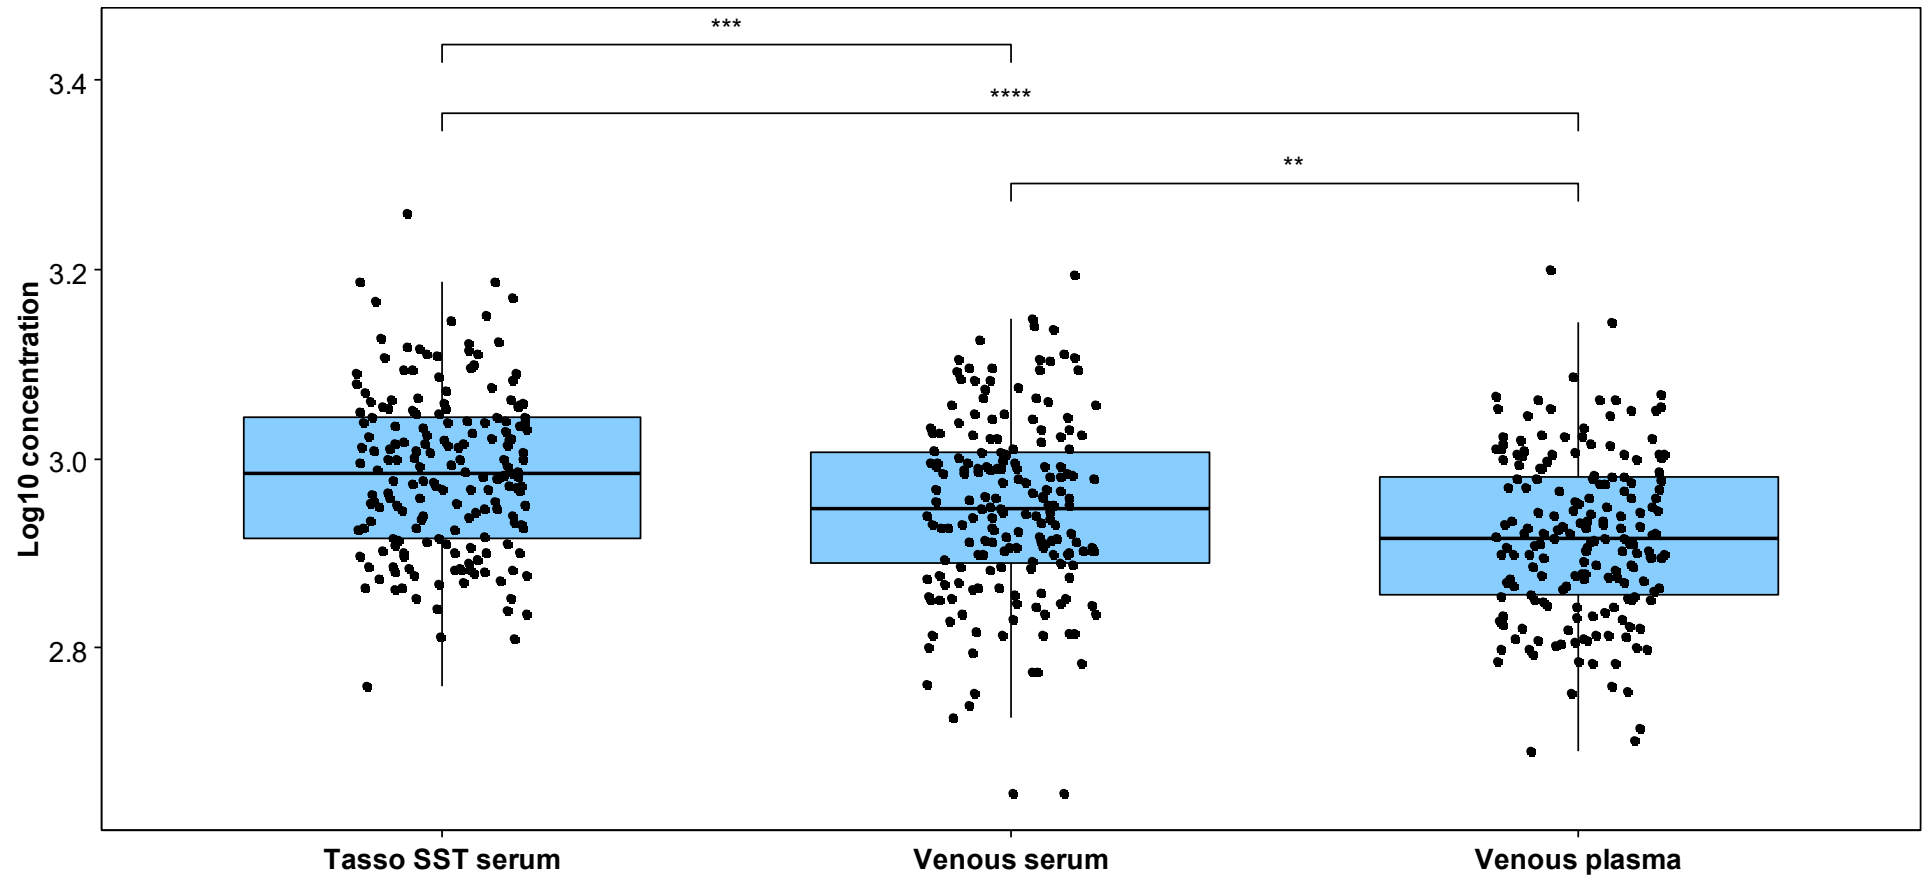



**VEGF-A**  
**TAMC healthy controls [supervised in-clinic collection]**  
**Matched samples - all time points [n=183]**

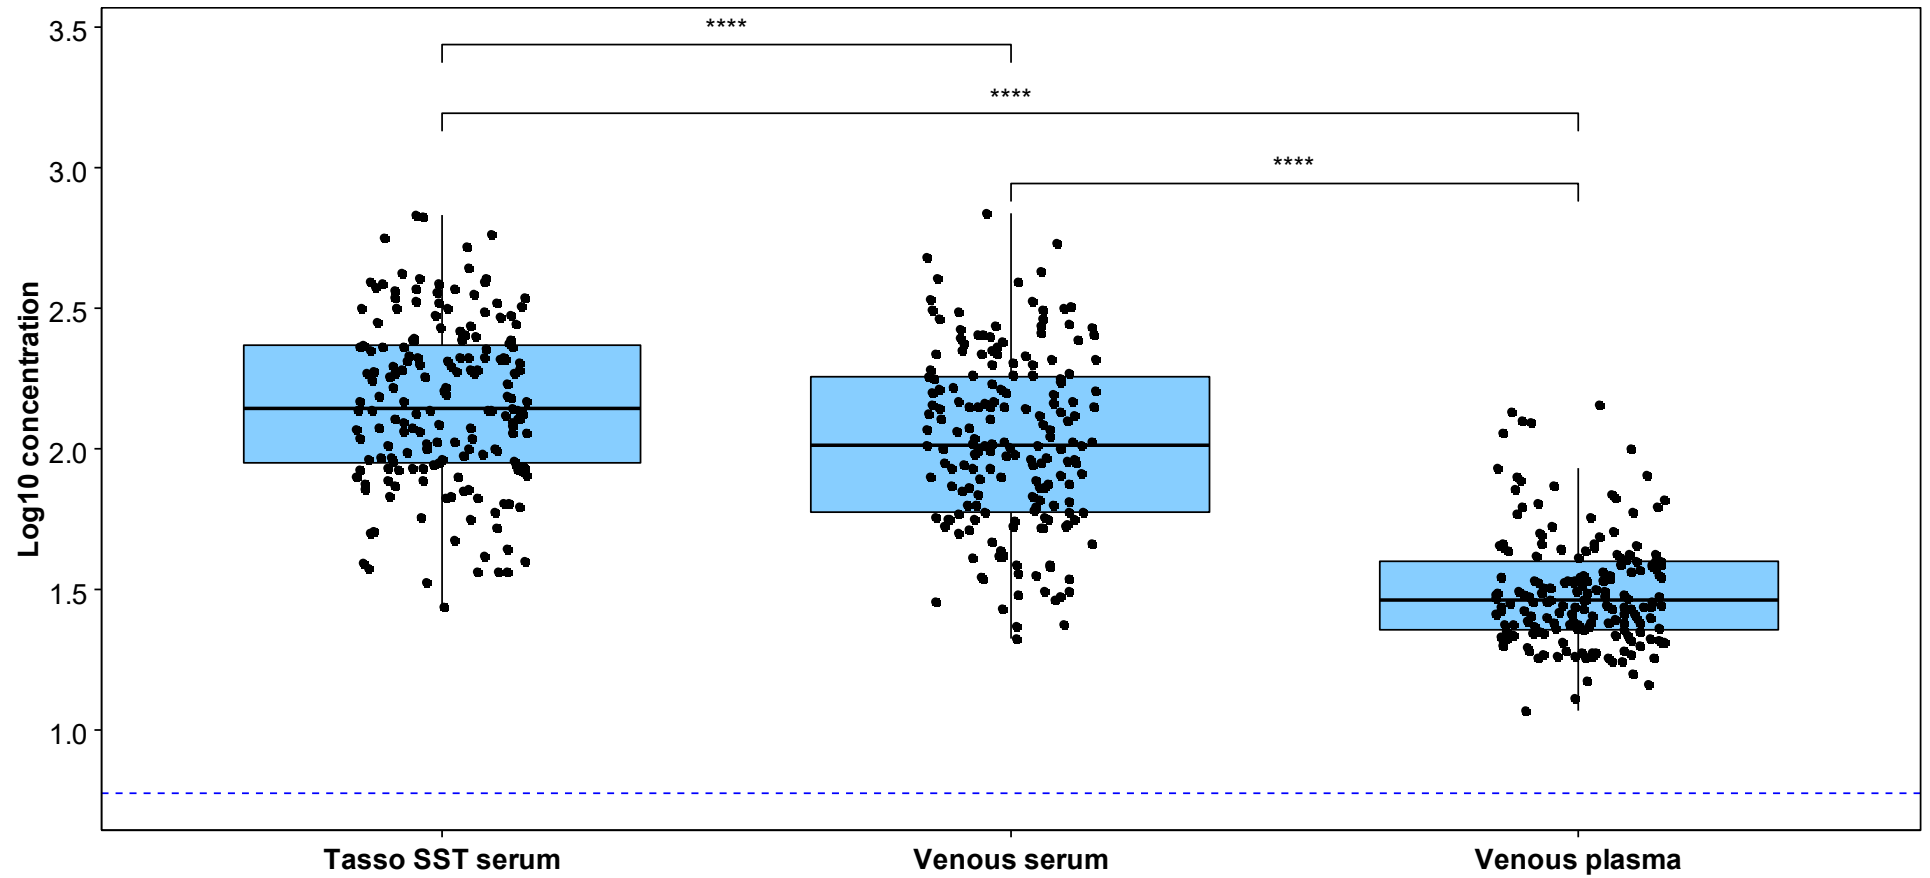

Supplement: pone.0272572.s004.pdf [file pone.0272572.s004.pdf]
