# Supplementary material for: Assessing the use of a micro-sampling device for measuring blood protein levels in healthy subjects and COVID-19 patients
Source: PubMed Central journal article supplement (PMC9365123; doi:10.1371/journal.pone.0272572), 2022-08-10

**CD163**

**TAMC healthy controls [supervised in-clinic collection]**

**Matched Venous serum and Tasso SST serum - all time points [n=152]**

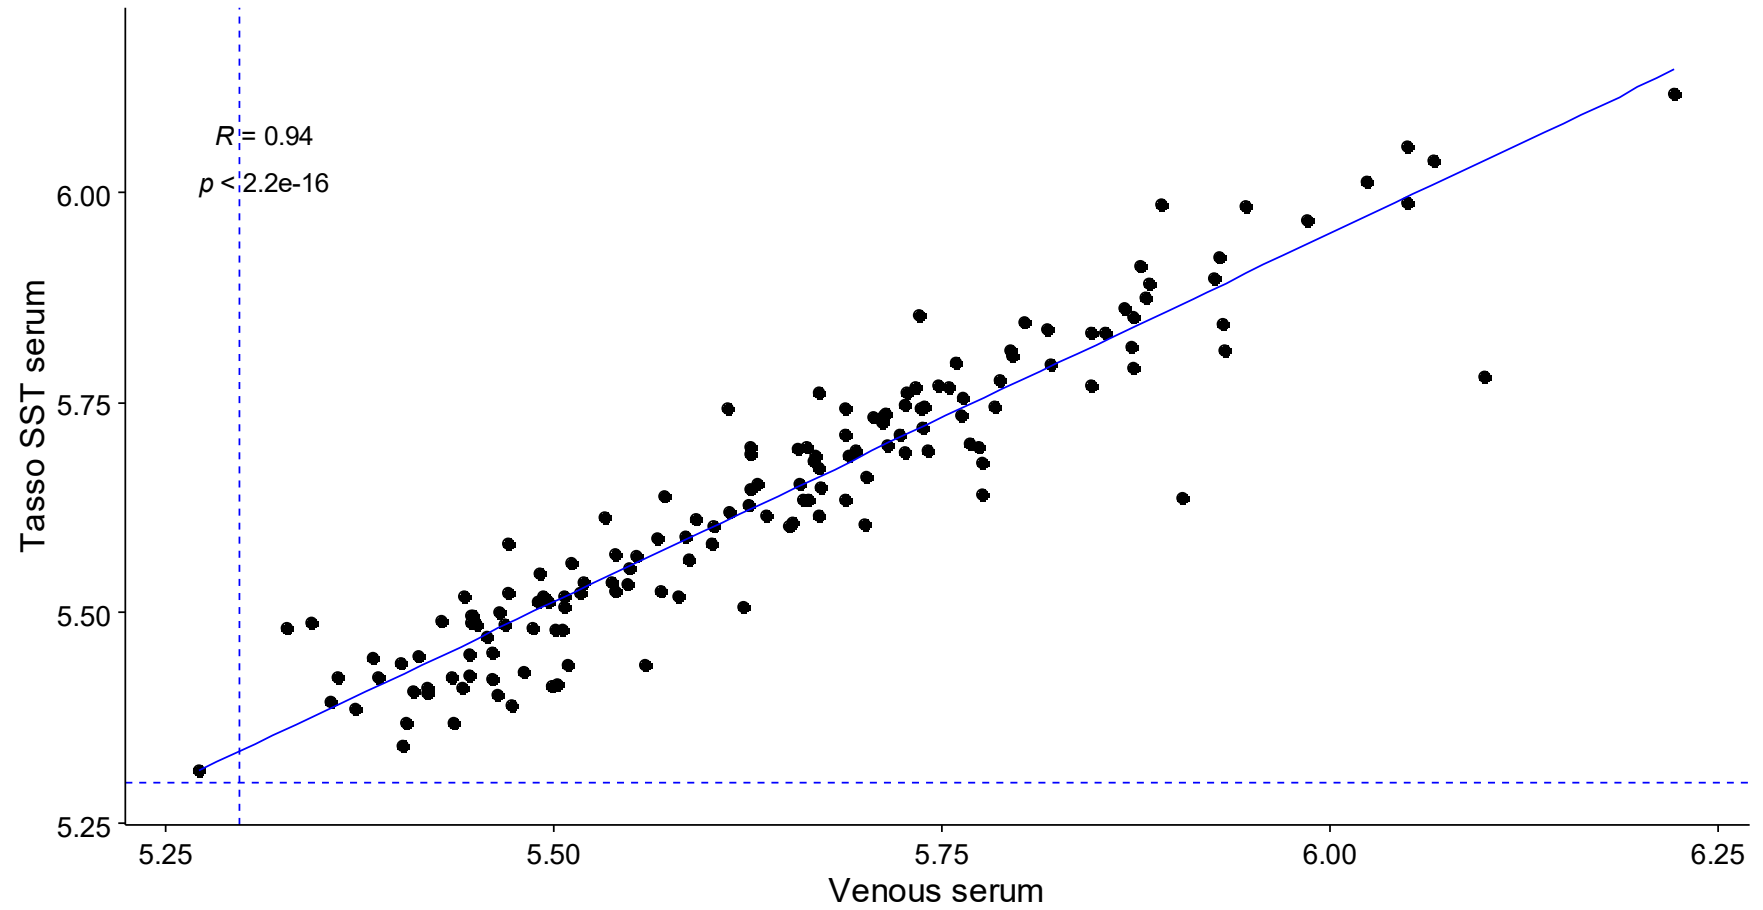

**CRP**

**TAMC healthy controls [supervised in-clinic collection]**

**Matched Venous serum and Tasso SST serum - all time points [n=183]**

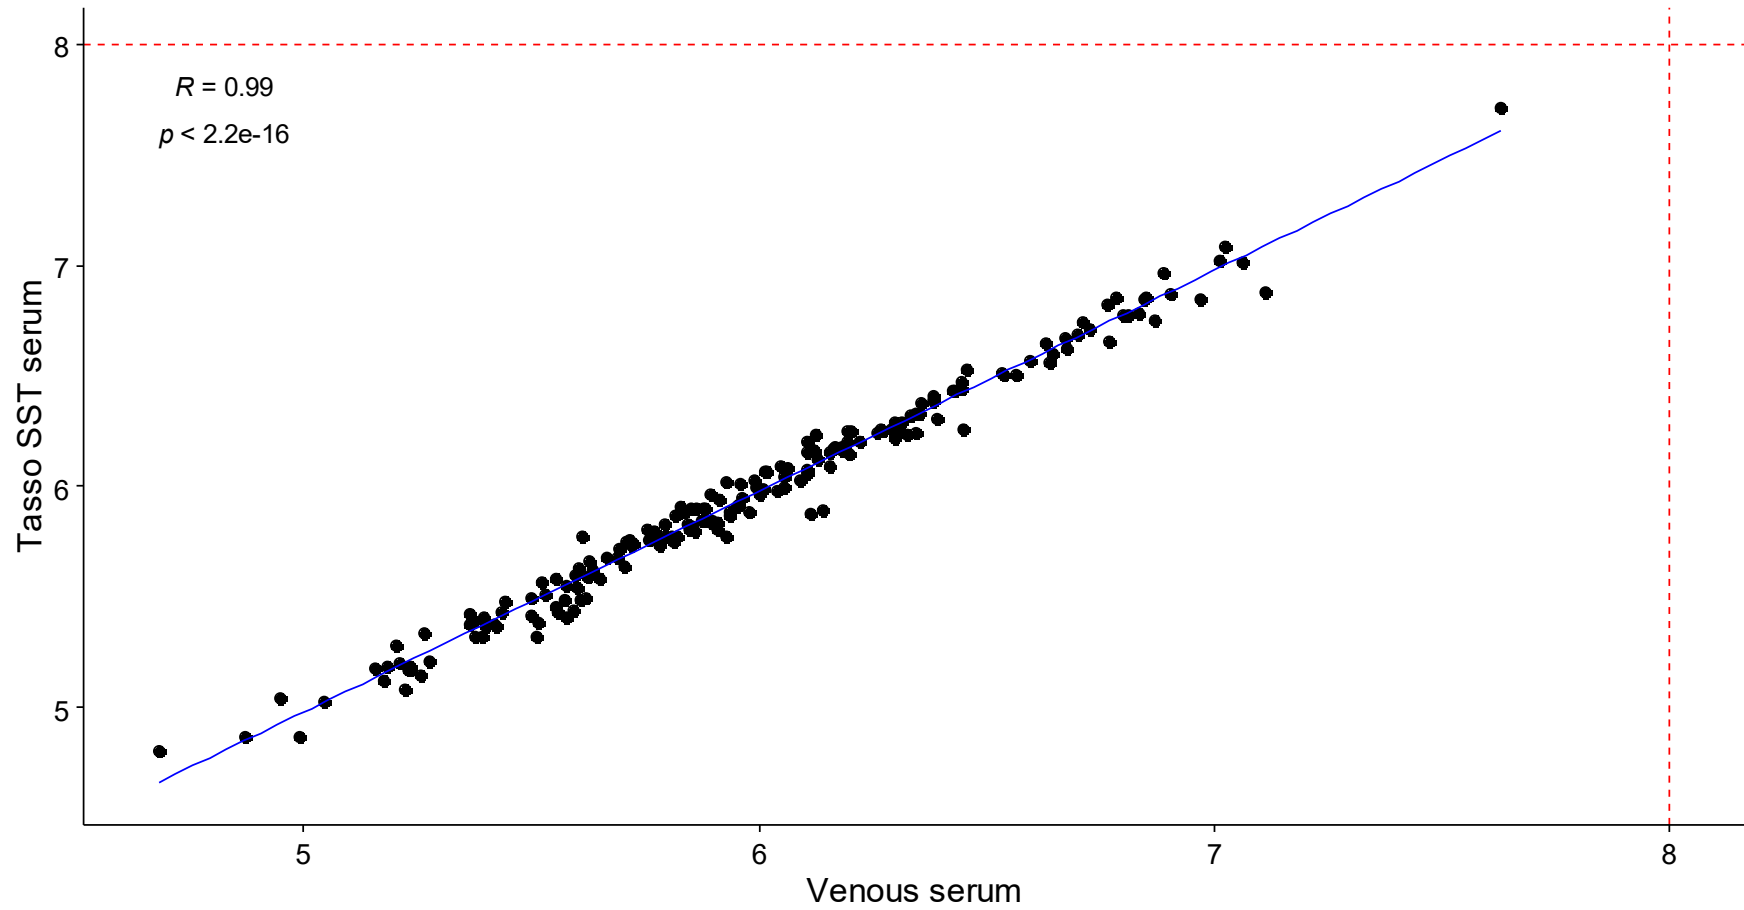

# CXCL10

TAMC healthy controls [supervised in-clinic collection]

Matched Venous serum and Tasso SST serum - all time points [n=152]

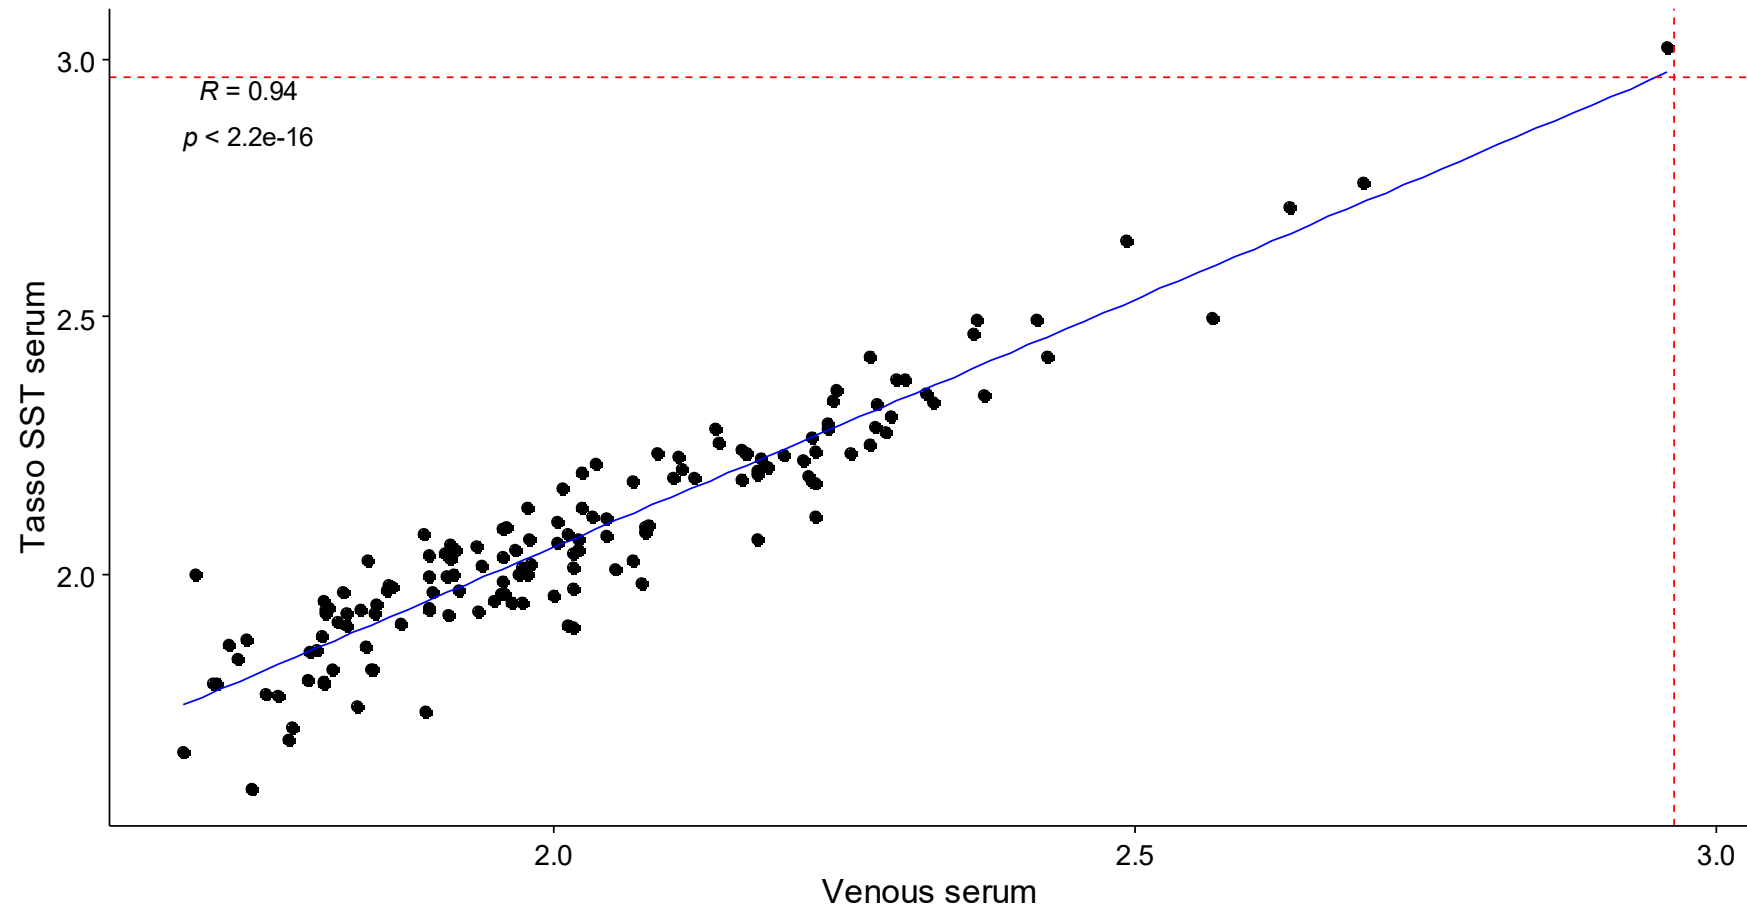

### D-dimer

TAMC healthy controls [supervised in-clinic collection]

Matched Venous serum and Tasso SST serum - all time points [n=183]

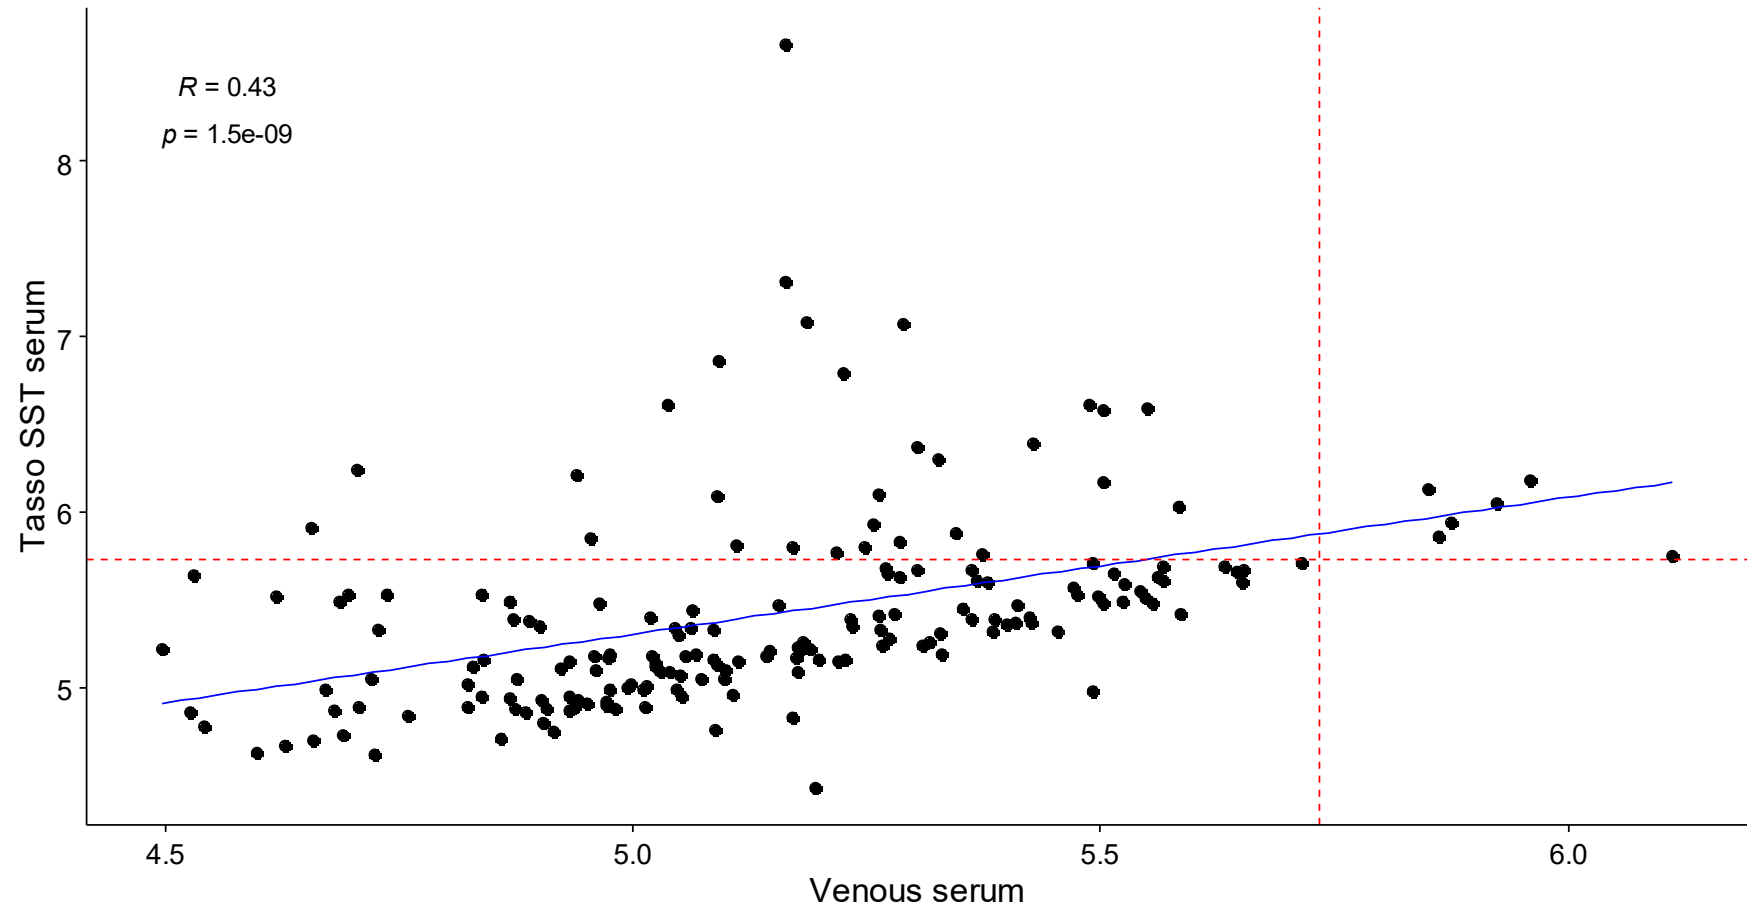

**Ferritin**  
**TAMC healthy controls [supervised in-clinic collection]**  
**Matched Venous serum and Tasso SST serum - all time points [n=183]**

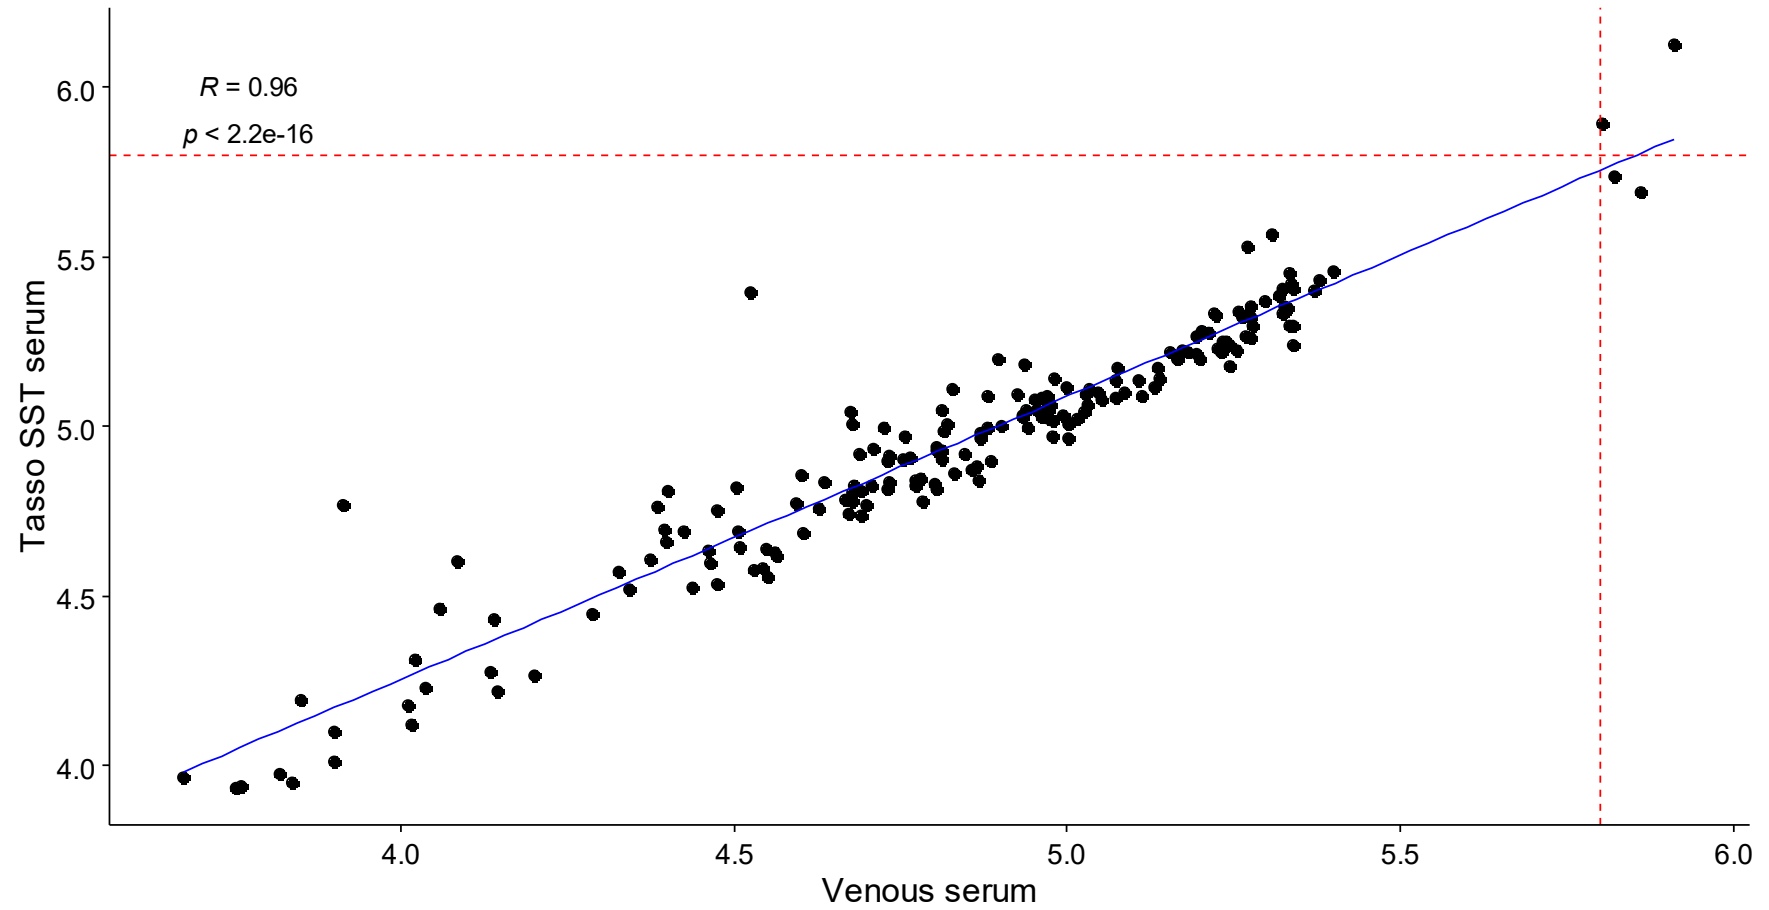

### ICAM-1

TAMC healthy controls [supervised in-clinic collection]

Matched Venous serum and Tasso SST serum - all time points [n=183]

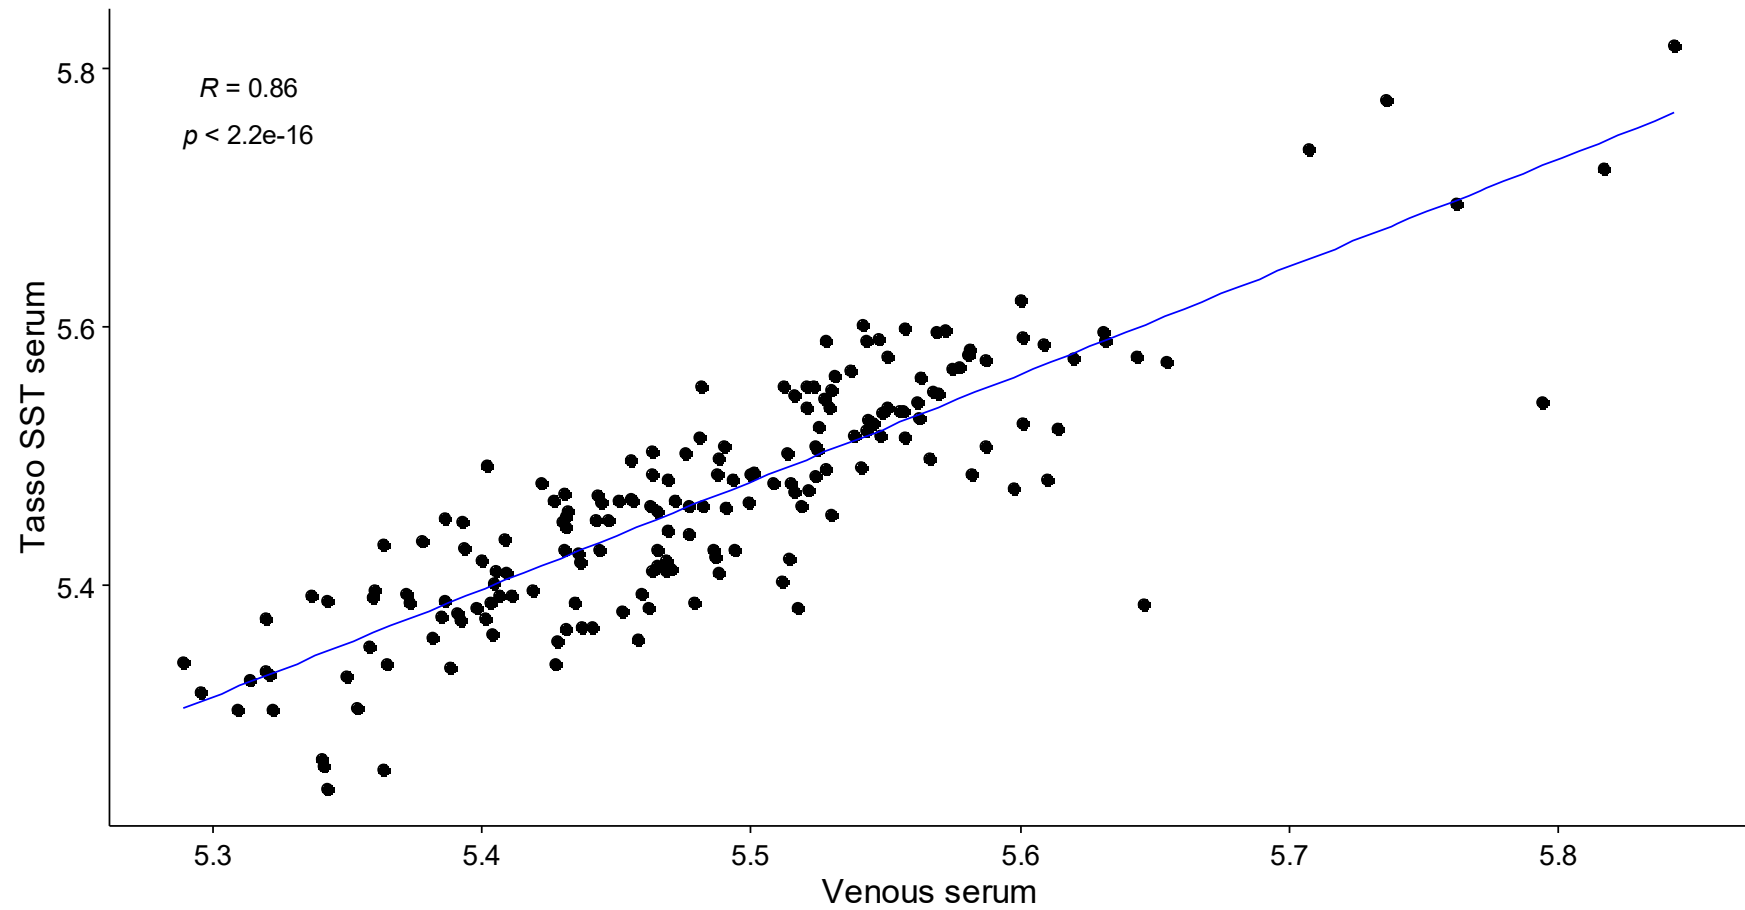

**IL-1B**

**TAMC healthy controls [supervised in-clinic collection]**

**Matched Venous serum and Tasso SST serum - all time points [n=183]**

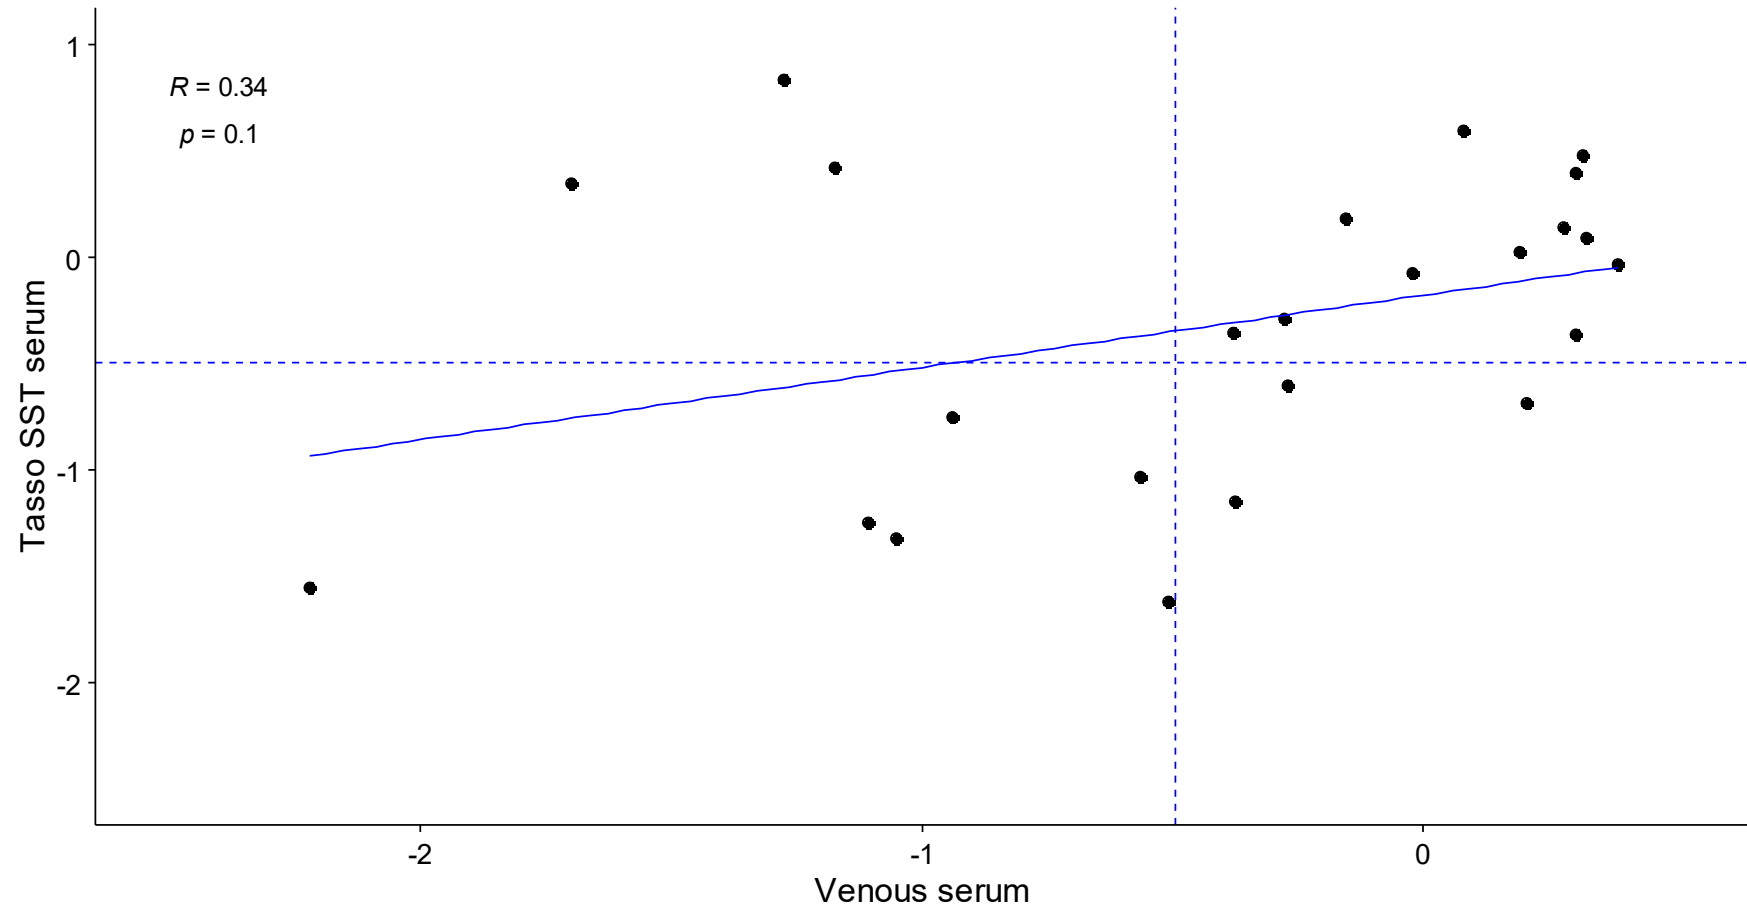

**IL-1Ra**

**TAMC healthy controls [supervised in-clinic collection]**

**Matched Venous serum and Tasso SST serum - all time points [n=183]**

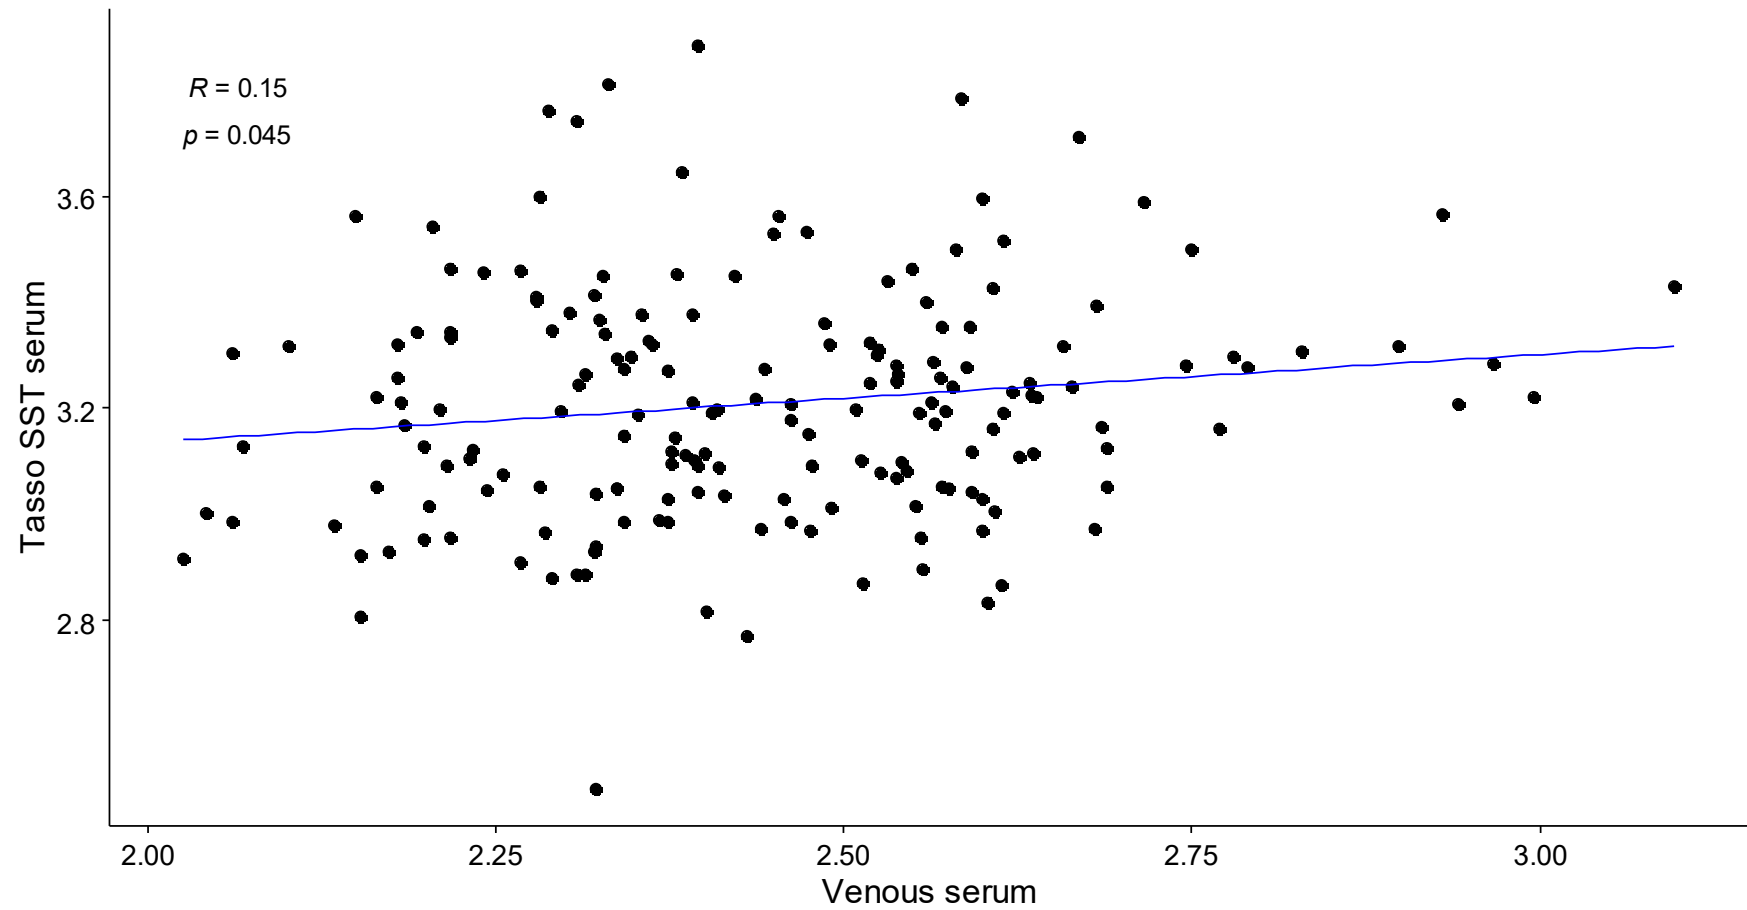



**IL-5**

**TAMC healthy controls [supervised in-clinic collection]**

**Matched Venous serum and Tasso SST serum - all time points [n=183]**

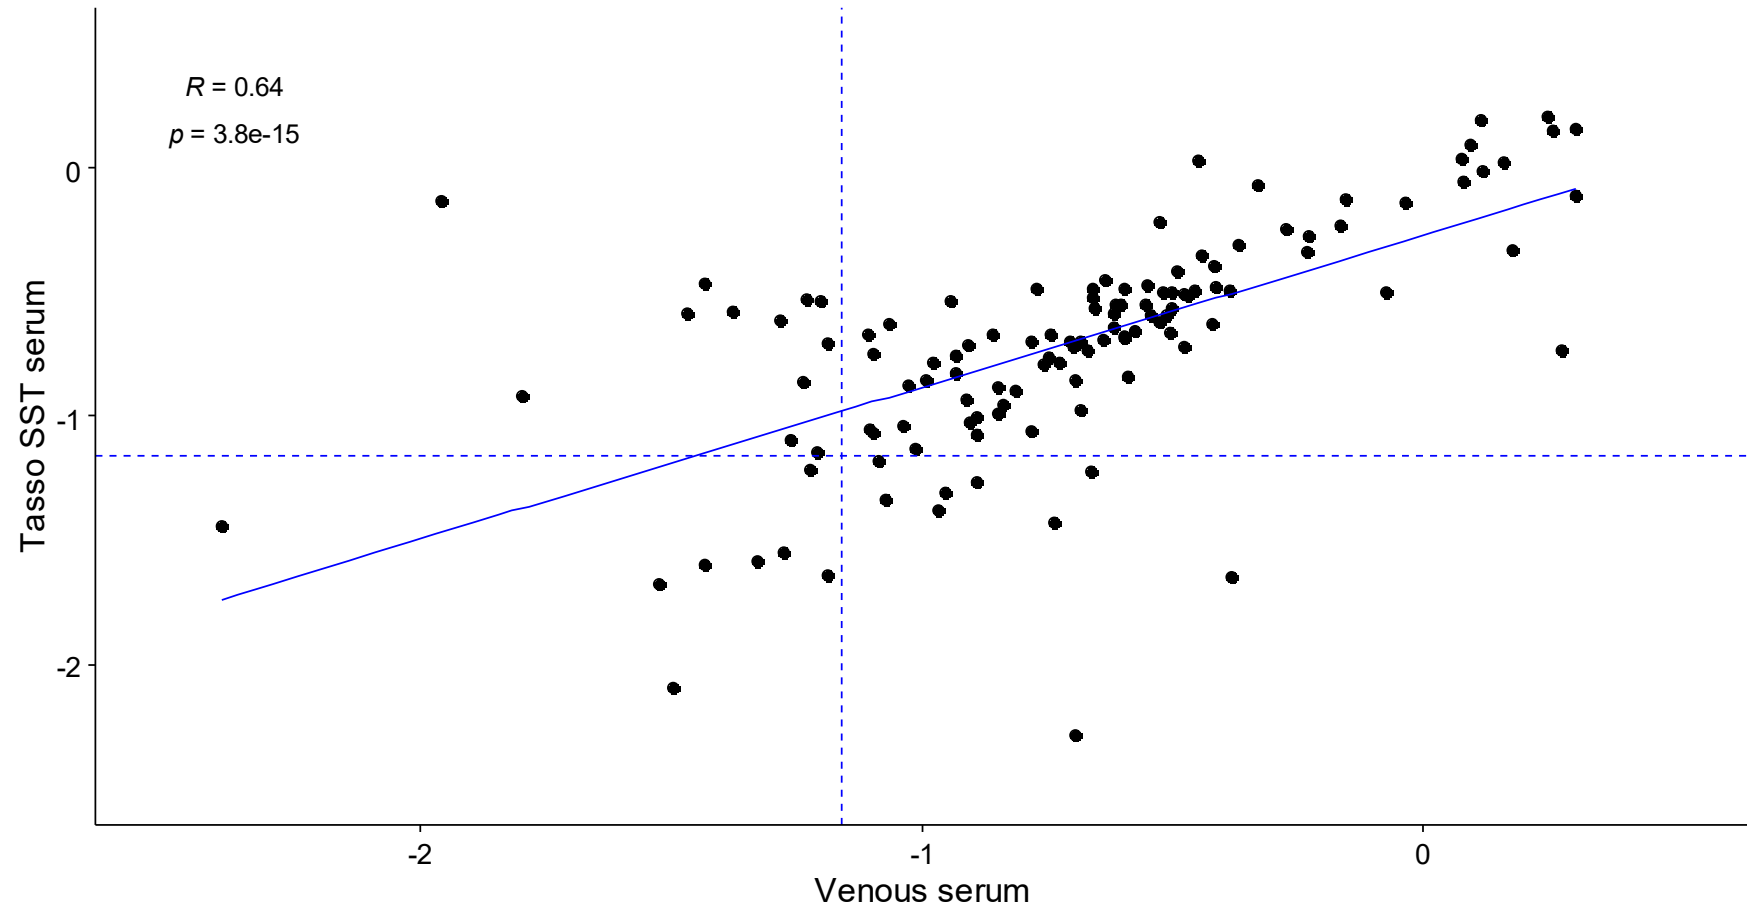

**IL-6**  
**TAMC healthy controls [supervised in-clinic collection]**  
**Matched Venous serum and Tasso SST serum - all time points [n=183]**

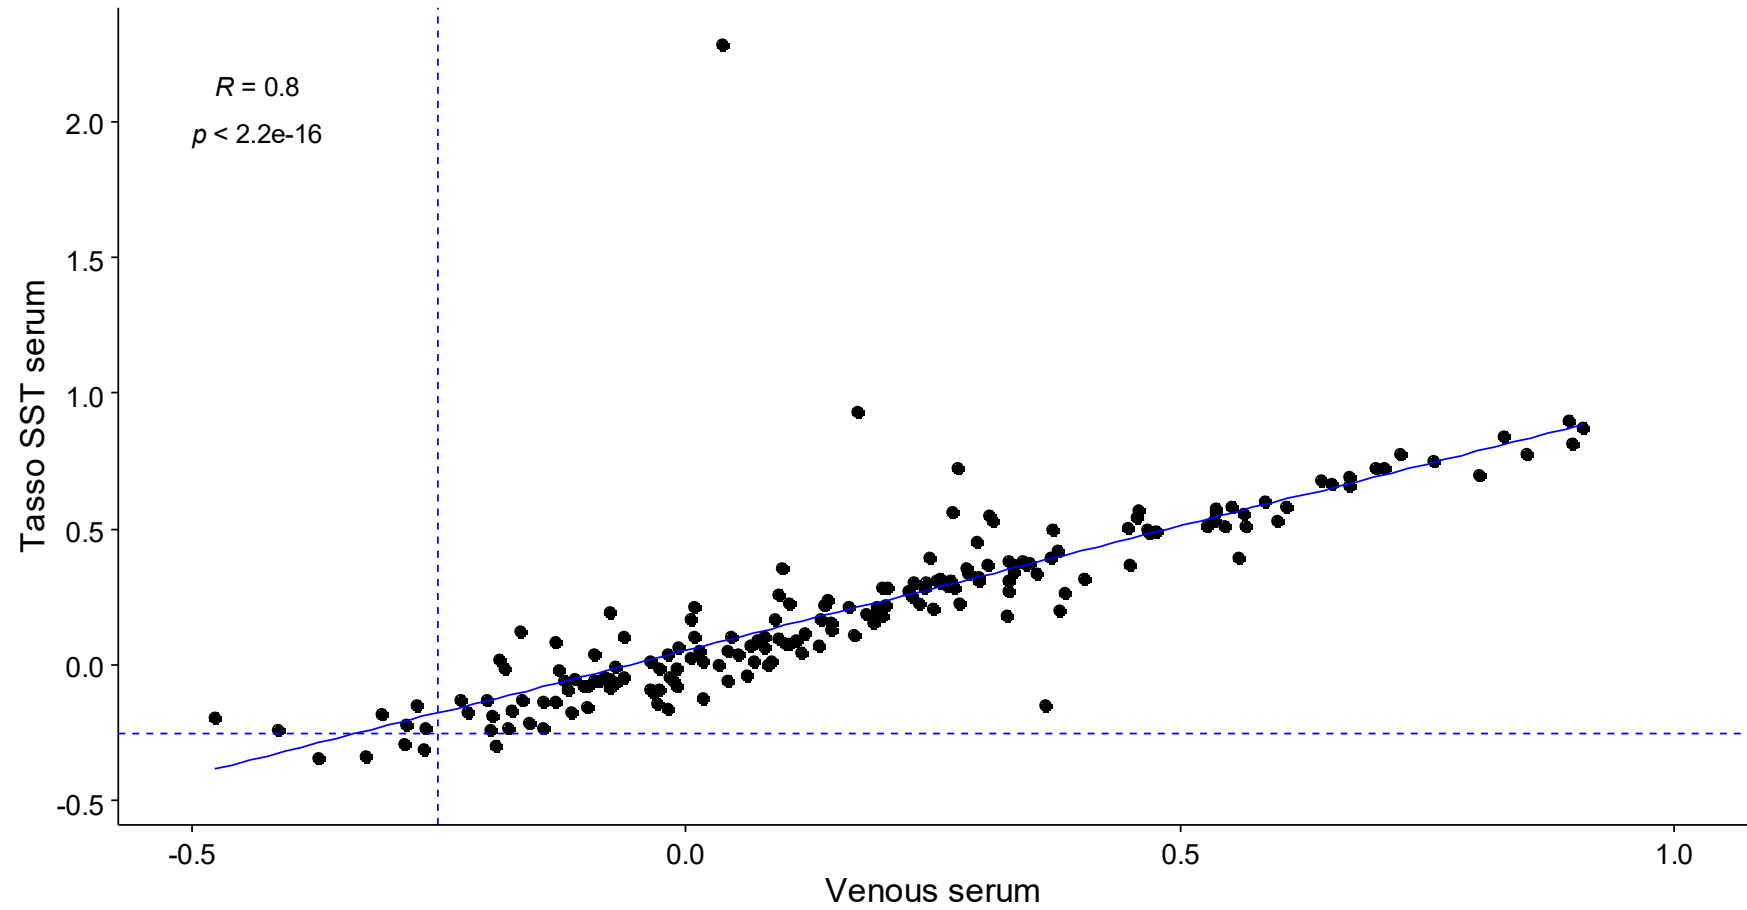

**IL-6Ra**

**TAMC healthy controls [supervised in-clinic collection]**

**Matched Venous serum and Tasso SST serum - all time points [n=183]**

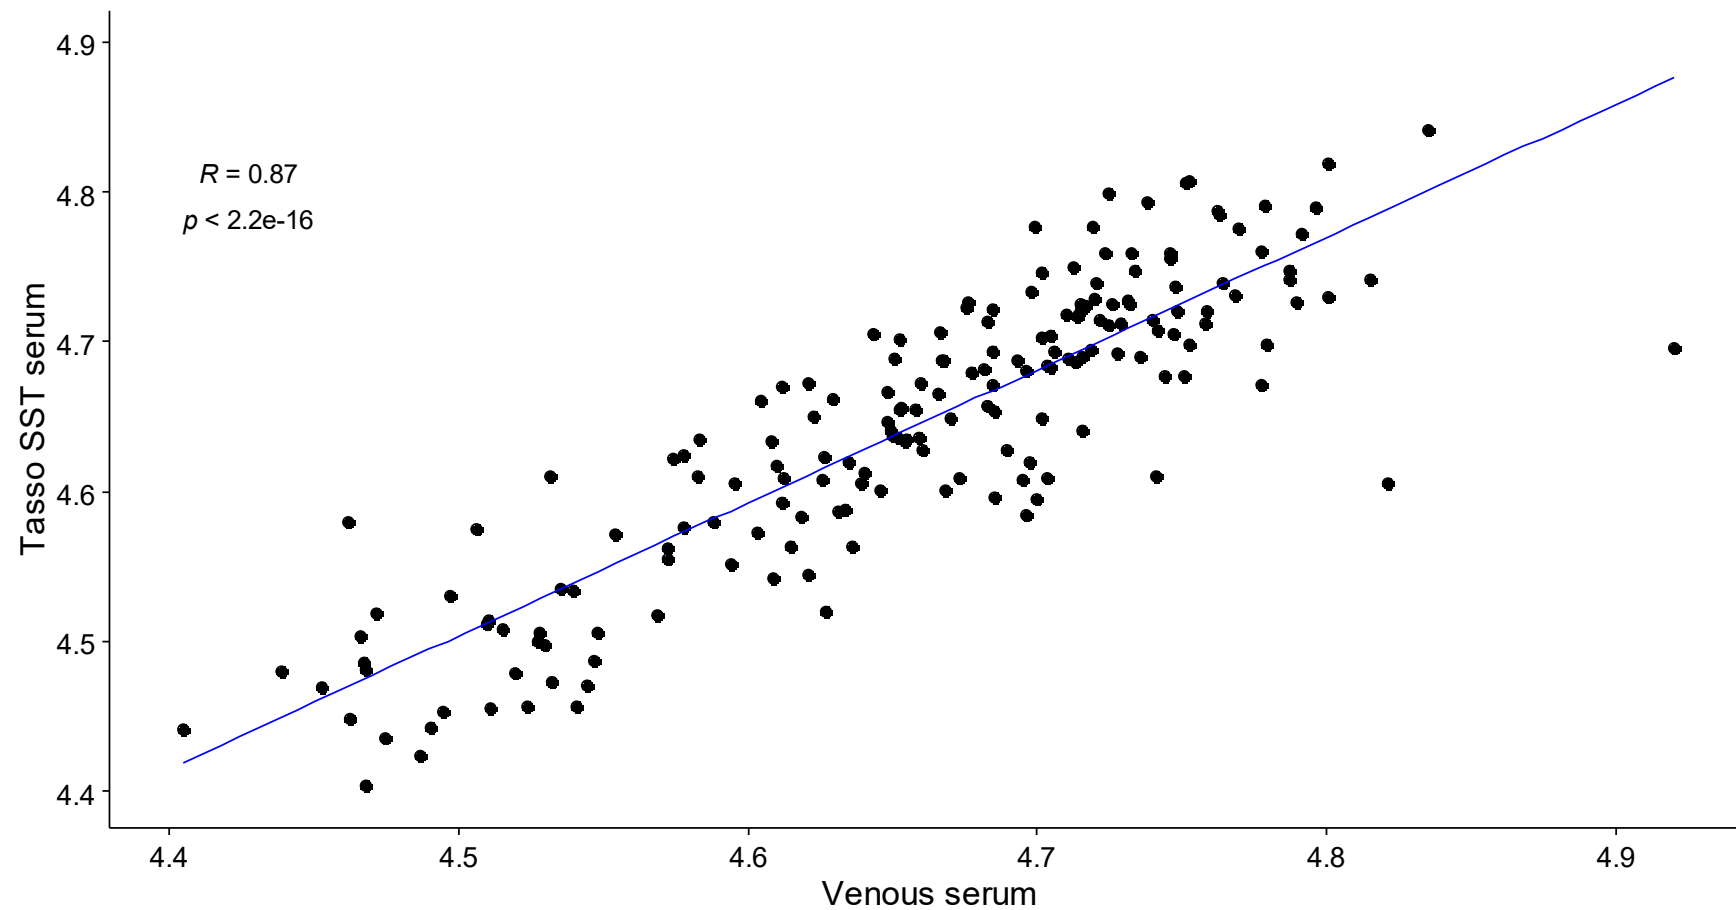

**IL-18BPa**

**TAMC healthy controls [supervised in-clinic collection]**

**Matched Venous serum and Tasso SST serum - all time points [n=183]**

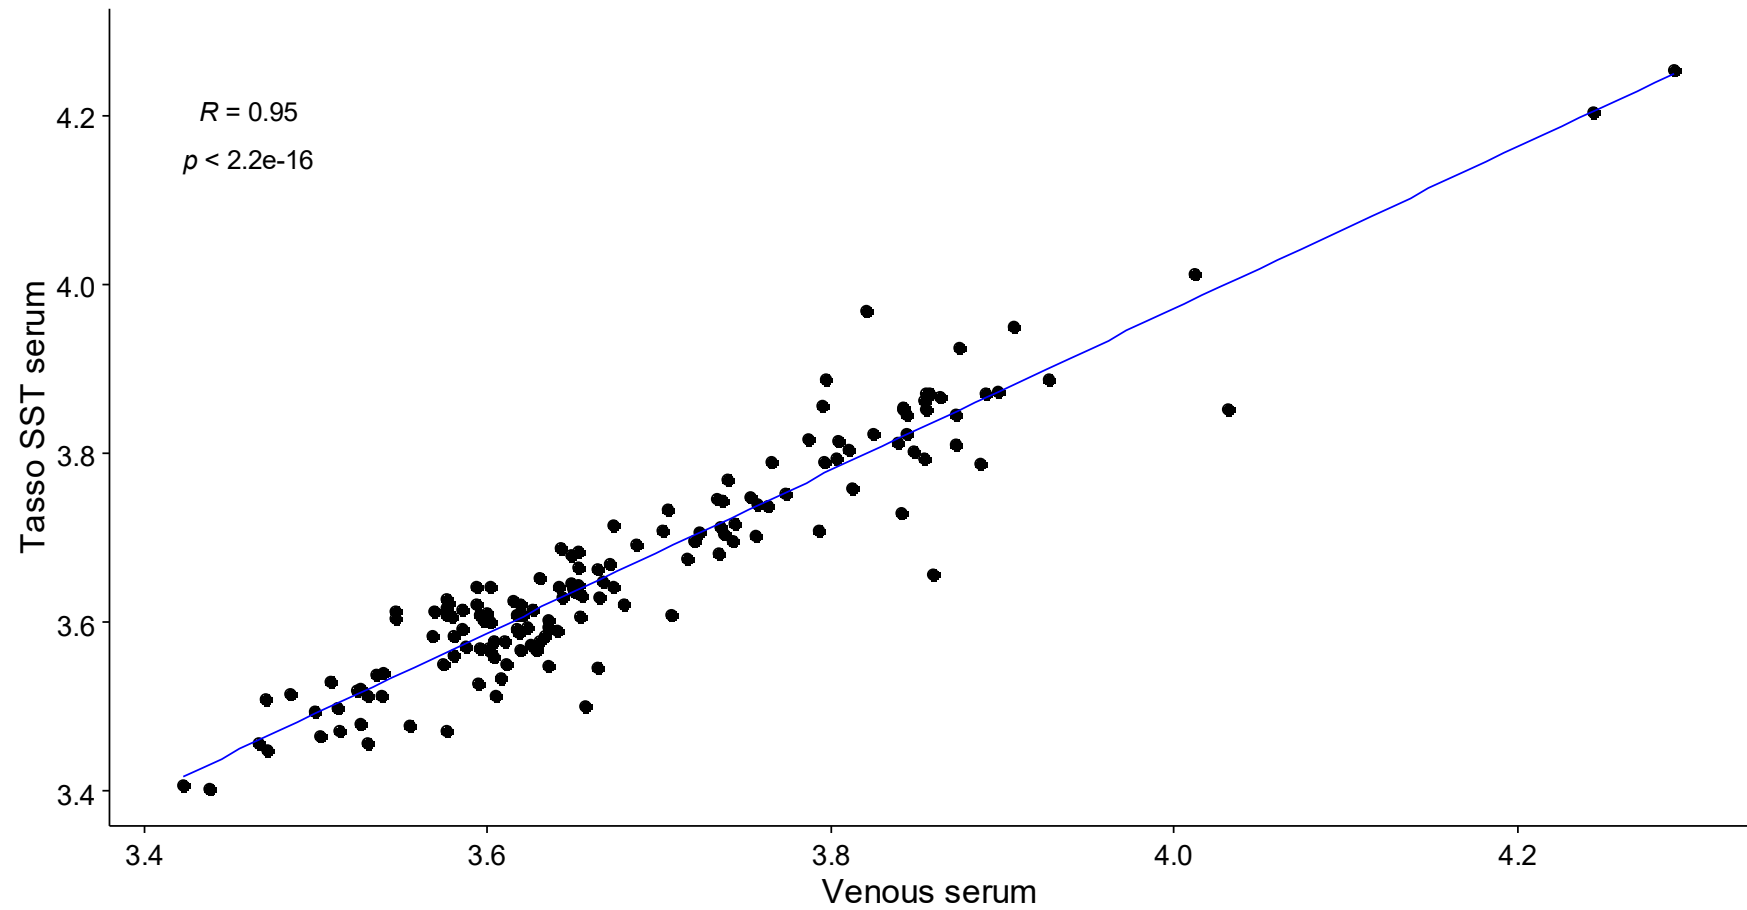

**LCN**  
**TAMC healthy controls [supervised in-clinic collection]**  
**Matched Venous serum and Tasso SST serum - all time points [n=183]**

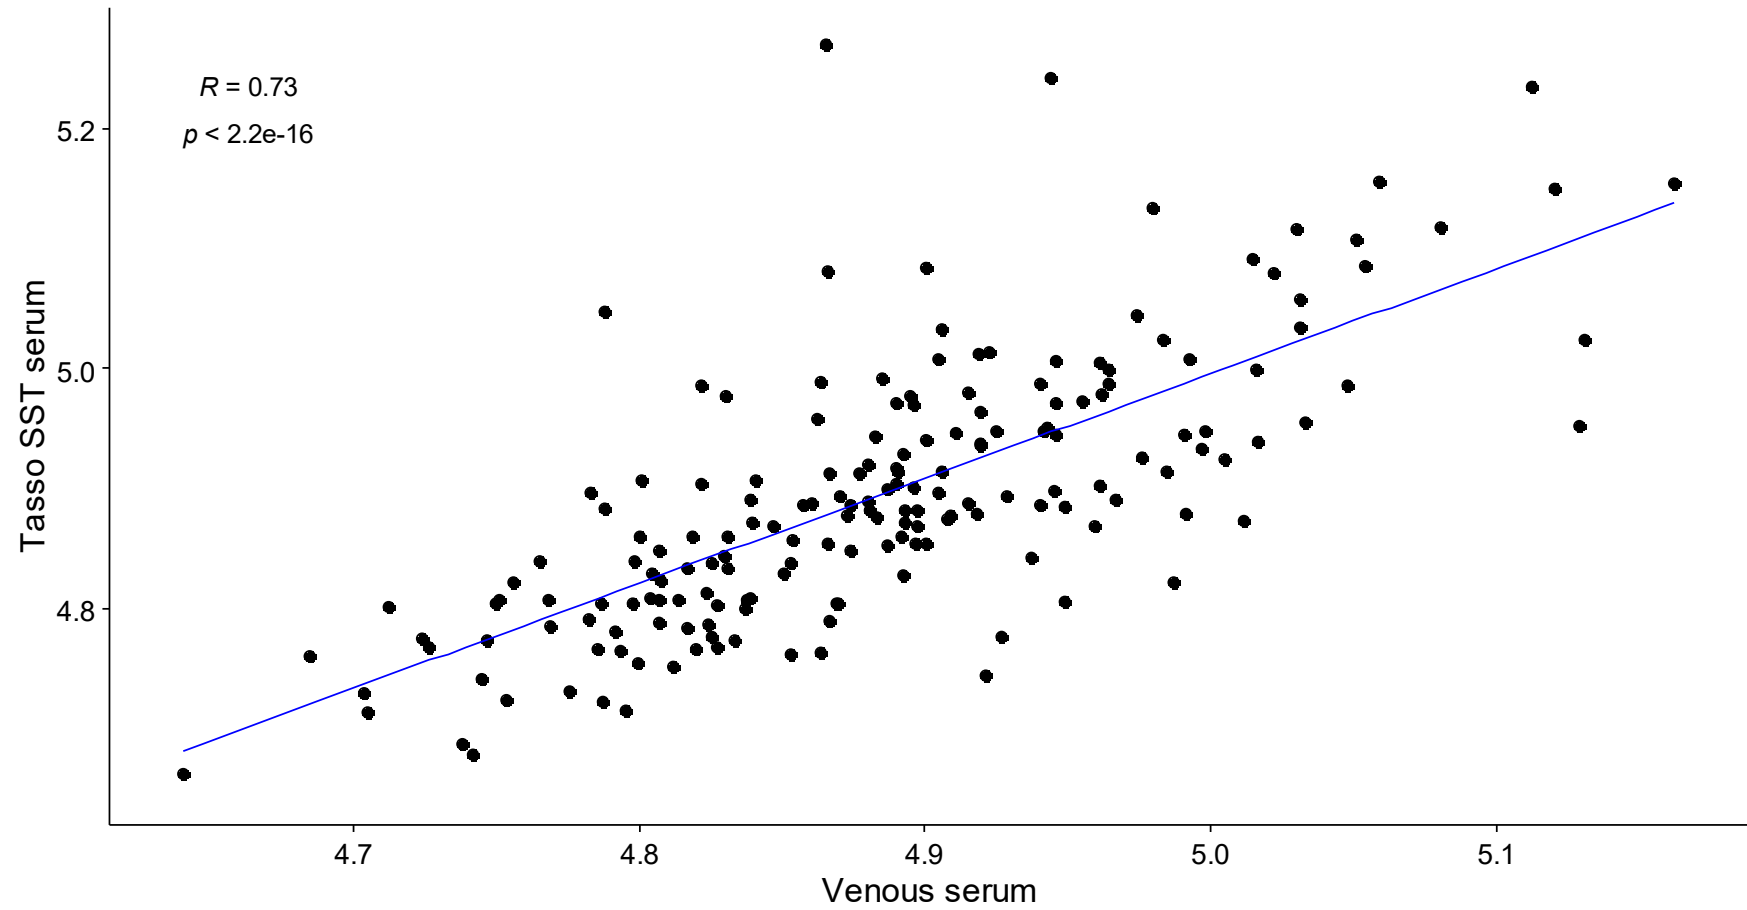

**PCT**  
**TAMC healthy controls [supervised in-clinic collection]**  
**Matched Venous serum and Tasso SST serum - all time points [n=183]**

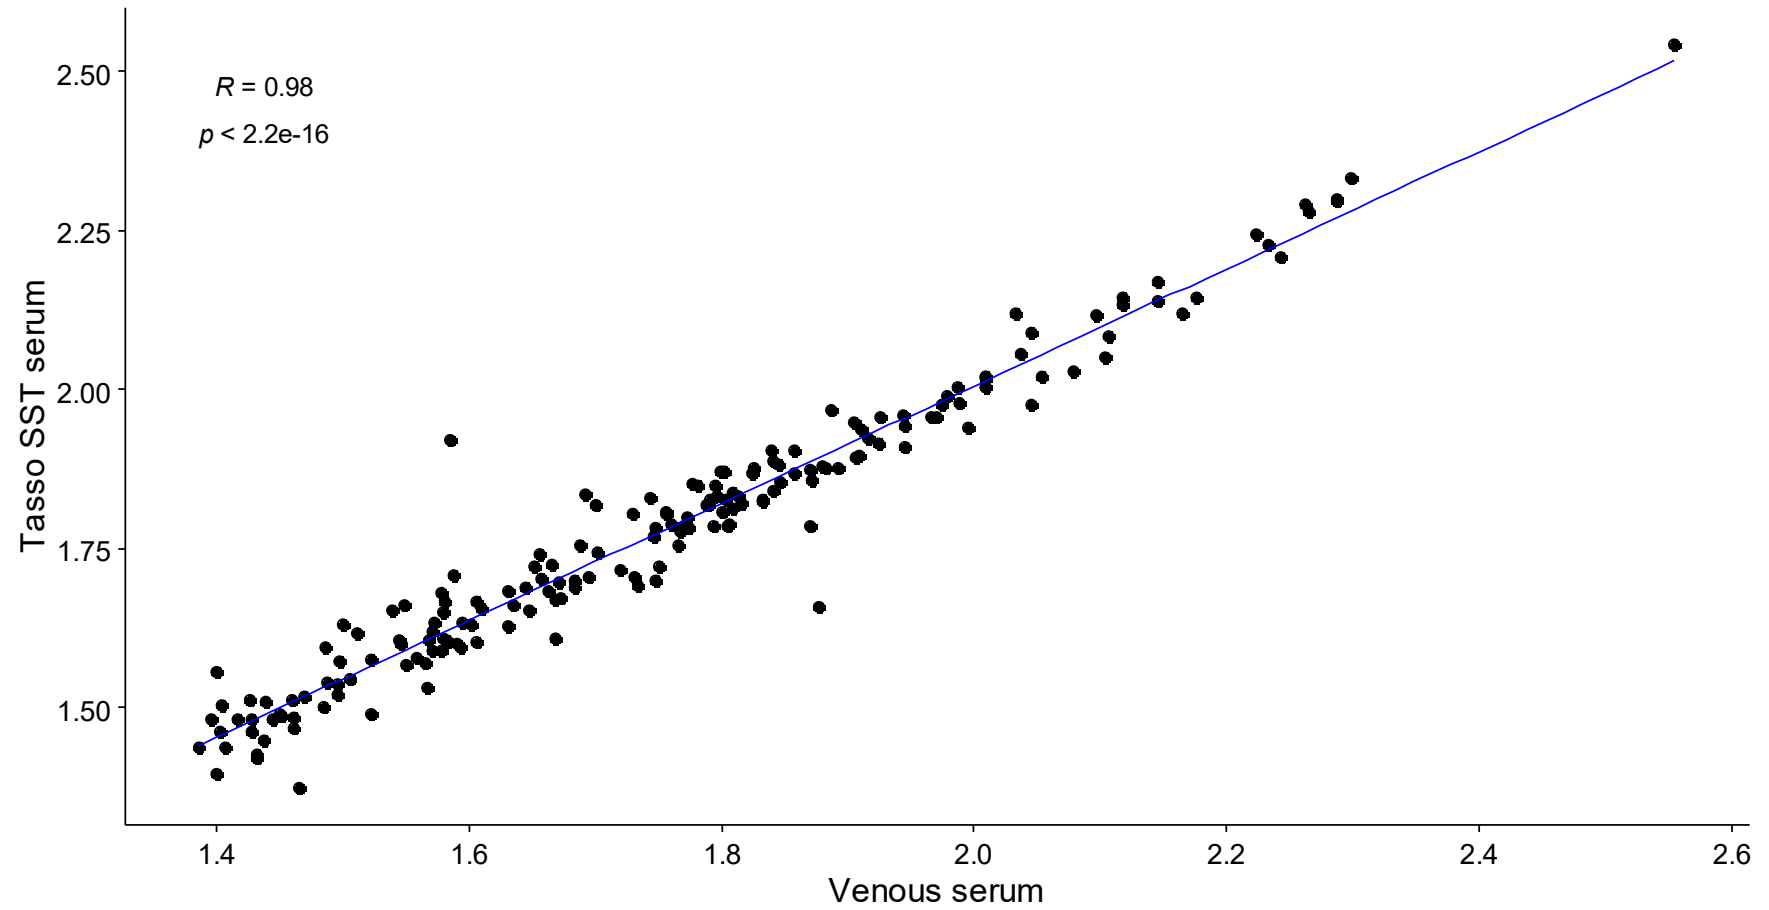

**RAGE**

**TAMC healthy controls [supervised in-clinic collection]**

**Matched Venous serum and Tasso SST serum - all time points [n=183]**

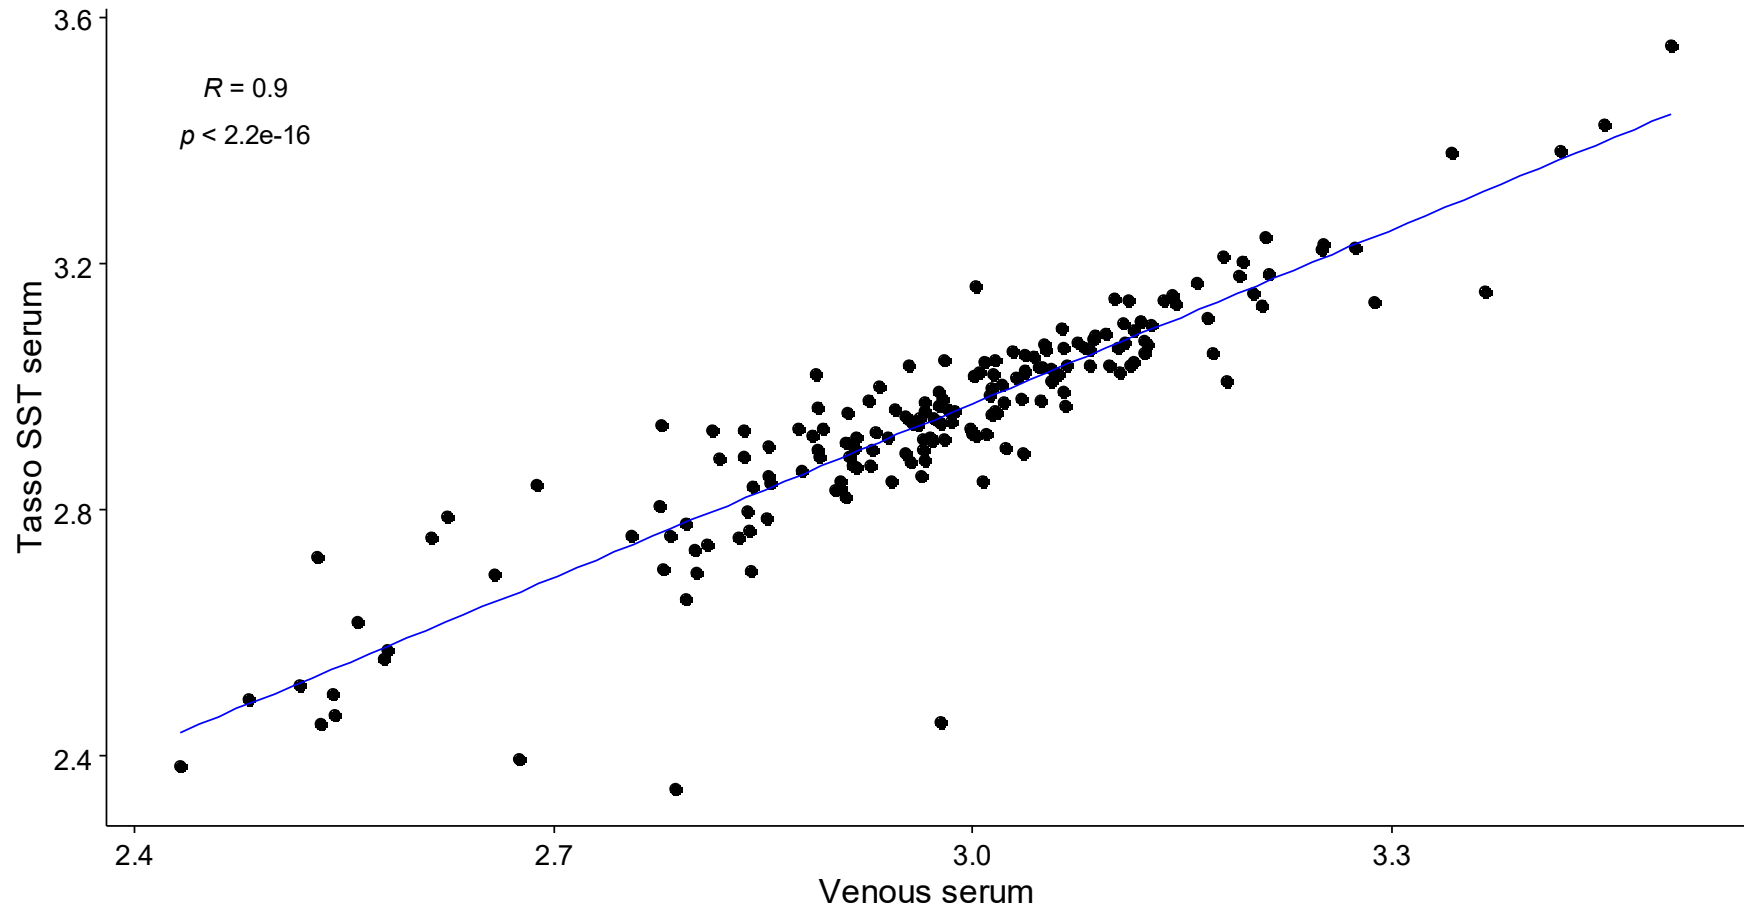

**TNF-R1**

**TAMC healthy controls [supervised in-clinic collection]**

**Matched Venous serum and Tasso SST serum - all time points [n=183]**

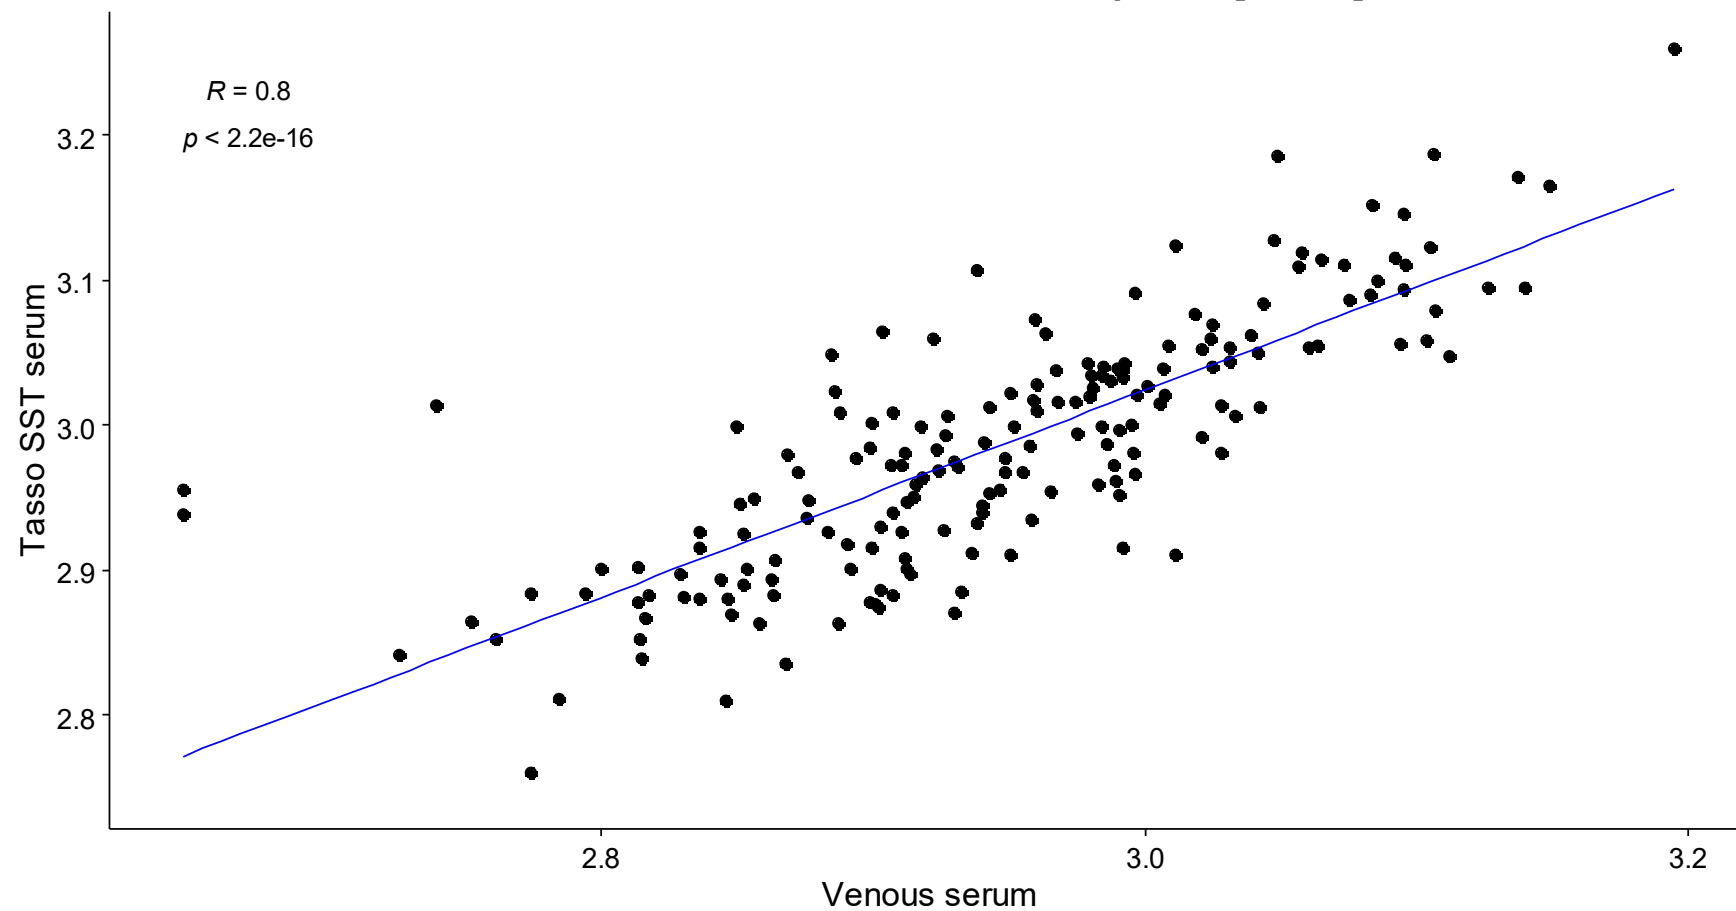



**VEGF-A**

**TAMC healthy controls [supervised in-clinic collection]**

**Matched Venous serum and Tasso SST serum - all time points [n=183]**

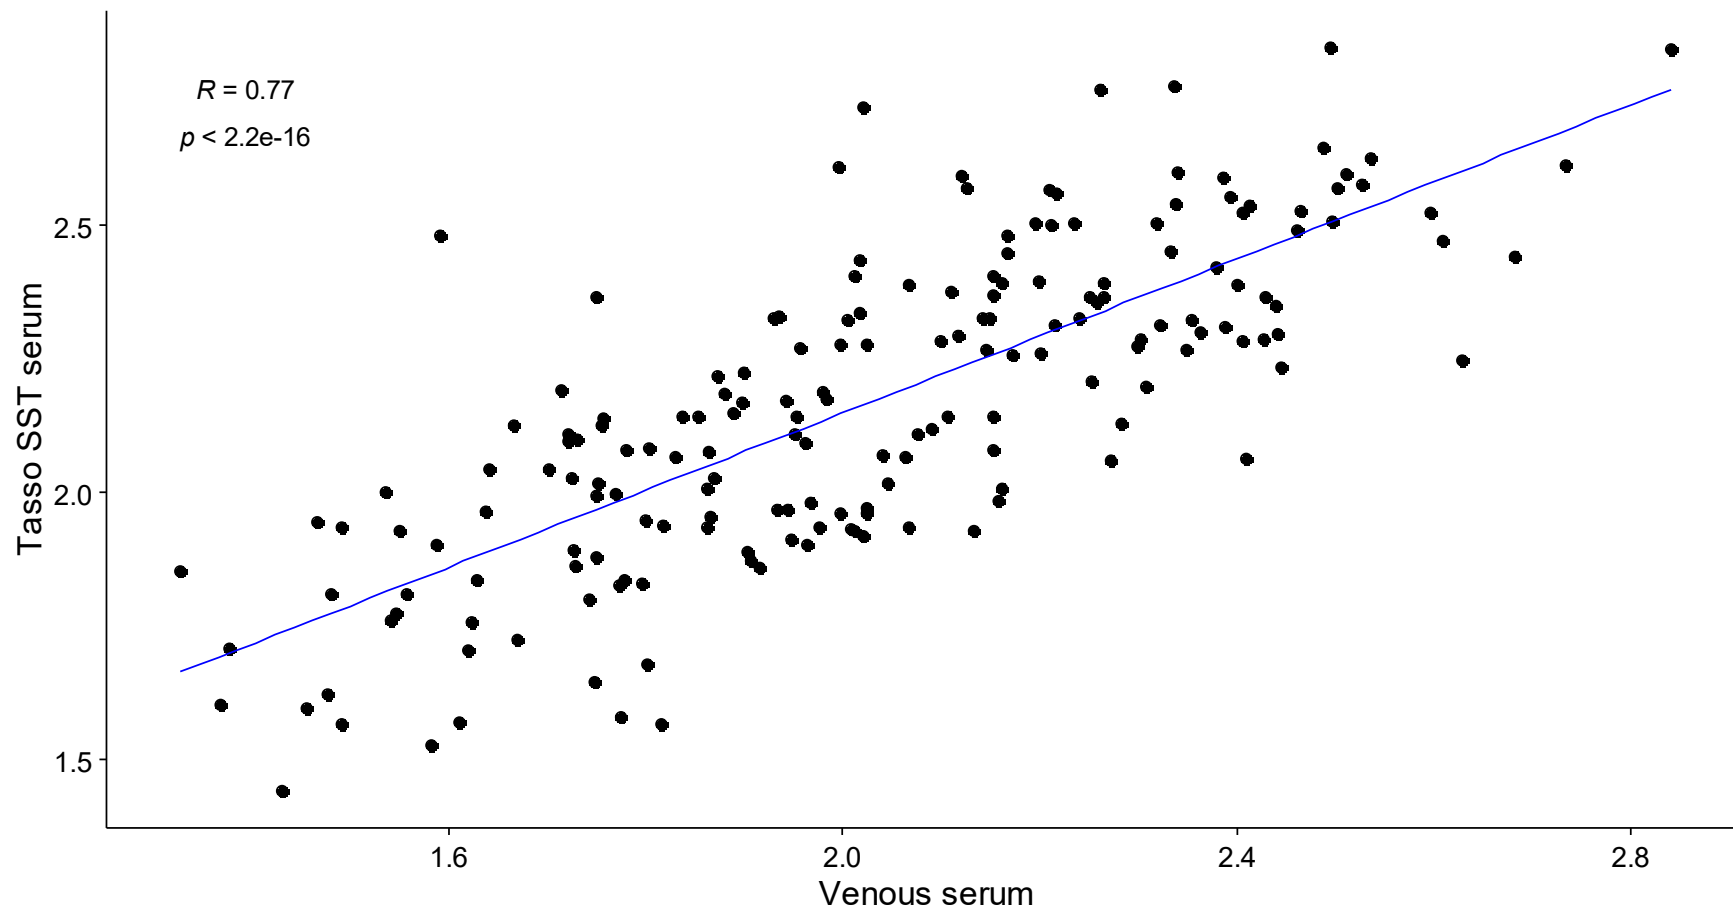

Supplement: pone.0272572.s005.pdf [file pone.0272572.s005.pdf]
