# Supplementary material for: Assessing the use of a micro-sampling device for measuring blood protein levels in healthy subjects and COVID-19 patients
Source: PubMed Central journal article supplement (PMC9365123; doi:10.1371/journal.pone.0272572), 2022-08-10

**CD163**

**TAMC healthy controls [supervised in-clinic collection]**

**Matched Venous serum and Tasso SST serum [n=152] - T-test p = 0.36**

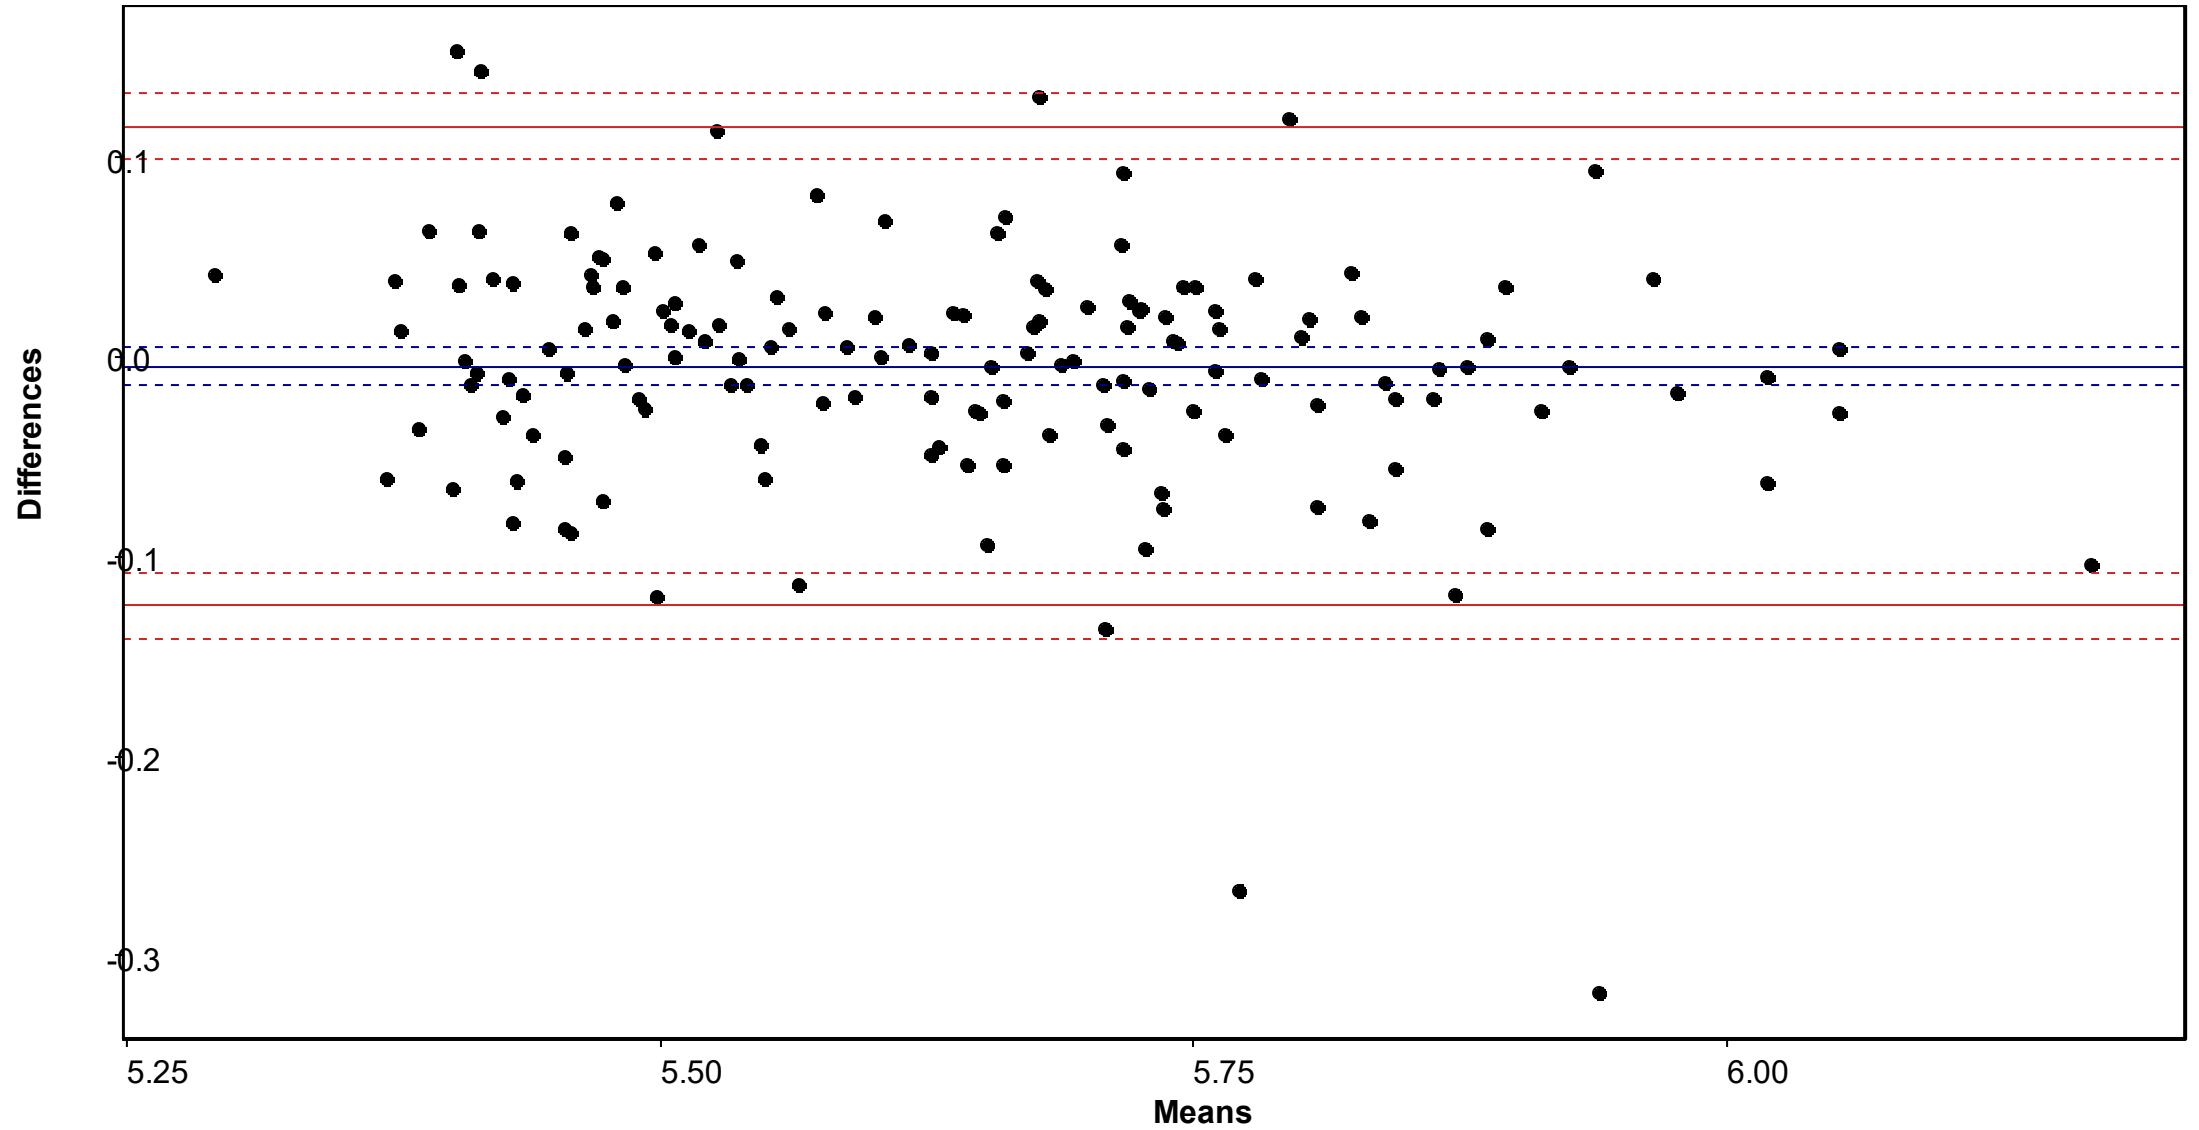

# CRP

TAMC healthy controls [supervised in-clinic collection]

Matched Venous serum and Tasso SST serum [n=183] - T-test p = 5.68e-05

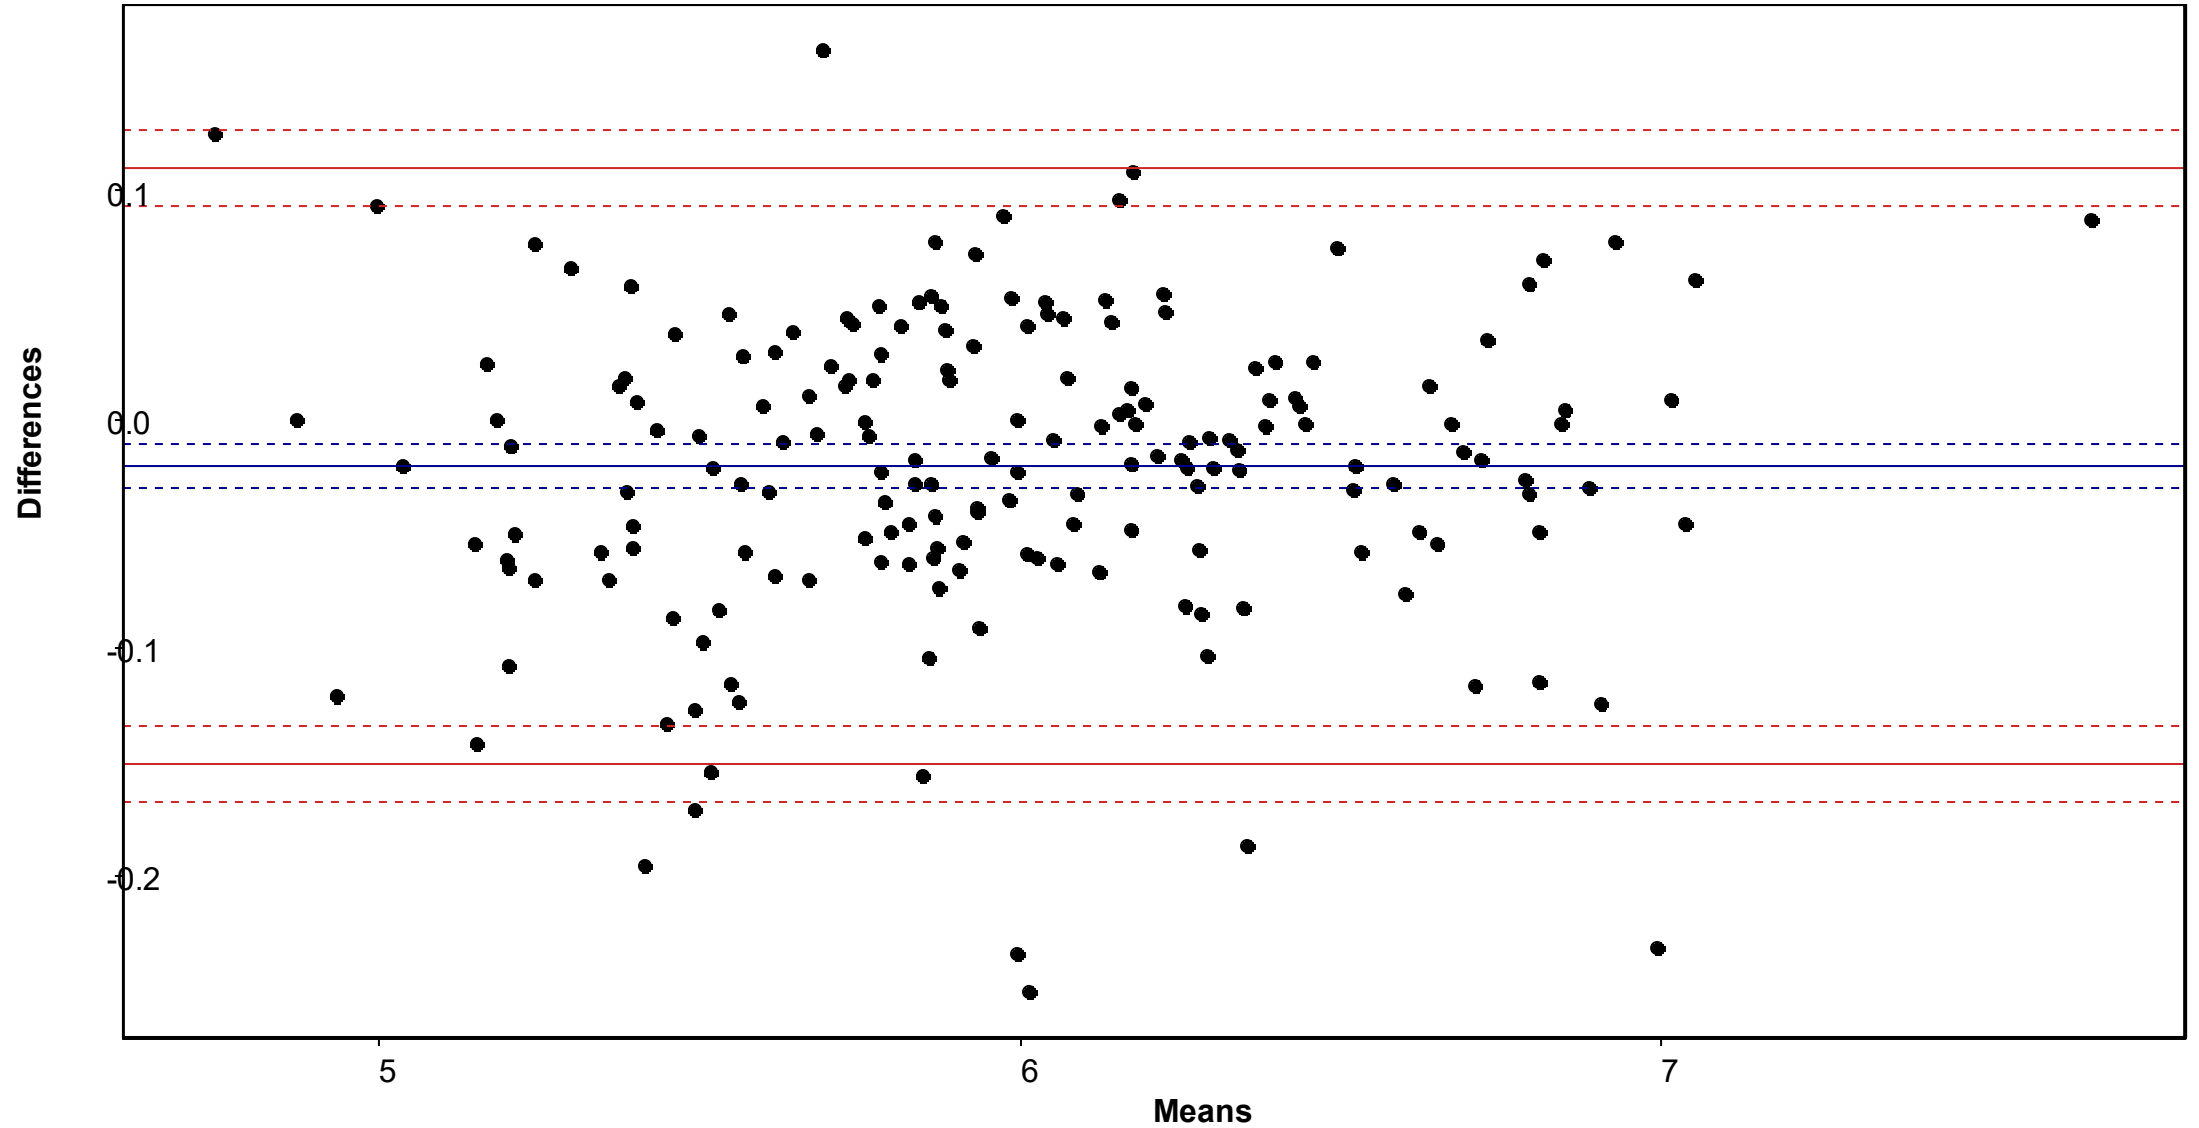

**CXCL10**

**TAMC healthy controls [supervised in-clinic collection]**

**Matched Venous serum and Tasso SST serum [n=152] - T-test p = 8.63e-13**

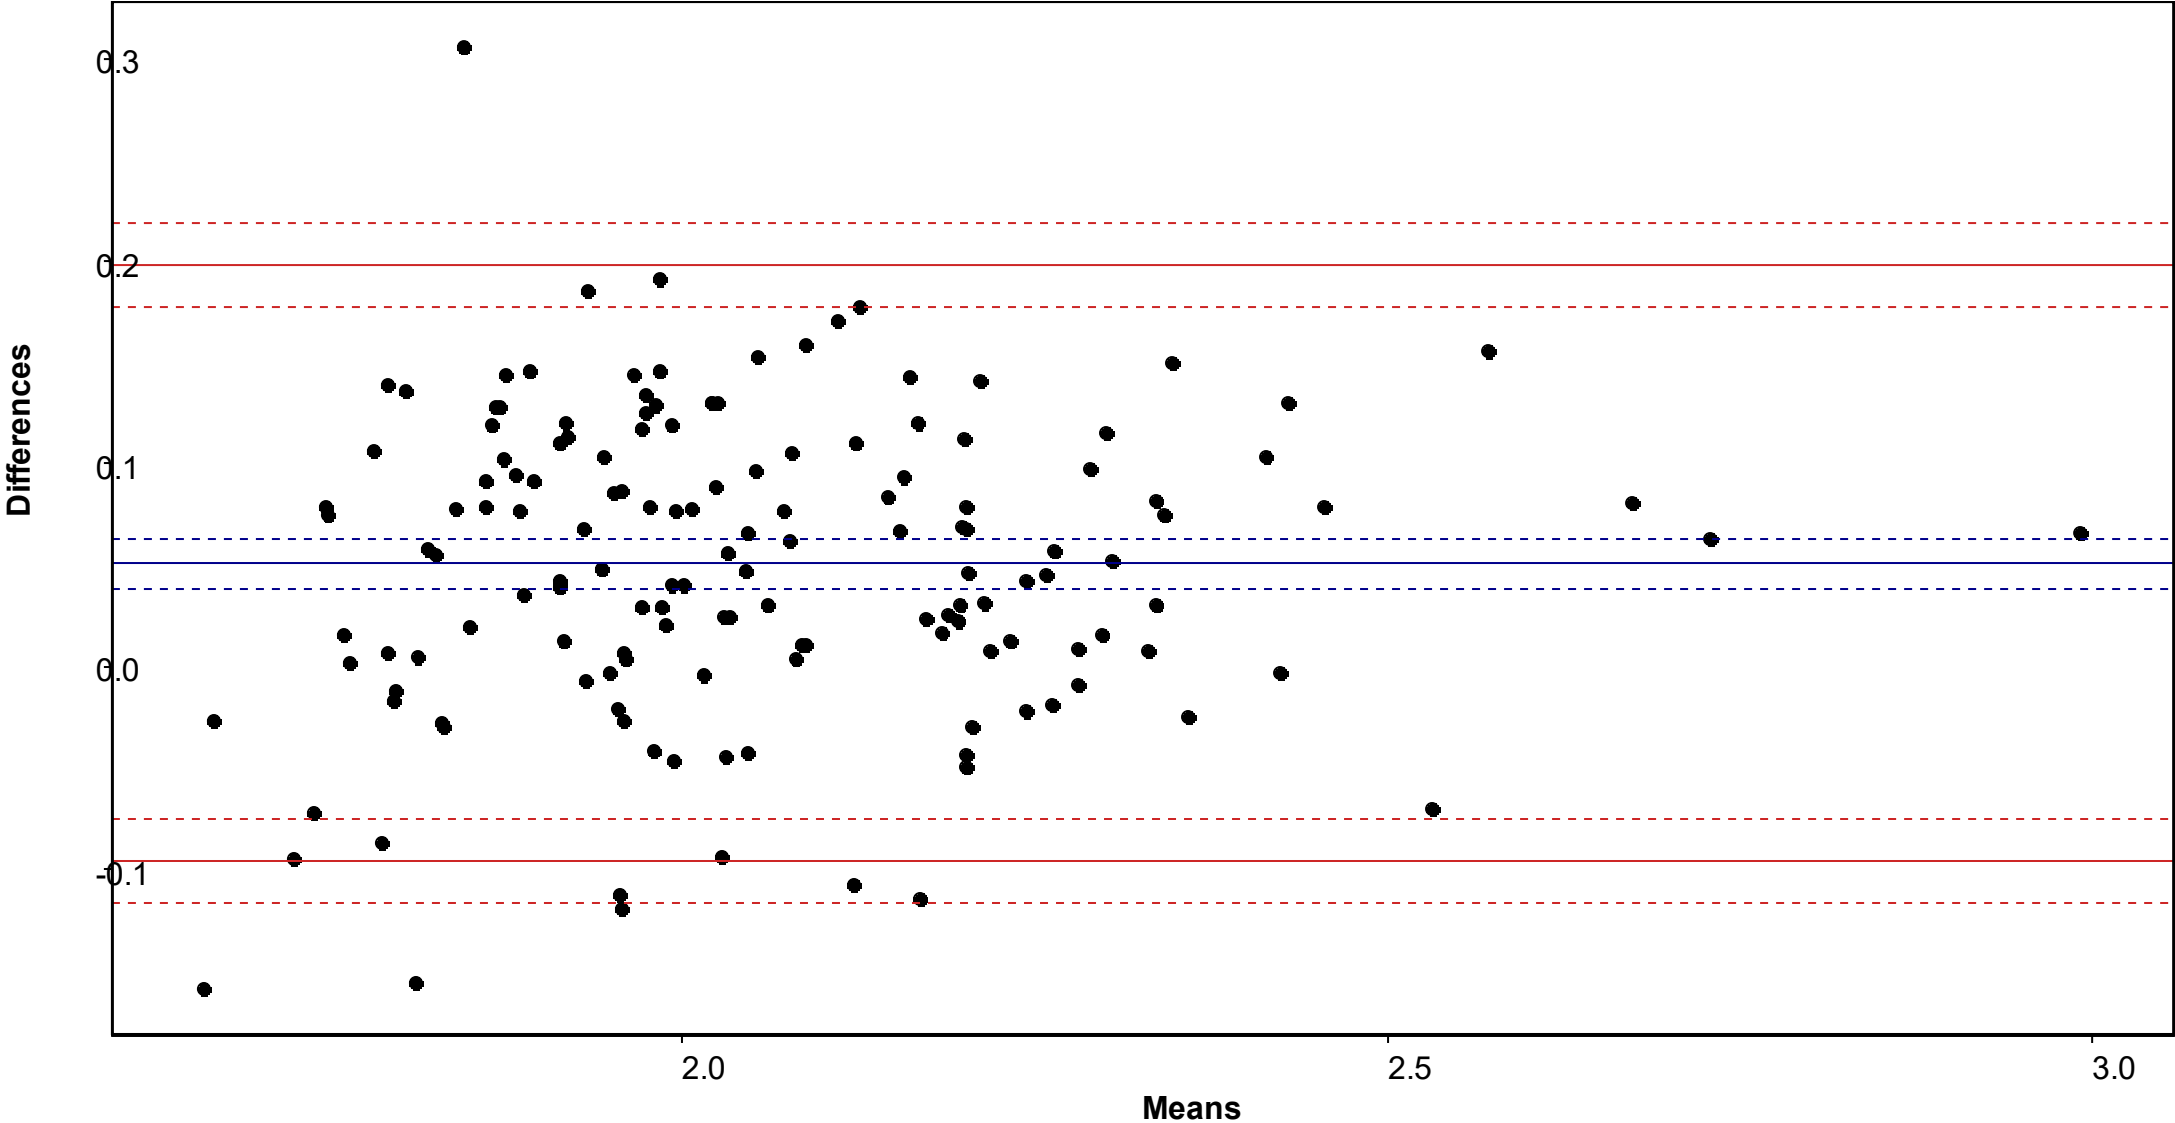

D-dimer  
TAMC healthy controls [supervised in-clinic collection]  
Matched Venous serum and Tasso SST serum [n=183] - T-test p = 6.3e-11

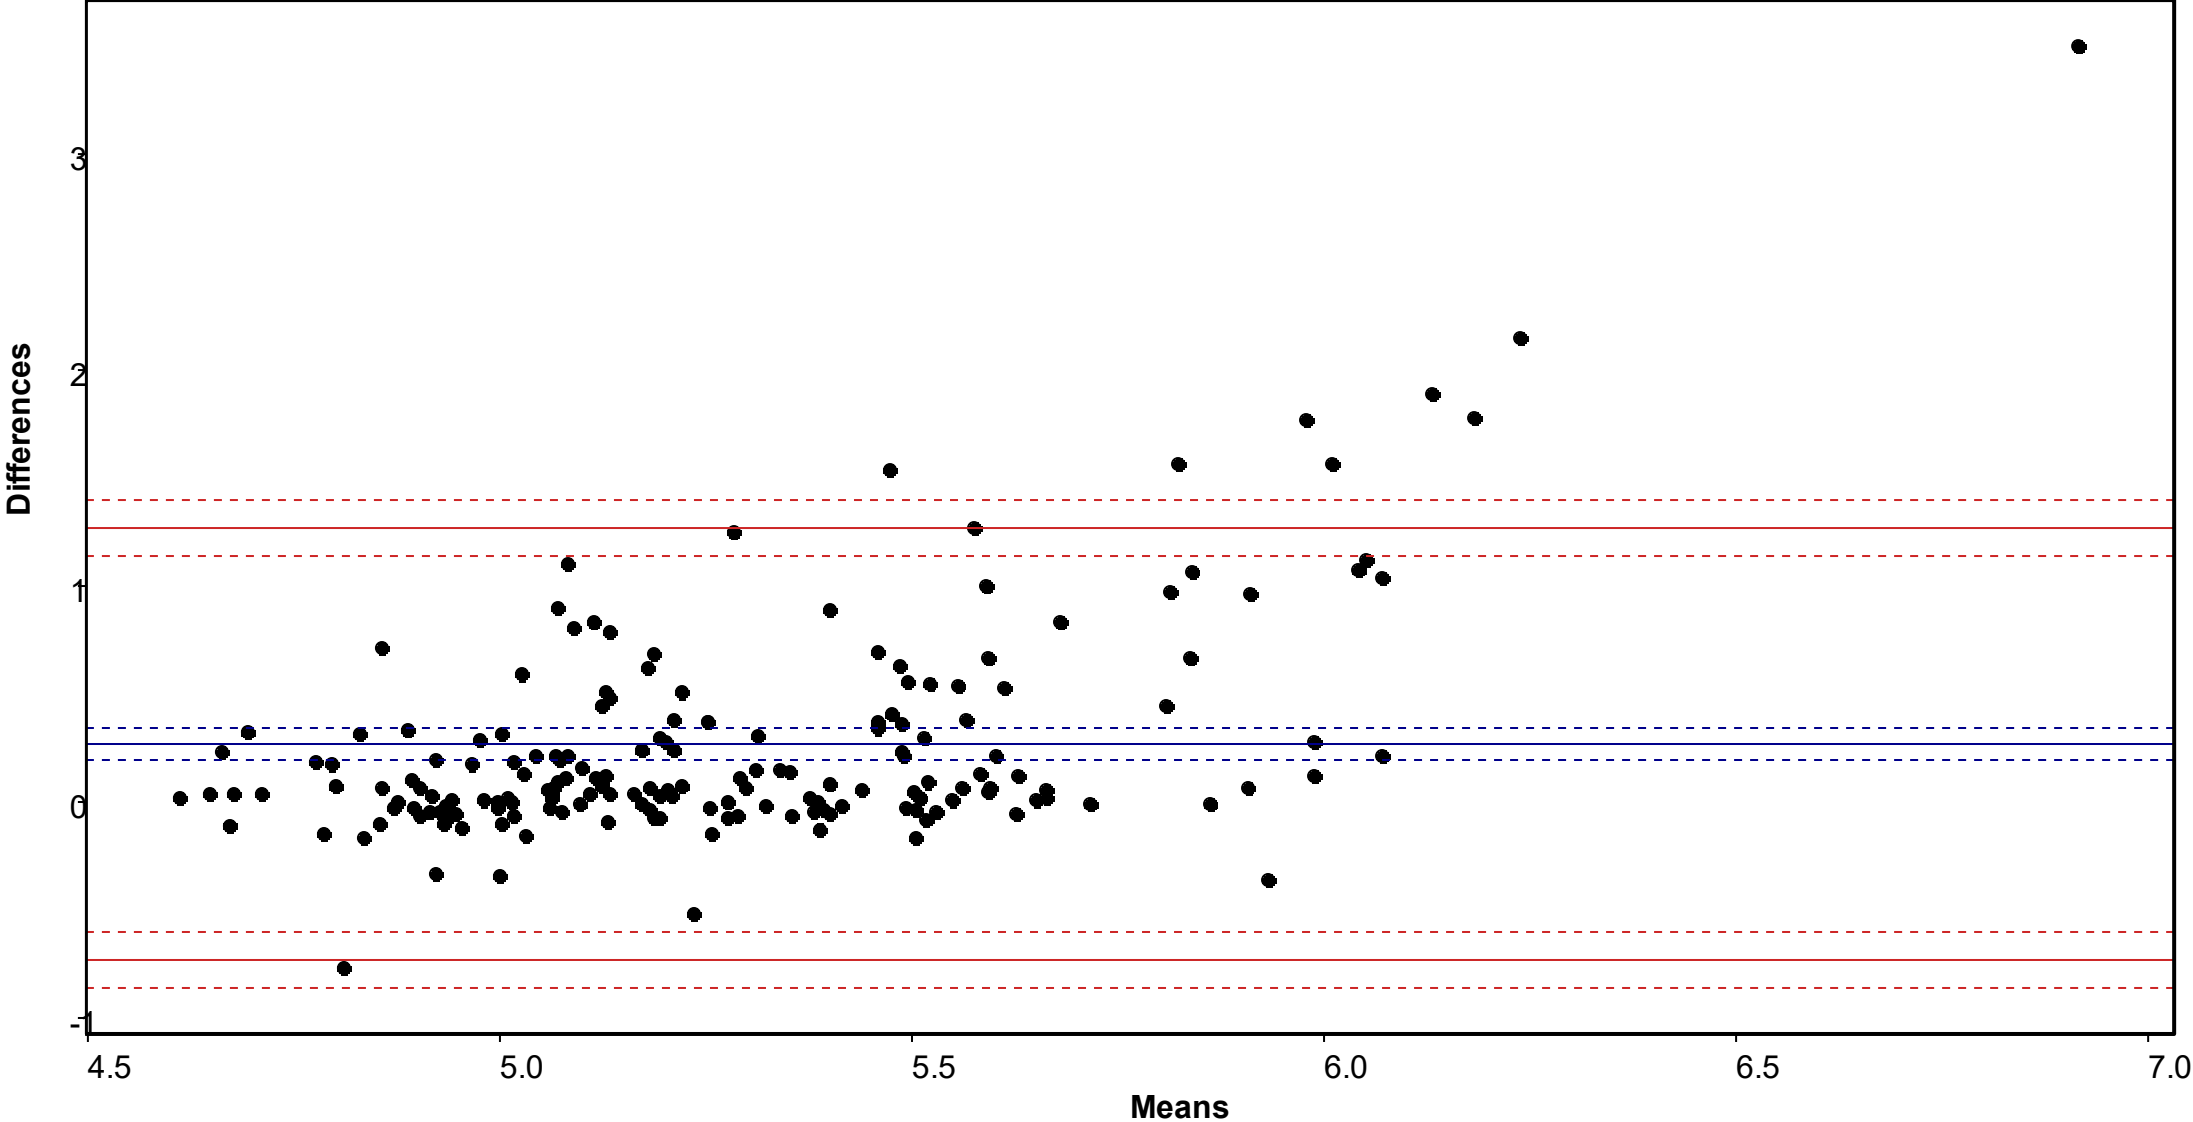

**Ferritin**  
**TAMC healthy controls [supervised in-clinic collection]**  
**Matched Venous serum and Tasso SST serum [n=183] - T-test p = 1.74e-21**

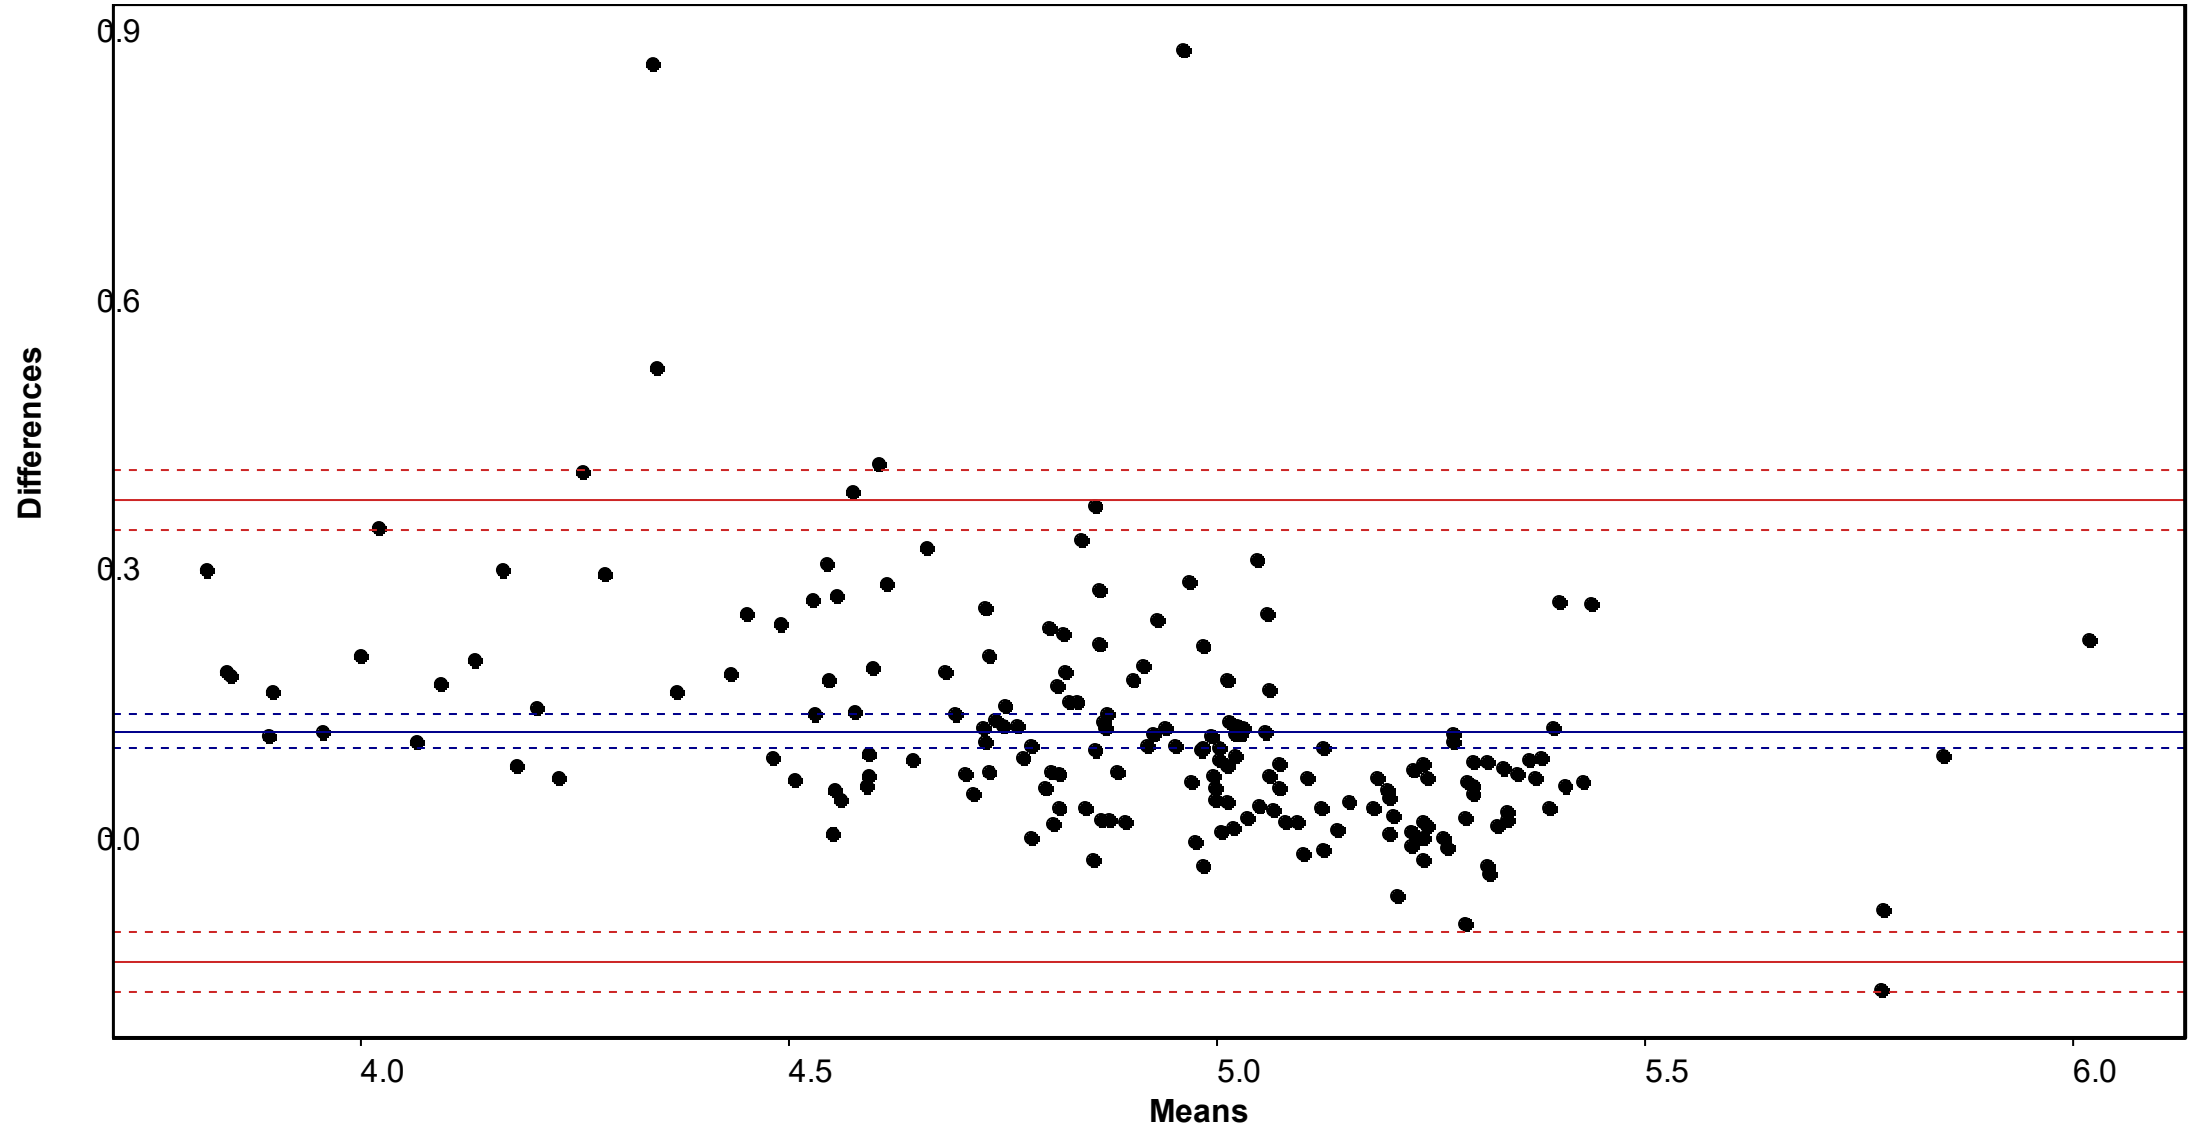

# ICAM-1

TAMC healthy controls [supervised in-clinic collection]

Matched Venous serum and Tasso SST serum [n=183] - T-test p = 5.84e-06

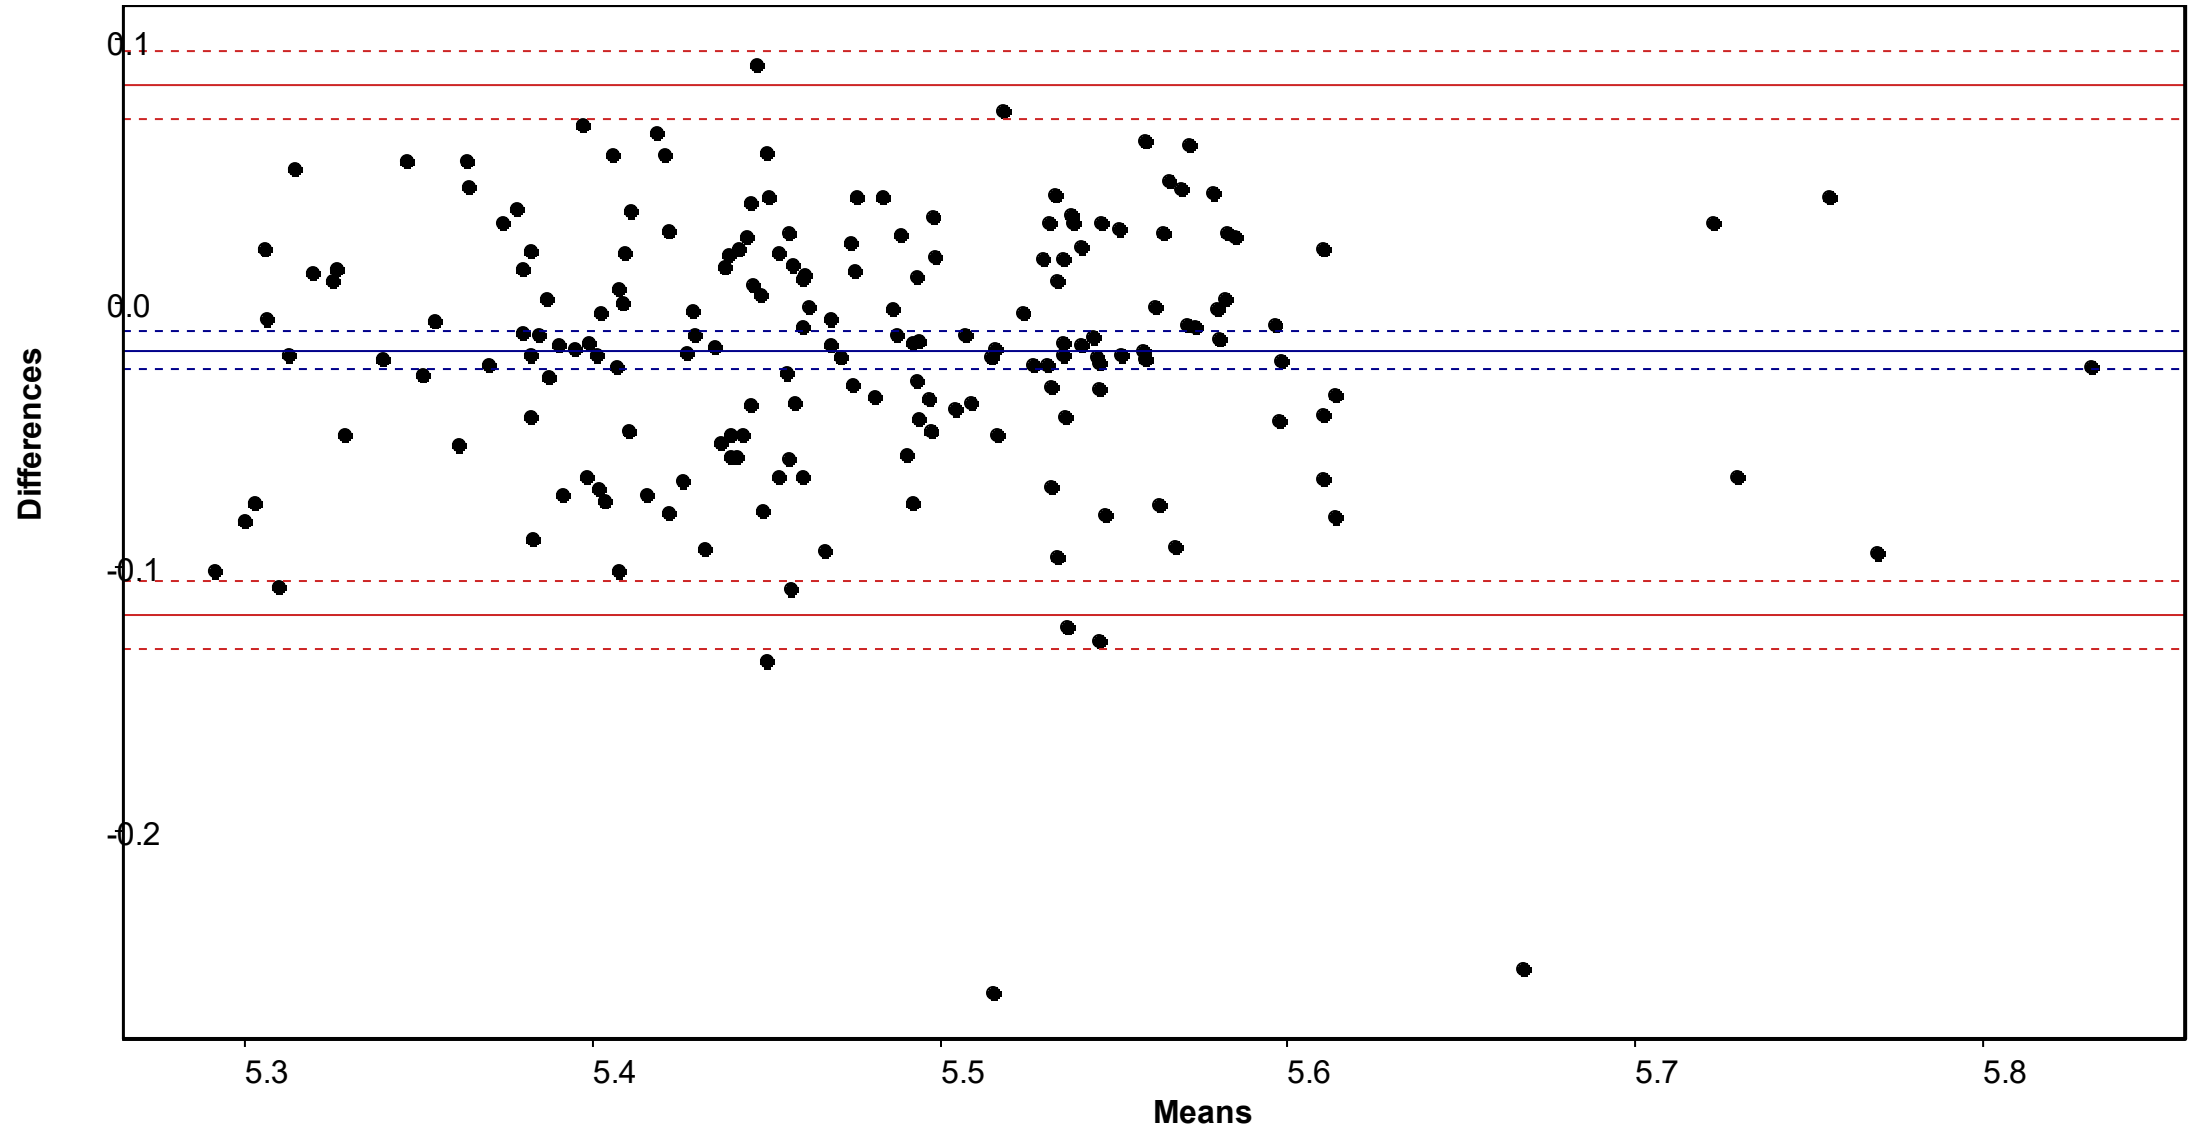

**IL-1B**

**TAMC healthy controls [supervised in-clinic collection]**

**Matched Venous serum and Tasso SST serum [n=24] - T-test p = 0.622**

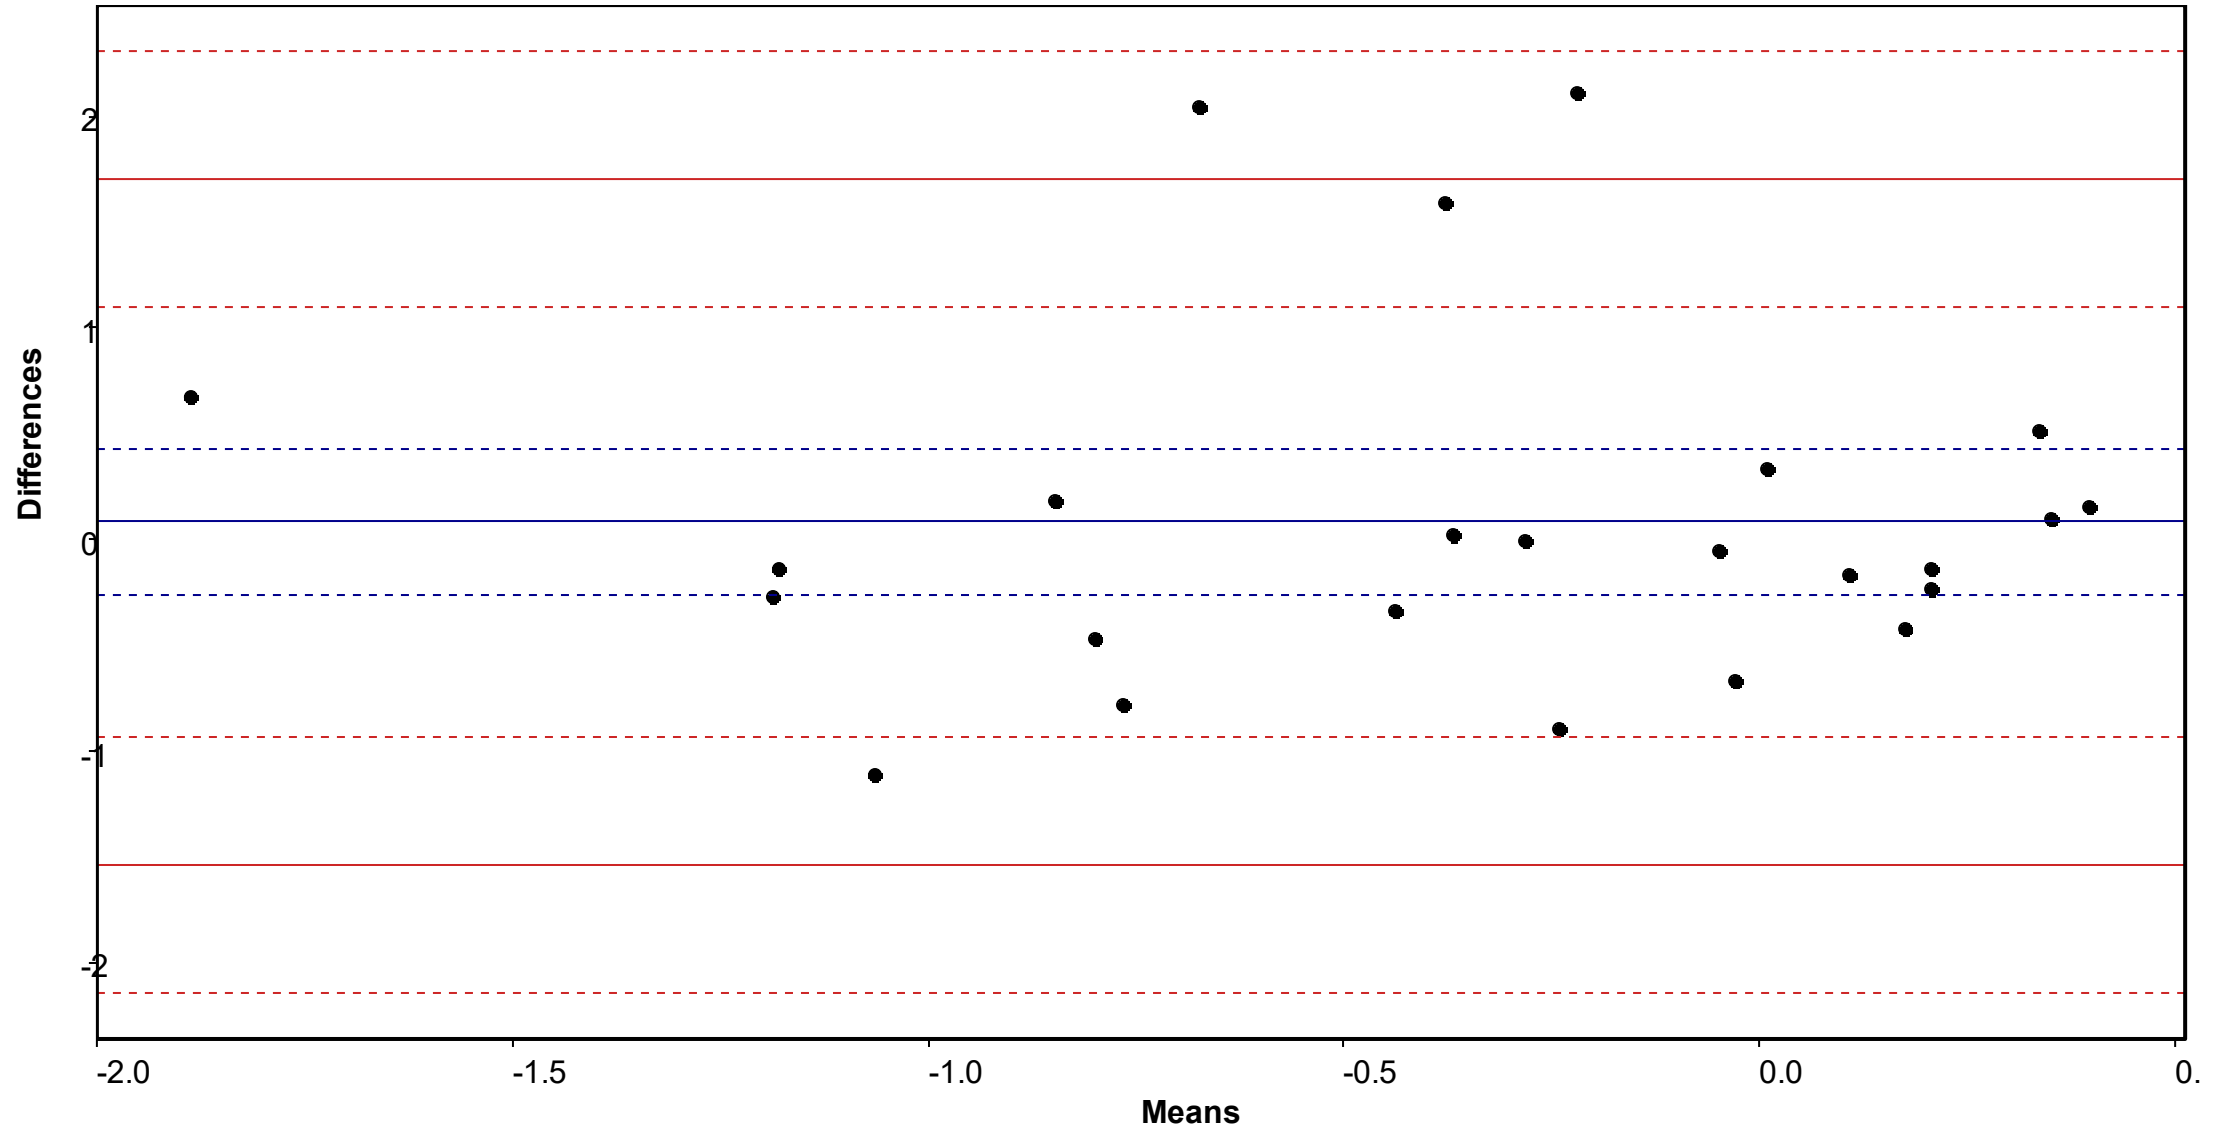

**IL-1Ra**  
**TAMC healthy controls [supervised in-clinic collection]**  
**Matched Venous serum and Tasso SST serum [n=183] - T-test p = 1.72e-48**

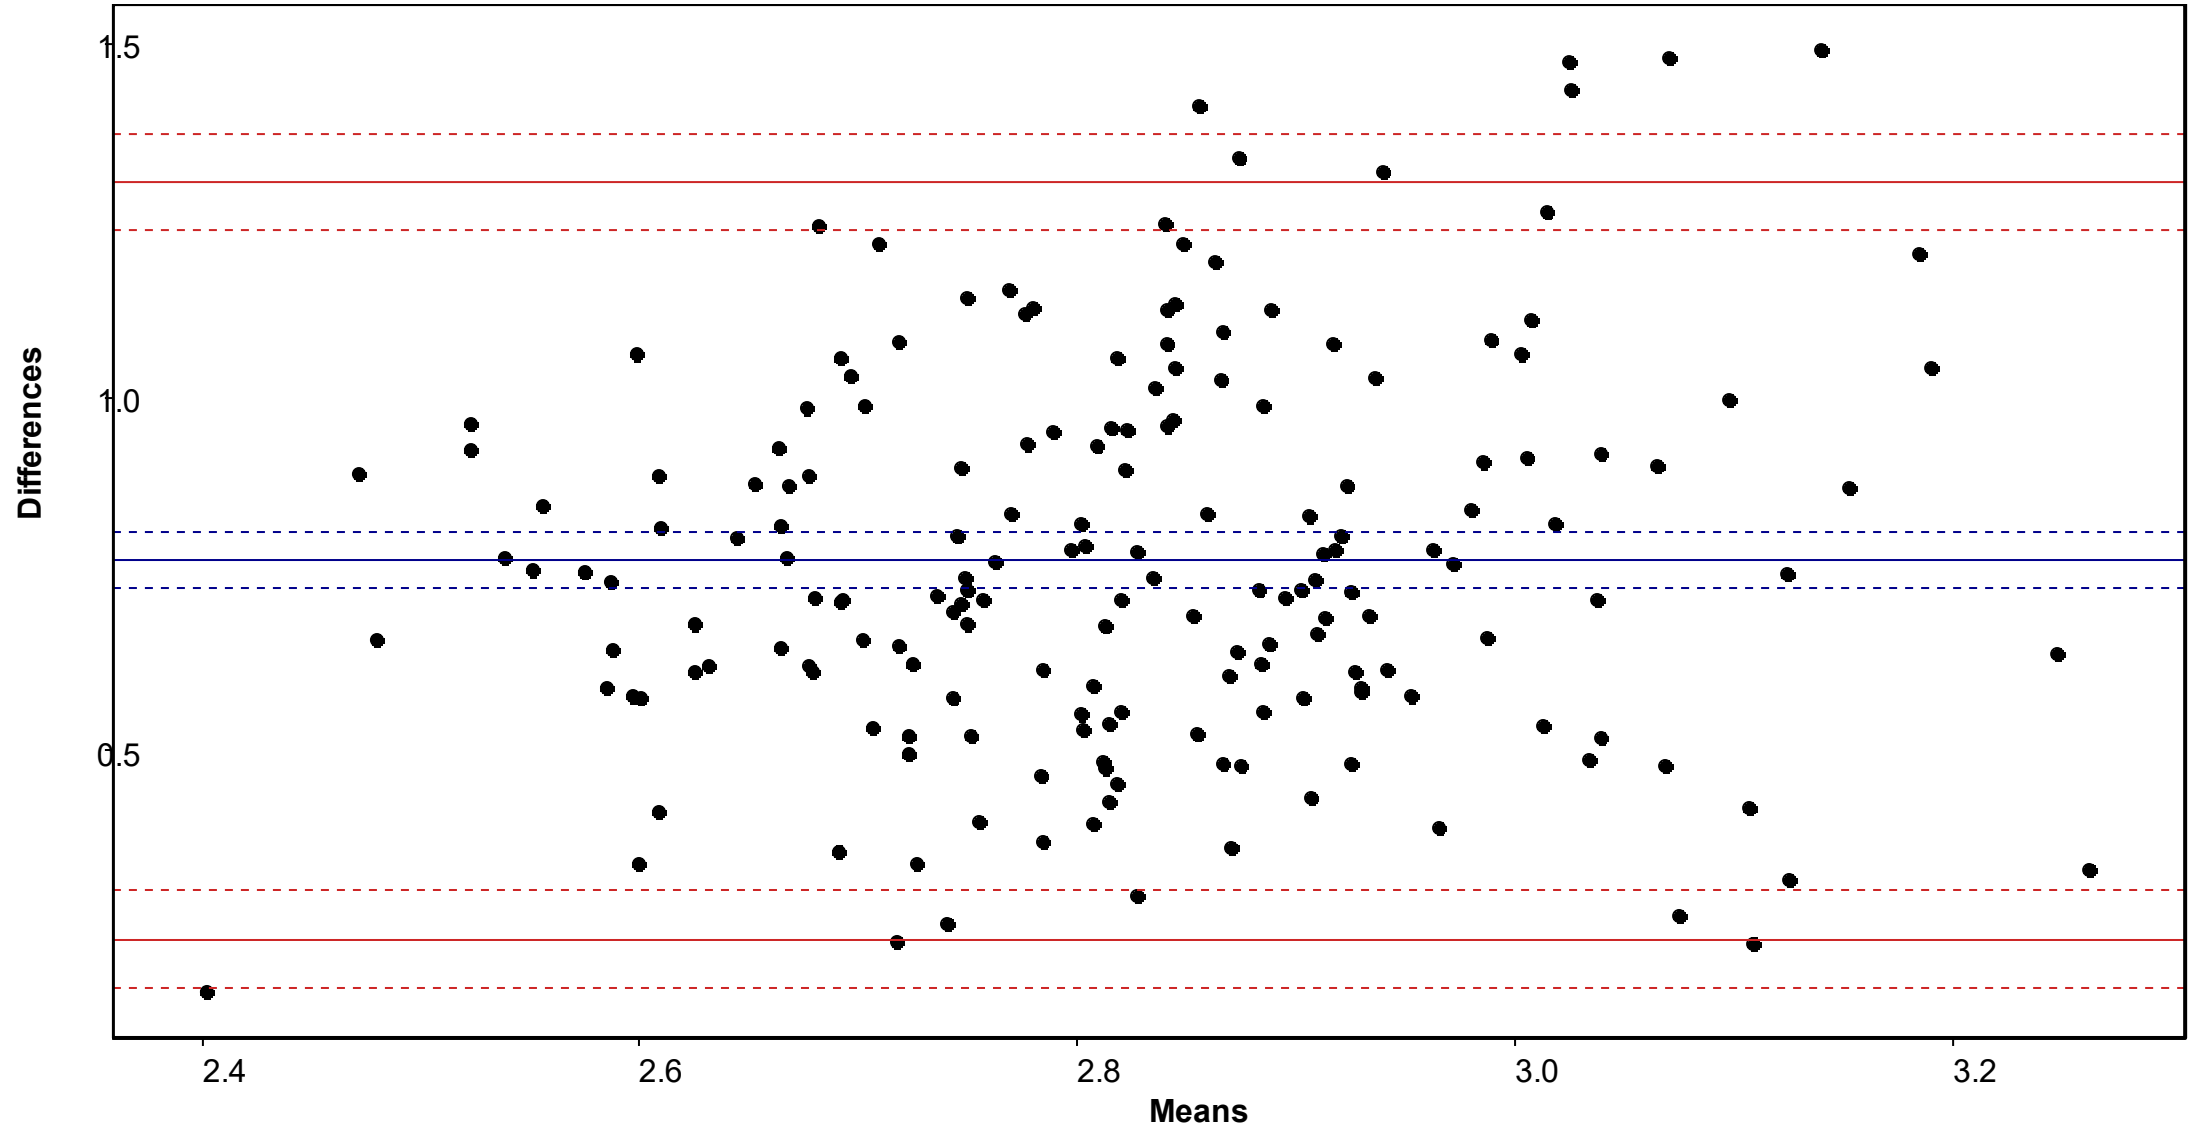



**IL-5**  
**TAMC healthy controls [supervised in-clinic collection]**  
**Matched Venous serum and Tasso SST serum [n=152] - T-test p = 0.918**

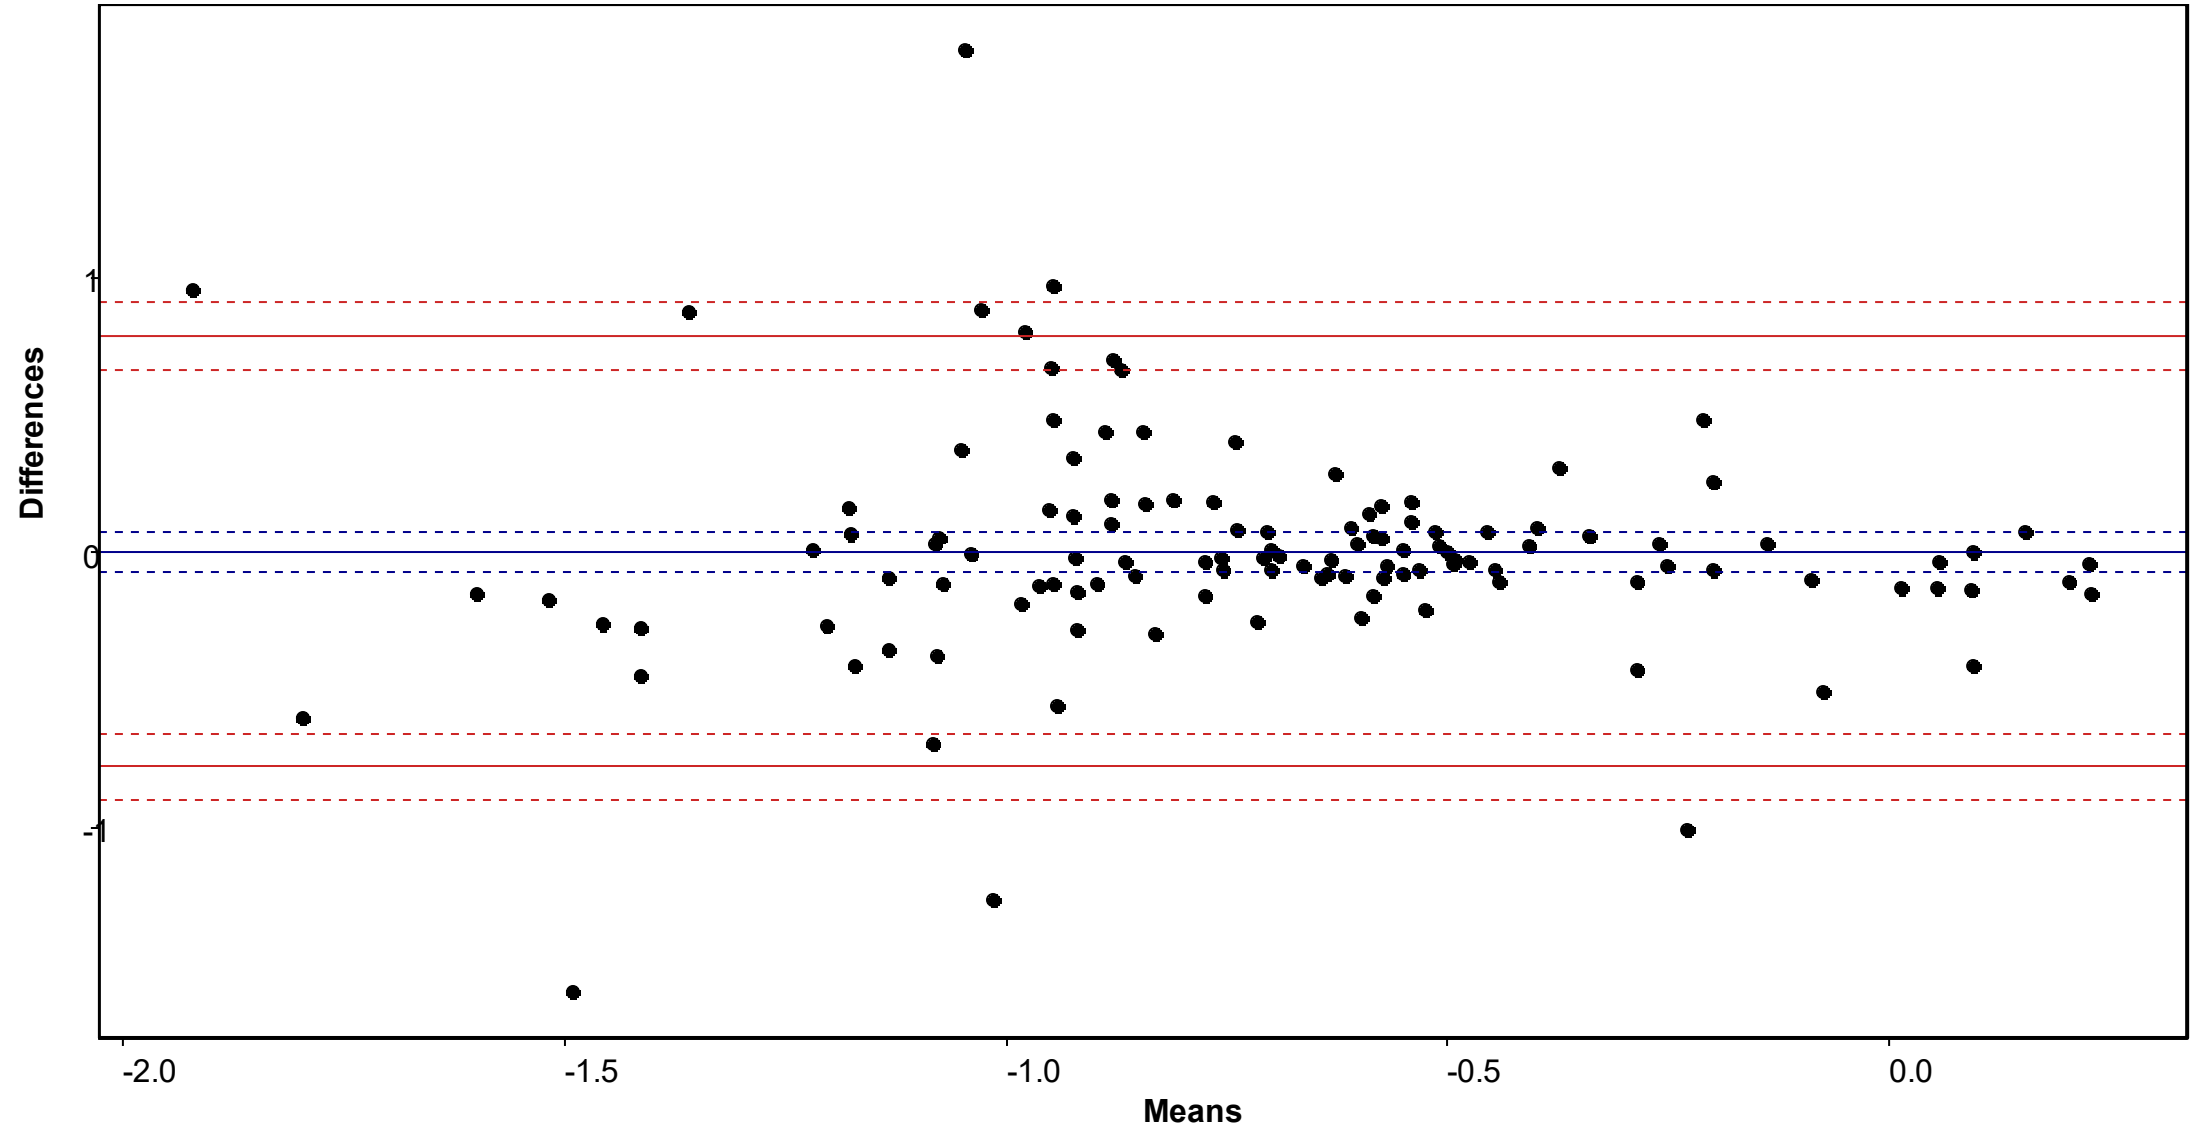

**IL-6**

**TAMC healthy controls [supervised in-clinic collection]**

**Matched Venous serum and Tasso SST serum [n=183] - T-test p = 0.00573**

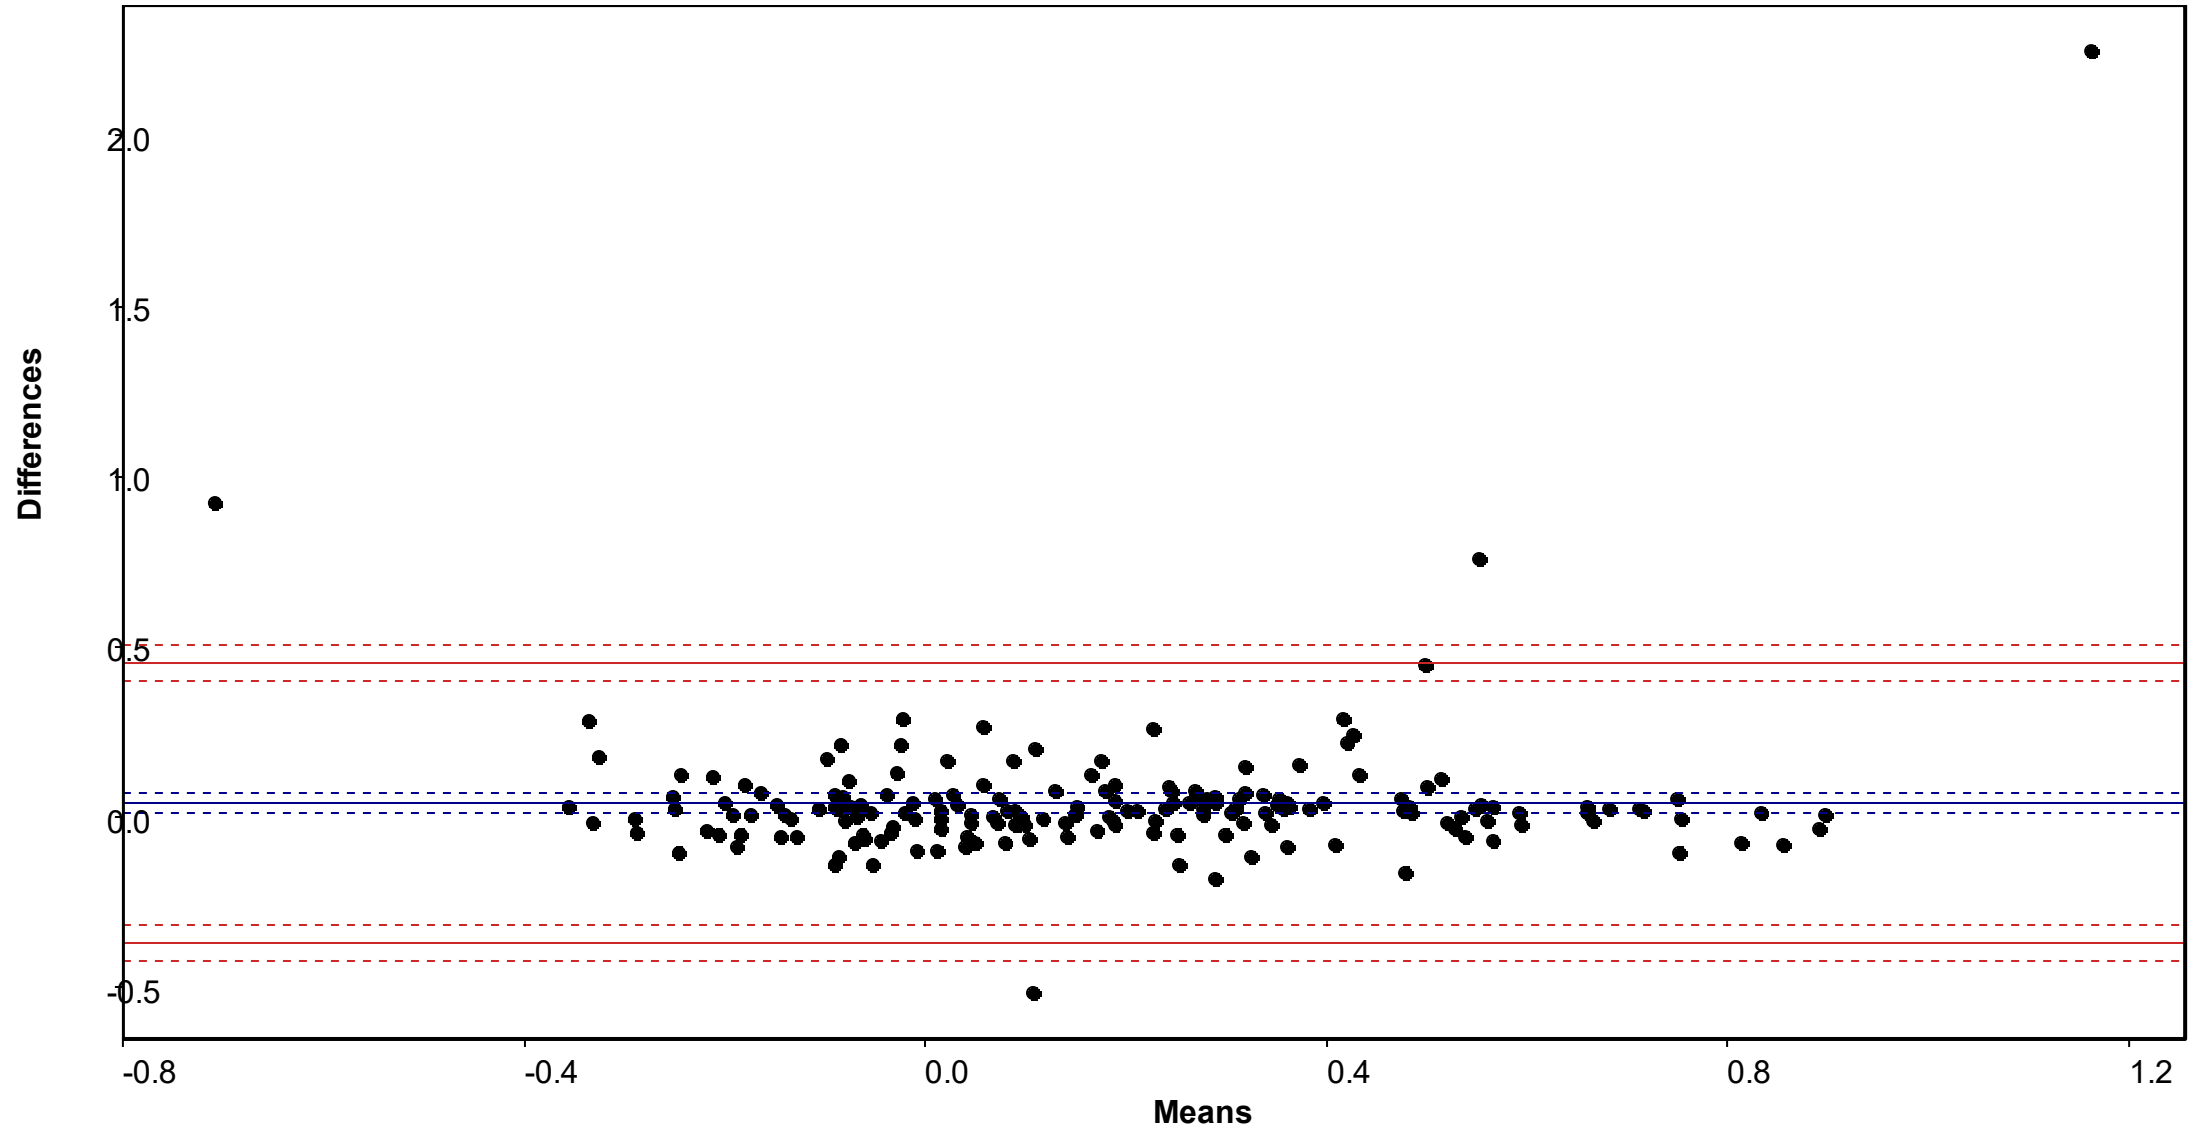

**IL-6Ra**

**TAMC healthy controls [supervised in-clinic collection]**

**Matched Venous serum and Tasso SST serum [n=183] - T-test p = 0.000169**

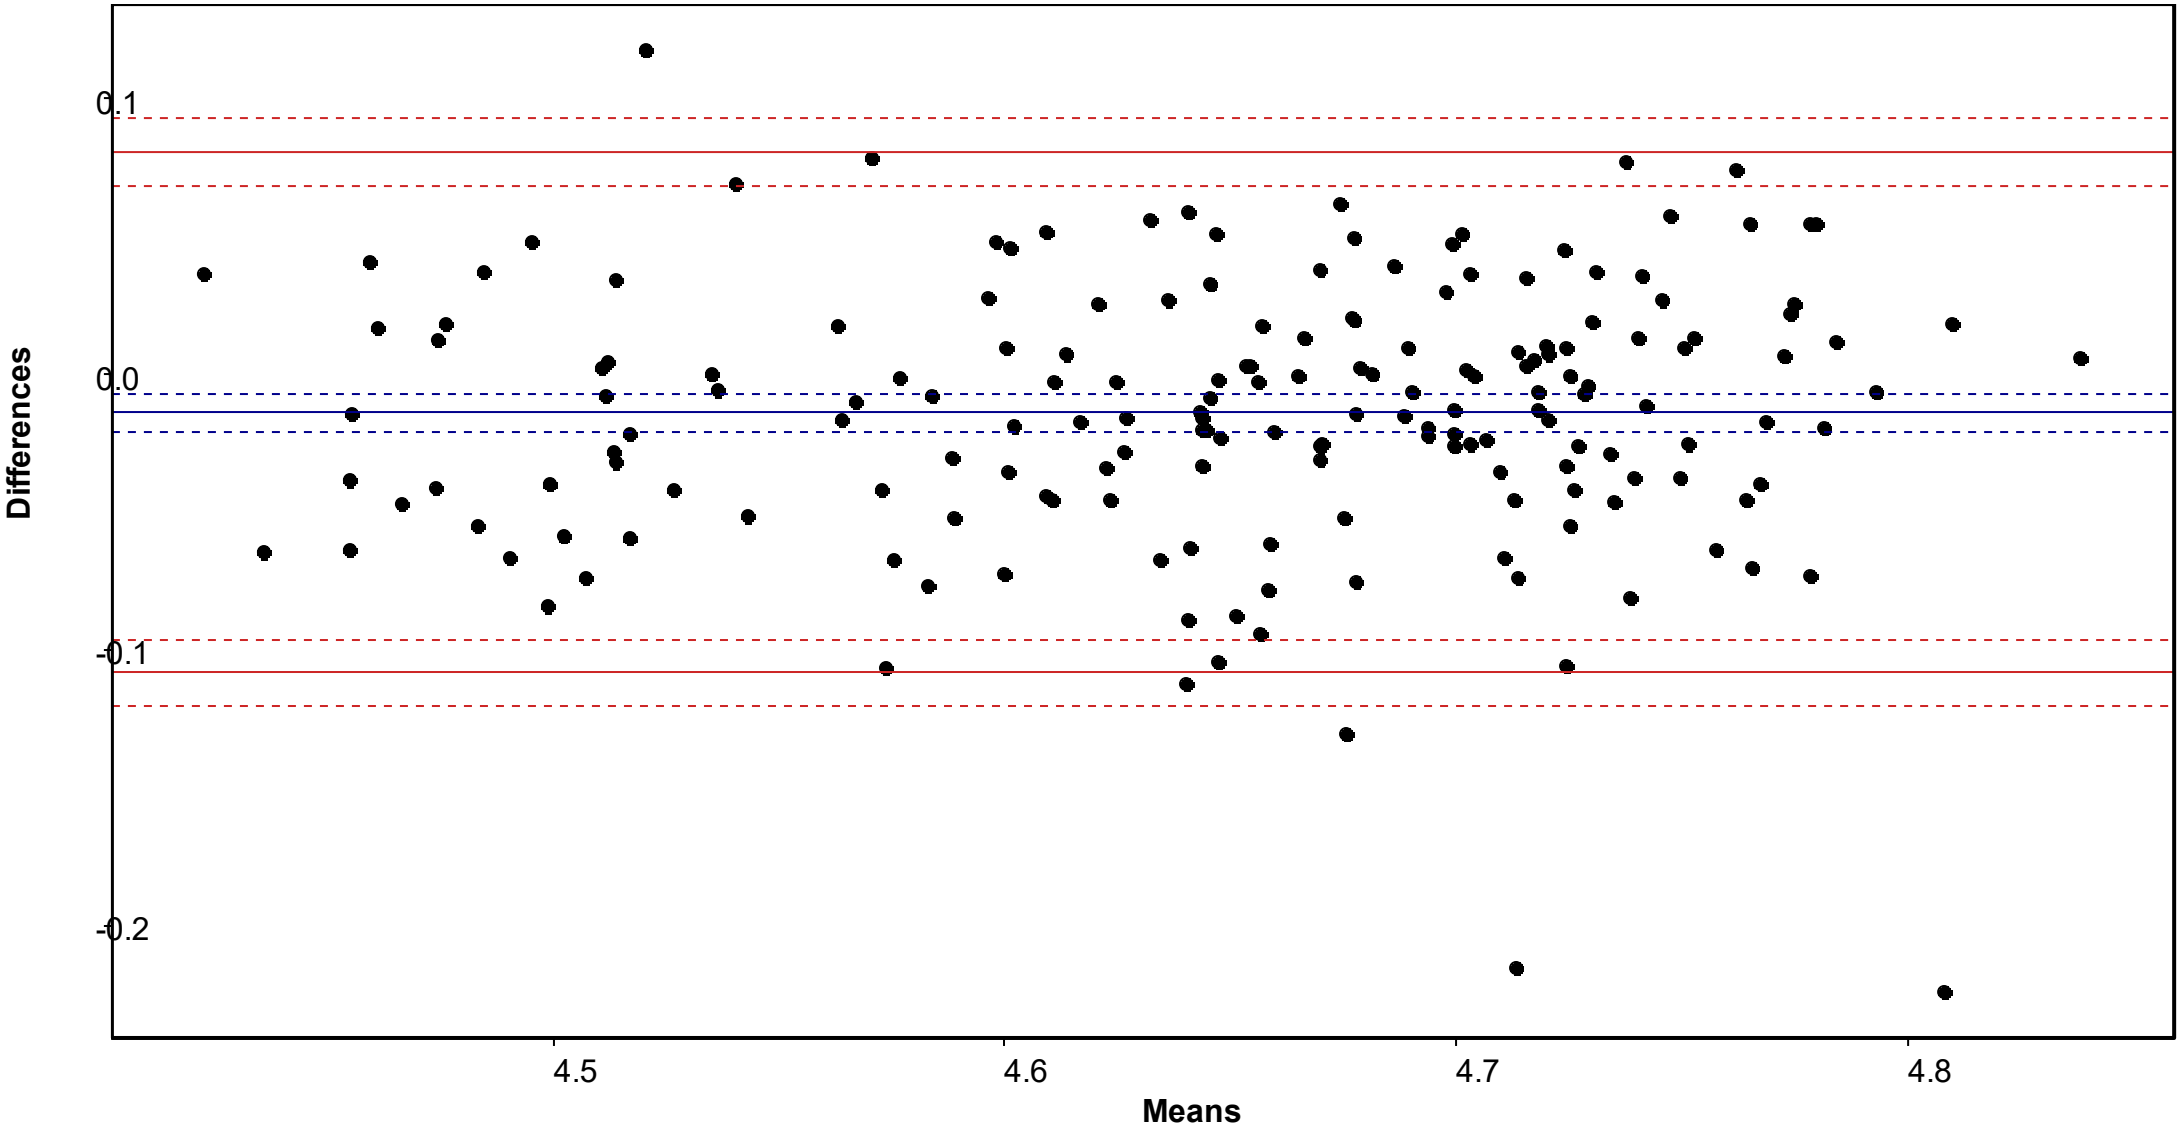

**IL-18BPa**  
**TAMC healthy controls [supervised in-clinic collection]**  
**Matched Venous serum and Tasso SST serum [n=152] - T-test p = 4.26e-05**

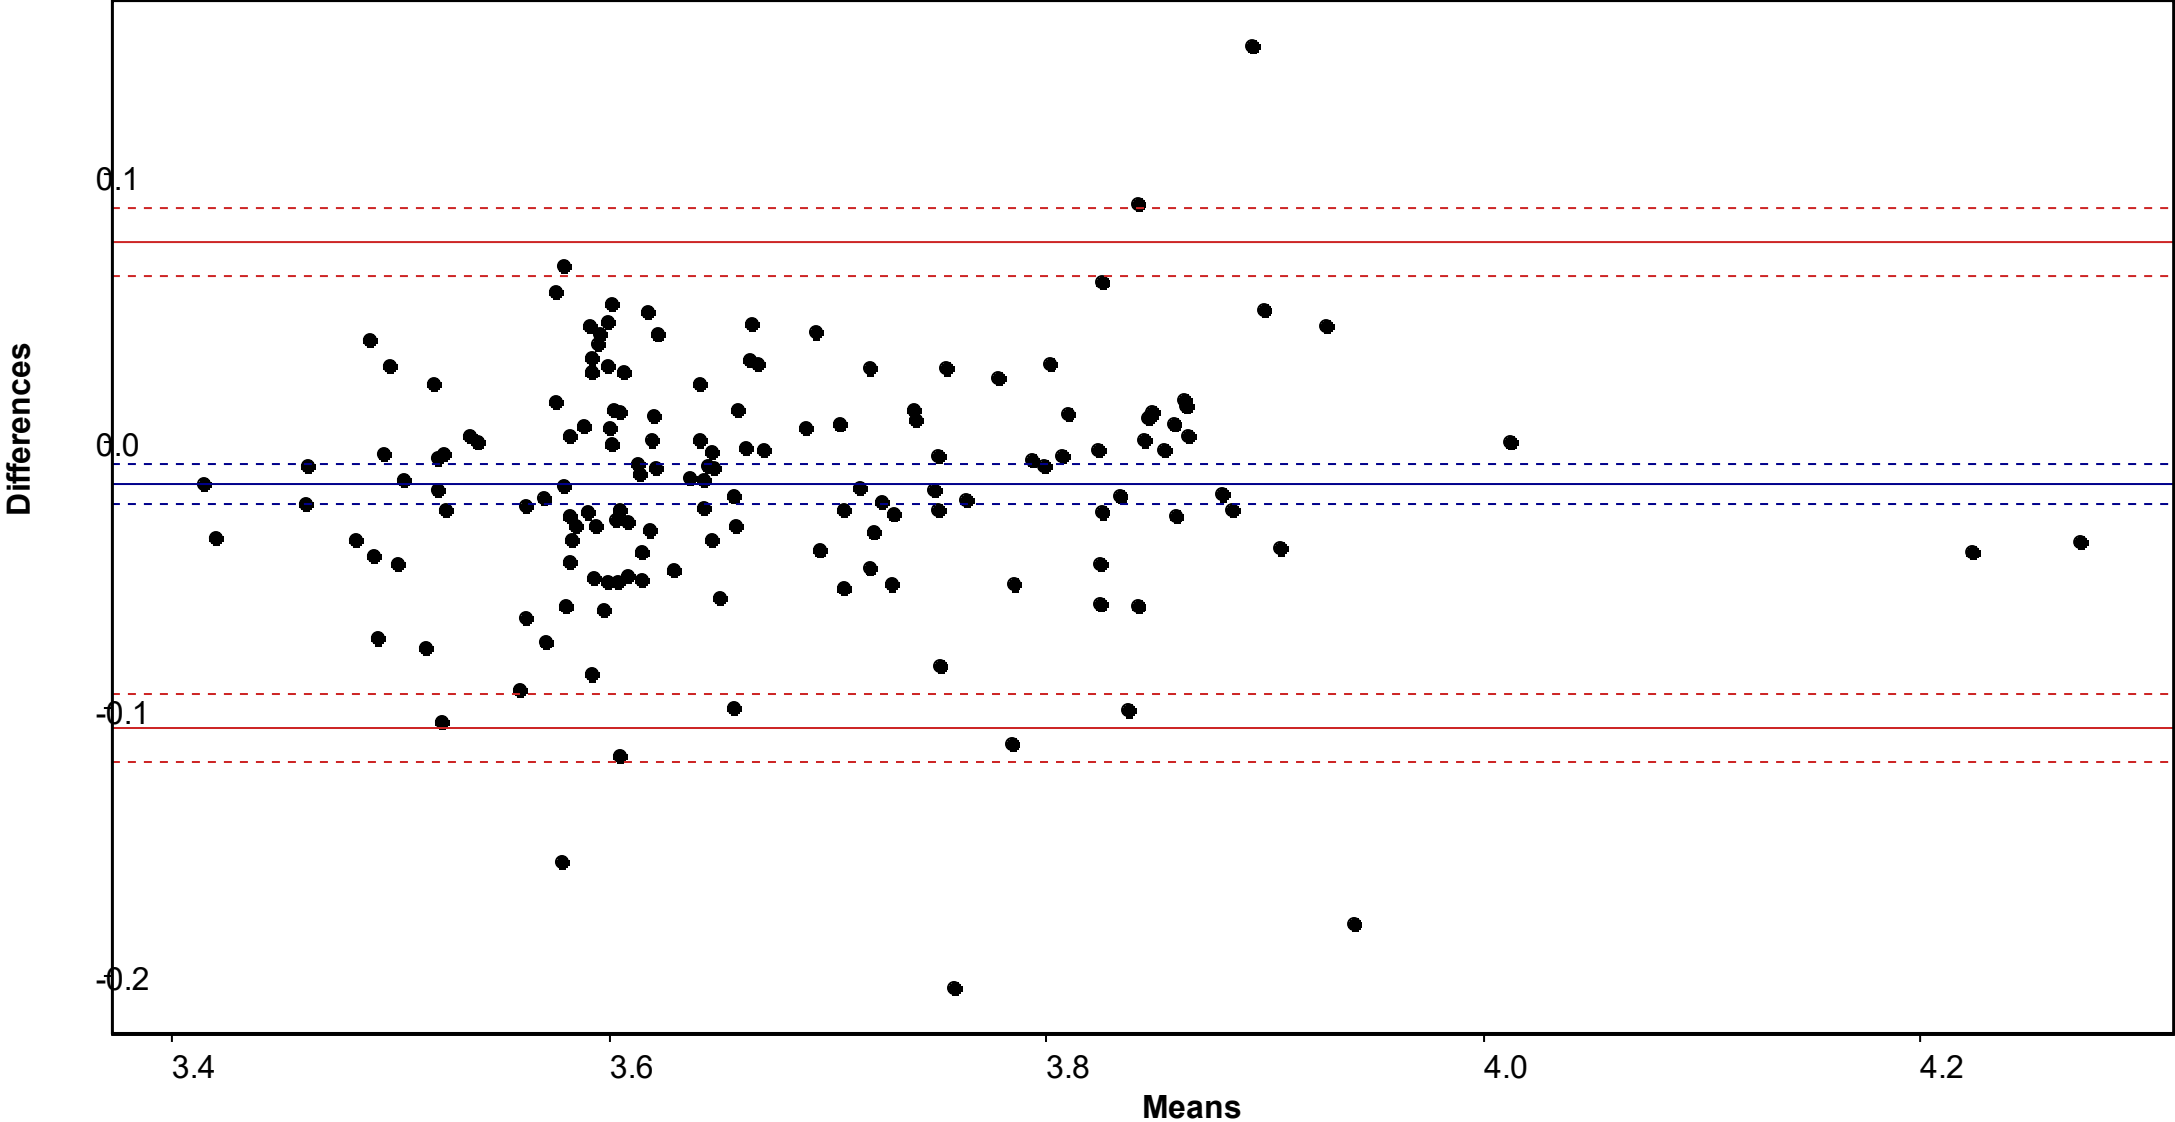

LCN

TAMC healthy controls [supervised in-clinic collection]

Matched Venous serum and Tasso SST serum [n=183] - T-test p = 0.0761

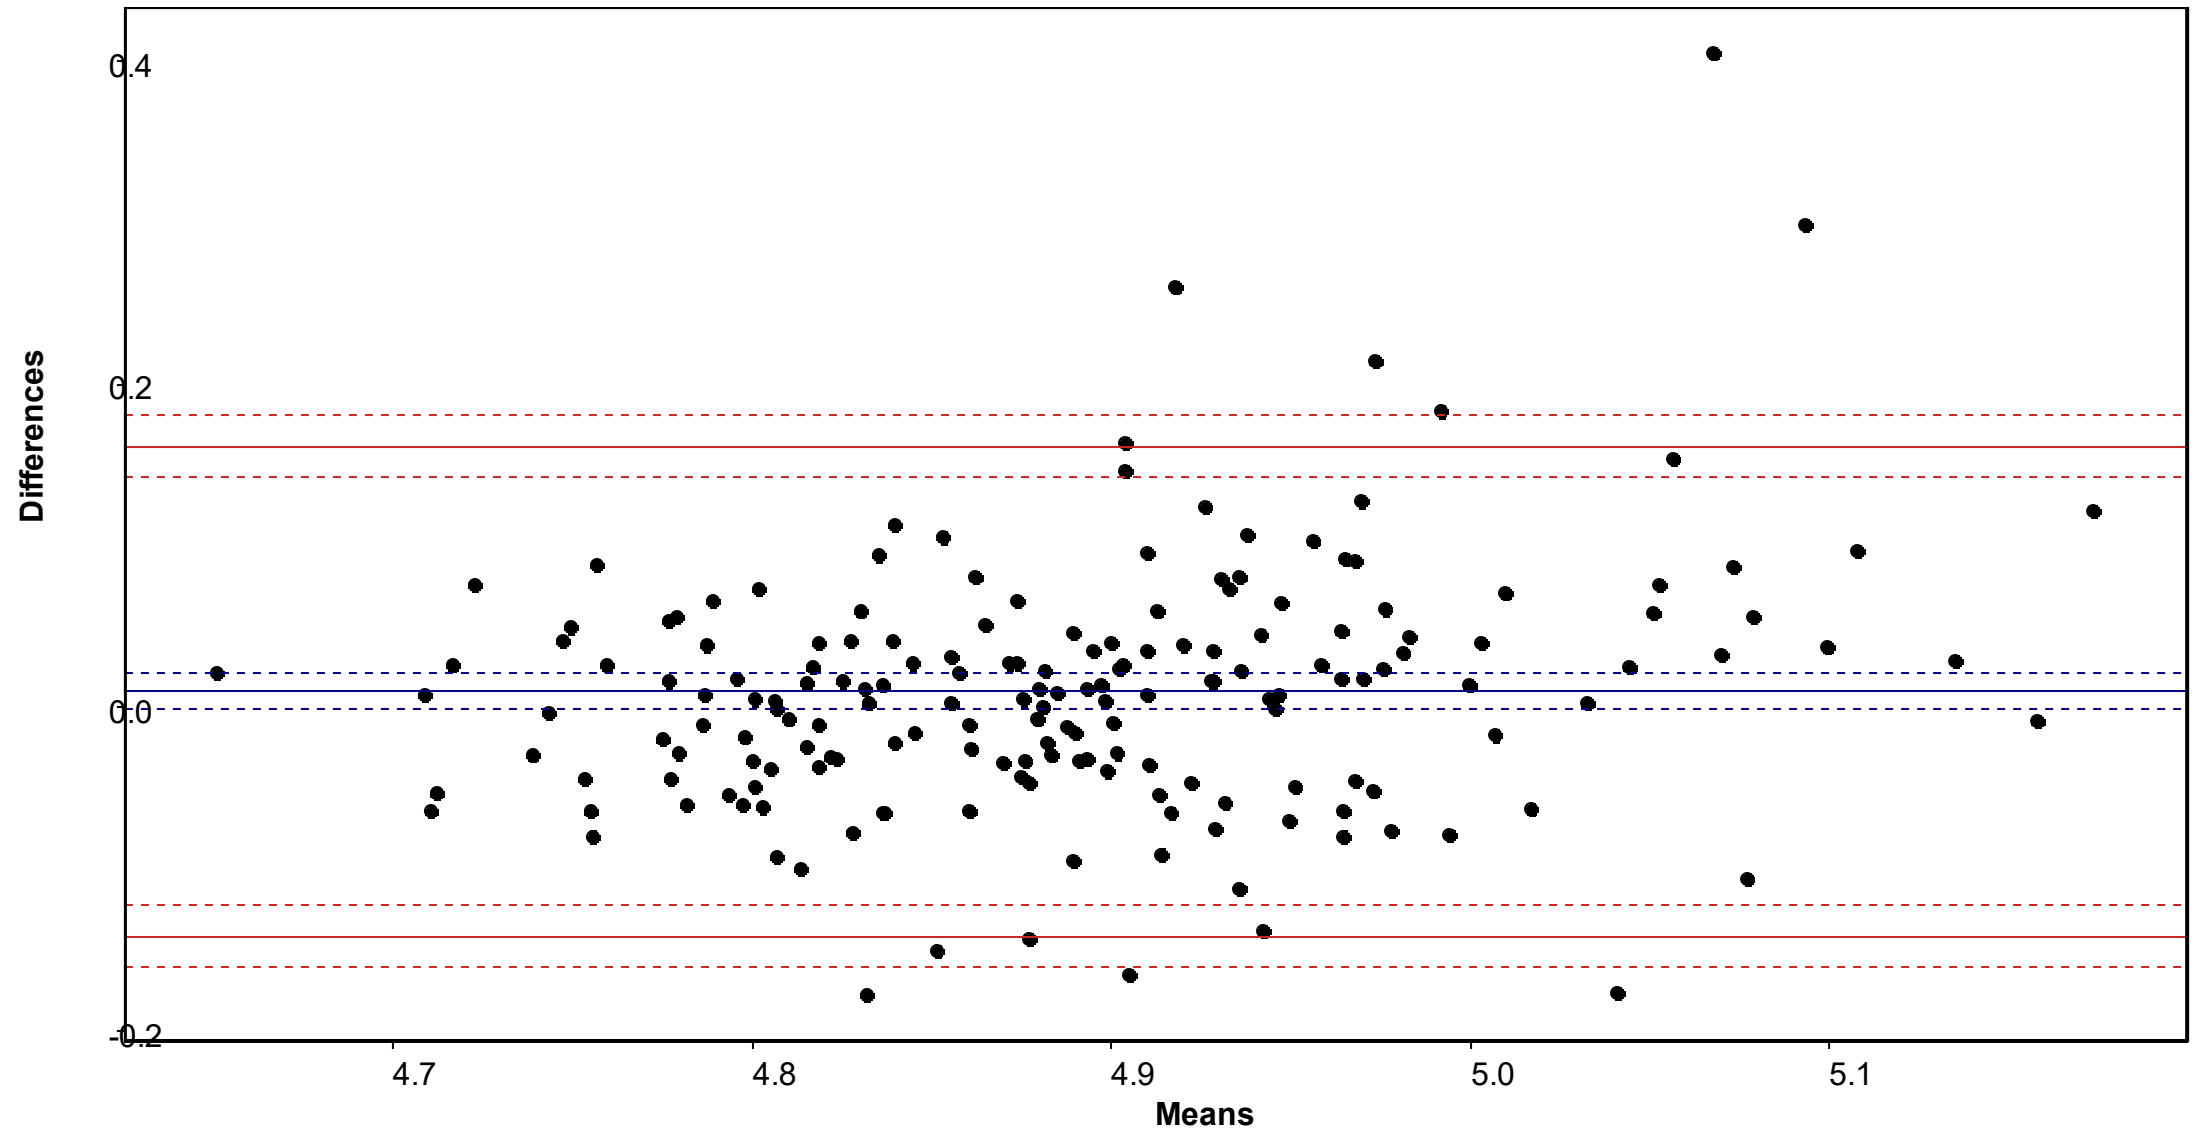

**PCT**  
**TAMC healthy controls [supervised in-clinic collection]**  
**Matched Venous serum and Tasso SST serum [n=183] - T-test p = 1.15e-09**

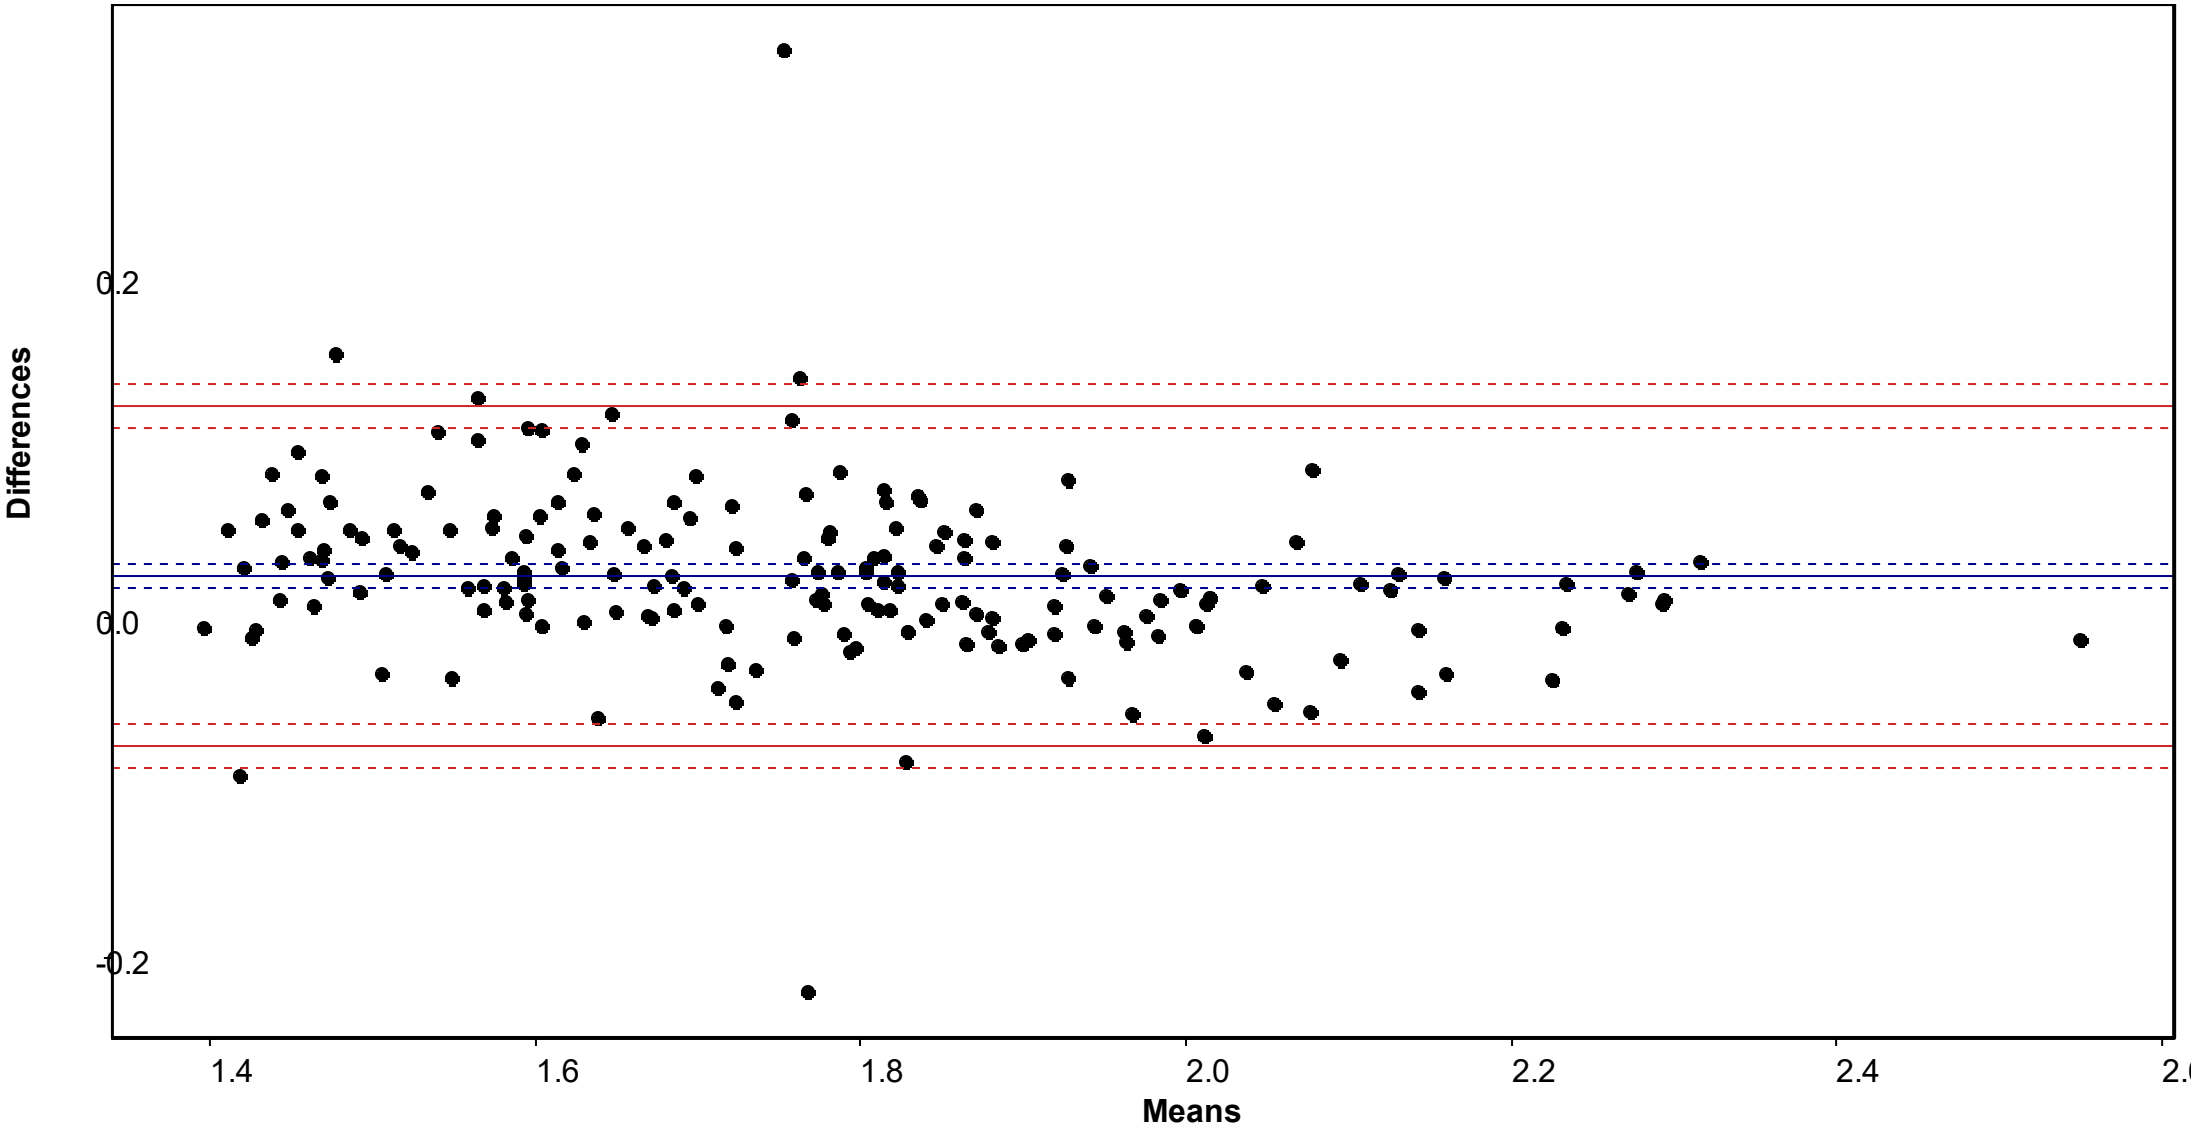

# RAGE

TAMC healthy controls [supervised in-clinic collection]

Matched Venous serum and Tasso SST serum [n=183] - T-test p = 3.66e-05

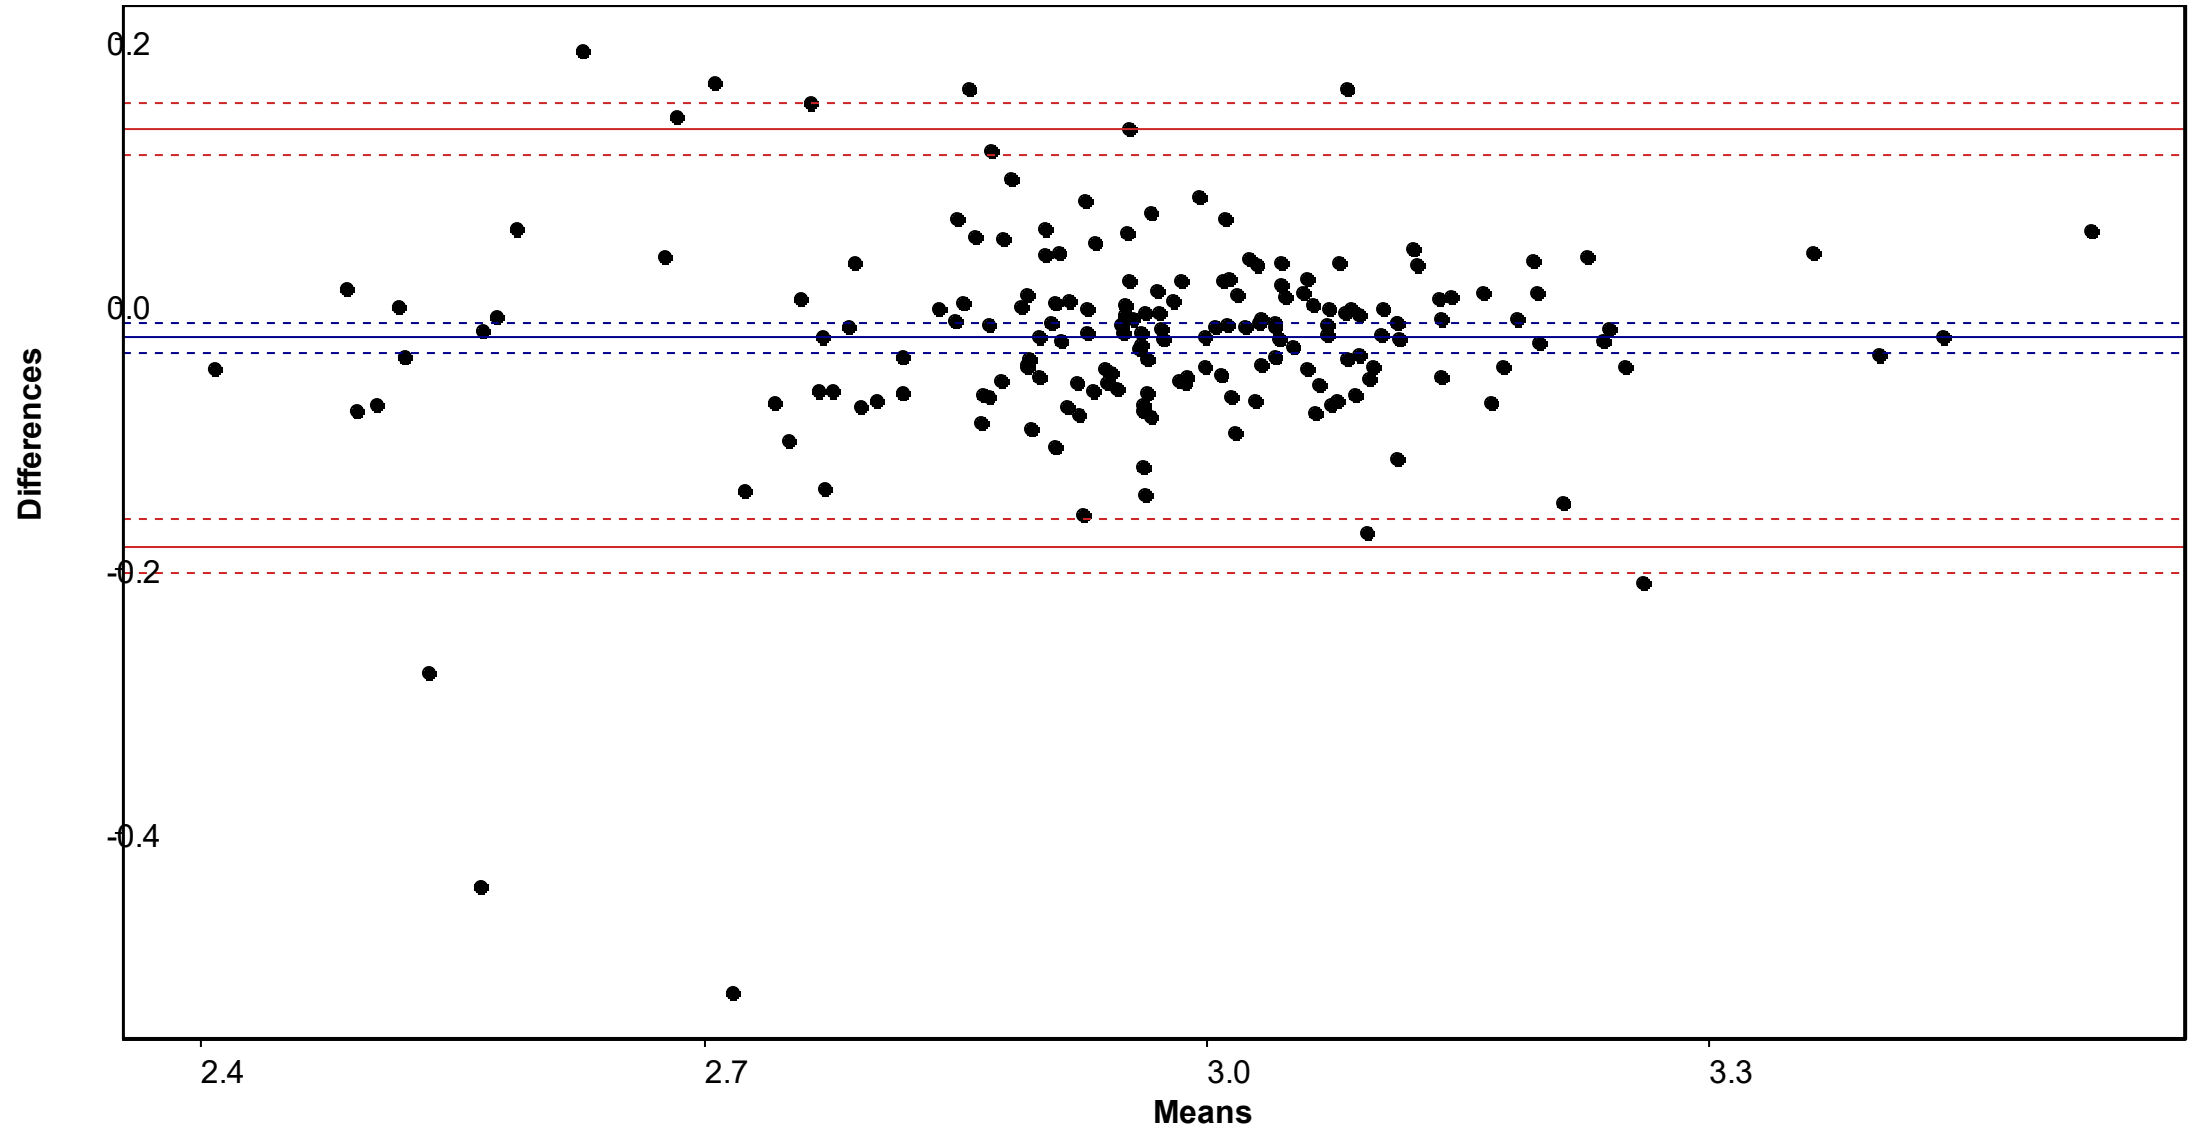

TNF-R1

TAMC healthy controls [supervised in-clinic collection]

Matched Venous serum and Tasso SST serum [n=183] - T-test p = 3.84e-15

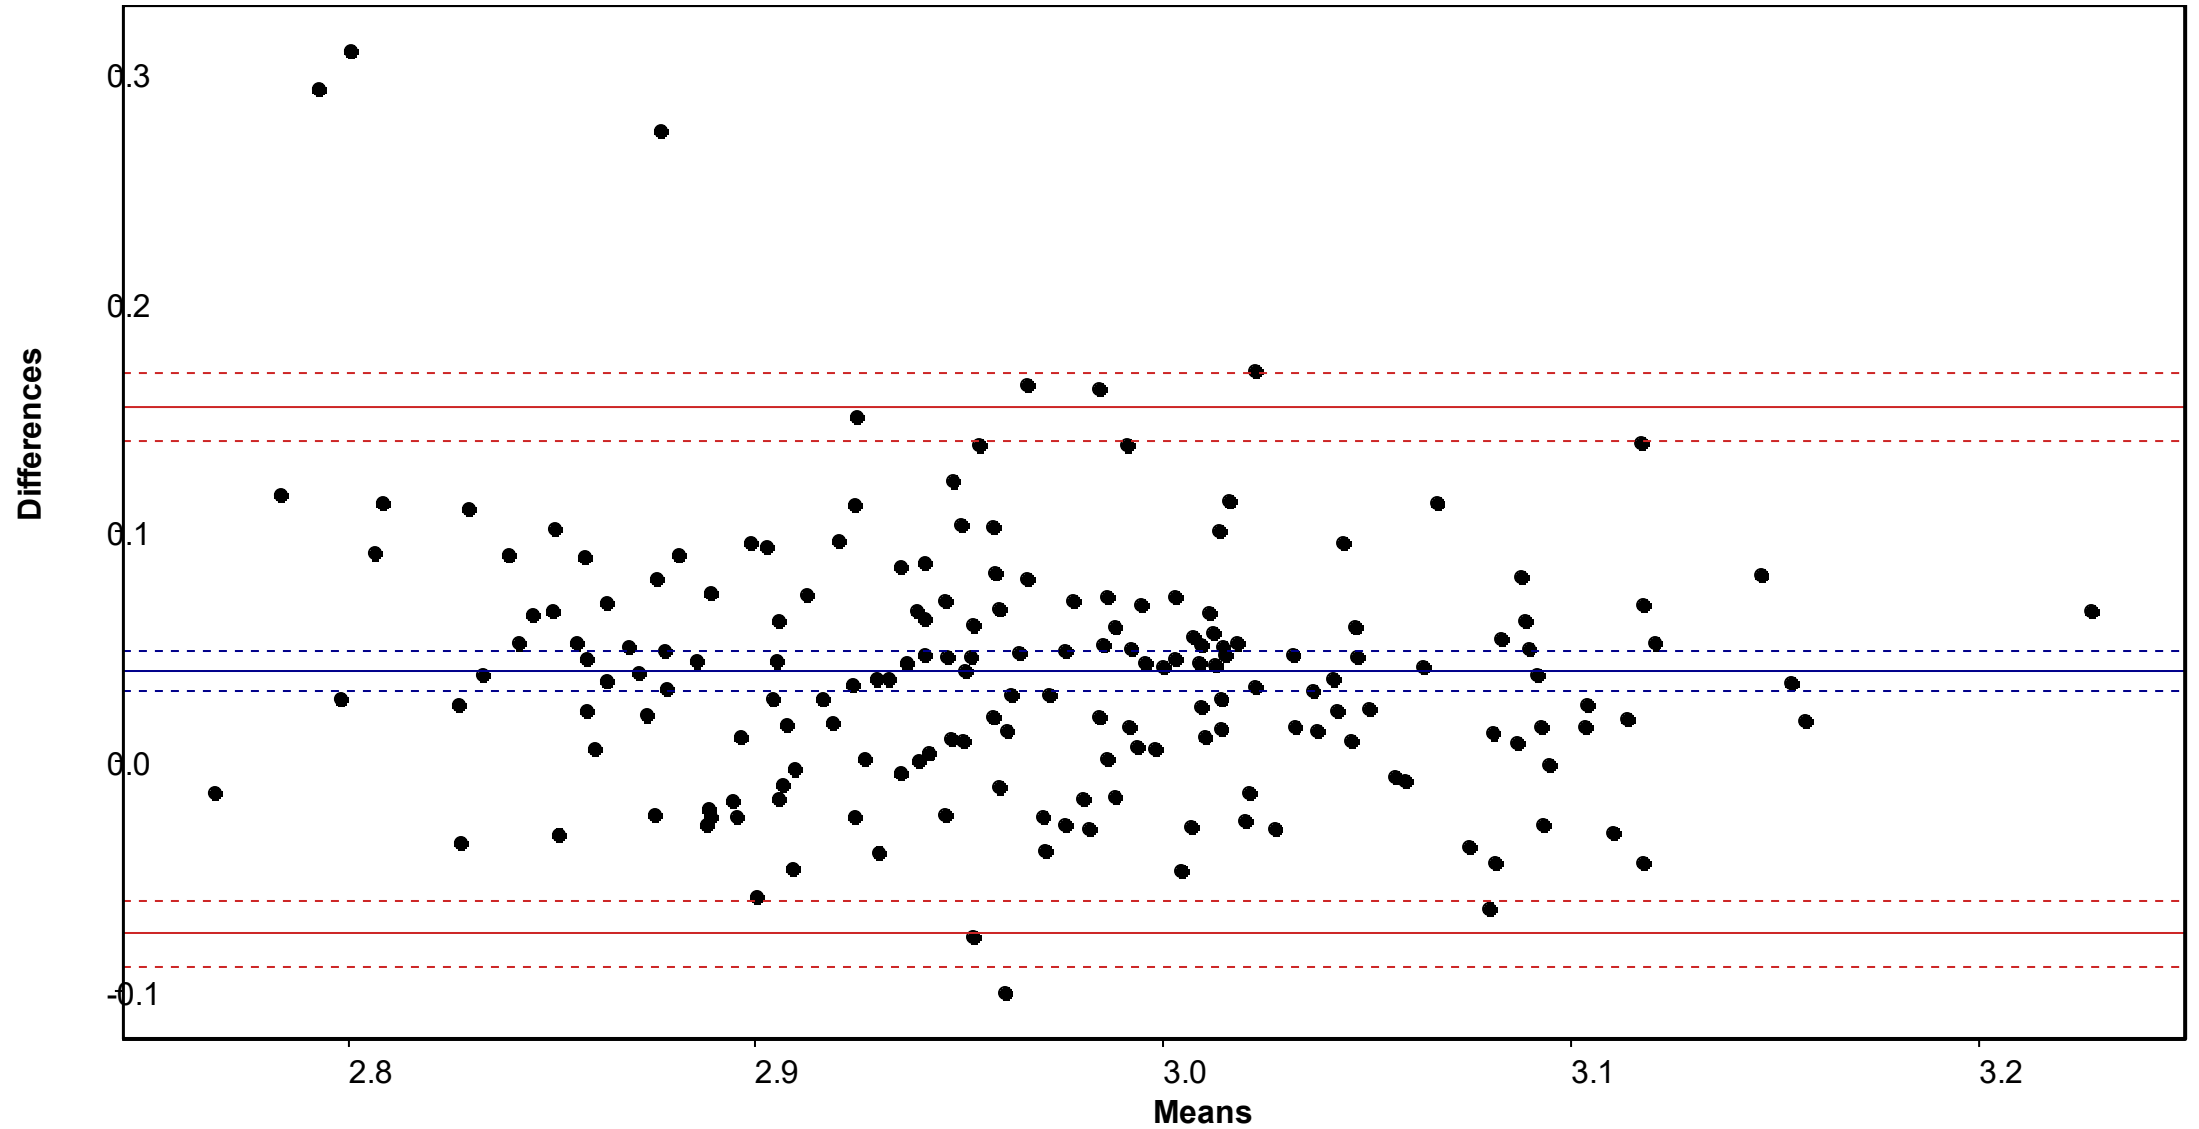



# VEGF-A

TAMC healthy controls [supervised in-clinic collection]

Matched Venous serum and Tasso SST serum [n=183] - T-test p = 1.72e-15

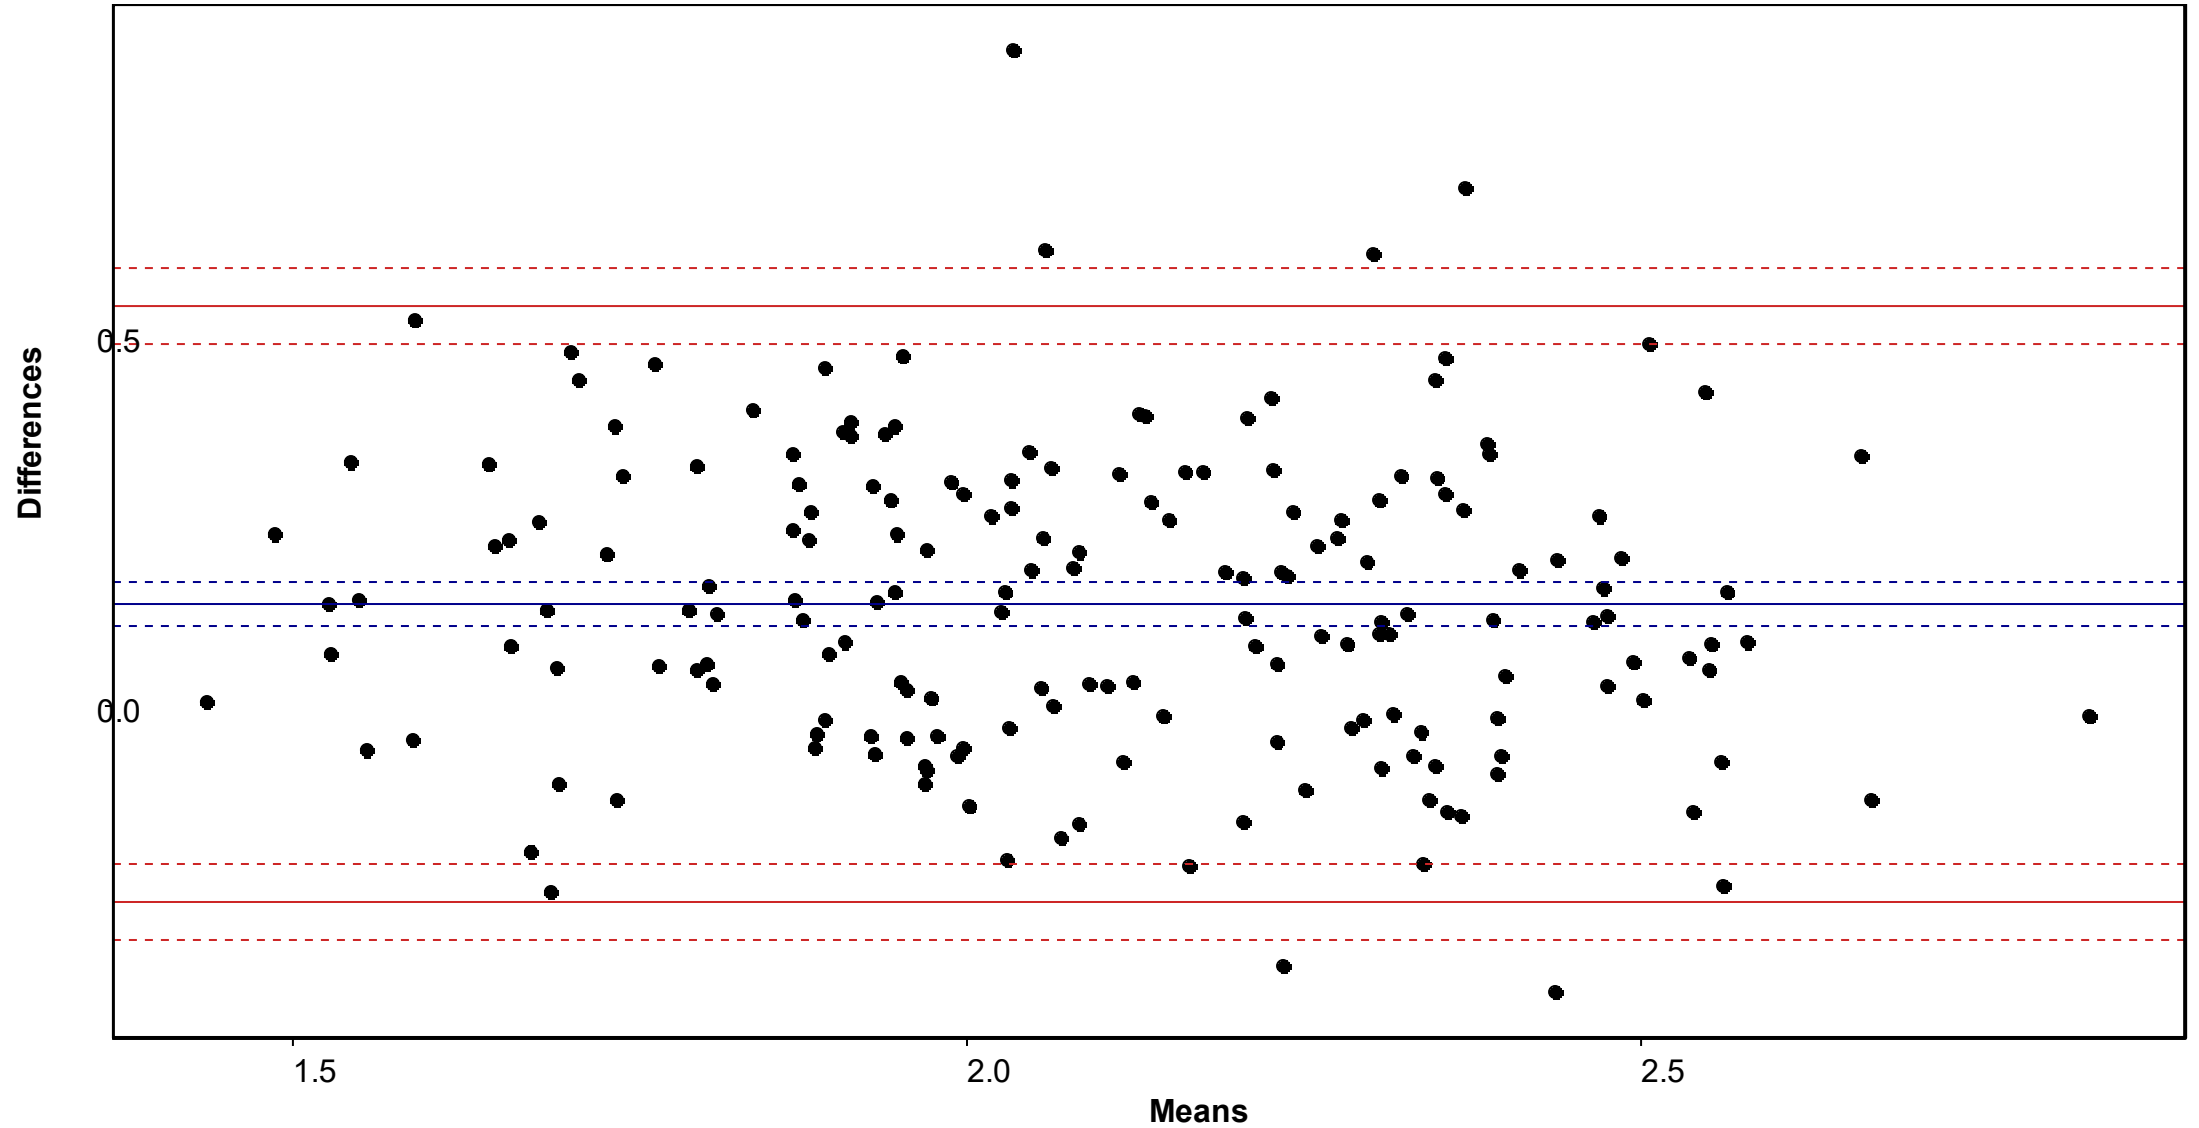

Supplement: pone.0272572.s006.pdf [file pone.0272572.s006.pdf]
