# Supplementary material for: Assessing the use of a micro-sampling device for measuring blood protein levels in healthy subjects and COVID-19 patients
Source: PubMed Central journal article supplement (PMC9365123; doi:10.1371/journal.pone.0272572), 2022-08-10

### CD163 - Tasso SST serum at baseline

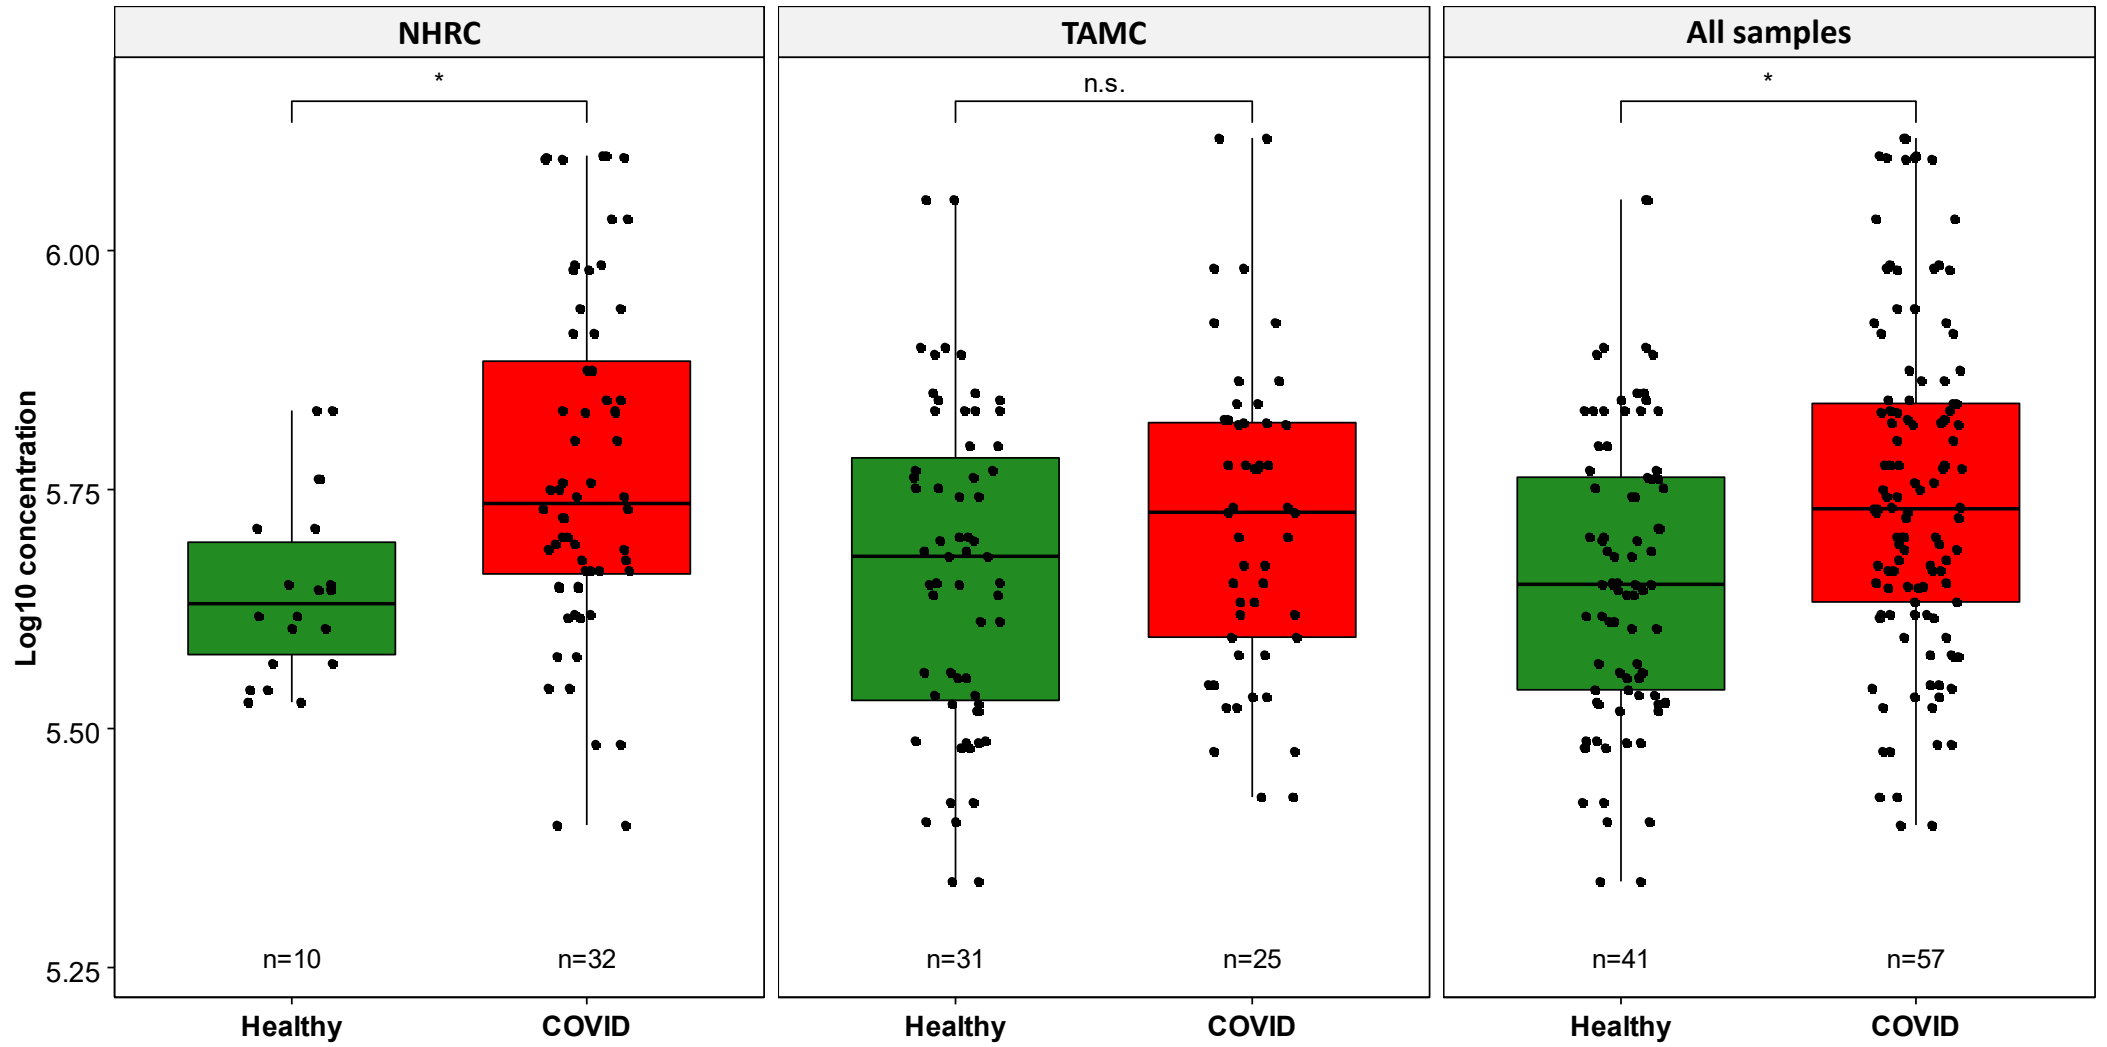

### CRP - Tasso SST serum at baseline

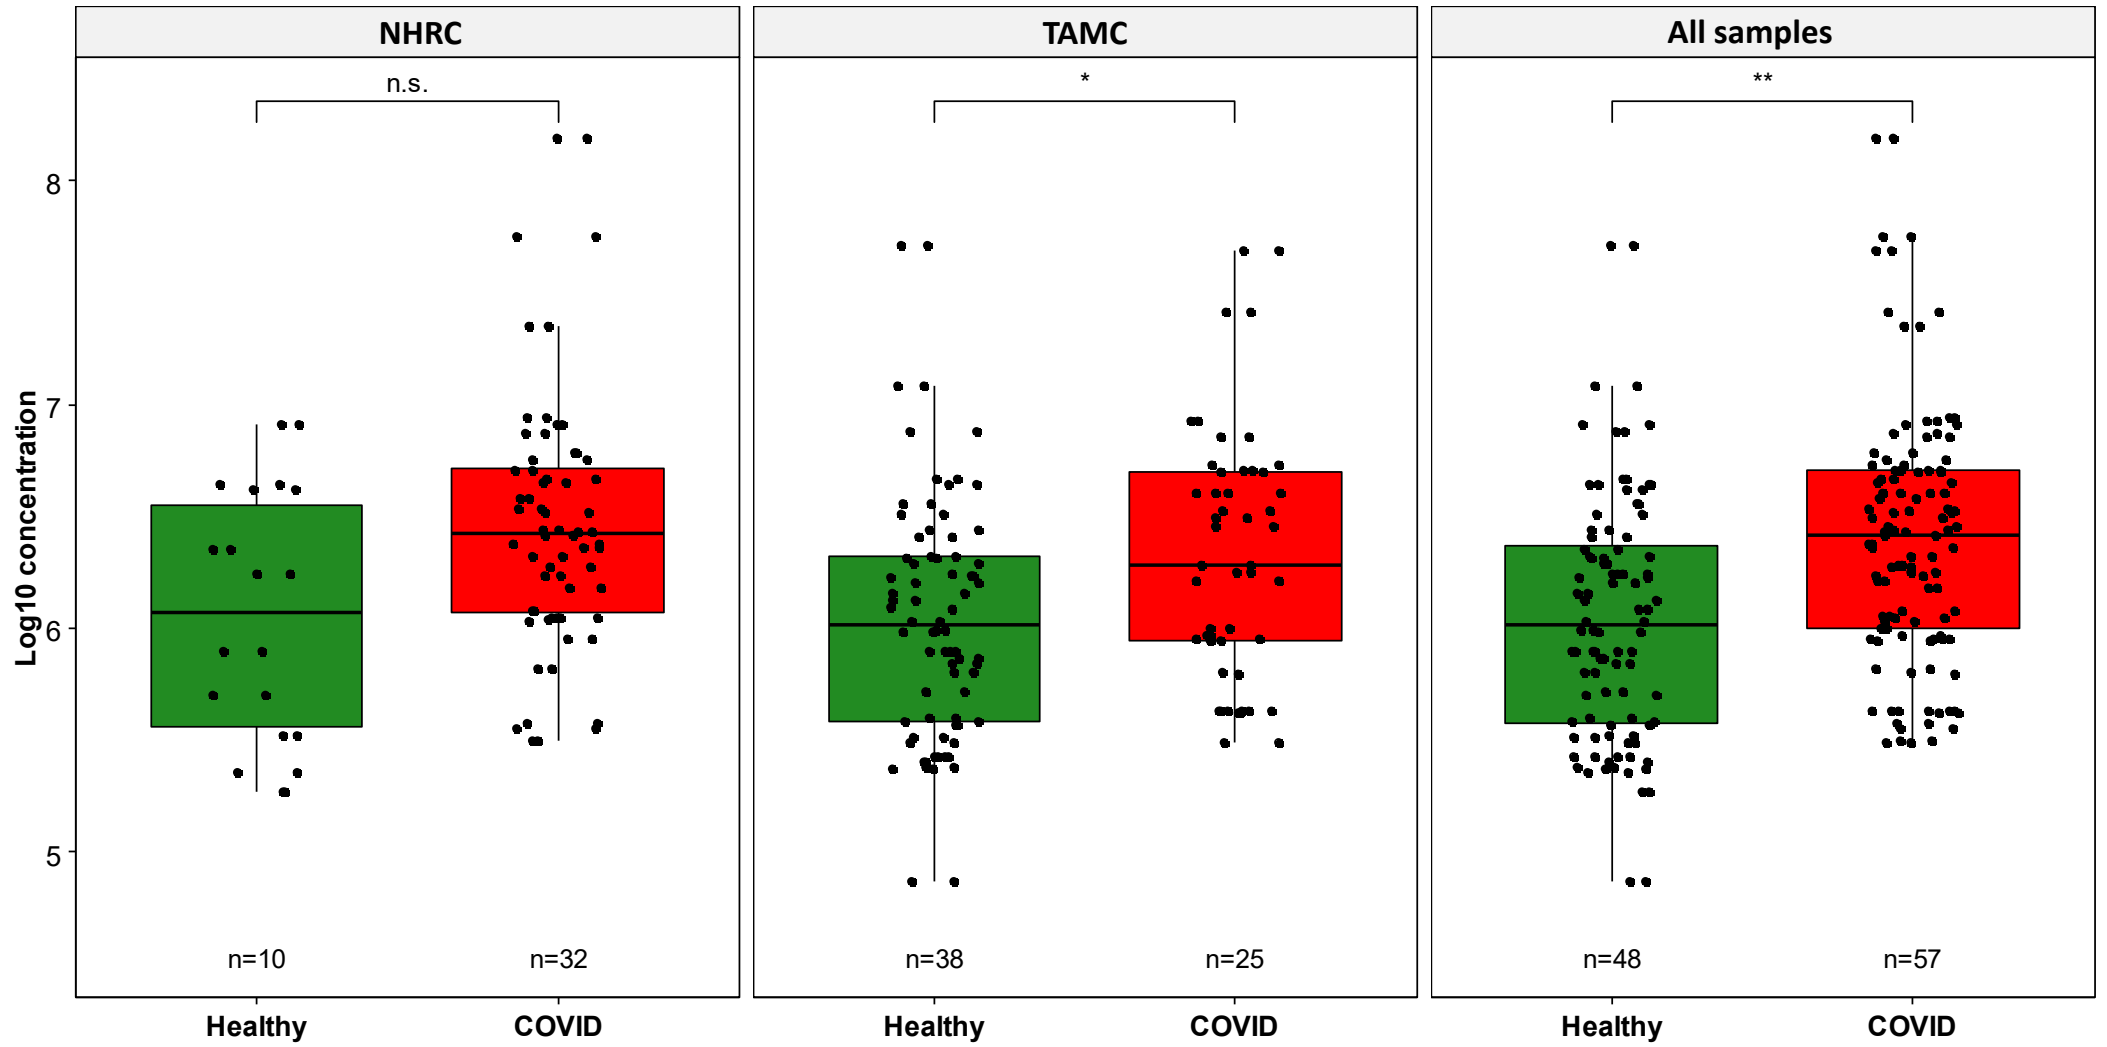

### CXCL10 - Tasso SST serum at baseline

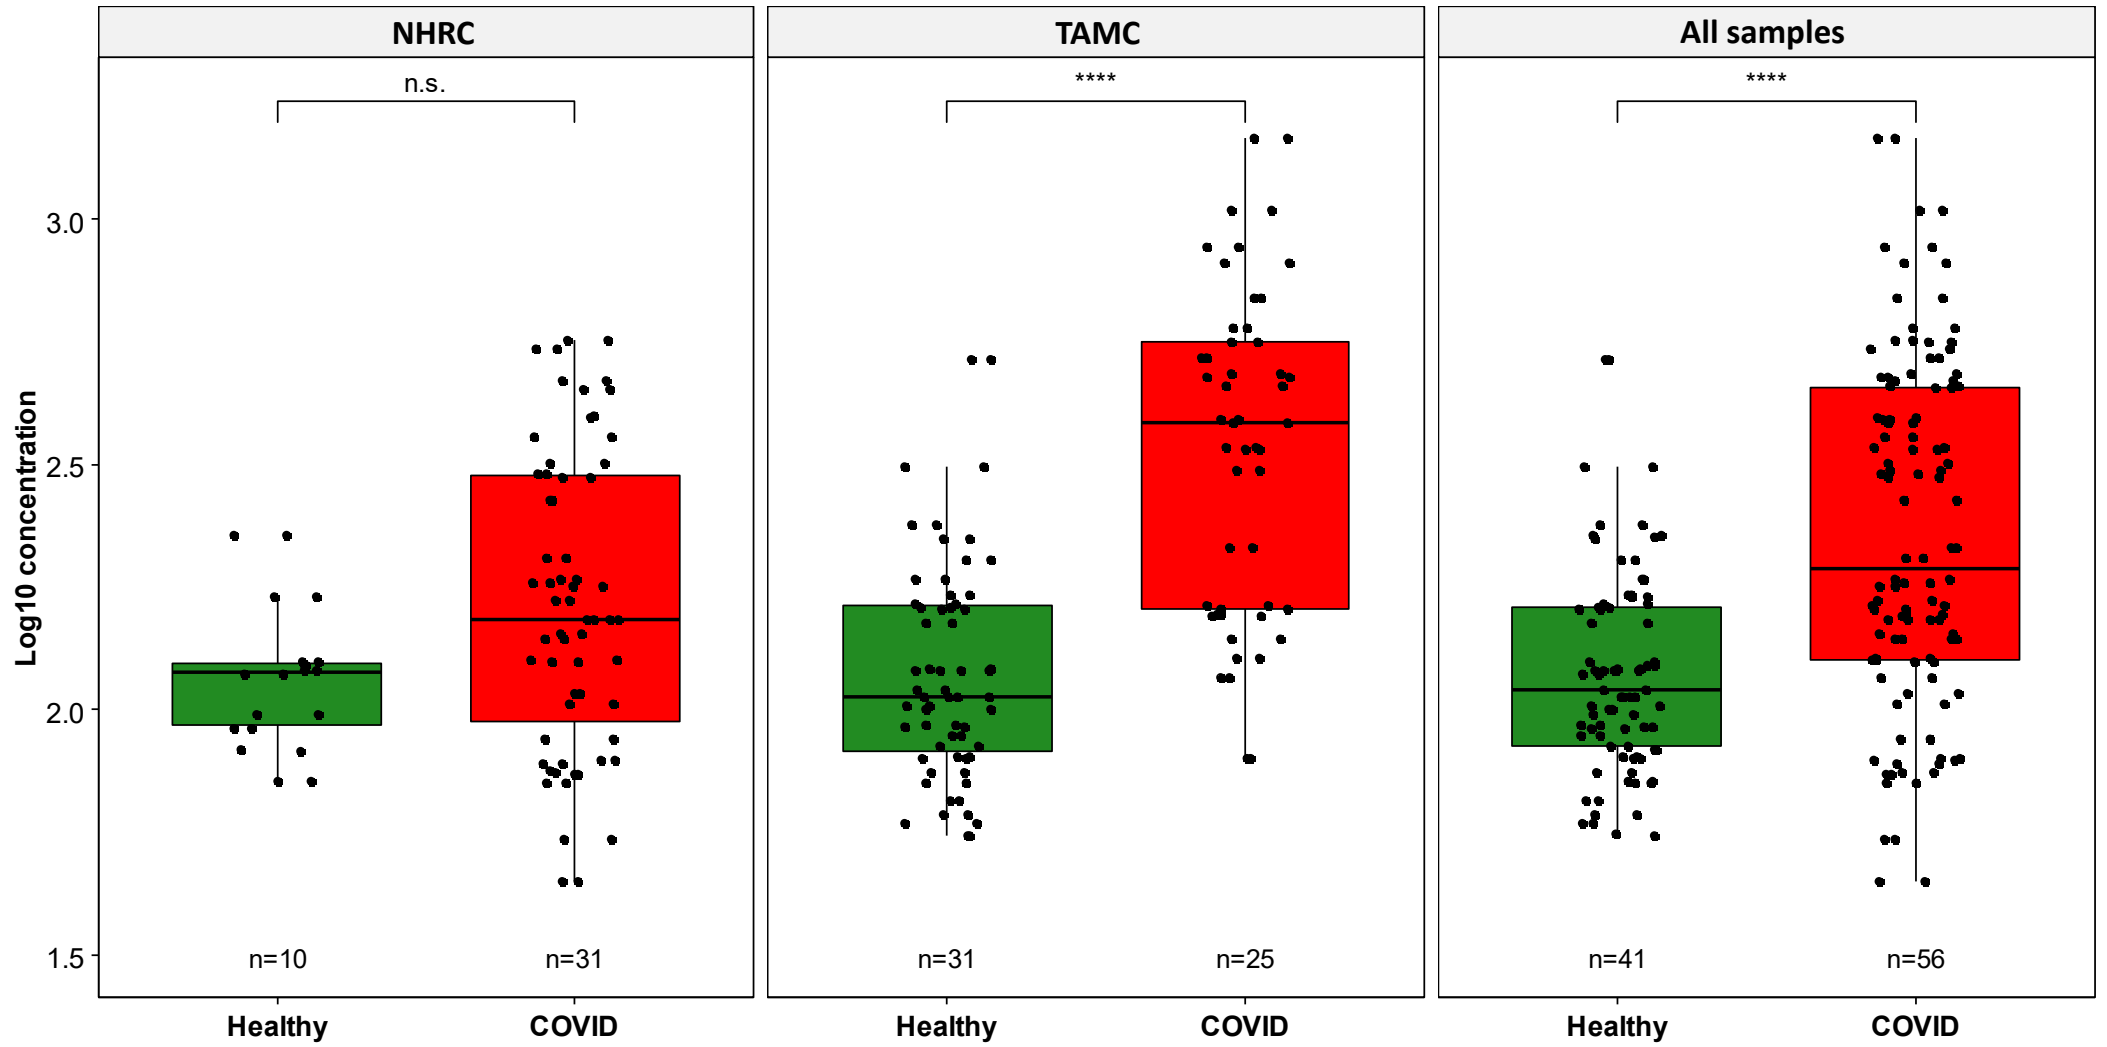

# D-dimer - Tasso SST serum at baseline

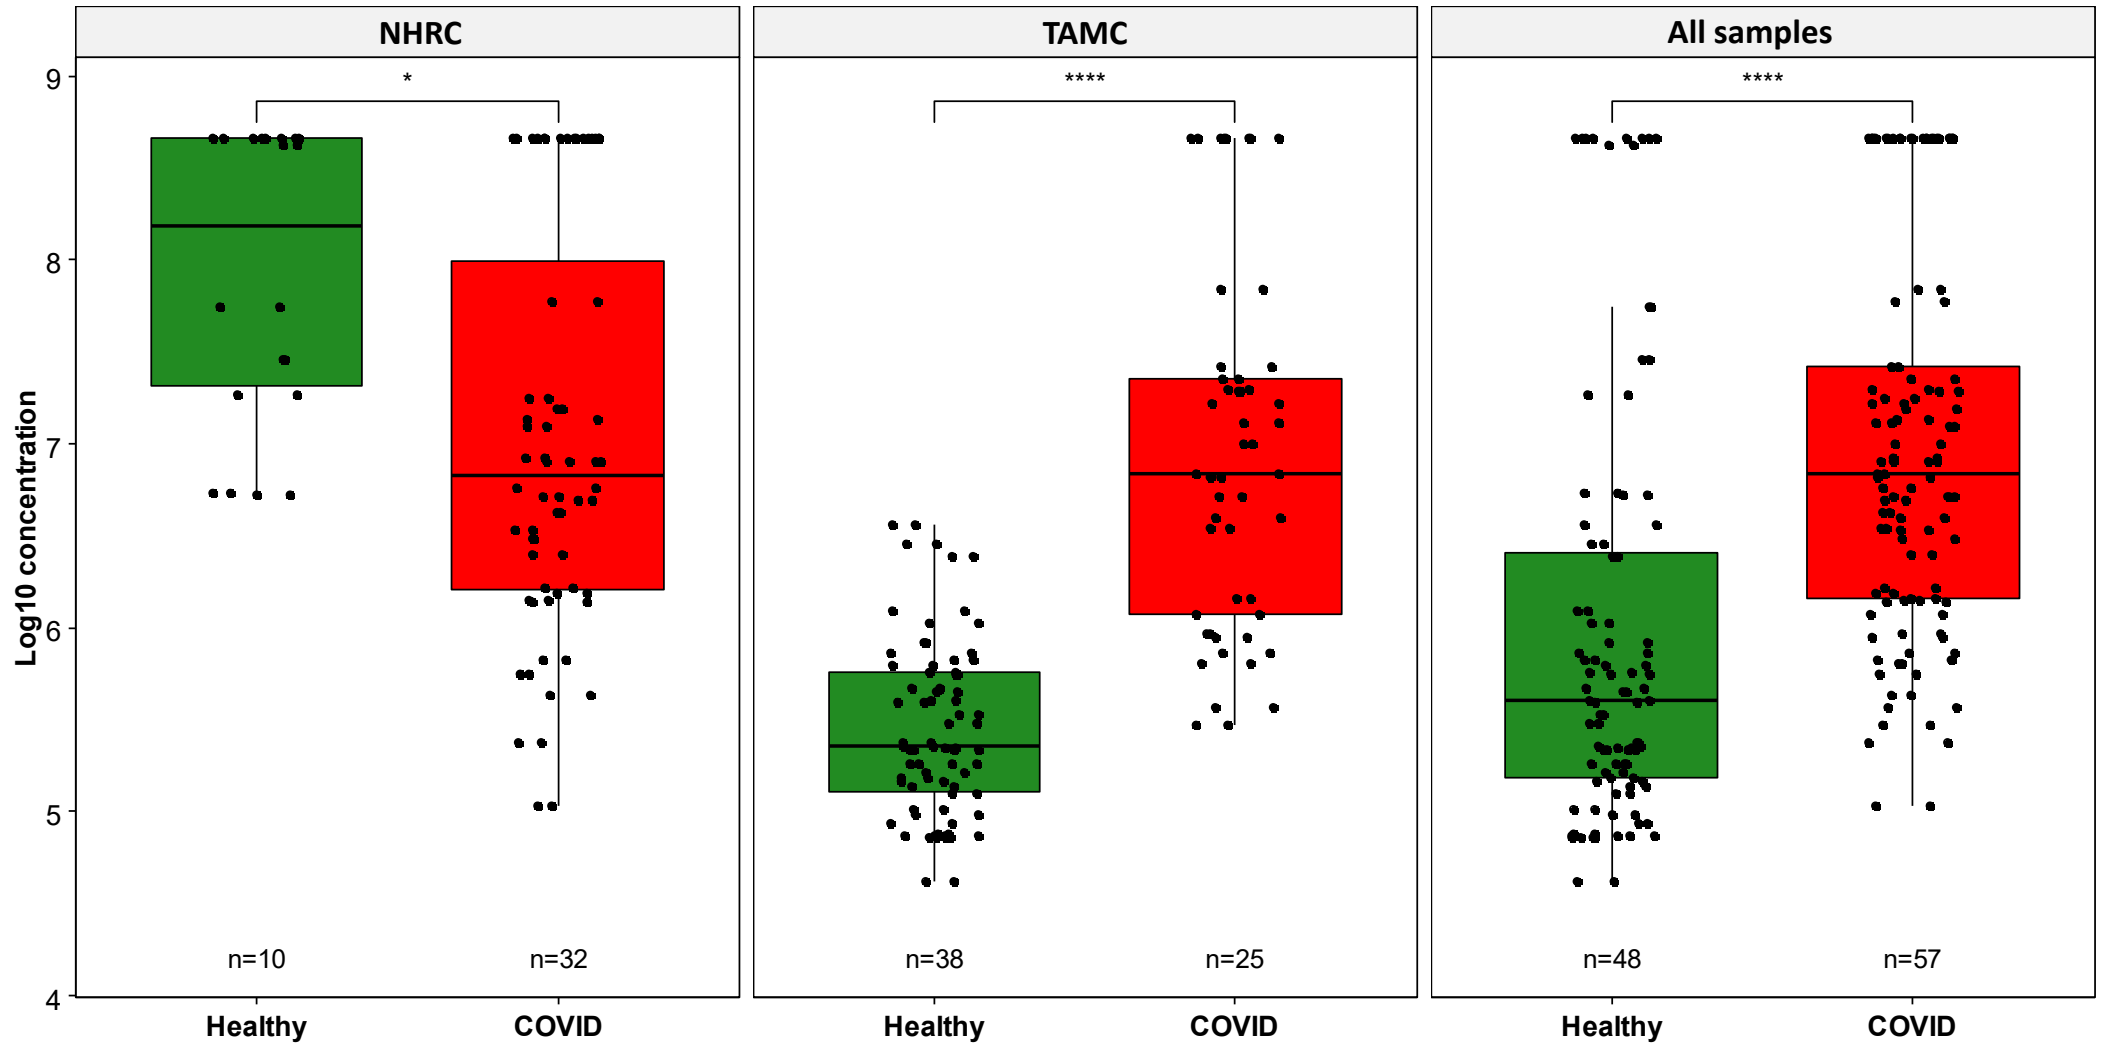

# Ferritin - Tasso SST serum at baseline

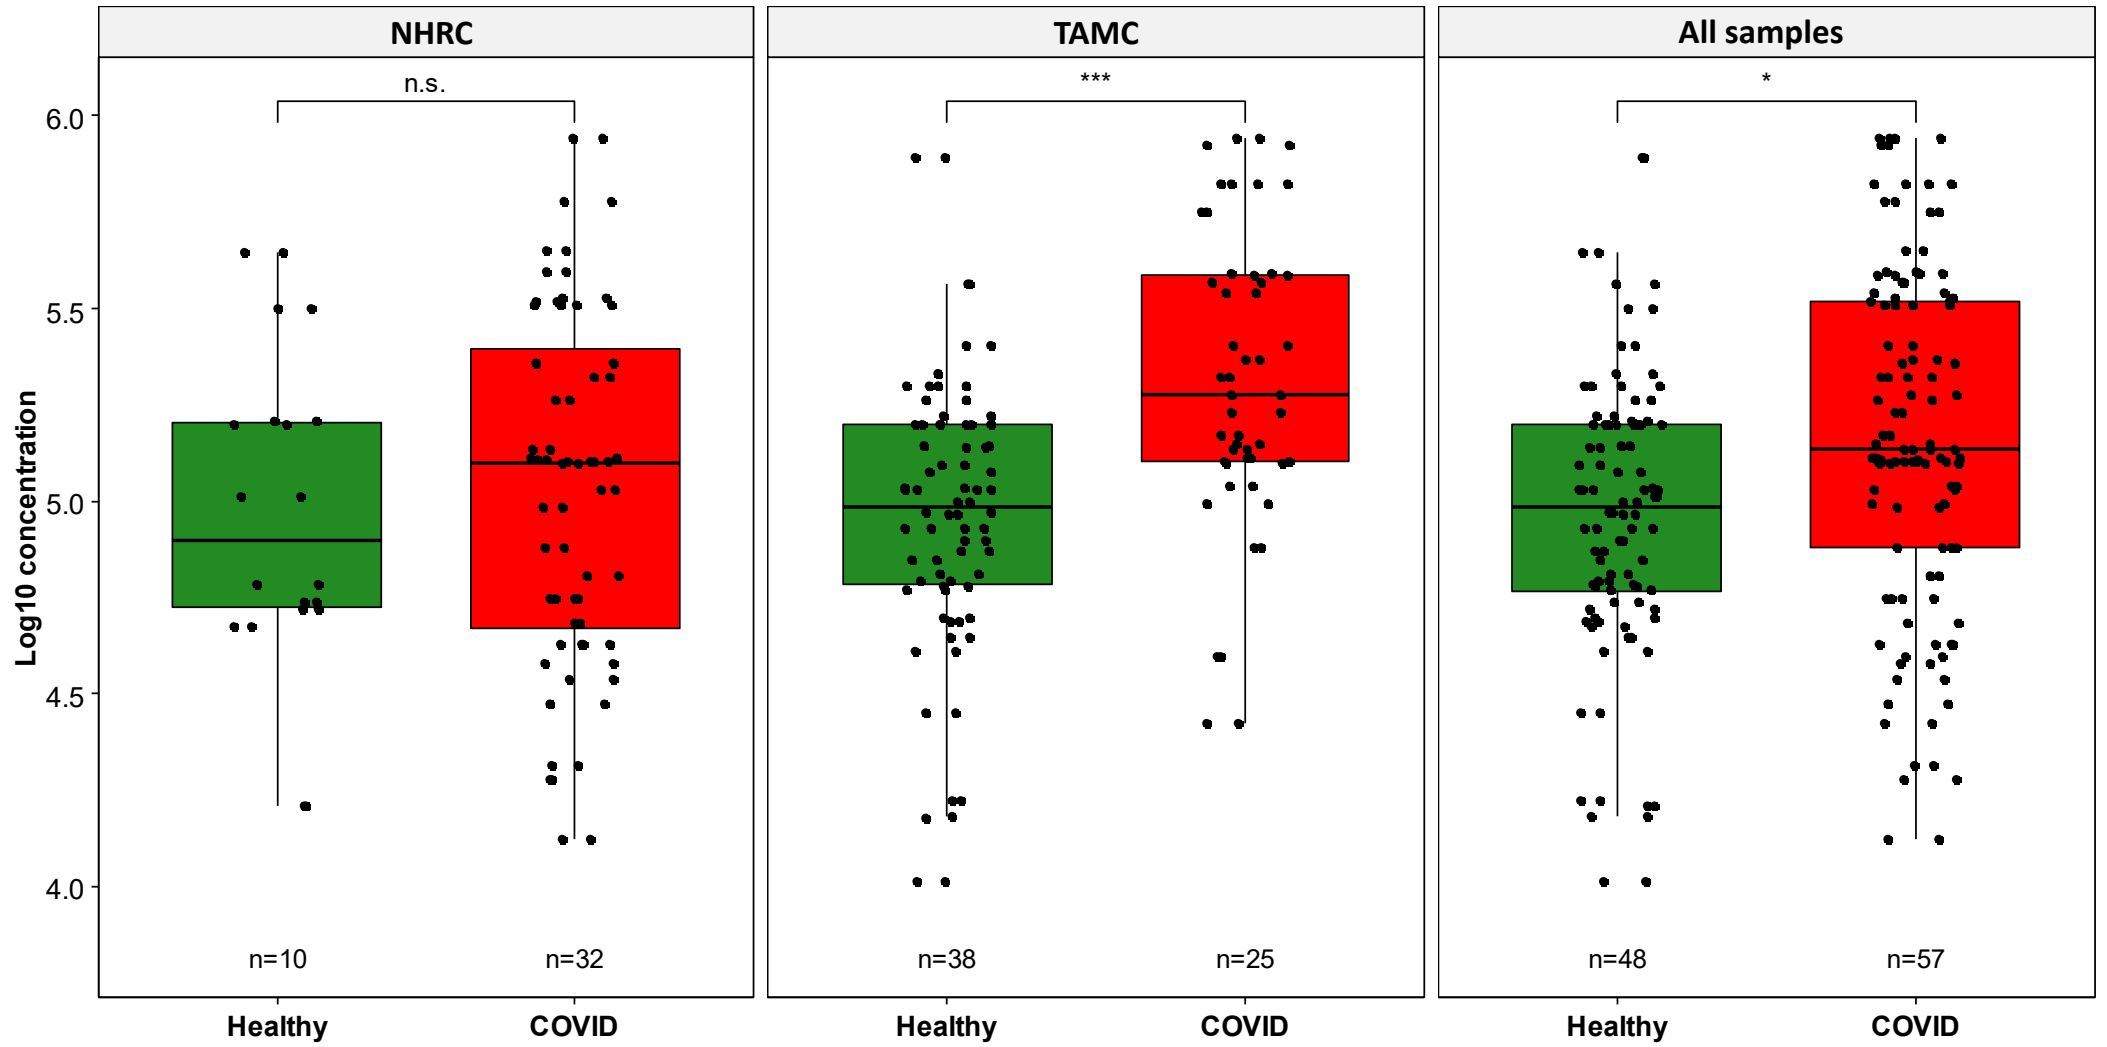

# ICAM-1 - Tasso SST serum at baseline

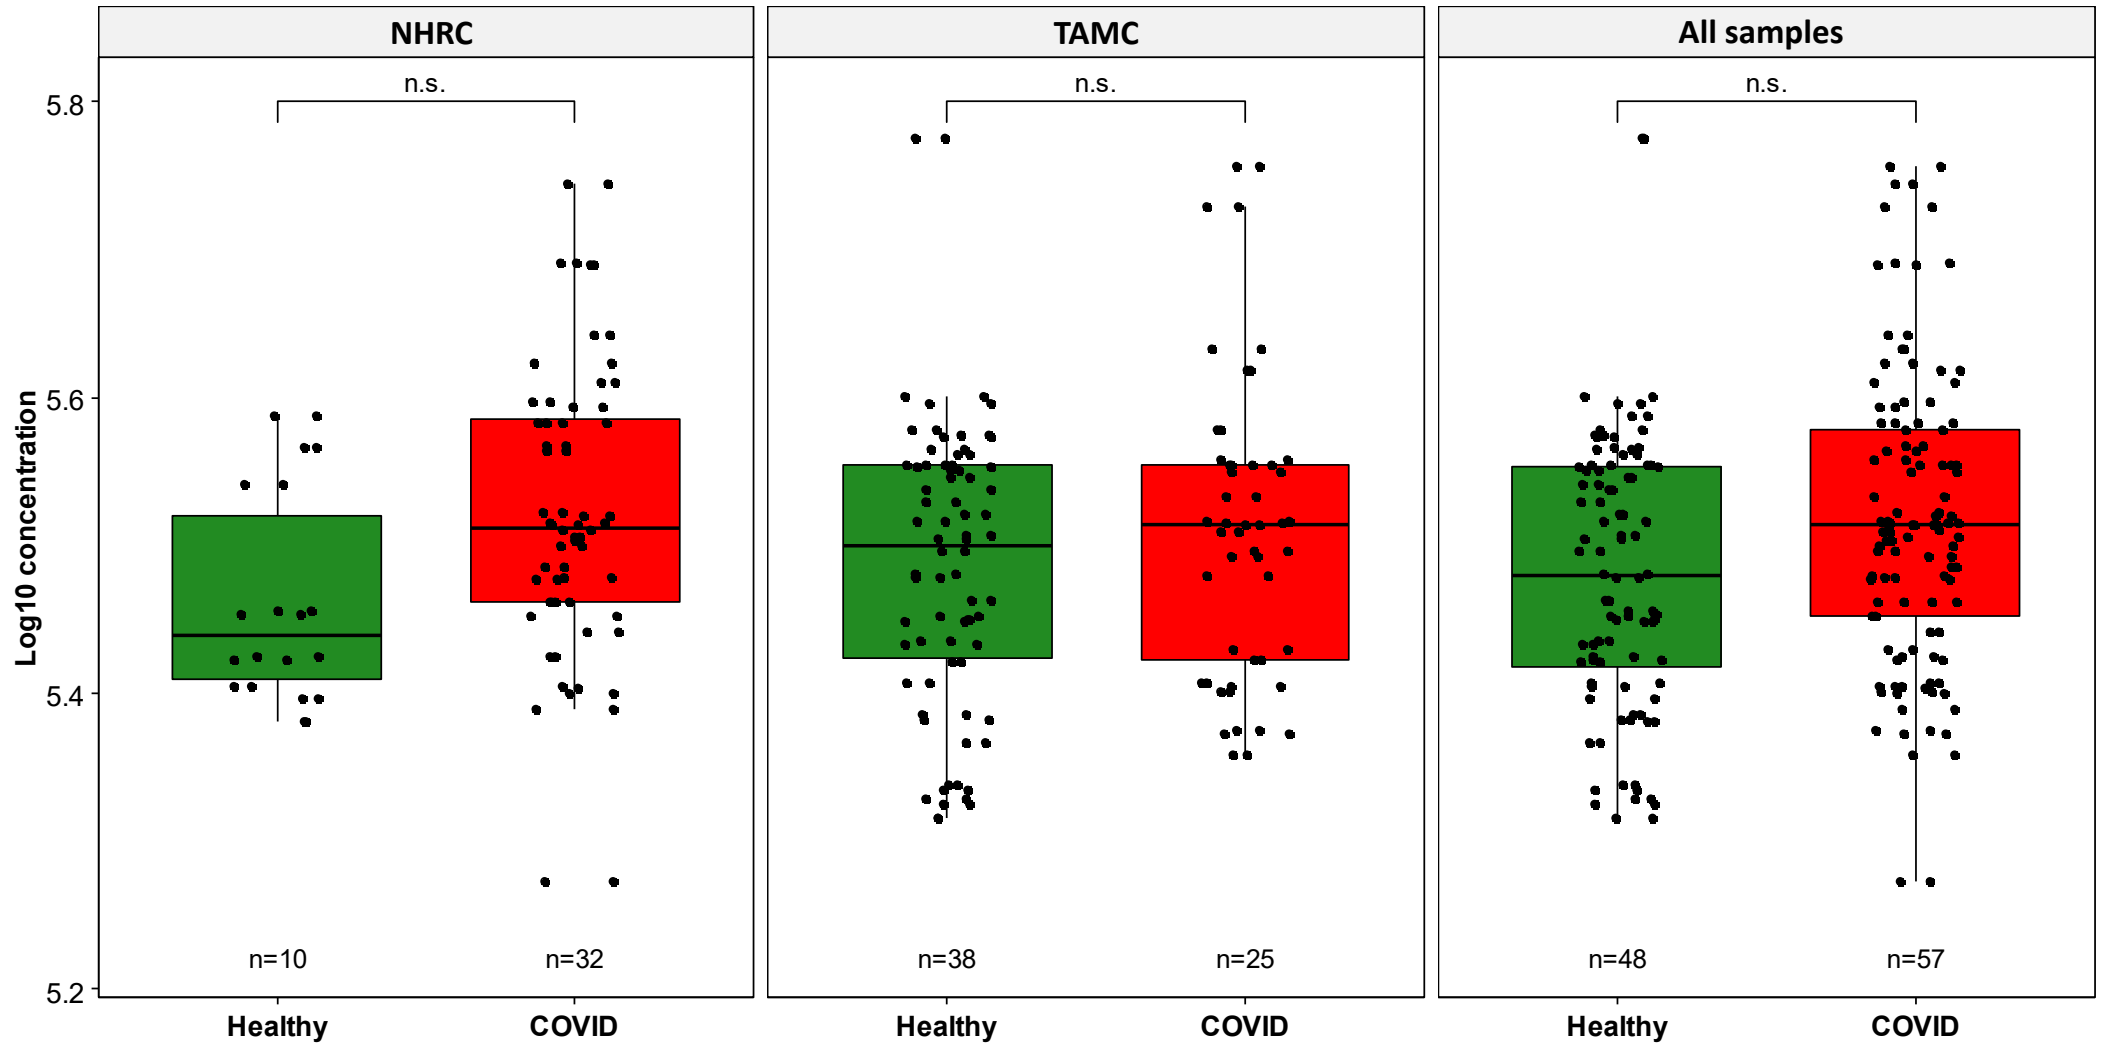

IL-1B - Tasso SST serum at baseline

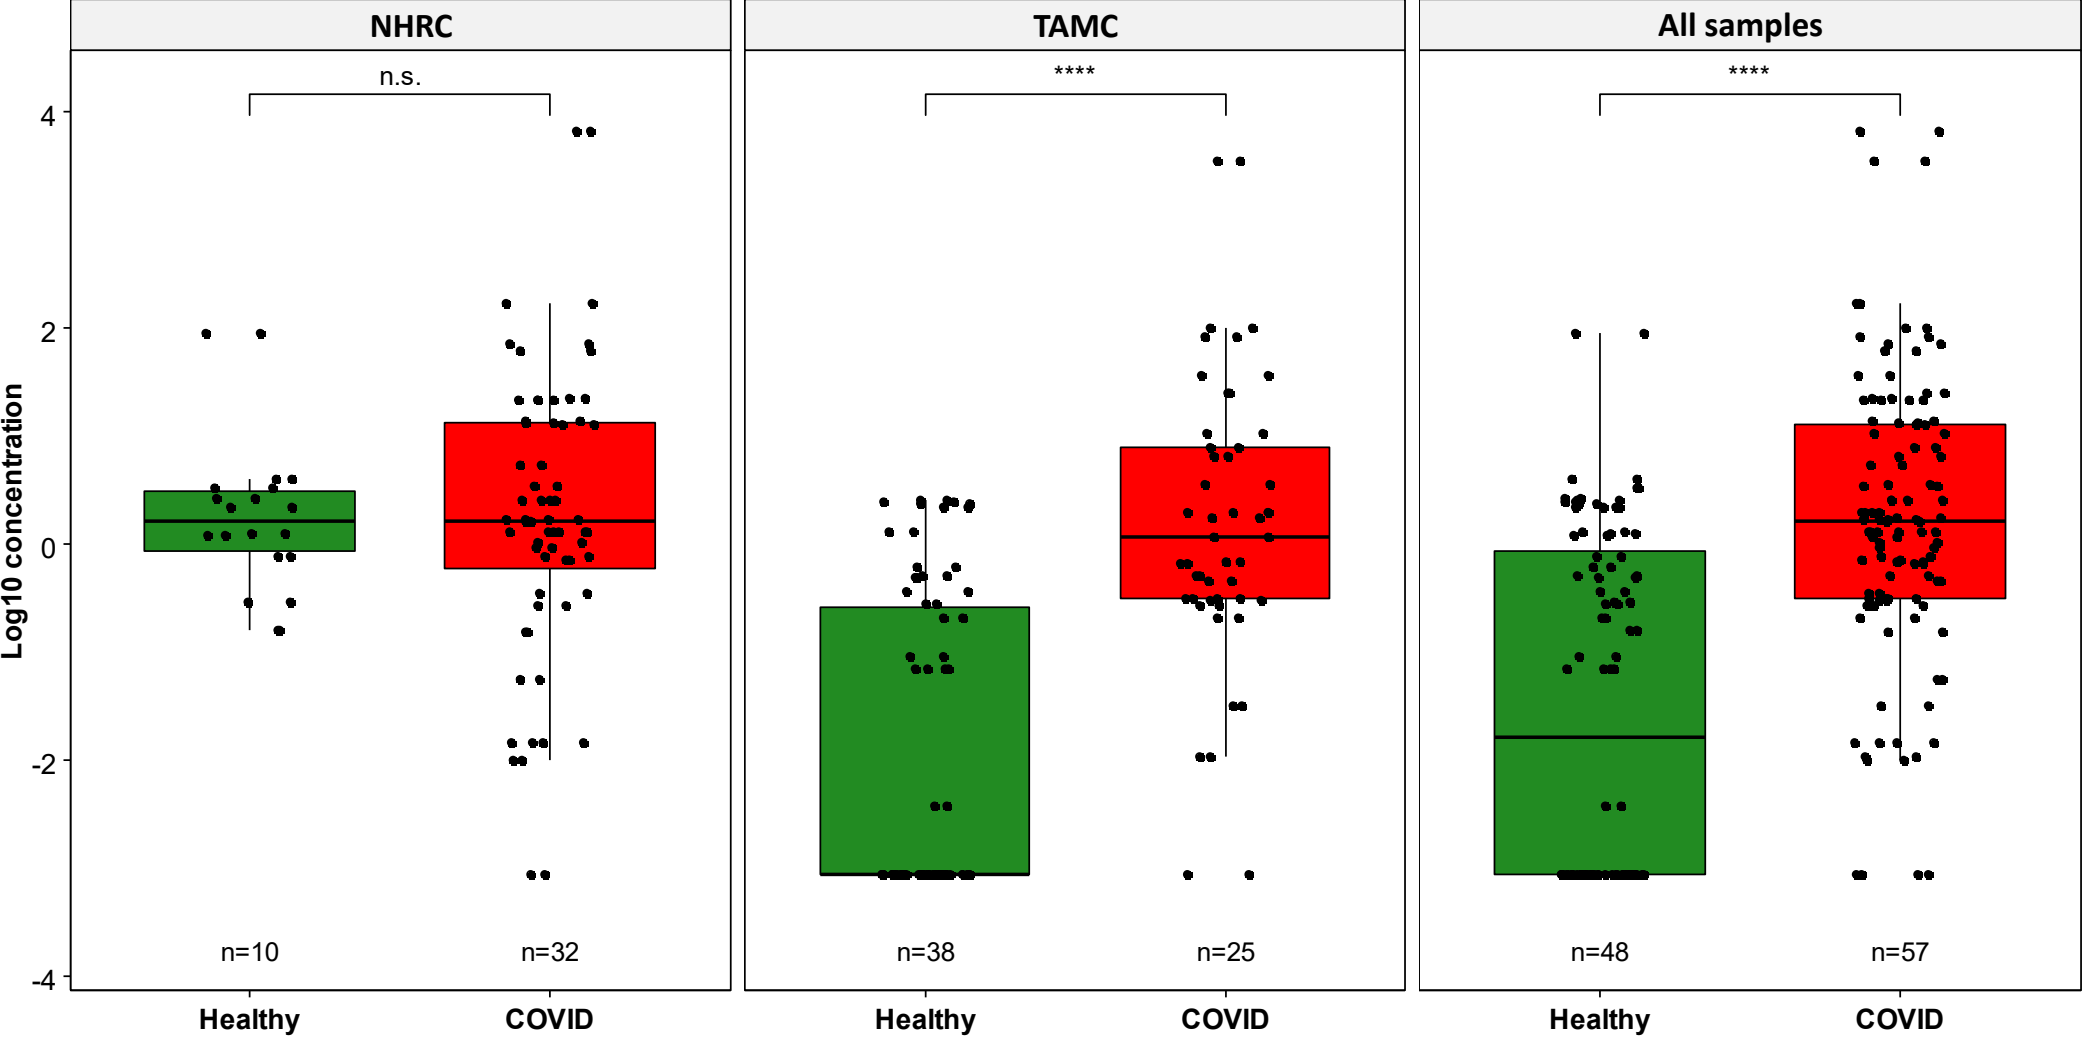

# IL-1Ra - Tasso SST serum at baseline

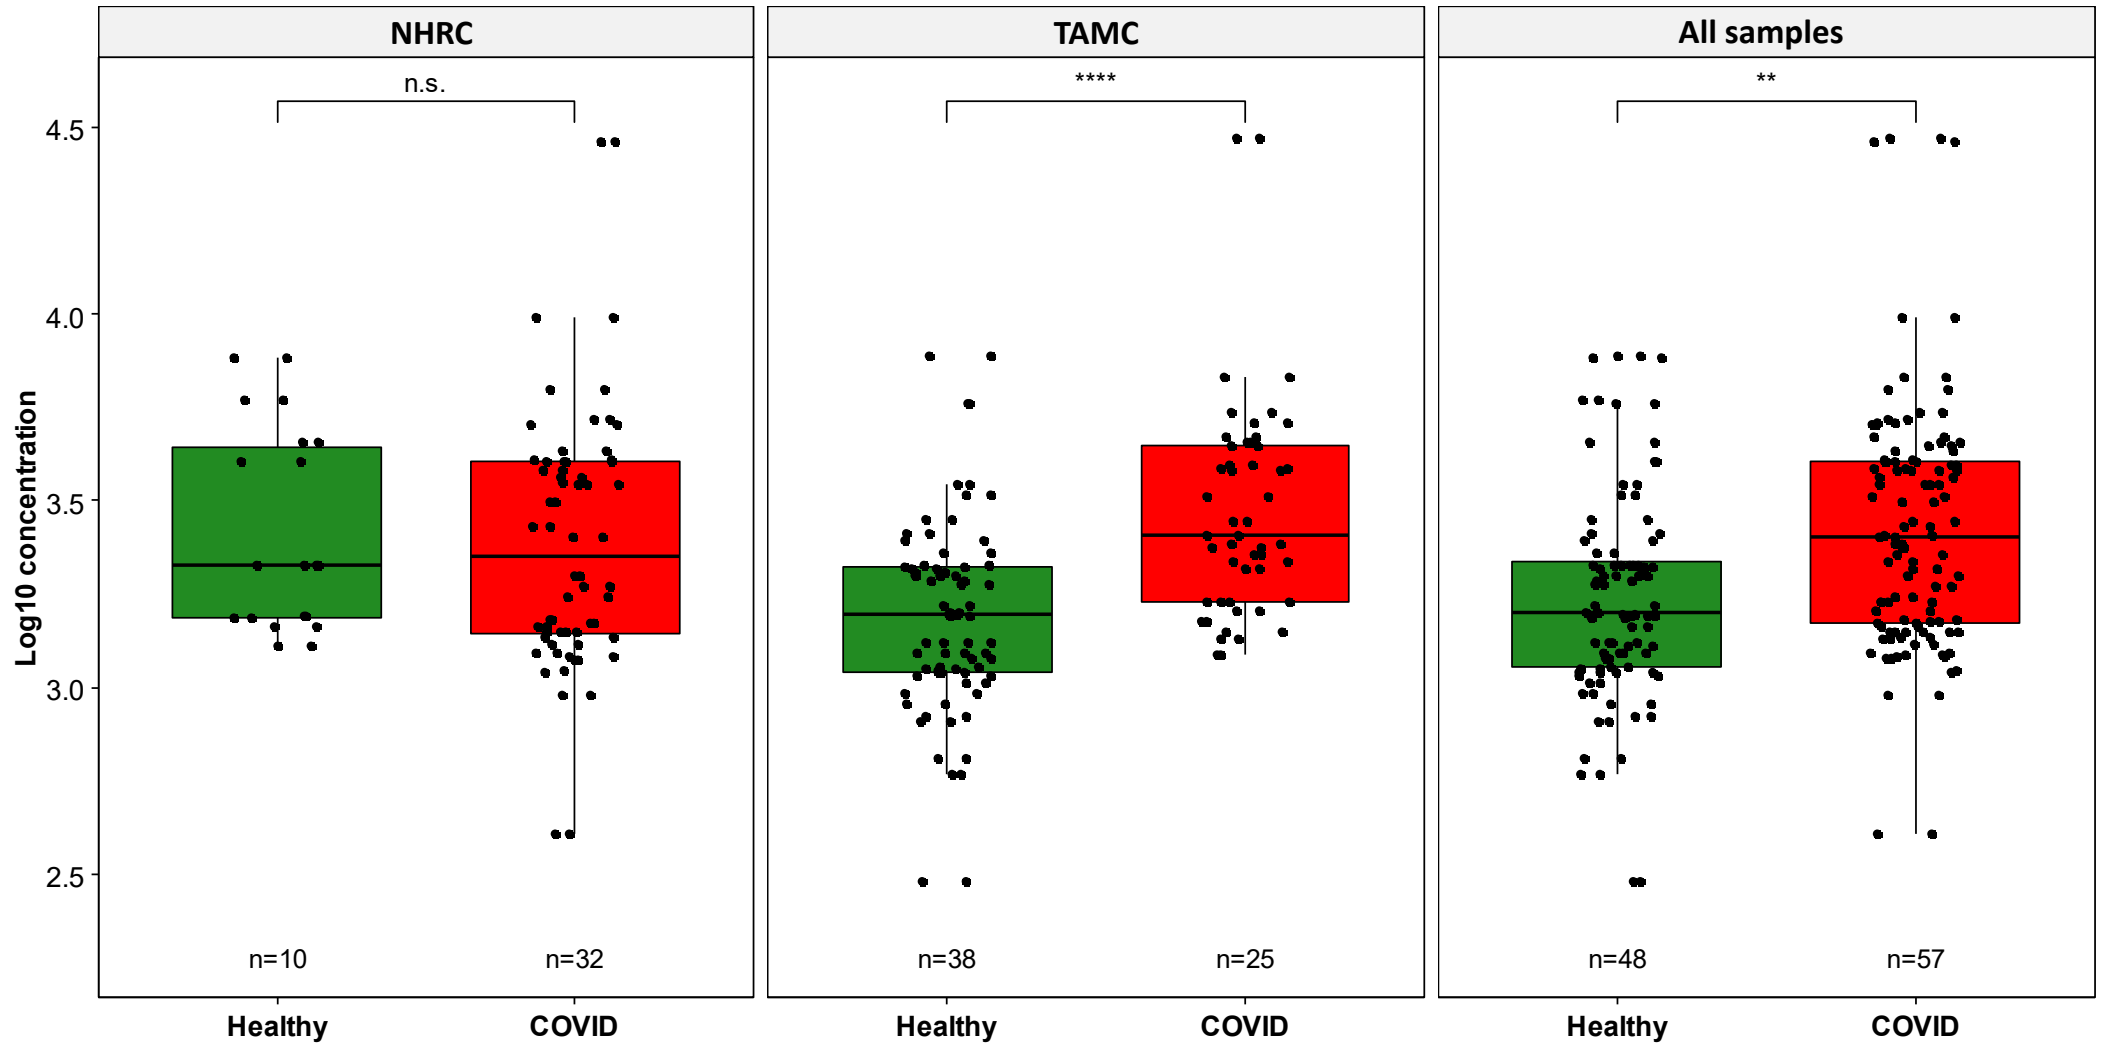



### IL-5 - Tasso SST serum at baseline

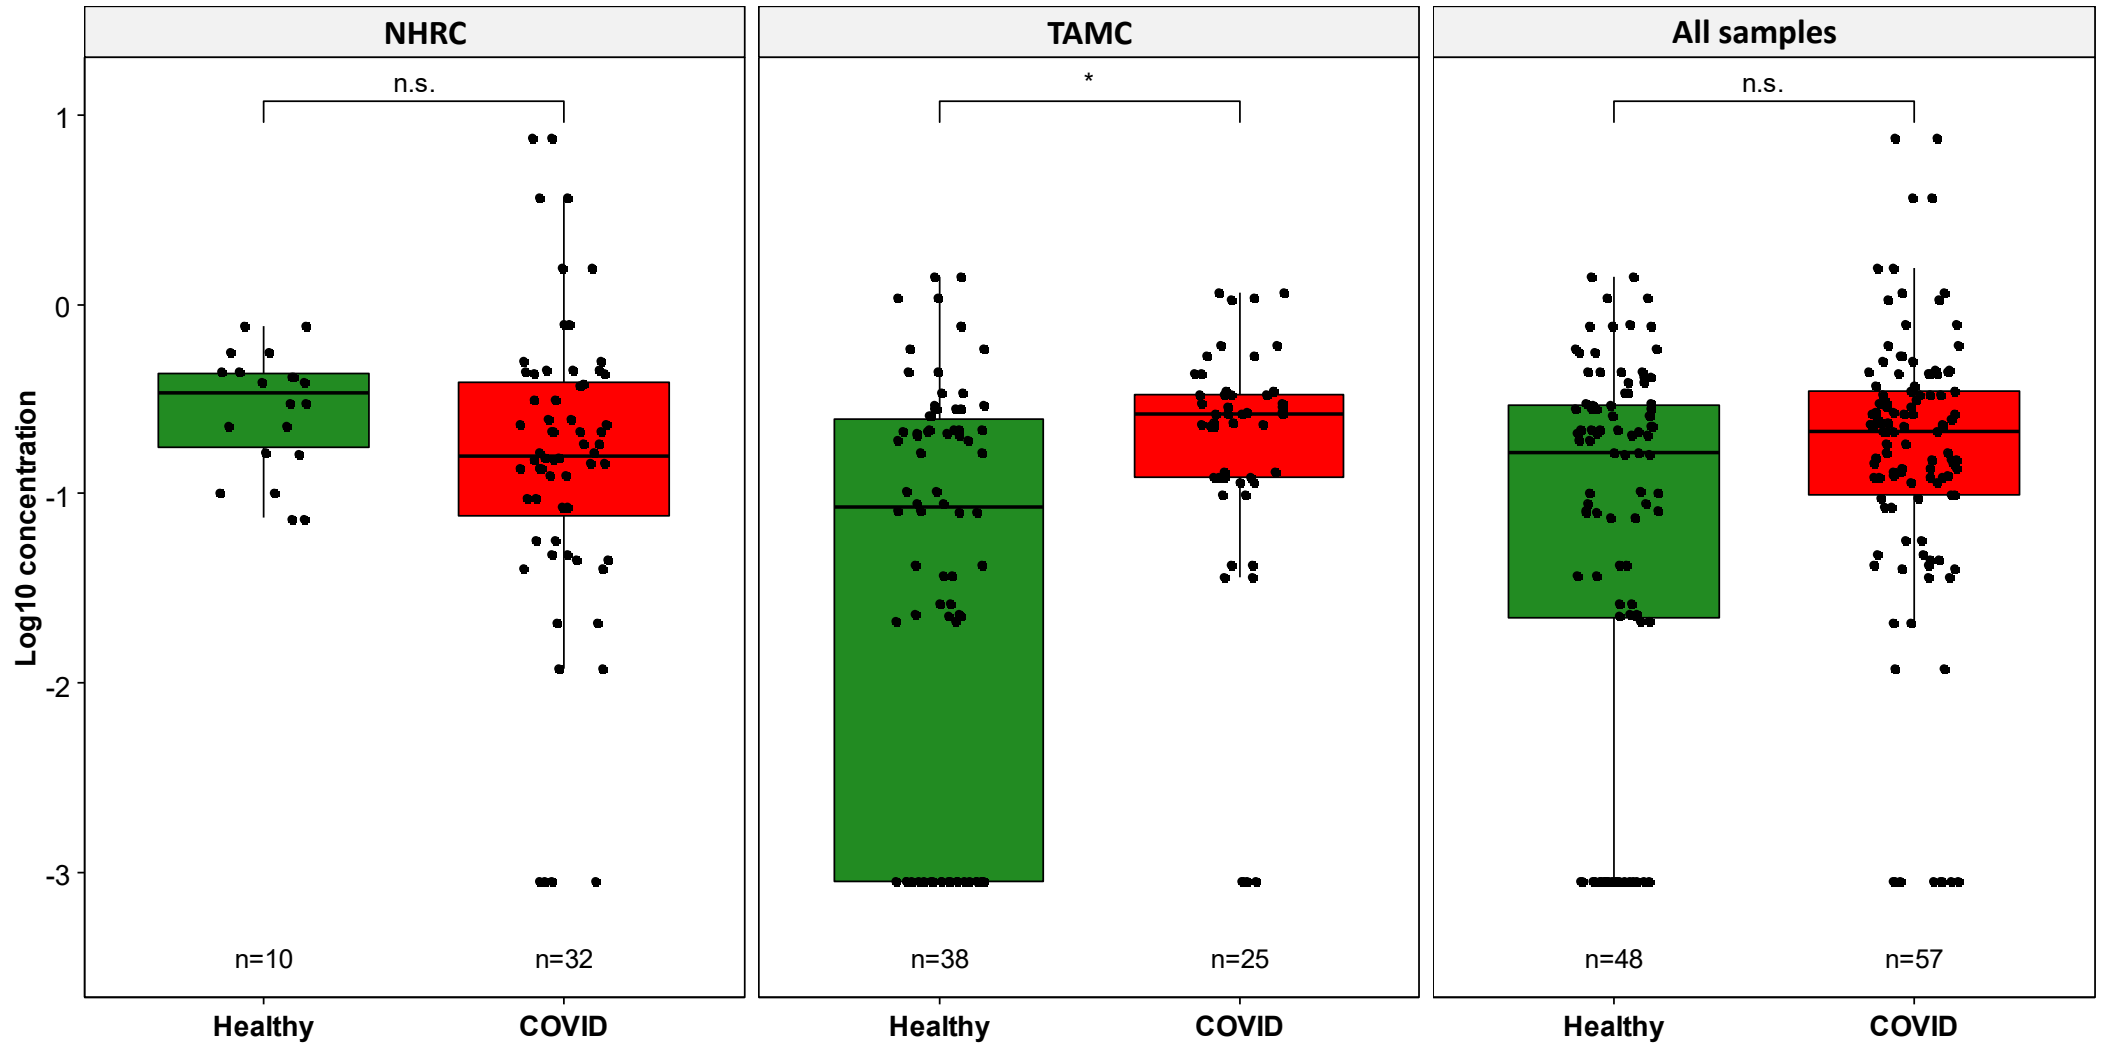

### IL-6 - Tasso SST serum at baseline

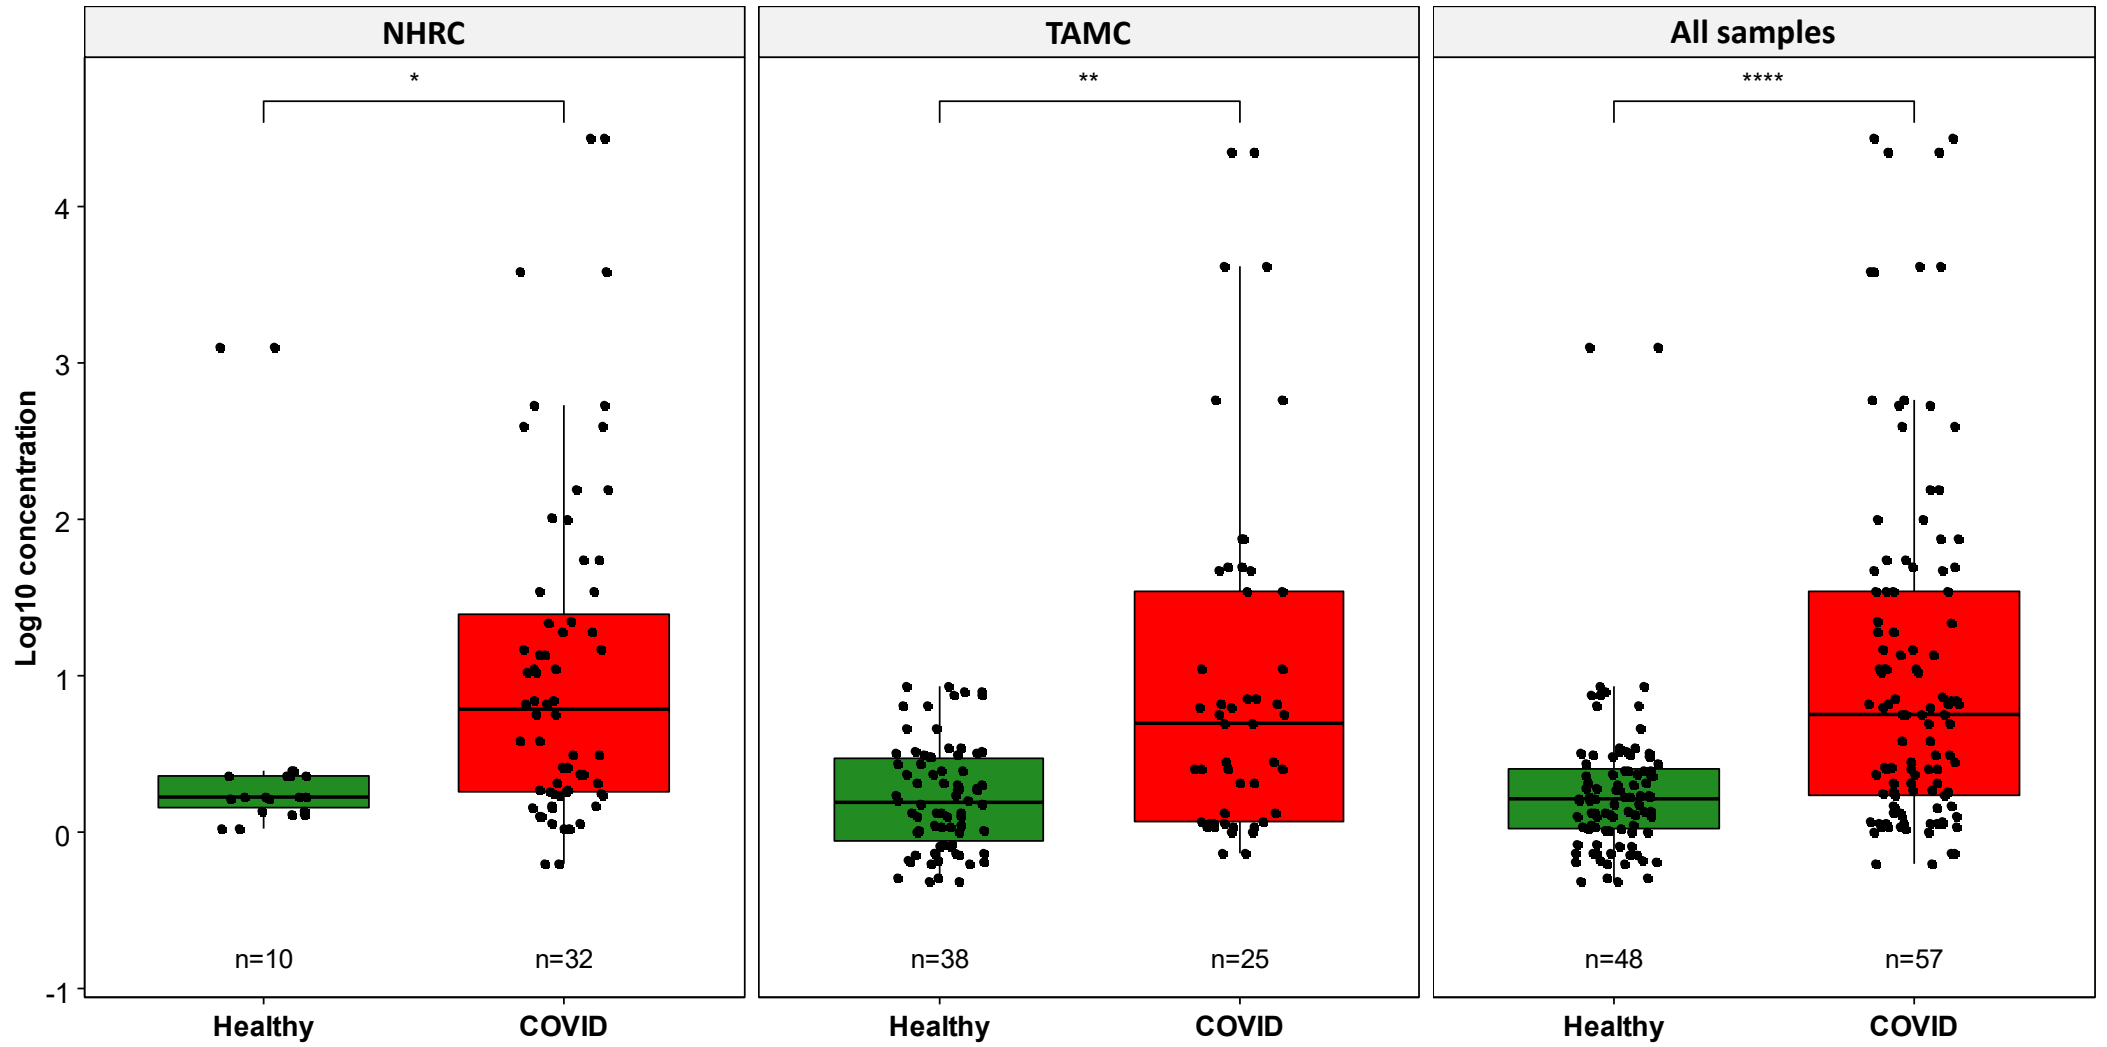

# IL-6Ra - Tasso SST serum at baseline

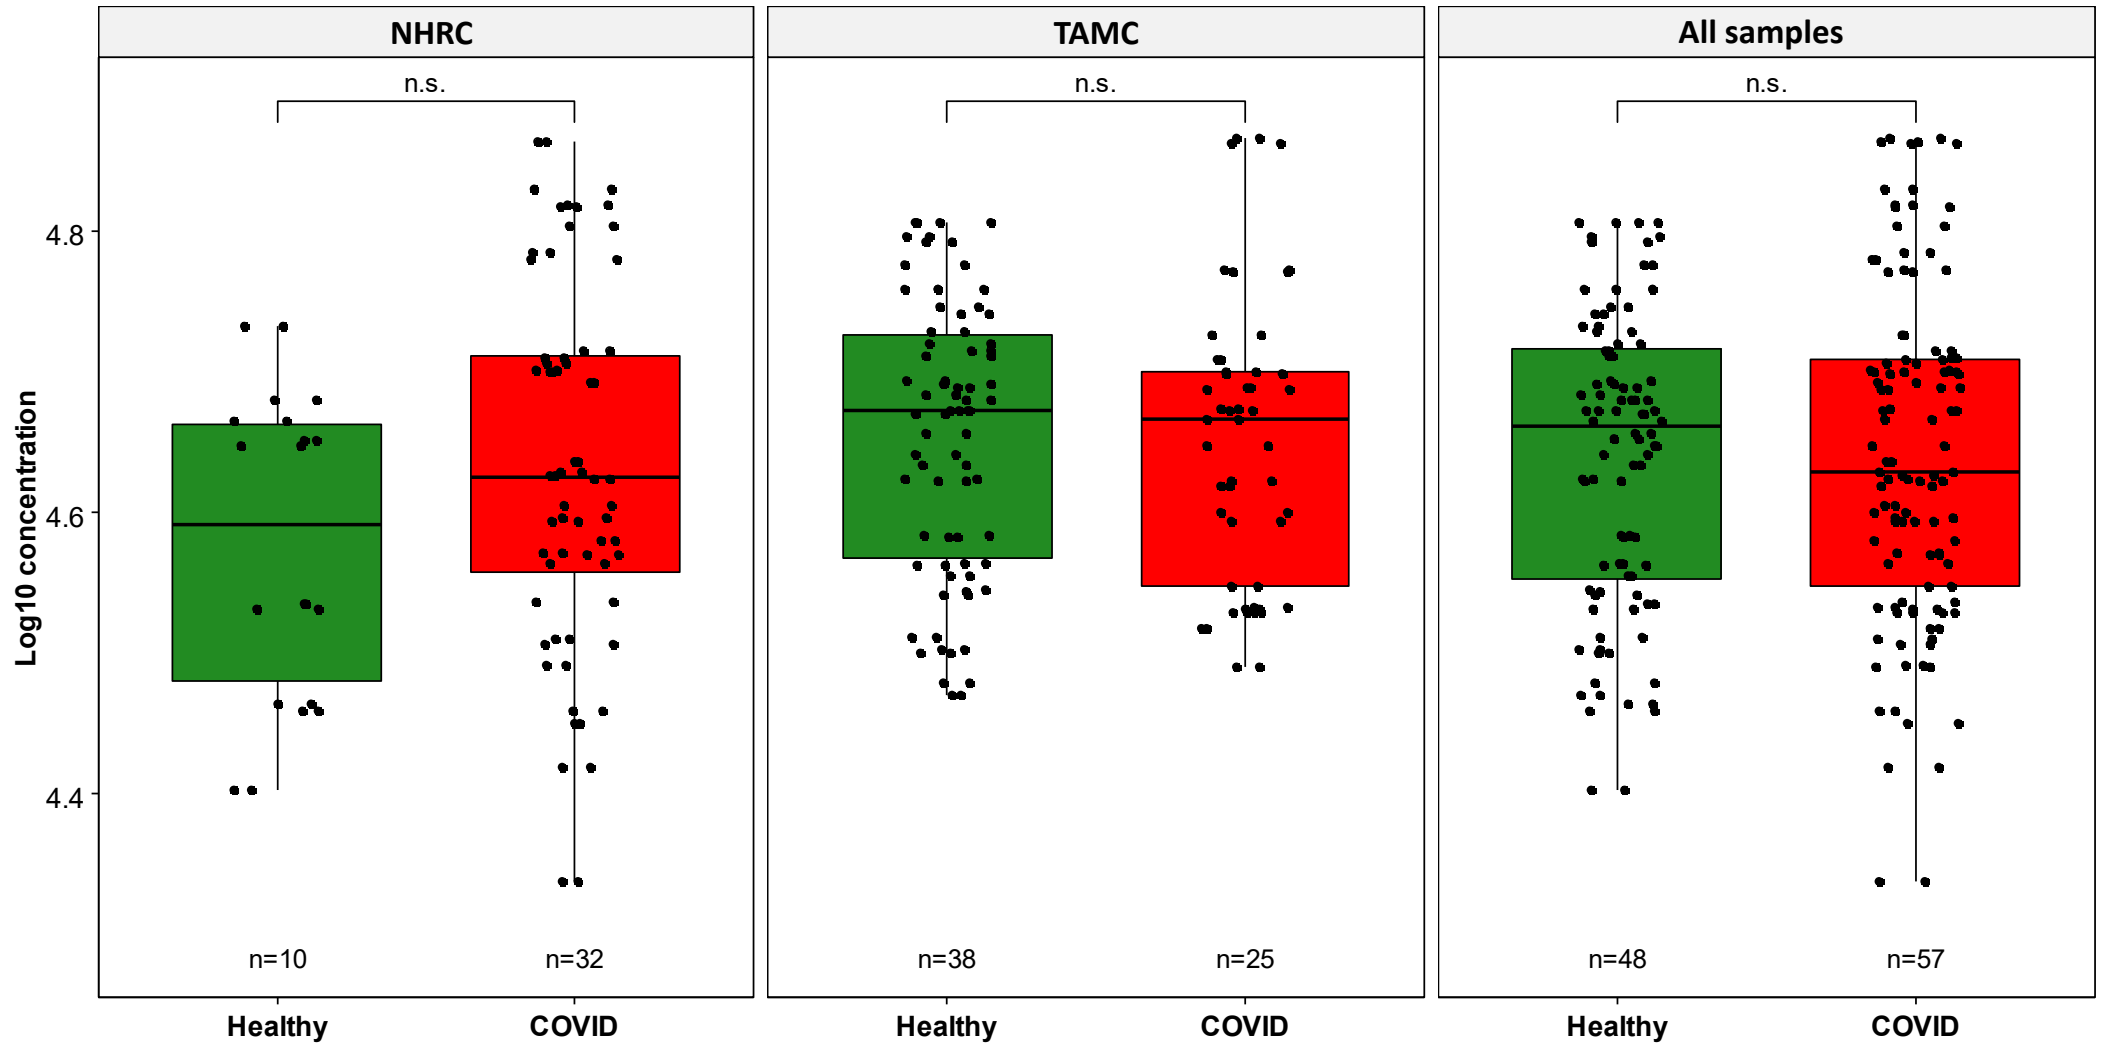

### IL-18BP<sub>a</sub> - Tasso SST serum at baseline

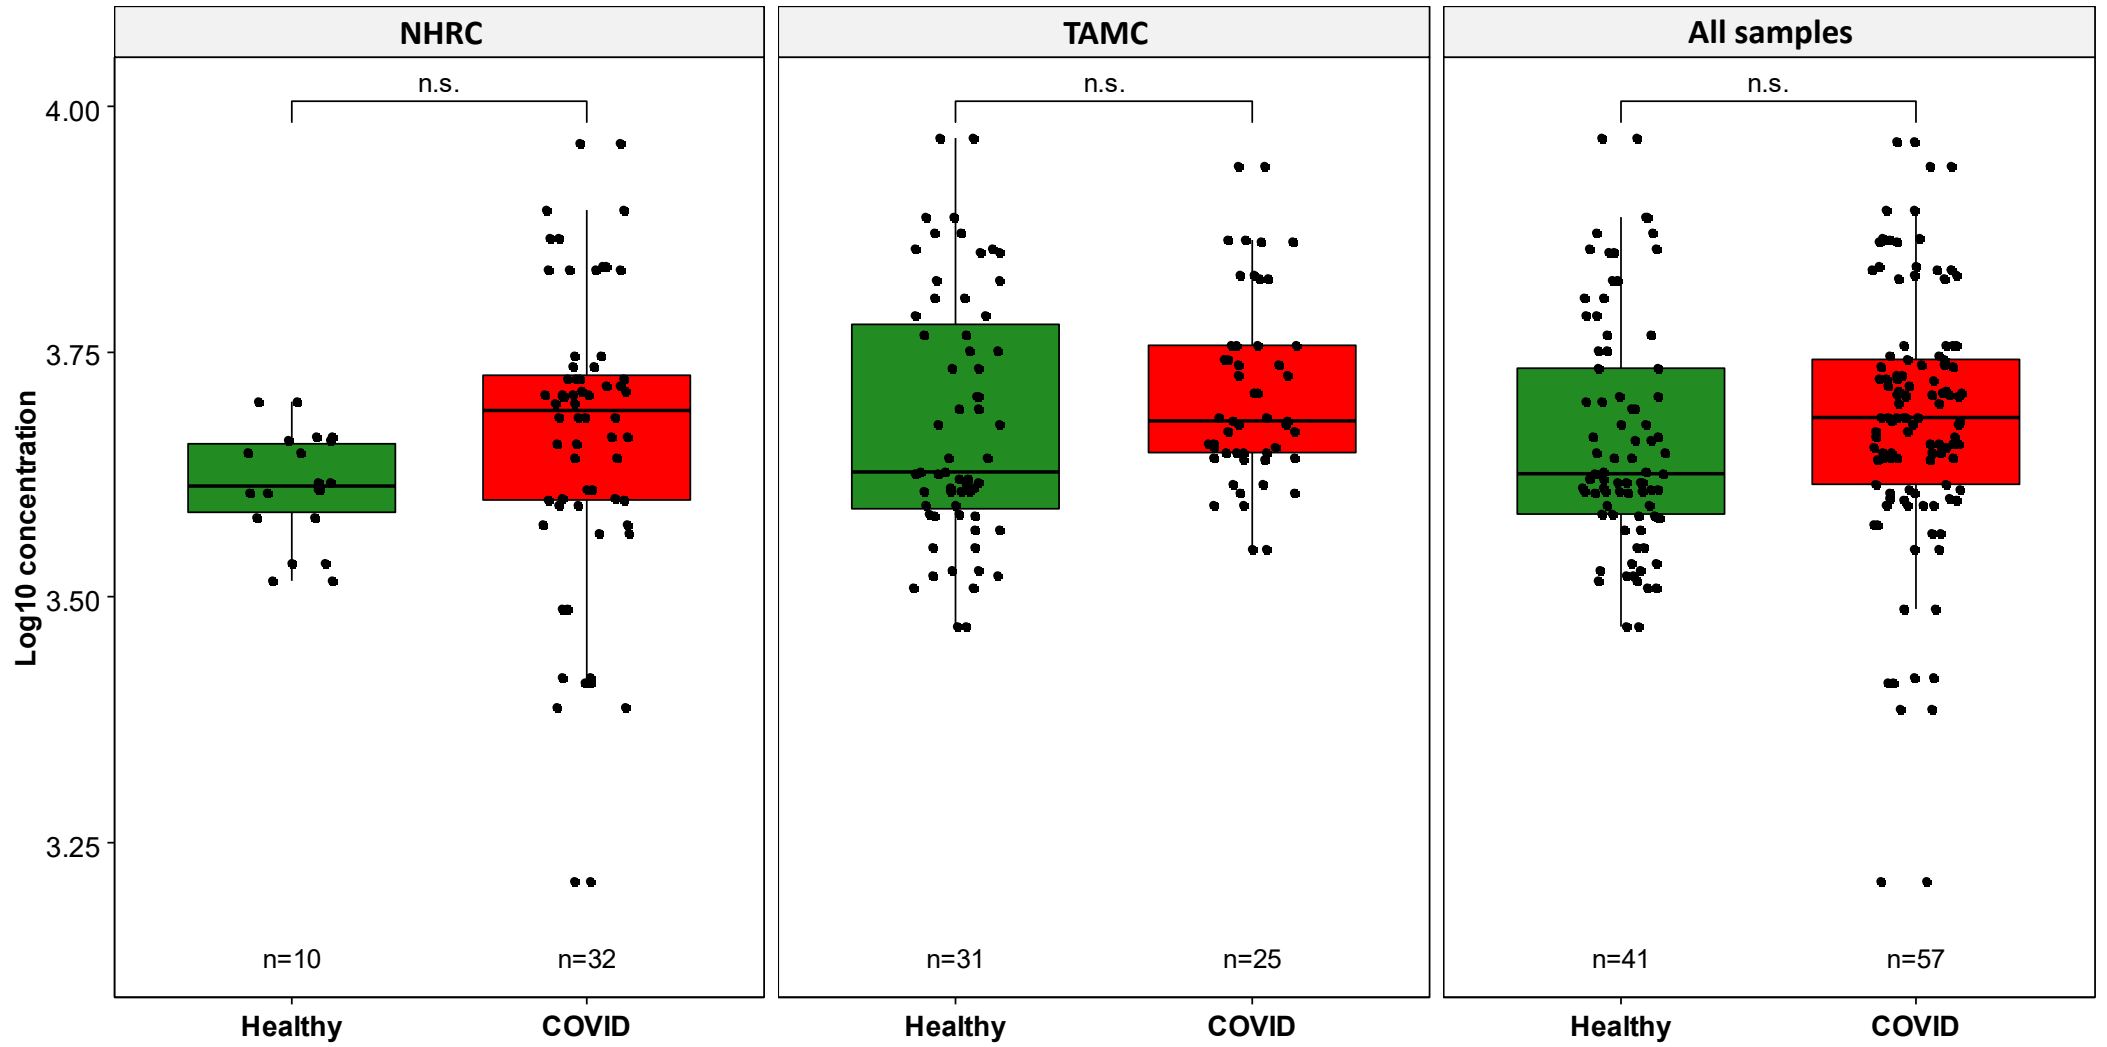

# LCN - Tasso SST serum at baseline

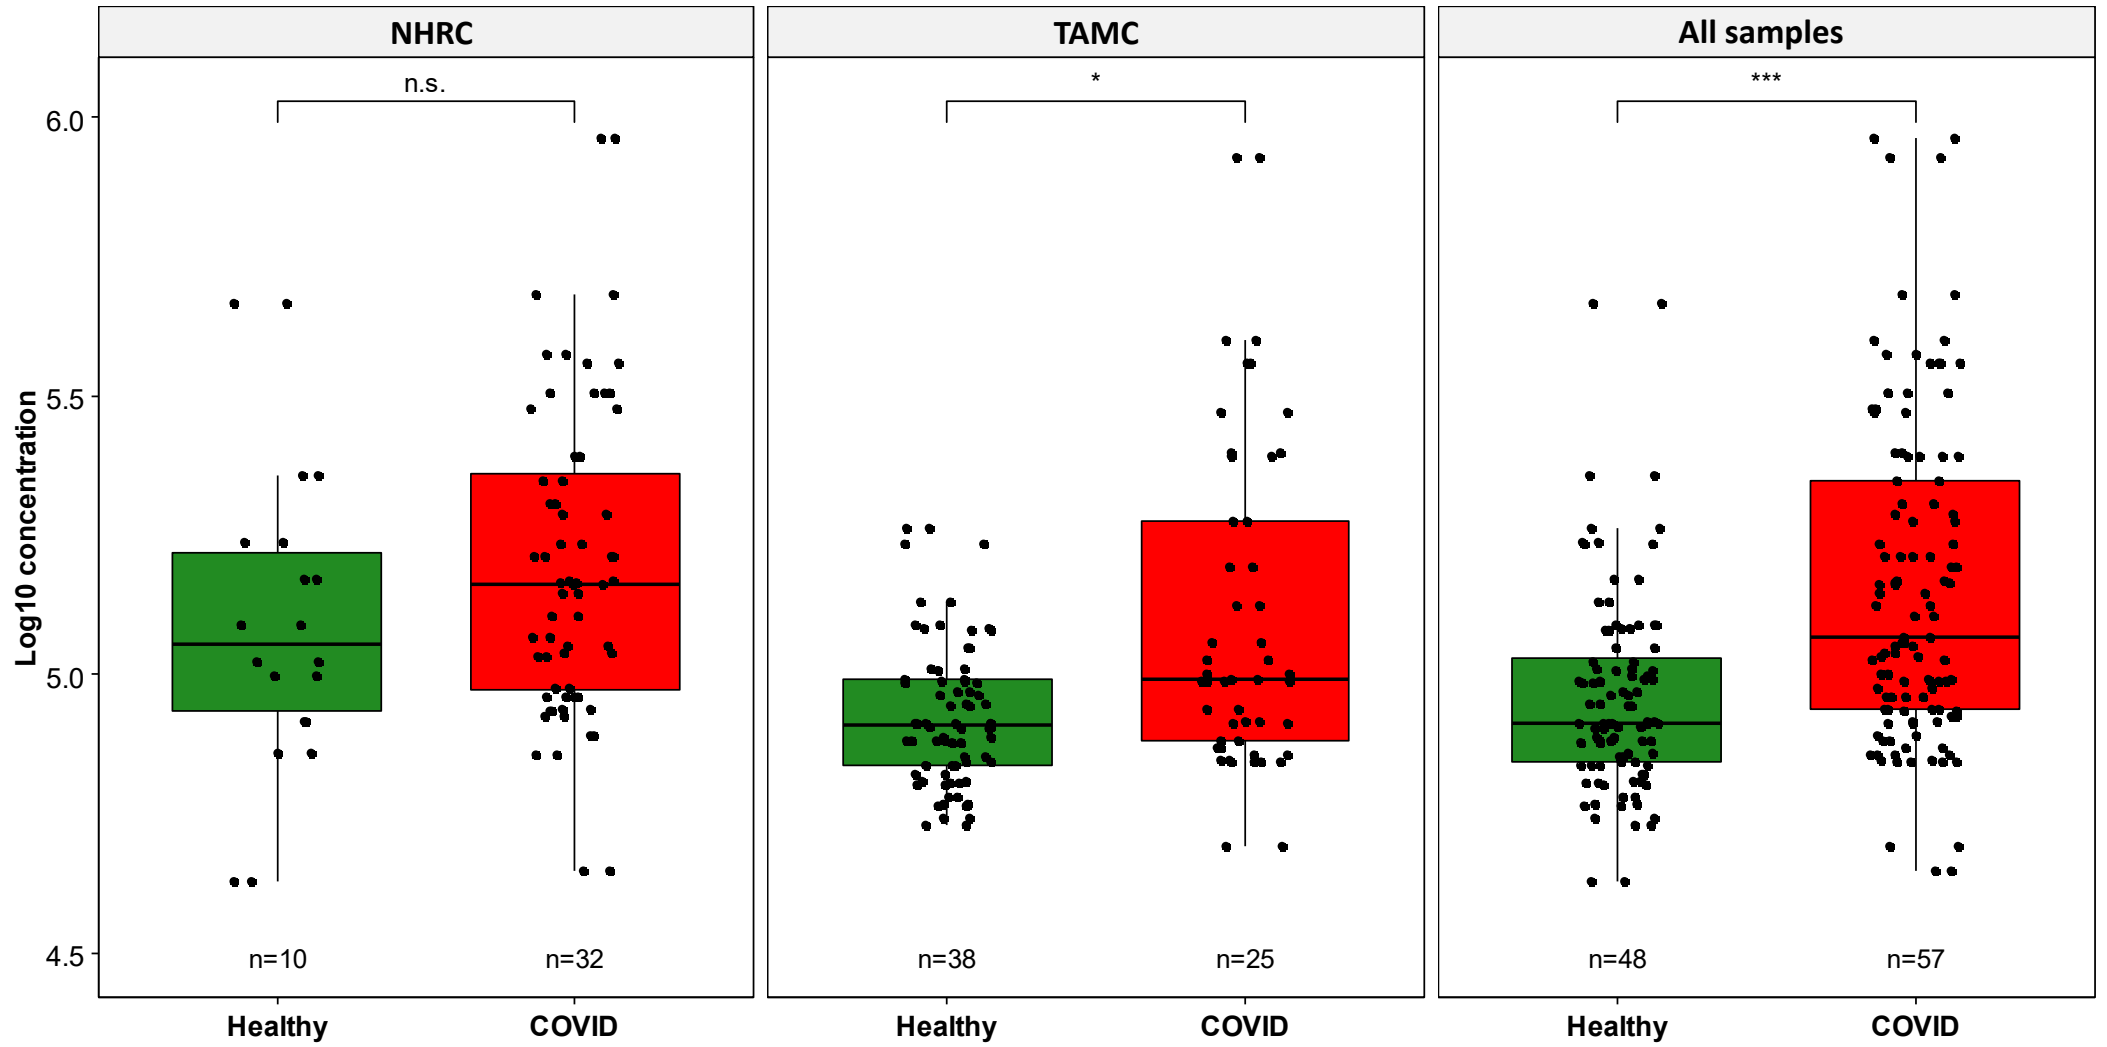

### PCT - Tasso SST serum at baseline

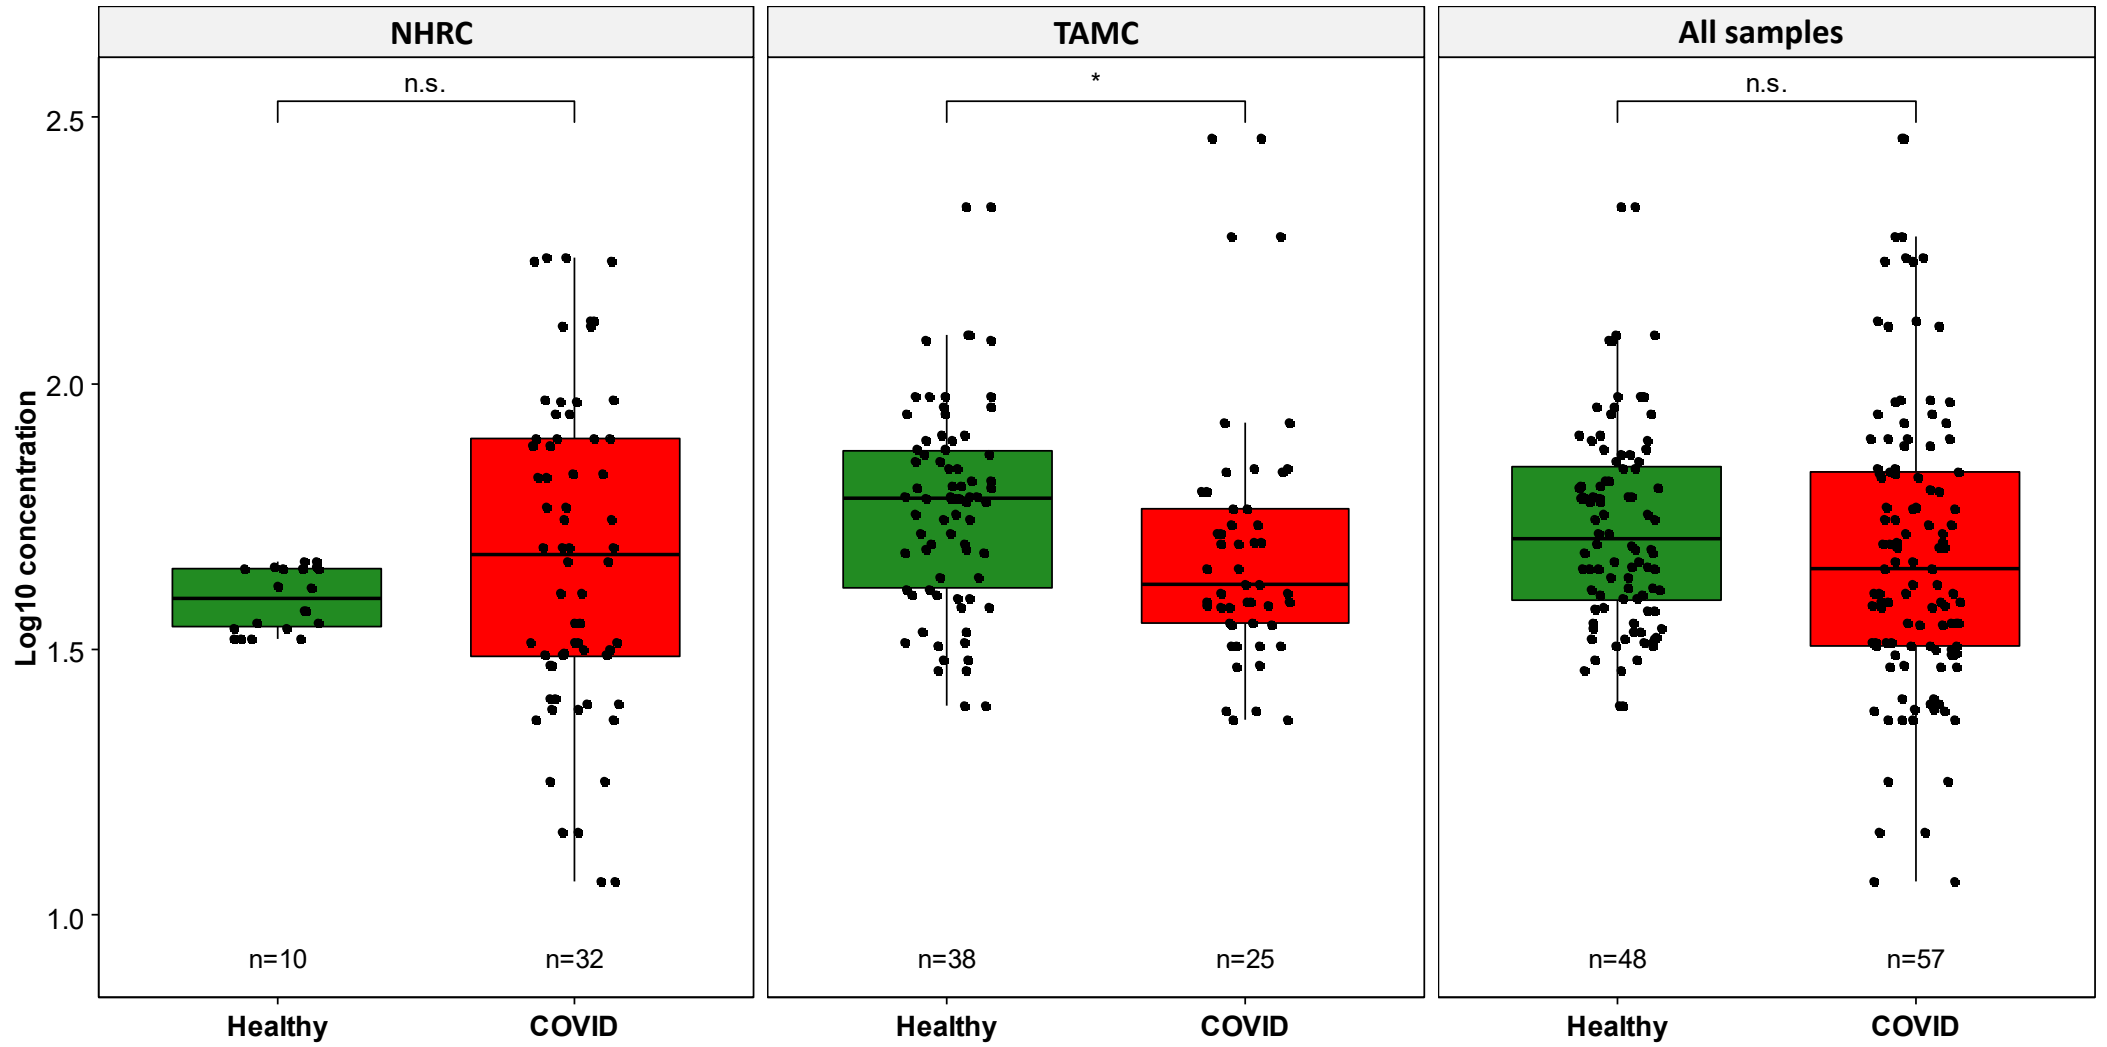

### RAGE - Tasso SST serum at baseline

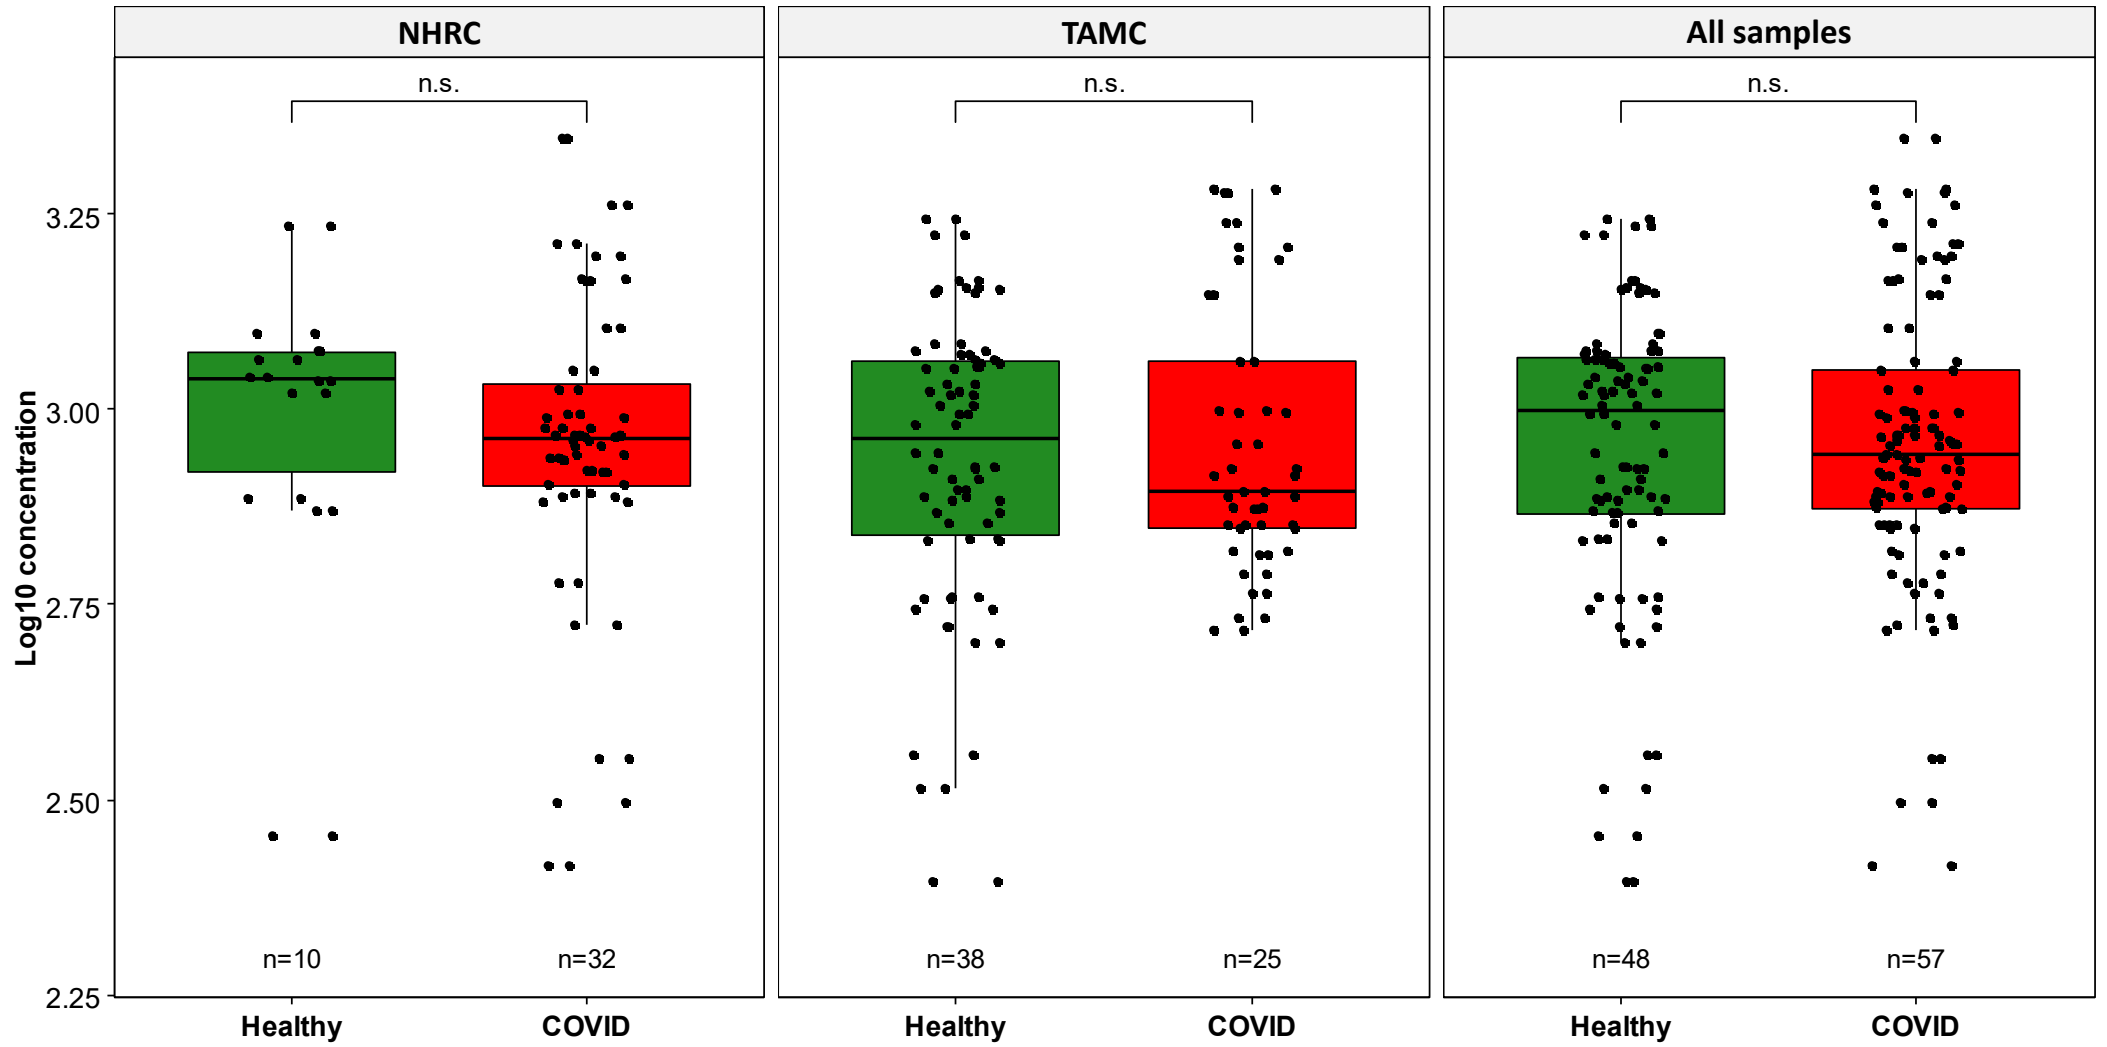

### TNF-R1 - Tasso SST serum at baseline

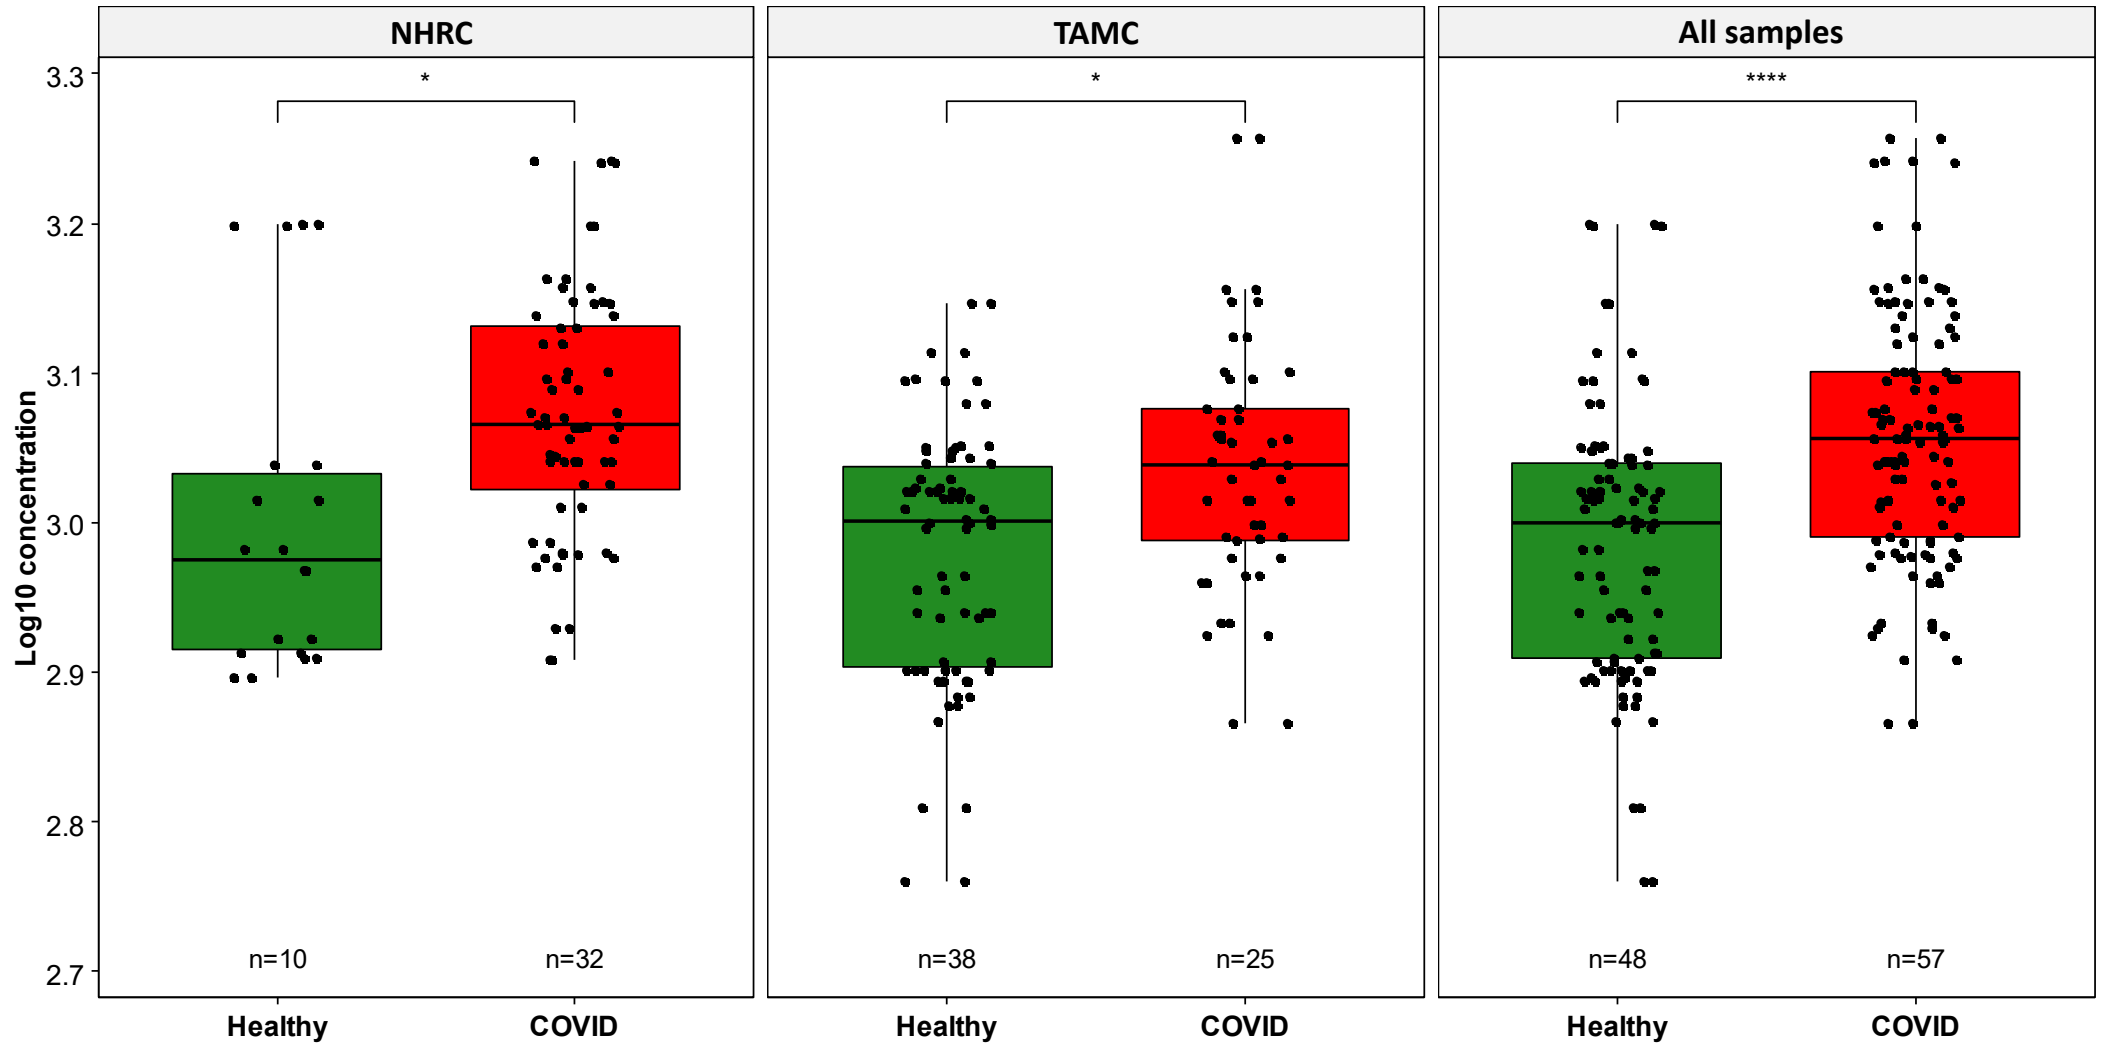



# VEGF-A - Tasso SST serum at baseline

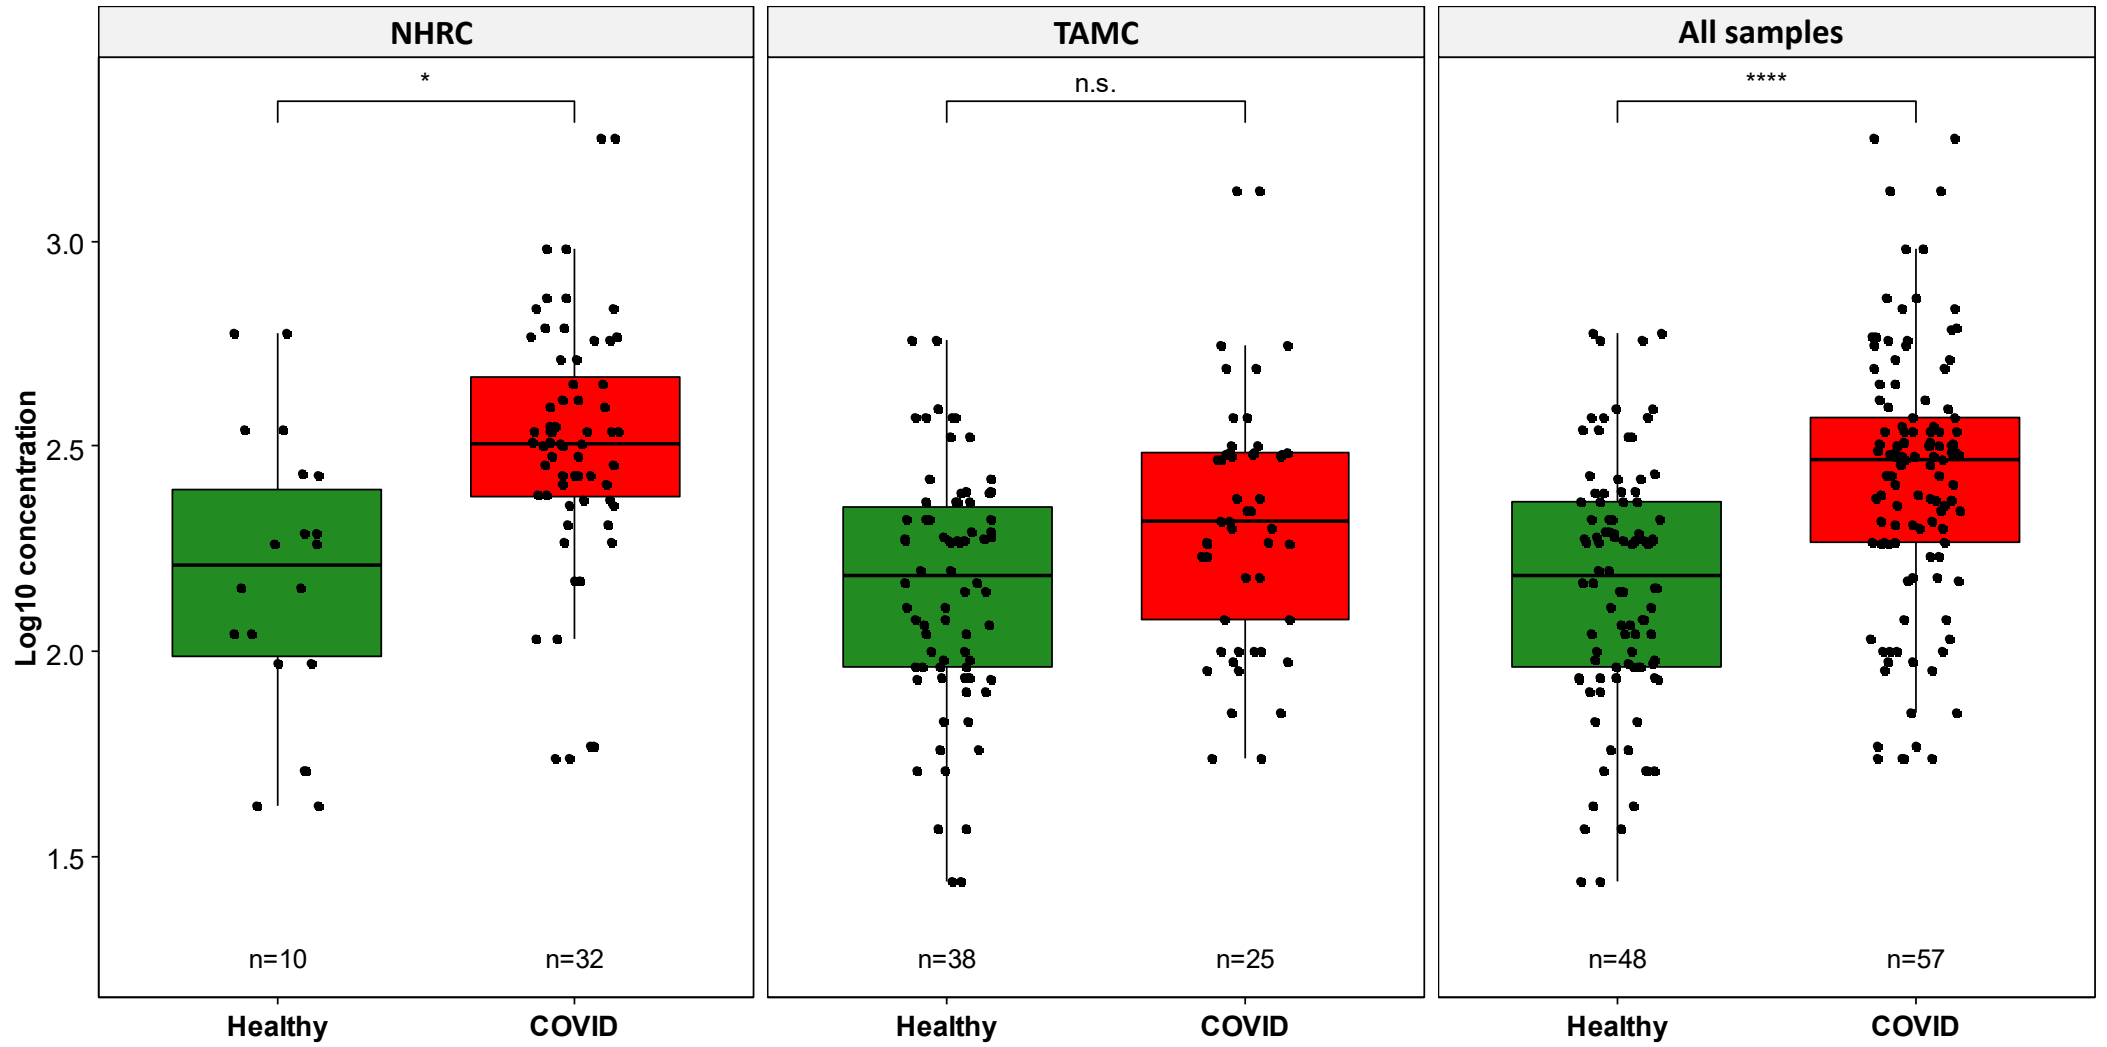

Supplement: pone.0272572.s007.pdf [file pone.0272572.s007.pdf]
