# Supplementary material for: Assessing the use of a micro-sampling device for measuring blood protein levels in healthy subjects and COVID-19 patients
Source: PubMed Central journal article supplement (PMC9365123; doi:10.1371/journal.pone.0272572), 2022-08-10
Supplement: pone.0272572.s001.pdf [file pone.0272572.s001.pdf]

|               | Healthy control |            | COVID-19   |            |
|---------------|-----------------|------------|------------|------------|
|               | TAMC            | NHRC       | TAMC       | NHRC       |
| <b>Gender</b> | 15M/26F         | 7M/8F      | 18M/6F     | 16M/16F    |
| <b>Age</b>    | 35 (20-64)      | 36 (22-53) | 29 (19-59) | 32 (15-71) |
| <b>Race</b>   | 26W/14O         | 11W/4O     | 12W/12O    | 22W/10O    |
