# Supplementary material for: Assessing the use of a micro-sampling device for measuring blood protein levels in healthy subjects and COVID-19 patients
Source: PubMed Central journal article supplement (PMC9365123; doi:10.1371/journal.pone.0272572), 2022-08-10
Supplement: pone.0272572.s002.pdf [file pone.0272572.s002.pdf]

**Agreement and bias in matched samples from healthy controls  
TAMC in-clinic supervised collection - all time points**

| Analyte         | N    | Tasso SST serum vs Venous serum |                        | Tasso SST serum vs Venous plasma |                        | Venous serum vs Venous plasma |                    |
|-----------------|------|---------------------------------|------------------------|----------------------------------|------------------------|-------------------------------|--------------------|
|                 |      | R <sup>2</sup>                  | Fixed bias             | R <sup>2</sup>                   | Fixed bias             | R <sup>2</sup>                | Fixed bias         |
| <b>CRP</b>      | 183  | 0.98                            | Tasso SST lower (<1%)  | 0.98                             | Not significant        | 0.98                          | Serum higher (<1%) |
| <b>PCT</b>      | 183  | 0.96                            | Tasso SST higher (1%)  | 0.96                             | Tasso SST higher (1%)  | 0.98                          | Not significant    |
| <b>Ferritin</b> | 183  | 0.92                            | Tasso SST higher (2%)  | 0.92                             | Tasso SST higher (3%)  | 0.98                          | Serum higher (<1%) |
| <b>IL-18BPα</b> | 152  | 0.90                            | Tasso SST lower (<1%)  | 0.88                             | Not significant        | 0.90                          | Serum higher (<1%) |
| <b>CD163</b>    | 152  | 0.88                            | Not significant        | 0.88                             | Tasso SST higher (<1%) | 0.92                          | Serum higher (<1%) |
| <b>CXCL10</b>   | 152  | 0.88                            | Tasso SST higher (3%)  | 0.86                             | Tasso SST higher (7%)  | 0.90                          | Serum higher (5%)  |
| <b>RAGE</b>     | 183  | 0.81                            | Tasso SST lower (<1%)  | 0.79                             | Tasso SST lower (1%)   | 0.92                          | Not significant    |
| <b>IL-6Ra</b>   | 183  | 0.76                            | Tasso SST lower (<1%)  | 0.76                             | Tasso SST lower (<1%)  | 0.77                          | Serum lower (<1%)  |
| <b>ICAM-1</b>   | 183  | 0.74                            | Tasso SST lower (<1%)  | 0.72                             | Not significant        | 0.81                          | Serum higher (<1%) |
| <b>TNF-R1</b>   | 183  | 0.64                            | Tasso SST higher (1%)  | 0.61                             | Tasso SST higher (2%)  | 0.64                          | Serum higher (1%)  |
| <b>IL-6</b>     | 183  | 0.62                            | Tasso SST higher (29%) | 0.63                             | Tasso SST higher (21%) | 0.89                          | Not significant    |
| <b>VEGF-A</b>   | 183  | 0.59                            | Tasso SST higher (7%)  | 0.36                             | Tasso SST higher (37%) | 0.42                          | Serum higher (30%) |
| <b>LCN</b>      | 183  | 0.53                            | Not significant        | 0.61                             | Tasso SST higher (1%)  | 0.67                          | Serum higher (1%)  |
| <b>IL-5</b>     | 152* | 0.41                            | Not significant        | 0.34                             | Tasso SST lower (40%)  | 0.64                          | Serum lower (50%)  |
| <b>D-dimer</b>  | 183  | 0.18                            | Tasso SST higher (5%)  | 0.14                             | Not significant        | 0.79                          | Serum lower (5%)   |
| <b>IL-1B</b>    | 24*  | 0.12                            | Not significant        | 0.04                             | Tasso SST higher (83%) | 0.38                          | Serum higher (58%) |
| <b>IL-1Ra</b>   | 183  | 0.02                            | Tasso SST higher (27%) | 0.06                             | Tasso SST higher (31%) | 0.66                          | Serum higher (4%)  |
