# Supplementary material for: Assessing the use of a micro-sampling device for measuring blood protein levels in healthy subjects and COVID-19 patients
Source: PLoS One. 2022 Aug 10;17(8):e0272572. doi: 10.1371/journal.pone.0272572 (PMC9365123; doi:10.1371/journal.pone.0272572)
Supplement: S1 Data — Summary table of the data and metadata used in this study, including: Ella protein concentrations (in pg/ml), sample information (sample type and study time point), and selected subject information (sex, race, age, study site and COVID-19 status at the time of sampling). (XLSX) [file pone.0272572.s003.xlsx]

## Sheet: Data summary
SUBJECT INFORMATION						SAMPLE INFO		PROTEIN CONCENTRATIONS [pg/ml]
Subject ID	Sex	Race	Age	Site	Status	Time point	Sample type	CD163	CRP	CXCL10	D-dimer	Ferritin	ICAM-1	IL-1B	IL-1Ra	IL-5	IL-6	IL-6Ra	IL-18BPa	LCN	PCT	RAGE	TNF-R1	VEGF-A
N1000	Female	White	41	NHRC	Healthy	T00d	Tasso SST serum	346869	2.26312e+06	91.5	5.44996e+06	47044	253736	1.22	1528	0.437	1.05	25284	4042	42633	33	1098	788	110
N1000	Female	White	41	NHRC	Healthy	T03d	Tasso SST serum	324759	1.21385e+06	98.6	3.63326e+06	44034	250846	0.808	1776	0.305	0.898	25603	3866	76482	29.9	1245	785	98.5
N1000	Female	White	41	NHRC	Healthy	T07d	Tasso SST serum	358986	1.57585e+06	72.2	7.62122e+06	64436	272907	1.34	4137	0.315	1.55	30281	3179	147013	33.2	836	666	131
N1000	Female	White	41	NHRC	Healthy	T14d	Tasso SST serum	327741	1.48228e+06	83.2	1.95762e+06	66869	252419	3.57	2982	0.32	0.867	26175	3835	128989	35.8	717	718	129
N1000	Female	White	41	NHRC	Healthy	T28d	Tasso SST serum	399578	2.71255e+06	96.2	9.94718e+06	53082	273387	0.438	2039	0.398	1.22	26180	3482	77922	35.5	1095	667	112
N1002	Female	White	22	NHRC	Healthy	T00d	Tasso SST serum	447095	4.15932e+06	170	4.63088e+08	161732	386577	0.295	1461	0.391	1.37	47940	4564	99355	45.1	1718	1094	183
N1003	Male	White	25	NHRC	Healthy	T03d	Tasso SST serum	628473	474692	71.4	871232	81402	344764	1.71	2539	0.094	2.22	44107	3500	125397	36.3	2025	1242	245
N1003	Male	White	25	NHRC	Healthy	T07d	Tasso SST serum	474683	471524	95.5	841781	52686	328934	0.618	958	0.159	1.51	41925	3598	91053	40.7	2547	1105	199
N1003	Male	White	25	NHRC	Healthy	T14d	Tasso SST serum	425201	267289	86.8	404304	49599	253855	0.658	1230	0.415	1.7	33537	3153	85023	36.3	2244	1051	238
N1004	Female	Black / African American	39	NHRC	Healthy	T03d	Tasso SST serum	522241	380435	57.2	4.63088e+08	71927	243595	4.035	7544	0.10298	2.37	24468	2622	325005	35.6	721.339	1077	352.093
N1004	Female	Black / African American	39	NHRC	Healthy	T14d	Tasso SST serum	500644	255079	58.3	4.63088e+08	47978	235849	7.38	5213	0.322	0.938	24558	3408	245716	25.7	500	1247	227
N1004	Female	Black / African American	39	NHRC	Healthy	T28d	Tasso SST serum	691122	774130	86.9	2.19802e+08	59753	263695	1.96	4620	0.218	0.588	26756	4334	133943	35.4	861	1115	146
N1005	Female	White	53	NHRC	Healthy	T00d	Tasso SST serum	513984	4.43548e+06	82.5	5.61577e+07	102531	284324	3.31	4047	0.225	2.3	44417	3807	123215	33.2	1254	819	143
N1005	Female	White	53	NHRC	Healthy	T03d	Tasso SST serum	513345	2.04461e+06	71	4.63088e+08	88874	298111	5.22	2246	1.79	2.28	43660	4566	99612	38.1	1238	792	135
N1005	Female	White	53	NHRC	Healthy	T07d	Tasso SST serum	512243	2.87546e+06	82.7	7.1341e+06	100441	288955	0.782	2157	0.461	1.6	46209	4237	66270	38.6	1290	646	100
N1005	Female	White	53	NHRC	Healthy	T28d	Tasso SST serum	559934	2.62161e+06	99.2	6.03263e+06	99260	297287	5.13	2049	2.24	2.95	49268	2541	63023	43.2	865	1030	133
N1006	Female	White	53	NHRC	Healthy	T00d	Tasso SST serum	370325	228557	97.4	1.84379e+07	60821	266240	2.23	2124	0.776	1.67	34036	3291	105229	35.4	284	1036	41.9
N1006	Female	White	53	NHRC	Healthy	T03d	Tasso SST serum	489061	206891	92.4	6.35692e+06	71268	241547	4.03	3655	0.619	1.51	30237	4797	160027	20.2	1375	835	95.5
N1006	Female	White	53	NHRC	Healthy	T07d	Tasso SST serum	374730	306074	92	1.35301e+07	40285	259293	1.72	1063	0.487	2.09	29105	4164	101447	34.9	1422	1140	112
N1006	Female	White	53	NHRC	Healthy	T14d	Tasso SST serum	422363	2069596	69.3	6.31114e+06	65685	250871	117	2238	42.4	3.84	28181	2765	88266	30.2	1124	1004	315
N1006	Female	White	53	NHRC	Healthy	T28d	Tasso SST serum	401267	272134	95.7	2.03553e+07	48775	249589	3.27	1902	1.52	3.08	26974	2247	108061	30.7	875	956	125
N1007	Male	Native Hawaiian / Pacific Islander	40	NHRC	Healthy	T28d	Tasso SST serum	468202	857939	155	1.59275e+06	772138	247292	4.24	1638	2.3	1.49	43383	2042	66676	55.1	1055	892	656
N1008	Female	Native Hawaiian / Pacific Islander	31	NHRC	Healthy	T00d	Tasso SST serum	576304	185881	123	2.84956e+07	16123	240556	0.16	1557	0.415	2.47	34252	4073	82179	37.5	1185	930	51.3
N1008	Female	Native Hawaiian / Pacific Islander	31	NHRC	Healthy	T03d	Tasso SST serum	467798	289027	132	8.12156e+06	19377	193963	0.443	1430	0.718	1.69	32110	2528	71969	40.1	979	762	59.8
N1008	Female	Native Hawaiian / Pacific Islander	31	NHRC	Healthy	T07d	Tasso SST serum	403258	209672	130	9.35389e+06	29546	162732	1.00512	874	0.702954	1.45	28167	2007	43763	48.5	778.544	897	121.877
N1009	Male	White	30	NHRC	Healthy	T00d	Tasso SST serum	403276	1.76139e+06	71.4	5.28274e+06	315473	285856	1.25	1288	0.163	1.7	29092	3420	72183	41.4	1049	837	93.5
N1009	Male	White	30	NHRC	Healthy	T03d	Tasso SST serum	468519	2.32111e+06	80.2	1.51759e+06	316297	306480	8.63	1985	1.95	1.4	34669	2222	86632	33.9	812	892	107
N1009	Male	White	30	NHRC	Healthy	T07d	Tasso SST serum	501448	1.97935e+06	69.9	2.63767e+06	296993	293305	2.3	1925	0.115	1.47	31834	4047	77788	45.9	958	923	74.7
N1010	Male	White	42	NHRC	Healthy	T00d	Tasso SST serum	443148	329153	120	4.20989e+08	54950	368215	0.789	2130	0.074	1.29	44887	4134	148670	46.2	1085	812	194
N2000	Male	White	40	NHRC	Healthy	T00d	Tasso SST serum	337979	502338	226	4.63088e+08	157342	264403	89.7	7636	0.101	1251	46307	4447	464283	34.7	769	1579	600
N2000	Male	White	40	NHRC	Healthy	T03d	Tasso SST serum	315443	807051	199	4.63088e+08	193058	253690	12.1	6456	0.156	74.7	50581	6178	947663	23.7	721	1936	573
N2001	Female	White	27	NHRC	Healthy	T03d	Tasso SST serum	392542	1364350	82.8	4.63088e+08	118149	210766	1065	20360	0.092	9936	42785	4795	569799	16.1	1498	1621	1286
N2002	Female	Other / Mixed	28	NHRC	Healthy	T00d	Tasso SST serum	680902	8.09473e+06	125	4.63088e+08	52268	249020	4.03	4515	0.301	2.28	28794	4607	227442	44.8	741	1582	270
N2002	Female	Other / Mixed	28	NHRC	Healthy	T07d	Tasso SST serum	661771	7.94702e+06	160	1.70542e+08	56700	229211	53.4	4763	21.3	15.1	28185	4538	274030	44.5	676	1256	501
N2002	Female	Other / Mixed	28	NHRC	Healthy	T14d	Tasso SST serum	1210419	8.63767e+06	151	4.63088e+08	82498	409418	4.26	3582	0.225	3.53	48553	8834	178792	42.2	660	1121	239
N2002	Female	Other / Mixed	28	NHRC	Healthy	T28d	Tasso SST serum	834934	6.63412e+06	161	4.63088e+08	43208	299060	2.58	4360	0.104	2.31	30661	5125	219867	52.1	507	1168	205
N2003	Male	White	31	NHRC	Healthy	T00d	Tasso SST serum	414402	788170	118	4.63088e+08	444308	347553	2.7	5864	0.562	1.62	53998	5001	172354	44.7	1160	959	347
N2003	Male	White	31	NHRC	Healthy	T03d	Tasso SST serum	356488	1.15148e+06	101	6.13226e+07	362165	296774	0.956	3374	0.48	1.75	49665	4580	158030	48.4	1181	970	287
N2003	Male	White	31	NHRC	Healthy	T07d	Tasso SST serum	321990	639324	68.3	1.09596e+07	323688	273204	0.933	4114	0.456	2.14	44749	4419	122290	41.5	873	875	242
N2003	Male	White	31	NHRC	Healthy	T14d	Tasso SST serum	259282	809861	109	4.63088e+08	280489	268976	4.64	2379	2.38	1.65	43880	3808	117467	41.6	1114	946	276
N2004	Male	White	36	NHRC	Healthy	T03d	Tasso SST serum	571357	4.61442e+06	130	4.63088e+08	464224	257967	2.95	2468	0.455	2.36	38069	5315	223249	160	523	1596	343
N2004	Male	White	36	NHRC	Healthy	T07d	Tasso SST serum	585586	5.54912e+06	124	2.45991e+06	464740	257012	0.926	1076	0.305	1.55	35917	5651	101538	148	631	1322	258
N2004	Male	White	36	NHRC	Healthy	T14d	Tasso SST serum	610041	6.39976e+06	151	5.65993e+06	457519	257987	1.15	1823	0.231	1.83	40318	5662	90200	150	796	1341	206
N2004	Male	White	36	NHRC	Healthy	T28d	Tasso SST serum	249455	65809	135	1.04738e+07	19376	99673	2.29	2662	0.371	1.02	17726	2602	43121	22.8	1243	1208	345
T1000	Female	Other / Mixed	47	TAMC	Healthy	T00d	Tasso SST serum	NA	1735453	NA	2.46423e+06	79277	332121	0.21	1237	0.0009	1.87	36594	NA	71227	24.8	843	871	140
T1000	Female	Other / Mixed	47	TAMC	Healthy	T00d	Venous plasma	NA	1.67619e+06	NA	410373	64137	348932	0.975	217	0.089	1.93	39214	NA	61974	22.3	885	717	26.1
T1000	Female	Other / Mixed	47	TAMC	Healthy	T00d	Venous serum	NA	2.20259e+06	NA	268251	76788	411144	0.0009	300	0.0009	2.12	43271	NA	77036	25.1	852	871	77.6
T1000	Female	Other / Mixed	47	TAMC	Healthy	T03d	Tasso SST serum	321794	573276	88.2	1.99927e+06	43648	274944	0.389	1616	0.054	1.66	29719	3624	68196	30.5	1055	1068	131
T1000	Female	Other / Mixed	47	TAMC	Healthy	T03d	Venous plasma	358656	562257	59.3	333539	31172	275614	0.019	200	0.282	1.55	32666	3319	52796	27.9	1116	824	24.3
T1000	Female	Other / Mixed	47	TAMC	Healthy	T03d	Venous serum	418932	575046	93.9	211937	35374	299814	0.0009	874	0.129	1.59	34029	4022	65608	28.9	1275	913	123
T1000	Female	Other / Mixed	47	TAMC	Healthy	T07d	Tasso SST serum	331095	591783	96.9	4.63088e+08	35846	265080	0.128	934	0.025	1.65	28561	2866	63770	27.3	904	957	128
T1000	Female	Other / Mixed	47	TAMC	Healthy	T07d	Venous plasma	297261	380594	49.4	251350	28306	254110	0.0009	176	0.116	1.46	30200	2729	49492	21.6	761	762	25
T1000	Female	Other / Mixed	47	TAMC	Healthy	T07d	Venous serum	321529	407878	90.6	145813	35637	272737	0.0009	299	0.037	1.38	32421	3393	61172	25.5	814	816	119
T1000	Female	Other / Mixed	47	TAMC	Healthy	T14d	Tasso SST serum	274510	1.22446e+06	105	3.80513e+06	33531	252844	0.361	1131	0.099	3.38	30700	3257	73799	27.4	982	1014	138
T1000	Female	Other / Mixed	47	TAMC	Healthy	T14d	Venous plasma	291769	1.53593e+06	65.1	569439	27361	299870	0.0009	221	0.214	2.14	33927	3085	54138	23.9	1076	849	27.8
T1000	Female	Other / Mixed	47	TAMC	Healthy	T14d	Venous serum	362130	1.42858e+06	95.8	318175	27438	324648	0.0009	372	0.129	2.04	35200	3394	70274	24.3	1162	846	128
T1000	Female	Other / Mixed	47	TAMC	Healthy	T28d	Tasso SST serum	389577	1.21154e+06	109	462552	42340	309912	0.007	1073	0.0009	0.871	32914	2815	60955	29.4	1062	939	119
T1000	Female	Other / Mixed	47	TAMC	Healthy	T28d	Venous plasma	343571	1.13212e+06	52	391008	31085	303790	0.003	179	0.026	1.21	35990	2728	53267	25.1	980	706	18.7
T1000	Female	Other / Mixed	47	TAMC	Healthy	T28d	Venous serum	384851	1.16126e+06	81.7	229770	36357	347491	0.0009	236	0.0009	1.1	37048	2969	58707	28.9	1090	814	73.3
T1001	Male	Other / Mixed	35	TAMC	Healthy	T00d	Tasso SST serum	NA	380313	NA	74362	107060	357625	0.0009	1068	0.587	0.649	63970	NA	82027	63.6	679	871	85.1
T1001	Male	Other / Mixed	35	TAMC	Healthy	T00d	Venous plasma	NA	337427	NA	143773	83607	315791	0.049	128	0.845	0.65	55521	NA	70883	53.8	901	787	27.4
T1001	Male	Other / Mixed	35	TAMC	Healthy	T00d	Venous serum	NA	357013	NA	47947	91787	325269	0.0009	398	0.683	0.636	56369	NA	77709	53.7	797	808	102
T1001	Male	Other / Mixed	35	TAMC	Healthy	T03d	Tasso SST serum	NA	312228	NA	1.74614e+06	125266	303063	0.829	3645	0.568	0.874	57503	NA	120510	56.7	800	1118	123
T1001	Male	Other / Mixed	35	TAMC	Healthy	T03d	Venous plasma	NA	330824	NA	106941	82427	352663	0.108	109	0.704	0.855	57815	NA	80529	58.7	750	730	35.6
T1001	Male	Other / Mixed	35	TAMC	Healthy	T03d	Venous serum	NA	317705	NA	50631	84135	311615	0.0009	141	0.531	0.753	55736	NA	73440	58.3	715	767	91.6
T1001	Male	Other / Mixed	35	TAMC	Healthy	T07d	Tasso SST serum	NA	209960	NA	332859	126055	289190	0.111	2012	0.849	1.05	53829	NA	76825	40.7	853	955	99.1
T1001	Male	Other / Mixed	35	TAMC	Healthy	T07d	Venous plasma	NA	170925	NA	79264	99802	257906	0.0009	92.7	0.572	0.637	52428	NA	60567	53.2	813	746	22.8
T1001	Male	Other / Mixed	35	TAMC	Healthy	T07d	Venous serum	NA	246868	NA	41503	111558	290273	0.0009	115	0.469	0.646	58698	NA	71993	46.6	780	739	59
T1001	Male	Other / Mixed	35	TAMC	Healthy	T14d	Tasso SST serum	NA	235626	NA	754249	110803	231847	0.0009	1009	0.356	0.972	47583	NA	68735	49.2	855	950	77.6
T1001	Male	Other / Mixed	35	TAMC	Healthy	T14d	Venous plasma	NA	246030	NA	82758	96876	243208	0.012	93	0.314	0.721	49205	NA	64009	51.7	669	752	18.5
T1001	Male	Other / Mixed	35	TAMC	Healthy	T14d	Venous serum	NA	262676	NA	221753	105975	270114	0.0009	110	0.233	0.655	55481	NA	66918	54.1	751	783	53.4
T1001	Male	Other / Mixed	35	TAMC	Healthy	T28d	Tasso SST serum	NA	215395	NA	341247	106651	269718	0.0009	1041	0.324	0.673	50361	NA	77714	60.5	697	823	90.9
T1001	Male	Other / Mixed	35	TAMC	Healthy	T28d	Venous plasma	NA	223584	NA	119770	92728	302803	0.123	114	0.364	0.615	59705	NA	77925	65.3	674	779	27
T1001	Male	Other / Mixed	35	TAMC	Healthy	T28d	Venous serum	NA	184759	NA	49535	85806	231013	0.0009	159	0.219	0.665	44941	NA	68986	59.4	717	794	99.4
T1002	Female	White	64	TAMC	Healthy	T00d	Tasso SST serum	NA	634140	NA	672747	138633	232329	0.0009	1027	0.08	1.92	35045	NA	88523	59.9	1156	1200	79.4
T1002	Female	White	64	TAMC	Healthy	T00d	Venous plasma	NA	589242	NA	429058	96725	234487	0.117	194	0.33	1.52	35311	NA	71613	60.5	1142	1110	24.5
T1002	Female	White	64	TAMC	Healthy	T00d	Venous serum	NA	704537	NA	192461	95669	276107	0.0009	310	0.055	1.6	41790	NA	99606	58.5	1160	1279	91.9
T1002	Female	White	64	TAMC	Healthy	T03d	Tasso SST serum	NA	819566	NA	173874	129763	257416	0.0009	1168	0.061	1.64	40951	NA	83996	74.5	1261	1175	72.3
T1002	Female	White	64	TAMC	Healthy	T03d	Venous plasma	NA	768849	NA	352243	91696	267485	0.385	194	0.257	1.51	41558	NA	76766	73.9	1388	1024	29.4
T1002	Female	White	64	TAMC	Healthy	T03d	Venous serum	NA	900210	NA	184348	108250	290803	0.0009	345	0.06	1.46	43685	NA	101103	74.1	1341	1059	82.3
T1002	Female	White	64	TAMC	Healthy	T07d	Tasso SST serum	NA	681897	NA	221397	120074	267393	0.042	1127	0.046	1.58	38641	NA	89581	66.8	1158	1146	86.1
T1002	Female	White	64	TAMC	Healthy	T07d	Venous plasma	NA	731678	NA	398442	114106	293578	0.094	227	0.228	6.95	46655	NA	85208	68.5	1329	1038	44.6
T1002	Female	White	64	TAMC	Healthy	T07d	Venous serum	NA	784665	NA	171654	112395	306338	0.0009	489	0.085	2.39	42785	NA	134632	68	1202	1270	117
T1002	Female	White	64	TAMC	Healthy	T14d	Tasso SST serum	NA	771992	NA	162248	137118	291574	0.054	1418	0.095	1.67	44629	NA	88514	75.3	1170	1241	86
T1002	Female	White	64	TAMC	Healthy	T14d	Venous plasma	NA	637640	NA	361507	104226	242236	0.622	186	0.208	1.71	39073	NA	73746	74.7	1393	1023	27.5
T1002	Female	White	64	TAMC	Healthy	T14d	Venous serum	NA	682361	NA	150956	118420	267254	0.0009	298	0.125	1.72	41957	NA	87376	78.1	1334	1246	72.8
T1002	Female	White	64	TAMC	Healthy	T28d	Tasso SST serum	NA	626121	NA	167492	121601	262483	0.071	654	0.164	1.52	43126	NA	87067	65	1270	1131	66.7
T1002	Female	White	64	TAMC	Healthy	T28d	Venous plasma	NA	595071	NA	351800	98135	276382	0.464	211	0.24	2.01	45989	NA	75674	66.3	1251	1054	32.9
T1002	Female	White	64	TAMC	Healthy	T28d	Venous serum	NA	586521	NA	154700	91899	251112	0.0009	252	0.105	2.11	38318	NA	79509	64.3	1280	1075	59.4
T1003	Female	Asian	45	TAMC	Healthy	T03d	Tasso SST serum	269566	106229	122	100225	173987	267514	0.0009	2197	0.004	0.81	32066	3126	63222	30.2	835	648	272
T1003	Female	Asian	45	TAMC	Healthy	T03d	Venous plasma	268056	101056	79.6	200682	159062	264817	0.069	184	0.125	0.843	33936	2873	47127	28.7	902	576	27.3
T1003	Female	Asian	45	TAMC	Healthy	T03d	Venous serum	302266	111281	90.4	98431	175036	311646	0.0009	213	0.0009	0.938	33697	3159	51531	26.8	1005	609	104
T1003	Female	Asian	45	TAMC	Healthy	T07d	Tasso SST serum	258602	383033	157	143897	339122	256663	0.0009	2387	0.001	0.986	28628	3024	48543	50.5	913	790	232
T1003	Female	Asian	45	TAMC	Healthy	T07d	Venous plasma	300517	459784	108	246816	225452	296498	0.157	212	0.071	0.807	35222	3339	57019	45.3	892	644	33.8
T1003	Female	Asian	45	TAMC	Healthy	T07d	Venous serum	315206	448704	106	168695	186323	307670	0.0009	226	0.0009	0.849	34719	3359	54732	45.4	969	675	56.3
T1003	Female	Asian	45	TAMC	Healthy	T14d	Tasso SST serum	233832	132240	196	95131	123229	236170	0.0009	1966	0.026	0.577	26506	2961	47718	32.4	1155	766	216
T1003	Female	Asian	45	TAMC	Healthy	T14d	Venous plasma	250398	124513	161	169339	107568	259441	0.0009	176	0.091	0.566	30601	3289	48906	28	1336	652	31.6
T1003	Female	Asian	45	TAMC	Healthy	T14d	Venous serum	253876	149914	172	310555	129401	251884	0.0009	217	0.0009	0.386	30671	3769	55194	26.7	1271	595	104
T1003	Female	Asian	45	TAMC	Healthy	T28d	Tasso SST serum	234360	147891	135	76480	137152	227352	0.0009	1752	0.0009	0.456	27274	3253	52954	37.3	1132	766	212
T1003	Female	Asian	45	TAMC	Healthy	T28d	Venous plasma	257224	182620	104	181906	130186	263418	0.048	185	0.193	0.499	33607	3651	52120	33.2	1291	688	35.7
T1003	Female	Asian	45	TAMC	Healthy	T28d	Venous serum	272686	171730	106	95689	127771	287070	0.0009	204	0.0009	0.425	29804	3454	56704	31.4	1325	623	85.2
T1004	Male	White	39	TAMC	Healthy	T00d	Tasso SST serum	NA	2.73217e+06	NA	1.07224e+06	167326	374502	2.42	2291	0.295	0.73	49209	NA	77191	90.4	764	808	191
T1004	Male	White	39	TAMC	Healthy	T00d	Venous plasma	NA	3.30755e+06	NA	265455	153883	396963	0.188	235	0.252	0.667	53120	NA	70956	93	622	569	29.6
T1004	Male	White	39	TAMC	Healthy	T00d	Venous serum	NA	2.69828e+06	NA	382758	149090	386649	0.0009	306	0.059	0.737	53430	NA	82261	93.4	658	731	255
T1004	Male	White	39	TAMC	Healthy	T03d	Tasso SST serum	NA	2.46267e+06	NA	442621	183783	386300	2.41	2682	0.243	0.781	51775	NA	79147	90.8	771	743	209
T1004	Male	White	39	TAMC	Healthy	T03d	Venous plasma	NA	2.65105e+06	NA	310078	175473	408087	0.15	226	0.159	0.856	54800	NA	75898	85.8	722	734	21.8
T1004	Male	White	39	TAMC	Healthy	T03d	Venous serum	NA	2.41621e+06	NA	186995	184854	406294	0.0009	405	0.052	0.929	54957	NA	88199	88	686	851	226
T1004	Male	White	39	TAMC	Healthy	T07d	Tasso SST serum	NA	2.38959e+06	NA	4.0856e+06	166639	340852	1.18	2089	0.29	1.55	45199	NA	72286	105	1047	845	234
T1004	Male	White	39	TAMC	Healthy	T07d	Venous plasma	NA	2.50263e+06	NA	491308	143814	359810	0.079	175	0.185	0.749	49277	NA	70460	121	684	756	18.8
T1004	Male	White	39	TAMC	Healthy	T07d	Venous serum	NA	2.26858e+06	NA	307528	151653	353684	0.0009	230	0.063	0.838	44882	NA	67749	113	772	764	142
T1004	Male	White	39	TAMC	Healthy	T14d	Tasso SST serum	NA	1.95271e+06	NA	398807	212201	335202	1.22	1549	0.264	0.884	43249	NA	71948	107	868	999	211
T1004	Male	White	39	TAMC	Healthy	T14d	Venous plasma	NA	1925494	NA	385817	154532	343924	0.299	350	0.178	0.976	45346	NA	65487	108	667	805	21.3
T1004	Male	White	39	TAMC	Healthy	T14d	Venous serum	NA	1.99049e+06	NA	239777	167464	351026	0.0009	254	0.042	0.773	44857	NA	71372	120	598	708	139
T1004	Male	White	39	TAMC	Healthy	T28d	Tasso SST serum	NA	1.82143e+06	NA	293339	210026	334641	2.07	1808	0.289	0.808	43670	NA	76578	105	925	860	223
T1004	Male	White	39	TAMC	Healthy	T28d	Venous plasma	NA	3.21894e+06	NA	517922	197665	446310	0.28	281	0.198	0.848	57229	NA	86170	111	695	911	23.5
T1004	Male	White	39	TAMC	Healthy	T28d	Venous serum	NA	2.8012e+06	NA	257639	183629	399015	0.0009	371	0.114	0.759	51930	NA	88888	102	774	908	275
T1005	Female	White	49	TAMC	Healthy	T07d	Tasso SST serum	558000	665053	92.9	251837	27021	318945	0.086	1866	0.196	3.24	52827	4220	79980	34.6	912	999	319
T1005	Female	White	49	TAMC	Healthy	T07d	Venous plasma	552762	730127	66.9	235274	13967	314050	0.301	247	0.226	3.66	54223	4219	68414	32.7	851	845	43.3
T1005	Female	White	49	TAMC	Healthy	T07d	Venous serum	532845	710442	72	104460	13813	290789	0.0009	236	0.065	3.68	47369	4128	66308	30.7	925	895	157
T1005	Female	White	49	TAMC	Healthy	T14d	Tasso SST serum	526152	590464	86.1	144010	40317	261705	0.062	4430	0.192	0.895	49330	3784	71543	44.8	820	932	279
T1005	Female	White	49	TAMC	Healthy	T14d	Venous plasma	492285	501979	55.2	218448	10127	260550	0.492	198	0.469	1.06	45048	3657	60362	47.9	999	877	64.1
T1005	Female	White	49	TAMC	Healthy	T14d	Venous serum	545942	622387	64.1	121670	12168	273321	0.0009	242	0.124	0.961	50807	4274	73404	44.4	920	840	147
T1005	Female	White	49	TAMC	Healthy	T28d	Tasso SST serum	570948	537559	109	2.04368e+07	45536	301218	8.8	3413	0.137	193	52470	4439	186411	31.6	917	1280	565
T1005	Female	White	49	TAMC	Healthy	T28d	Venous plasma	593882	811302	56.2	256939	25055	321076	0.248	235	0.142	1.17	61352	4737	77132	31.3	1019	851	34.2
T1005	Female	White	49	TAMC	Healthy	T28d	Venous serum	579823	606081	78.2	145452	24969	322266	0.0009	297	0.058	1.09	56051	4649	73310	30.5	880	867	183
T1006	Female	Asian	45	TAMC	Healthy	T00d	Tasso SST serum	NA	254229	NA	841550	215114	206889	0.498	1103	0.258	3.06	57456	NA	101787	32.2	528	737	390
T1006	Female	Asian	45	TAMC	Healthy	T00d	Venous plasma	NA	244447	NA	294462	165769	219485	0.043	196	0.1	3.06	61231	NA	82255	26.9	386	638	44.5
T1006	Female	Asian	45	TAMC	Healthy	T00d	Venous serum	NA	249754	NA	180655	166314	197540	0.0009	248	0.034	2.94	54004	NA	80246	27.5	340	655	132
T1006	Female	Asian	45	TAMC	Healthy	T03d	Tasso SST serum	NA	284797	NA	121656	150052	174171	0.142	740	0.159	3.41	46939	NA	77820	32.9	494	711	335
T1006	Female	Asian	45	TAMC	Healthy	T03d	Venous plasma	NA	369100	NA	284433	184245	213648	0.0009	236	0.005	3.31	58037	NA	74204	30.2	395	628	81.3
T1006	Female	Asian	45	TAMC	Healthy	T03d	Venous serum	NA	356925	NA	149945	175437	219950	0.0009	326	0.0009	3.42	59875	NA	92604	29.5	455	652	291
T1006	Female	Asian	45	TAMC	Healthy	T07d	Tasso SST serum	NA	232679	NA	210944	178017	180191	0.272	1247	0.118	1.93	49853	NA	78131	30.6	692	760	366
T1006	Female	Asian	45	TAMC	Healthy	T07d	Venous plasma	NA	252069	NA	381376	183943	215670	0.001	192	0.089	1.96	65893	NA	74154	26.6	497	673	45.5
T1006	Female	Asian	45	TAMC	Healthy	T07d	Venous serum	NA	265032	NA	242785	173763	230877	0.0009	238	0.0009	1.74	56593	NA	84826	28.3	487	686	162
T1006	Female	Asian	45	TAMC	Healthy	T14d	Tasso SST serum	NA	246520	NA	82897	177451	200985	0.683	1299	0.19	2.18	57554	NA	76230	30.2	567	729	344
T1006	Female	Asian	45	TAMC	Healthy	T14d	Venous plasma	NA	258030	NA	311713	156533	214649	0.0009	226	0.022	2.11	63285	NA	71848	26.3	487	611	85.4
T1006	Female	Asian	45	TAMC	Healthy	T14d	Venous serum	NA	236525	NA	93733	171480	210235	0.0009	243	0.0009	1.93	59874	NA	78912	26.1	410	721	259
T1006	Female	Asian	45	TAMC	Healthy	T28d	Tasso SST serum	NA	207351	NA	205744	184780	184027	0.132	1035	0.148	2.02	53190	NA	63935	35.9	616	694	361
T1006	Female	Asian	45	TAMC	Healthy	T28d	Venous plasma	NA	269029	NA	374939	167466	187497	0.054	165	0.035	2.01	57579	NA	61570	32.6	510	645	71.8
T1006	Female	Asian	45	TAMC	Healthy	T28d	Venous serum	NA	325443	NA	213314	156469	219092	0.0009	356	0.0009	1.7	61607	NA	88829	25.1	420	532	165
T1007	Female	White	29	TAMC	Healthy	T00d	Tasso SST serum	253478	957289	110	229080	10321	327988	0.0009	1234	0.443	0.67	36497	3918	63562	75	1754	902	51
T1007	Female	White	29	TAMC	Healthy	T00d	Venous plasma	250431	1.04294e+06	101	496102	7498	337827	0.0009	158	0.634	0.868	39988	4206	63010	81.1	1769	945	18.7
T1007	Female	White	29	TAMC	Healthy	T00d	Venous serum	261927	1.09683e+06	104	250982	7931	353119	0.0009	164	0.361	0.764873	37325	4202	67139	76.3	1617	443	23.9
T1007	Female	White	29	TAMC	Healthy	T03d	Tasso SST serum	245001	275038	99.9	6.2464e+06	8879	298638	0.042	2571	0.259	1.33	33144	3414	59235	95	1371	926	62.8
T1007	Female	White	29	TAMC	Healthy	T03d	Venous plasma	291626	365429	76.4	346814	7190	365658	0.054	162	0.43	0.628	44753	3948	68823	106	1678	971	23
T1007	Female	White	29	TAMC	Healthy	T03d	Venous serum	296982	392316	93.4	167698	6871	396041	0.0009	190	0.242	0.68	42354	4059	68143	97.4	1937	992	55.4
T1007	Female	White	29	TAMC	Healthy	T07d	Tasso SST serum	279487	798709	87.8	197349	9497	388347	0.054	810	0.302	0.739	45742	4013	72376	101	1362	886	52.7
T1007	Female	White	29	TAMC	Healthy	T07d	Venous plasma	256890	719265	65.5	239250	6893	351328	0.035	153	0.41	0.715	42565	3807	63806	93.8	1349	816	18.5
T1007	Female	White	29	TAMC	Healthy	T07d	Venous serum	241548	730578	92.1	111986	6585	348994	0.0009	185	0.22	0.683	40214	3526	65884	102	1396	817	46.8
T1007	Female	White	29	TAMC	Healthy	T28d	Tasso SST serum	257407	989625	84.7	145052	8675	332496	0.0009	1227	0.724	1.25	36536	3712	63658	78.8	1032	813	36.8
T1007	Female	White	29	TAMC	Healthy	T28d	Venous plasma	273212	1.04943e+06	76.8	261804	5037	342979	0.913	192	1.26	1.13	42276	3892	69157	79.7	1108	891	27.7
T1007	Female	White	29	TAMC	Healthy	T28d	Venous serum	262198	1.13917e+06	86.2	158335	5769	335240	0.085	257	0.92	1.24	41193	3990	73999	81.1	1073	892	65.5
T1008	Male	Black / African American	28	TAMC	Healthy	T00d	Tasso SST serum	NA	234229	NA	623293	59012	358163	0.0009	902	1.09	0.509	49432	NA	76190	87.4	956	797	128
T1008	Male	Black / African American	28	TAMC	Healthy	T00d	Venous plasma	NA	185169	NA	330999	50872	358211	0.198	154	1.46	0.47	49743	NA	71787	95.7	1070.01	710	33.9
T1008	Male	Black / African American	28	TAMC	Healthy	T00d	Venous serum	NA	251838	NA	176502	50050	303093	0.0009	165	1.19	0.518	48392	NA	78180	88.2	952	817	89.3
T1008	Male	Black / African American	28	TAMC	Healthy	T03d	Tasso SST serum	NA	160633	NA	259226	54644	342856	0.147	2071	1.07	2.34	53059	NA	79275	198	835	1536	149
T1008	Male	Black / African American	28	TAMC	Healthy	T03d	Venous plasma	NA	200693	NA	337236	49683	356745	0.214	808	0.58	2.08	51772	NA	71245	207	879	1011	30.4
T1008	Male	Black / African American	28	TAMC	Healthy	T03d	Venous serum	NA	189009	NA	183429	49195	359361	0.0009	791	0.355	2.02	53930	NA	77088	194	767	1118	96.5
T1008	Male	Black / African American	28	TAMC	Healthy	T07d	Tasso SST serum	NA	157559	NA	149326	41523	288793	0.011	1132	0.226	0.459	39157	NA	64108	92.9	1056	843	138
T1008	Male	Black / African American	28	TAMC	Healthy	T07d	Venous plasma	NA	173480	NA	236235	34021	323797	0.007	118	0.462	0.534	43658	NA	64982	91.6	1112	747	28.2
T1008	Male	Black / African American	28	TAMC	Healthy	T07d	Venous serum	NA	162023	NA	113993	36632	299851	0.0009	146	0.241	0.475	40890	NA	65162	77	1090	686	71.4
T1008	Male	Black / African American	28	TAMC	Healthy	T14d	Tasso SST serum	NA	152736	NA	96364	67697	306944	0.023	1473	0.201	0.664	43020	NA	77182	81.3	1103	851	133
T1008	Male	Black / African American	28	TAMC	Healthy	T14d	Venous plasma	NA	133702	NA	152691	54722	303053	0.109	156	0.459	0.73	44663	NA	66740	80.2	1055	794	20.6
T1008	Male	Black / African American	28	TAMC	Healthy	T14d	Venous serum	NA	152888	NA	102374	63160	317066	0.0009	153	0.207	0.602	45084	NA	72479	88.1	953	800	46.4
T1008	Male	Black / African American	28	TAMC	Healthy	T28d	Tasso SST serum	NA	120470	NA	78188	72569	305722	0.0009	853	0.333	0.581	40662	NA	69459	101	905	748	120
T1008	Male	Black / African American	28	TAMC	Healthy	T28d	Venous plasma	NA	213556	NA	142113	58720	323015	0.155	113	0.576	0.552	47162	NA	66967	112	995	770	22.3
T1008	Male	Black / African American	28	TAMC	Healthy	T28d	Venous serum	NA	167196	NA	102826	67825	381703	0.0009	209	0.386	0.546	50543	NA	86488	102	1039	798	142
T1009	Female	White	25	TAMC	Healthy	T00d	Tasso SST serum	NA	240443	NA	42075	198931	319470	0.071	642	0.217	0.49	42010	NA	58268	28.9	1079	783	36.9
T1009	Female	White	25	TAMC	Healthy	T00d	Venous plasma	NA	297999	NA	75068	188257	329338	0.017	106	0.542	0.514	42857	NA	54920	28.9	1168	712	21.8
T1009	Female	White	25	TAMC	Healthy	T00d	Venous serum	NA	326760	NA	39619	190501	334660	0.0009	142	0.312	0.544	42286	NA	60991	26.8	1116	729	40.9
T1009	Female	White	25	TAMC	Healthy	T03d	Tasso SST serum	NA	254512	NA	51375	173527	303107	0.232	1086	0.072	0.585	39384	NA	59729	23.6	1085	764	47.6
T1009	Female	White	25	TAMC	Healthy	T03d	Venous plasma	NA	272829	NA	97675	184974	329118	0.063	126	0.292	0.726	42270	NA	59322	23.6	1252	710	25.1
T1009	Female	White	25	TAMC	Healthy	T03d	Venous serum	NA	377398	NA	72223	218327	407140	0.0009	259	0.062	0.716	50060	NA	84526	29.2	1295	657	63.4
T1009	Female	White	25	TAMC	Healthy	T07d	Tasso SST serum	NA	638343	NA	145287	209511	327476	0.0009	1277	0.172	0.698	40530	NA	71378	28.1	1219	764	56.8
T1009	Female	White	25	TAMC	Healthy	T07d	Venous plasma	NA	506468	NA	113594	190663	322765	0.254	139	0.474	0.721	44372	NA	68939	25.9	1457	734	19.1
T1009	Female	White	25	TAMC	Healthy	T07d	Venous serum	NA	569980	NA	69280	188807	345602	0.0009	170	0.179	0.795	42203	NA	78787	27.4	1243	730	42
T1009	Female	White	25	TAMC	Healthy	T14d	Tasso SST serum	NA	473075	NA	41397	222957	284553	0.319	757	0.491	0.576	38708	NA	52807	26.3	1148	769	37.9
T1009	Female	White	25	TAMC	Healthy	T14d	Venous plasma	NA	466618	NA	80823	182550	268340	0.095	129	0.56	0.69	40217	NA	50512	26.9	1248	755	18
T1009	Female	White	25	TAMC	Healthy	T14d	Venous serum	NA	462146	NA	52953	214207	338798	0.0009	195	0.428	0.634	42998	NA	61231	27	1212	800	59.6
T1009	Female	White	25	TAMC	Healthy	T28d	Tasso SST serum	NA	140503	NA	46449	198495	290520	0.0009	952	0.028	0.503	37419	NA	59256	26.6	945	740	71
T1009	Female	White	25	TAMC	Healthy	T28d	Venous plasma	NA	166508	NA	79987	220377	310580	0.083	92.2	0.214	0.607	41978	NA	53878	29.5	1038	813	21.1
T1009	Female	White	25	TAMC	Healthy	T28d	Venous serum	NA	180357	NA	42361	218787	315517	0.0009	136	0.053	0.641	40104	NA	55816	27	923	704	21.3
T1010	Male	White	52	TAMC	Healthy	T00d	Tasso SST serum	1.13325e+06	3638869	184	235577	778028	596910	0.0009	2033	0.102	4.58	46769	7704	66426	94.7	1125	1246	120
T1010	Male	White	52	TAMC	Healthy	T00d	Venous plasma	1130724	4.97051e+06	132	555850	1.20628e+06	585764	0.283	699	0.283	4.67	48776	8387	60924	88.3	1130	1137	38.6
T1010	Male	White	52	TAMC	Healthy	T00d	Venous serum	1.1219e+06	4343219	167	266700	635996	544211	0.0009	675	0.142	4.69	40867	6279	57006	94.4	1090	1380	60.4
T1010	Male	White	52	TAMC	Healthy	T07d	Tasso SST serum	1.09158e+06	4.18857e+06	159	244678	546310	496406	0.205	1990	0.318	4.94	39872	7268	64357	101	1047	1290	101
T1010	Male	White	52	TAMC	Healthy	T07d	Venous plasma	1.04343e+06	4.26008e+06	122	542376	433435	511322	0.393	505	0.253	5.15	39479	6886	58341	99.4	838	1110	35.6
T1010	Male	White	52	TAMC	Healthy	T07d	Venous serum	1.16489e+06	4.752e+06	150	230291	661803	578069	1.61	603	0.847	4.69	44255	7155	63655	97.1	1150	1184	145
T1010	Male	White	52	TAMC	Healthy	T14d	Tasso SST serum	1.31203e+06	7.00427e+06	191	265577	1.34305e+06	658621	0.168	3678	0.131	5.63	51026	7708	61544	97.6	1021	1232	117
T1010	Male	White	52	TAMC	Healthy	T14d	Venous plasma	1109511	7.52224e+06	141	671618	1.26626e+06	547822	0.174	838	0.339	5.24	51002	7642	52876	99.4	1011	951	41.8
T1010	Male	White	52	TAMC	Healthy	T14d	Venous serum	1.6668e+06	9.33461e+06	172	384442	815947	696636	0.0009	850	0.142	5.7	55126	8456	73538	95.3	1136	1211	110
T1010	Male	White	52	TAMC	Healthy	T28d	Tasso SST serum	970325	4.48763e+06	170	236355	489039	527552	0.273	1926	0.191	5.98	40492	7005	58413	90.3	944	1306	116
T1010	Male	White	52	TAMC	Healthy	T28d	Venous plasma	931935	5.18869e+06	137	592613	487494	552833	0.326	827	0.452	5.55	46513	7477	58529	86.9	930	1157	48.9
T1010	Male	White	52	TAMC	Healthy	T28d	Venous serum	1.12098e+06	5.87235e+06	158	256406	725365	656102	0.0009	926	0.2	5.27	49533	7465	66062	84.2	1053	1236	116
T1011	Female	White	34	TAMC	Healthy	T00d	Tasso SST serum	501268	984979	65.4	71992	48846	355668	0.0009	1582	0.0009	1.09	47084	4182	64048	60.7	984	1039	185
T1011	Female	White	34	TAMC	Healthy	T00d	Venous plasma	517391	987190	54.3	184546	36518	351720	0.377	265	0.079	1.03	50189	4592	62288	58	992	933	43.3
T1011	Female	White	34	TAMC	Healthy	T00d	Venous serum	518251	985184	64.7	76769	40194	338492	0.0009	256	0.011	0.807	45639	4783	64106	55.9	946	943	140
T1011	Female	White	34	TAMC	Healthy	T03d	Tasso SST serum	445763	577891	71.2	56665	59441	308692	0.081	2584	0.002	0.585	43289	3537	67532	50.7	1070	899	188
T1011	Female	White	34	TAMC	Healthy	T03d	Venous plasma	511815	683550	55.3	142054	37679	327452	0.274	204	0.2	0.642	48423	4022	67952	54	1127	826	30.3
T1011	Female	White	34	TAMC	Healthy	T03d	Venous serum	469371	587332	62.7	82153	39095	336983	0.0009	209	0.0009	0.662	45620	4324	63771	53.9	1136	923	99.6
T1011	Female	White	34	TAMC	Healthy	T07d	Tasso SST serum	432023	773592	179	214432	37990	301090	0.016	1907	0.0009	0.99	46355	4032	70478	60.8	952	982	199
T1011	Female	White	34	TAMC	Healthy	T07d	Venous plasma	499454	990344	172	410394	37326	384998	0.025	270	0.114	1.15	53694	4581	78740	63	1137	1000	45.3
T1011	Female	White	34	TAMC	Healthy	T07d	Venous serum	460739	955061	187	184123	33772	327160	0.0009	345	0.004	1.21	44496	3799	74757	63.7	1119	1050	231
T1011	Female	White	34	TAMC	Healthy	T14d	Tasso SST serum	430466	591573	65.4	111864	65670	305397	0.0009	738	0.0009	0.87	39903	3886	70507	50	890	814	157
T1011	Female	White	34	TAMC	Healthy	T14d	Venous plasma	492635	616811	48.5	238818	47611	330545	0.002	226	0.133	0.786	49459	4049	57510	55.7	974	940	31.5
T1011	Female	White	34	TAMC	Healthy	T14d	Venous serum	487516	663509	70.1	118407	53727	307266	0.0009	410	0.0009	0.806	46582	4376	64146	56	915	1027	203
T1011	Female	White	34	TAMC	Healthy	T28d	Tasso SST serum	413402	562242	62.4	89272	66352	296262	0.0009	1012	0.0009	0.82	45188	3672	56479	77.1	778	1016	134
T1011	Female	White	34	TAMC	Healthy	T28d	Venous plasma	485973	510766	51.3	216047	29856	333357	0.154	295	0.166	0.9	54807	3773	61972	70.6	894	1020	30.4
T1011	Female	White	34	TAMC	Healthy	T28d	Venous serum	468520	649356	61.5	112612	31802	328085	0.0009	406	0.0009	0.839	45454	3998	64863	69.3	1085	1080	192
T1012	Female	Asian	57	TAMC	Healthy	T00d	Tasso SST serum	681983	693250	202	125046	252753	321288	2.24	3276	0.0009	2.01	47829	3703	69754	215	503	1004	245
T1012	Female	Asian	57	TAMC	Healthy	T00d	Venous plasma	719742	819237	177	194427	231717	349368	0.132	356	0.522	1.79	52580	3679	66098	201	763	795	39.8
T1012	Female	Asian	57	TAMC	Healthy	T00d	Venous serum	715969	788818	195	91346	235617	334313	0.0009	411	0.127	1.81	47588	3947	67515	199	694	793	145
T1012	Female	Asian	57	TAMC	Healthy	T03d	Tasso SST serum	650375	877551	216	103145	242804	349625	0.505	1570	0.383	1.81	52225	3988	65052	195	829	889	154
T1012	Female	Asian	57	TAMC	Healthy	T03d	Venous plasma	627414	919429	189	216187	208130	349064	3.35	333	0.439	1.39	54823	3584	65630	193	866	844	38.6
T1012	Female	Asian	57	TAMC	Healthy	T03d	Venous serum	622790	814802	212	103369	207561	336644	0.0009	374	0.322	1.24	51280	3999	66652	183	824	718	95.4
T1012	Female	Asian	57	TAMC	Healthy	T07d	Tasso SST serum	586735	1.15829e+06	173	79811	199090	321590	1.04	1901	0.24	2.03	48063	3778	63125	199	704	938	237
T1012	Female	Asian	57	TAMC	Healthy	T07d	Venous plasma	764669	1.23569e+06	172	235234	256912	384522	0.0009	383	0.534	2.05	69164	5083	77978	177	817	881	33.6
T1012	Female	Asian	57	TAMC	Healthy	T07d	Venous serum	567683	1.02991e+06	168	93546	215852	308830	0.0009	387	0.298	2.12	48011	4017	68705	194	875	974	129
T1012	Female	Asian	57	TAMC	Healthy	T14d	Tasso SST serum	688574	700501	189	150322	283842	353539	1.54	3160	0.317	1.53	50719	5184	67506	190	610	935	321
T1012	Female	Asian	57	TAMC	Healthy	T14d	Venous plasma	641501	732165	191	225066	197102	354238	0.053	332	0.478	1.75	54475	4714	70850	174	672	800	40.7
T1012	Female	Asian	57	TAMC	Healthy	T14d	Venous serum	658009	747227	193	104621	215471	371041	0.0009	380	0.302	1.52	55845	4721	70894	184	712	854	314
T1012	Female	Asian	57	TAMC	Healthy	T28d	Tasso SST serum	434015	773808	129	67566	214822	242508	1.09	1252	0.215	1.68	40319	3682	55392	161	584	768	197
T1012	Female	Asian	57	TAMC	Healthy	T28d	Venous plasma	533961	1.02435e+06	163	207738	219537	353514	0.444	267	0.396	1.82	53833	4095	60124	183	730	859	36.6
T1012	Female	Asian	57	TAMC	Healthy	T28d	Venous serum	802948	1.37846e+06	168	147866	209978	442732	0.0009	348	0.181	1.89	66267	4257	83355	175	691	856	276
T1014	Female	White	27	TAMC	Healthy	T00d	Tasso SST serum	578781	1.23015e+06	92.2	85928	107752	281073	0.0009	2104	0.021	1.72	59741	3229	98053	32.5	361	576	187
T1014	Female	White	27	TAMC	Healthy	T00d	Venous plasma	447345	1.02602e+06	55.2	156196	80600	227281	0.0009	239	0.168	1.46	49980	2842	66759	28.5	359	503	25.9
T1014	Female	White	27	TAMC	Healthy	T00d	Venous serum	468182	1.11131e+06	78.8	73837	85957	247215	0.0009	330	0.03	1.39	50047	2960	76690	28.8	379	595	199
T1014	Female	White	27	TAMC	Healthy	T03d	Tasso SST serum	492824	590886	80.7	141555	116167	246065	0.0009	1106	0.0009	2.33	49530	2868	88194	28.9	317	711	244
T1014	Female	White	27	TAMC	Healthy	T03d	Venous plasma	524134	660066	60.2	162123	100816	262670	0.0009	269	0.07	2.89	55838	2707	77292	26.6	401	566	25.9
T1014	Female	White	27	TAMC	Healthy	T03d	Venous serum	495137	846398	65.3	85588	107657	254990	0.0009	391	0.051	2.81	52338	2928	88280	25.3	348	577	117
T1014	Female	White	27	TAMC	Healthy	T07d	Tasso SST serum	494126	789713	111	128911	105208	239249	0.0009	942	0.086	2.08	51465	2924	87008	31.8	414	796	227
T1014	Female	White	27	TAMC	Healthy	T07d	Venous plasma	522835	1066004	71.2	207992	106064	253121	0.0009	283	0.19	1.68	59195	3110	83195	27.7	389	492	25.5
T1014	Female	White	27	TAMC	Healthy	T07d	Venous serum	550077	751949	82.5	83770	103322	283071	0.0009	479	0.08	1.81	53051	3183	103794	25.4	363	631	181
T1014	Female	White	27	TAMC	Healthy	T14d	Tasso SST serum	515491	1.45172e+06	107	169850	101414	243472	0.0009	932	0.091	1.94	52133	2553	97177	30.9	311	754	248
T1014	Female	White	27	TAMC	Healthy	T14d	Venous plasma	484790	1.03533e+06	71.7	290459	98261	246286	0.0009	286	0.118	1.87	53102	2787	77541	28	252	608	21.9
T1014	Female	White	27	TAMC	Healthy	T14d	Venous serum	486537	1.31666e+06	81.7	149868	100521	253265	0.0009	398	0.092	1.84	51751	2649	87180	28.2	303	651	158
T1014	Female	White	27	TAMC	Healthy	T28d	Tasso SST serum	405463	816955	65.4	152910	104096	246174	0.095	1300	0.026	2.25	48153	2526	75761	30.3	293	691	171
T1014	Female	White	27	TAMC	Healthy	T28d	Venous plasma	539201	1.00439e+06	56.8	324348	100179	294736	0.0009	356	0.052	2.1	63782	2817	87880	27.7	370	644	34.1
T1014	Female	White	27	TAMC	Healthy	T28d	Venous serum	450123	894101	69.8	214032	95224	257545	0.0009	432	0.047	1.92	50656	2745	98009	24.9	349	653	279
T1015	Male	White	35	TAMC	Healthy	T00d	Tasso SST serum	436685	7.57215e+06	106	181888	139336	241168	0.0009	2126	0.042	3.26	38380	3328	121254	73.6	249	797	116
T1015	Male	White	35	TAMC	Healthy	T00d	Venous plasma	526178	8.70084e+06	55.2	335224	111460	275923	0.124	174	0.338	3.36	45930	3520	67425	74.3	488	836	23.7
T1015	Male	White	35	TAMC	Healthy	T00d	Venous serum	597584	1.28984e+07	69.2	207505	137645	289561	0.0009	229	0.108	3.37	49696	3362	79490	72	473	779	67.7
T1015	Male	White	35	TAMC	Healthy	T03d	Tasso SST serum	501729	9.25745e+06	102	411250	164418	241177	0.014	2515	0.274	1.42	40760	3162	85630	349	599	857	185
T1015	Male	White	35	TAMC	Healthy	T03d	Venous plasma	547467	1.10035e+07	58.4	589675	135468	285522	0.003	220	0.448	1.38	46185	3260	76113	351	590	744	27.4
T1015	Male	White	35	TAMC	Healthy	T03d	Venous serum	586686	7.74618e+06	113	368811	156647	329401	0.0009	362	0.315	1.4	55080	4544	99193	359	623	867	223
T1015	Male	White	35	TAMC	Healthy	T07d	Tasso SST serum	539035	2.64773e+06	87.9	499132	100725	270481	0.0009	1215	0.194	1.57	44905	3653	73722	81.5	490	795	160
T1015	Male	White	35	TAMC	Healthy	T07d	Venous plasma	382907	1.73691e+06	53.9	173030	71307	193870	0.332	141	0.249	2.68	35484	2460	47827	76.2	519	726	24.7
T1015	Male	White	35	TAMC	Healthy	T14d	Tasso SST serum	477636	1.72889e+06	93.4	63530	69404	243329	0.0009	873	0.0009	1.18	41614	3006	58007	75.9	451	753	114
T1015	Male	White	35	TAMC	Healthy	T14d	Venous plasma	498105	1.63171e+06	61.9	146163	73610	253183	0.0009	172	0.225	1.27	44360	3301	60160	75.7	471	750	24
T1015	Male	White	35	TAMC	Healthy	T14d	Venous serum	596174	2.10642e+06	104	80108	73891	272035	0.0009	210	0.052	1.36	49803	3589	73020	75.9	624	796	187
T1015	Male	White	35	TAMC	Healthy	T28d	Tasso SST serum	380494	2322625	78.8	1.57476e+06	99034	224067	0.0009	1044	0.062	1.16	41028	2637	84699	88.6	715	837	175
T1016	Male	White	34	TAMC	Healthy	T00d	Tasso SST serum	710541	309834	79.4	219275	158788	243215	0.0009	303	0.023	0.719	43112	3549	64234	34	838	645	91.3
T1016	Male	White	34	TAMC	Healthy	T00d	Venous plasma	773554	396824	93.3	215938	175579	297710	0.048	150	0.159	0.911	48731	3895	66448	40.1	990	662	20.1
T1016	Male	White	34	TAMC	Healthy	T00d	Venous serum	746398	404642	103	115189	158579	301238	0.0009	210	0.0009	0.935	45153	3750	69037	36.9	1022	701	106
T1016	Male	White	34	TAMC	Healthy	T03d	Tasso SST serum	649064	147516	103	148158	169384	289279	0.0009	1186	0.316	1.09	40685	3828	64070	30.9	1242	685	81.4
T1016	Male	White	34	TAMC	Healthy	T03d	Venous plasma	945067	173914	68.8	219419	189264	349963	0.0009	188	0.448	0.799	52665	4437	68211	27.3	1223	629	21.6
T1016	Male	White	34	TAMC	Healthy	T03d	Venous serum	854075	169980	104	94120	168028	303400	0.0009	180	0.316	0.957	47067	3703	68783	33.3	1156	738	88.8
T1016	Male	White	34	TAMC	Healthy	T07d	Tasso SST serum	818314	353981	167	275677	168541	297241	0.0009	1234	0.14	0.874	45095	3931	79490	39.8	1178	817	104
T1016	Male	White	34	TAMC	Healthy	T07d	Venous plasma	861453	373075	141	243242	188601	291681	0.202	166	0.44	1.03	53779	4316	70896	38.3	1349	849	24.3
T1016	Male	White	34	TAMC	Healthy	T07d	Venous serum	754803	378135	164	115853	179945	332174	0.0009	248	0.202	0.972	48445	4323	78699	35.2	1286	864	111
T1016	Male	White	34	TAMC	Healthy	T14d	Tasso SST serum	964652	191029	110	4.06029e+06	191059	305939	0.0009	1122	0.084	1.21	45459	4369	59800	40.5	792	823	90
T1016	Male	White	34	TAMC	Healthy	T14d	Venous plasma	791100	156720	62	195406	153035	291169	0.04	154	0.233	0.7	46075	4155	59161	34.9	1010	632	25.2
T1016	Male	White	34	TAMC	Healthy	T14d	Venous serum	880953	160206	80.8	108799	159178	290495	0.0009	217	0.129	0.739	48177	4464	66864	38	922	686	73.4
T1016	Male	White	34	TAMC	Healthy	T28d	Tasso SST serum	698275	347235	88.5	121693	170381	263062	0.0009	924	0.0009	0.947	44546	3784	56852	42.6	1050	732	75.5
T1016	Male	White	34	TAMC	Healthy	T28d	Venous plasma	746062	323795	70.1	261490	188274	295442	0.0009	170	0.186	0.884	48041	4759	59030	42.5	1092	611	23.9
T1016	Male	White	34	TAMC	Healthy	T28d	Venous serum	851841	396956	63.5	109580	171769	326716	0.0009	193	0.012	0.743	50265	4073	63002	31.6	1035	565	56.4
T1017	Female	American Indian / Alaska Native	59	TAMC	Healthy	T03d	Tasso SST serum	424074	601226	163	2359350	15581	228299	0.308	1404	0.0009	2.38	27592	4063	61126	105	1075	1036	182
T1017	Female	American Indian / Alaska Native	59	TAMC	Healthy	T03d	Venous plasma	503277	589983	138	409612	7872	276569	0.0009	452	0.141	2.49	27588	4084	73151	106	1053	1055	46.3
T1017	Female	American Indian / Alaska Native	59	TAMC	Healthy	T03d	Venous serum	422292	577555	152	201694	7093	240894	0.0009	220	0.0009	2.23	25388	4143	66728	102	1120	1012	159
T1017	Female	American Indian / Alaska Native	59	TAMC	Healthy	T07d	Tasso SST serum	492029	1.77683e+06	214	1.17834e+07	20680	232671	0.98	2042	0.0009	3.74	28055	3740	71362	139	880	1135	232
T1017	Female	American Indian / Alaska Native	59	TAMC	Healthy	T07d	Venous plasma	493563	2.0082e+06	167	401831	9845	254876	0.024	225	0.091	3.81	27194	4699	67769	132	1024	1011	53.4
T1017	Female	American Indian / Alaska Native	59	TAMC	Healthy	T07d	Venous serum	531812	2.02728e+06	190	194757	10471	273751	0.0009	335	0.003	3.43	28994	4224	79472	131	945	1021	178
T1017	Female	American Indian / Alaska Native	59	TAMC	Healthy	T14d	Tasso SST serum	430273	743771	174	429703	59072	226562	14.1	6471	0.0009	3.52	25341	3697	80194	138	837	969	254
T1017	Female	American Indian / Alaska Native	59	TAMC	Healthy	T14d	Venous plasma	500489	1.10761e+06	134	472812	7029	278878	0.015	184	0.05	2.02	35933	3833	77191	146	1034	954	59.1
T1017	Female	American Indian / Alaska Native	59	TAMC	Healthy	T14d	Venous serum	457975	865889	145	192702	8189	267961	0.0009	214	0.0009	2.03	29376	4159	77652	140	999	907	142
T1017	Female	American Indian / Alaska Native	59	TAMC	Healthy	T28d	Tasso SST serum	462613	847898	194	4.63088e+08	17911	233161	0.055	1565	0.0009	2.78	27907	4501	73850	188	921	968	245
T1017	Female	American Indian / Alaska Native	59	TAMC	Healthy	T28d	Venous plasma	416666	946476	178	400388	7291	277584	0.001	214	0.0009	2.03	29562	4544	65730	176	1032	849	96.9
T1018	Female	White	28	TAMC	Healthy	T00d	Tasso SST serum	219414	399858	61.2	572369	60374	216302	2.61	1318	1.41	1.1	34810	3376	58554	30.2	815	783	67.3
T1018	Female	White	28	TAMC	Healthy	T00d	Venous plasma	262631	438167	46.6	313919	59840	250330	0.224	149	2.03	1.37	42159	3713	63130	29.2	885	682	19
T1018	Female	White	28	TAMC	Healthy	T00d	Venous serum	252642	394845	63.6	236350	60768	244669	0.067	238	1.81	1.31	40627	3932	67215	27.8	934	698	62.5
T1018	Female	White	28	TAMC	Healthy	T03d	Tasso SST serum	344034	429541	38.2	468998	69590	278710	1.1	901	0.884	0.972	43008	4005	76903	33.2	771	789	84.7
T1018	Female	White	28	TAMC	Healthy	T03d	Venous plasma	319690	434012	36.7	293228	55135	286617	0.047	115	1.05	0.981	43528	3799	66304	30	678	710	20.8
T1018	Female	White	28	TAMC	Healthy	T03d	Venous serum	344915	401412	55.1	201189	59184	270072	0.0009	359	1.2	0.977	40540	3960	87146	31.3	776	820	103
T1018	Female	White	28	TAMC	Healthy	T07d	Tasso SST serum	387340	566314	58.2	1.1218e+06	60394	292100	3.45	1883	1.56	1.06	41613	4170	78663	37	825	846	82.8
T1018	Female	White	28	TAMC	Healthy	T07d	Venous plasma	362164	553560	49.5	395695	45800	270333	0.049	147	1.72	1.05	43040	3941	69653	37.5	751	740	22.6
T1018	Female	White	28	TAMC	Healthy	T07d	Venous serum	368613	511154	58	838338	47483	296217	0.0009	220	1.31	1.01	43126	4164	80314	35.5	932	844	105
T1018	Female	White	28	TAMC	Healthy	T14d	Tasso SST serum	366857	239671	45.2	1.47518e+06	93175	259934	0.443279	3969	0.467825	1.03	40699	4387	82548	34.5	1002.63	809	127.869
T1018	Female	White	28	TAMC	Healthy	T14d	Venous plasma	319589	225611	37.3	464153	52308	264861	0.066	120	1.31	1.11	42420	3385	74243	32.4	774	792	19.2
T1018	Female	White	28	TAMC	Healthy	T14d	Venous serum	386534	231920	48.1	318267	57149	291884	0.0009	191	1.51	1.17	40935	3924	77637	31.3	856	816	52.8
T1018	Female	White	28	TAMC	Healthy	T28d	Tasso SST serum	331215	680453	99.7	478708	66945	280669	2.87	2080	0.976	0.837	45892	3831	90704	37.5	1119	945	88
T1018	Female	White	28	TAMC	Healthy	T28d	Venous plasma	296914	642484	39.3	331227	44154	261089	0.015	122	1.34	0.698	42860	3664	74102	30.3	1144	810	23.6
T1018	Female	White	28	TAMC	Healthy	T28d	Venous serum	311162	619463	49.3	186117	47933	269026	0.0009	126	1.32	0.795	42567	3810	72787	33.3	1105	851	29.3
T1019	Female	White	28	TAMC	Healthy	T03d	Tasso SST serum	350785	1.86434e+06	157	272052	88249	234304	0.063	941	0.318	2.01	53256	4719	83655	63.4	901	759	60.5
T1019	Female	White	28	TAMC	Healthy	T03d	Venous serum	316036	1.73206e+06	154	218649	60373	226545	0.0009	206	0.304	1.72	48424	4500	74178	64.2	994	761	53.9
T1019	Female	White	28	TAMC	Healthy	T28d	Tasso SST serum	325977	1.749e+06	90.9	1.24509e+06	82999	245115	2.23	2397	0.105	1.2	50446	4329	110882	50.2	1393	869	72.4
T1019	Female	White	28	TAMC	Healthy	T28d	Venous plasma	303981	1.70456e+06	74.4	336897	55350	246401	0.492	176	0.328	1.28	54289	4597	91734	39	1449	634	23.3
T1019	Female	White	28	TAMC	Healthy	T28d	Venous serum	309228	1.8239e+06	100	183240	48776	228712	0.02	201	0.208	1.26	50298	4479	94221	48.2	1264	443	53.6
T1020	Female	White	20	TAMC	Healthy	T00d	Tasso SST serum	301773	269087	88.4	75638	16696	263529	0.0009	588	0.037	0.834	29549	4059	75354	64	1173	1049	27.5
T1020	Female	White	20	TAMC	Healthy	T00d	Venous plasma	299658	319012	59.2	191642	14630	271599	0.508	227	0.282	1.06	33815	4380	76340	60.3	1060	928	20.9
T1020	Female	White	20	TAMC	Healthy	T00d	Venous serum	316918	360917	89.1	74749	13955	306550	0.0009	269	0.184	0.98	35008	4172	81104	57	1124	994	27
T1020	Female	White	20	TAMC	Healthy	T03d	Tasso SST serum	301739	259218	85.1	75884	18878	276864	0.14	973	0.204	0.754	31596	4079	78765	52.5	958	894	40
T1020	Female	White	20	TAMC	Healthy	T03d	Venous plasma	343490	307885	47.8	208664	14266	302605	0.423	219	0.631	0.923	38683	3856	85833	56.5	856	955	18.3
T1020	Female	White	20	TAMC	Healthy	T03d	Venous serum	320275	316683	68.4	81005	13640	294589	0.0009	233	0.23	1.04	33693	3977	60640	56.3	1084	978	23.4
T1020	Female	White	20	TAMC	Healthy	T07d	Tasso SST serum	341372	1.18168e+06	78.9	130688	18416	262017	0.0009	789	0.312	0.856	32673	4237	84390	67	1086	1060	33.6
T1020	Female	White	20	TAMC	Healthy	T07d	Venous plasma	325900	1.33124e+06	57.6	279684	17304	288682	0.233	220	0.455	0.799	39989	4063	91686	65.9	1274	958	17.7
T1020	Female	White	20	TAMC	Healthy	T07d	Venous serum	352850	1.27314e+06	104	105743	15868	293912	0.0009	360	0.333	0.849	32359	3767	94592	61.8	1252	957	38.3
T1020	Female	White	20	TAMC	Healthy	T14d	Tasso SST serum	320936	542815	61.1	97128	13161	281852	0.0009	769	0.0009	0.614	28411	3449	74399	61.3	702	1092	39.4
T1020	Female	White	20	TAMC	Healthy	T14d	Venous plasma	322010	526975	37.3	209362	9663	234626	0.236	206	0.34	0.564	32201	3559	68972	57.5	1075	923	24.3
T1020	Female	White	20	TAMC	Healthy	T14d	Venous serum	321191	525381	51.4	111238	10348	279864	0.43	203	0.047	0.695	31239	3431	69097	57.6	1015	927	28.6
T1020	Female	White	20	TAMC	Healthy	T28d	Tasso SST serum	382788	925664	86	76848	29040	310534	0.281	2879	0.117	0.565	37976	4091	93148	68.2	912	1329	36.6
T1020	Female	White	20	TAMC	Healthy	T28d	Venous plasma	351628	818223	38.5	177964	12571	264405	0.122	164	0.241	0.759	37557	3946	89991	50.4	1098	947	20.7
T1020	Female	White	20	TAMC	Healthy	T28d	Venous serum	295297	784280	78.1	50957	11420	252384	0.0009	185	0.123	0.068	28961	3520	78703	49.2	1036	1026	31.1
T1021	Female	White	32	TAMC	Healthy	T00d	Tasso SST serum	358047	268632	106	74113	92715	217831	0.286	1574	0.026	0.814	38278	2960	60364	69.1	788	755	186
T1021	Female	White	32	TAMC	Healthy	T00d	Venous plasma	317807	252092	88.2	142385	83461	252941	0.046	112	0.066	0.815	39770	2889	53810	64.7	770	741	27.4
T1021	Female	White	32	TAMC	Healthy	T00d	Venous serum	353916	271601	117	85499	100401	267742	0.0009	162	0.0009	0.919	41544	3266	61894	69.3	775	792	90.4
T1021	Female	White	32	TAMC	Healthy	T03d	Tasso SST serum	306550	153352	124	85820	123095	267506	0.0009	971	0.0009	0.871	40756	3301	63749	65.6	715	730	193
T1021	Female	White	32	TAMC	Healthy	T03d	Venous plasma	281084	173661	92.1	139417	99780	241866	0.289	111	0.141	0.905	31892	3249	59003	62.9	742	664	42.5
T1021	Female	White	32	TAMC	Healthy	T03d	Venous serum	294053	172272	121	79798	93528	269609	0.0009	220	0.0009	0.817	38214	3347	74099	61.6	715	771	267
T1021	Female	White	32	TAMC	Healthy	T07d	Tasso SST serum	352204	462766	119	113128	112599	282465	0.0009	1538	0.0009	0.707	41872	3156	68201	68	499	760	211
T1021	Female	White	32	TAMC	Healthy	T07d	Venous plasma	307719	424780	95	133712	84873	247881	0.0009	94.6	0.0009	1.68	39112	3204	55970	65.6	664	661	34
T1021	Female	White	32	TAMC	Healthy	T07d	Venous serum	309345	424210	111	75271	94162	243462	0.0009	225	0.0009	2.31	37477	3262	67760	62.5	634	702	174
T1021	Female	White	32	TAMC	Healthy	T14d	Tasso SST serum	308625	207893	95.8	300642	97250	243648	0.0009	2820	0.0009	0.744	40754	3392	69033	60.9	506	762	245
T1021	Female	White	32	TAMC	Healthy	T14d	Venous plasma	286842	216430	89.9	190910	67880	226649	0.088	122	0.095	0.753	39486	3104	54709	59.2	521	621	28.6
T1021	Female	White	32	TAMC	Healthy	T14d	Venous serum	267622	237470	119	92038	65276	220091	0.0009	212	0.0009	0.629	33992	3226	58227	62.2	601	677	184
T1021	Female	White	32	TAMC	Healthy	T28d	Tasso SST serum	313813	264818	111	77610	128869	243319	0.0009	1624	0.0009	0.895	37325	3266	59513	66.9	852	777	213
T1021	Female	White	32	TAMC	Healthy	T28d	Venous plasma	296488	248603	88.8	132978	68069	259524	0.0009	121	0.076	0.922	40518	3408	54305	64	885	629	29.8
T1021	Female	White	32	TAMC	Healthy	T28d	Venous serum	279494	231623	92.7	66623	67211	236190	0.0009	152	0.001	0.867	35823	3060	52956	68.1	995	712	86.1
T1022	Male	White	30	TAMC	Healthy	T00d	Tasso SST serum	699624	1.60221e+06	121	96928	119638	394009	0.365	7682	0.164	1.51	52497	4741	80571	94.8	1420	998	263
T1022	Male	White	30	TAMC	Healthy	T00d	Venous plasma	577029	1.55522e+06	98.1	124679	74386	363477	0.088	327	0.336	1.67	50413	4218	50715	112	1488	873	24
T1022	Male	White	30	TAMC	Healthy	T00d	Venous serum	635167	1.66198e+06	120	94503	89516	370676	0.0009	248	0.189	1.58	51840	5210	63172	111	1587	964	239
T1022	Male	White	30	TAMC	Healthy	T03d	Tasso SST serum	556164	624742	126	69227	123026	342066	0.0009	1652	0.335	1.02	48825	4782	66487	88.6	1701	888	308
T1022	Male	White	30	TAMC	Healthy	T03d	Venous plasma	530766	572971	85.9	121417	78543	332424	0.034	142	0.537	1.09	51653	4629	58579	82.5	1821	715	35.1
T1022	Male	White	30	TAMC	Healthy	T03d	Venous serum	547399	722391	101	57370	75762	360298	0.0009	273	0.281	0.922	51327	4461	64163	80.4	1779	752	289
T1022	Male	White	30	TAMC	Healthy	T07d	Tasso SST serum	628187	1.03908e+06	99.3	77635	119660	389524	0.0009	1263	0.036	1.84	52960	4666	76289	114	1179	1030	318
T1022	Male	White	30	TAMC	Healthy	T07d	Venous plasma	597406	930281	70.7	150181	88621	361610	0.0009	234	0.003	2.27	54933	4290	61400	107	1188	998	20.9
T1022	Male	White	30	TAMC	Healthy	T07d	Venous serum	573701	845934	78.2	86462	92086	352818	0.0009	247	0.004	2.42	52086	4698	61343	109	1188	1102	172
T1022	Male	White	30	TAMC	Healthy	T14d	Tasso SST serum	577938	1.51328e+06	108	88558	92830	337123	0.0009	2217	0.212	0.972	50834	4590	64205	131	1475	1093	315
T1022	Male	White	30	TAMC	Healthy	T14d	Venous plasma	547584	1.40549e+06	82.9	118971	73937	331357	0.06	172	0.549	1.01	49905	4701	55311	142	1632	824	29.8
T1022	Male	White	30	TAMC	Healthy	T14d	Venous serum	533259	1467239	90.5	85593	74010	349391	0.0009	195	0.139	0.939	46393	4615	56328	125	1445	1015	163
T1022	Male	White	30	TAMC	Healthy	T28d	Tasso SST serum	603499	756665	117	57153	130277	347730	0.0009	3387	0.036	1.12	49679	4523	66423	90.7	1355	879	253
T1022	Male	White	30	TAMC	Healthy	T28d	Venous plasma	1.19644e+06	1.4315e+06	86.2	237137	117415	635389	0.017	282	0.075	1.15	88694	7355	100668	81.1	1563	794	23.9
T1022	Male	White	30	TAMC	Healthy	T28d	Venous serum	1256458	1.29826e+06	105	122272	135360	622283	0.0009	281	0.0009	1.03	83216	7242	97061	92.4	1612	872	103
T1023	Male	White	32	TAMC	Healthy	T00d	Tasso SST serum	480317	521834	84.1	163867	64780	283281	0.629	1132	0.0009	0.637	55792	4387	92105	43.1	716	863	57.3
T1023	Male	White	32	TAMC	Healthy	T00d	Venous plasma	419149	483425	48.3	71733	47581	247807	0.253	128	0.065	0.572	50375	3993	72234	42	726	667	19.9
T1023	Male	White	32	TAMC	Healthy	T00d	Venous serum	464547	494643	66.5	31315	48966	270164	0.0009	191	0.032	0.334	50277	4381	83025	39.3	919	751	34.8
T1023	Male	White	32	TAMC	Healthy	T03d	Tasso SST serum	485556	420310	84	60243	63953	238871	4.87	2321	0.12	1.29	46857	4276	95437	50.6	890	986	68.4
T1023	Male	White	32	TAMC	Healthy	T03d	Venous plasma	354107	321030	45.6	58634	35707	185729	0.265	140	0.329	1.37	38664	3417	57911	48.2	857	841	18.5
T1023	Male	White	32	TAMC	Healthy	T03d	Venous serum	465837	429864	63.8	34836	47632	245802	0.0009	211	0.016	1.48	48395	4526	82191	49.6	936	944	42.6
T1023	Male	White	32	TAMC	Healthy	T07d	Tasso SST serum	497663	389612	54.1	132035	55079	258369	2.63	1766	0.0009	0.659	49891	4419	105763	45.9	794	1001	77
T1023	Male	White	32	TAMC	Healthy	T07d	Venous plasma	367222	351845	46.9	51082	36788	218830	0.056	123	0.133	0.59	43532	3377	64985	43.6	974	823	22.8
T1023	Male	White	32	TAMC	Healthy	T07d	Venous serum	593145	418974	77.6	67356	47152	295587	0.0009	330	0.05	0.492	60135	4458	135031	43.2	1056	989	80
T1023	Male	White	32	TAMC	Healthy	T14d	Tasso SST serum	400941	1.7757e+06	104	113095	101364	248882	0.584	1343	0.023	1.03	48648	4394	97369	66.2	880	1030	79.3
T1023	Male	White	32	TAMC	Healthy	T14d	Venous plasma	371379	1.63205e+06	63.9	67530	41837	223802	0.02	153	0.209	0.991	46566	3935	73104	66.2	975	792	26.9
T1023	Male	White	32	TAMC	Healthy	T14d	Venous serum	401220	1.56648e+06	86.8	52459	47610	229123	0.0009	158	0.065	1.04	49345	4004	73052	65.5	905	877	38.8
T1023	Male	White	32	TAMC	Healthy	T28d	Tasso SST serum	470762	2.94321e+06	123	809674	82211	266740	2.01	5538	0.031	1.69	55876	4034	135920	48.1	760	1091	85.6
T1023	Male	White	32	TAMC	Healthy	T28d	Venous plasma	411228	2379291	81.1	87015	51571	243331	0.224	141	0.088	1.28	53193	4071	81809	45.1	894	739	19.2
T1023	Male	White	32	TAMC	Healthy	T28d	Venous serum	468604	2.77582e+06	91.2	45282	53972	291732	0.0009	203	0.0009	1.27	54190	4506	95451	46	923	982	31.1
T1024	Male	American Indian / Alaska Native	23	TAMC	Healthy	T00d	Tasso SST serum	565918	1.34063e+06	102	3.67252e+06	199227	255019	0.0009	2569	0.082	2.74	62542	4229	182993	40.8	878	1048	209
T1024	Male	American Indian / Alaska Native	23	TAMC	Healthy	T03d	Tasso SST serum	638942	1.41103e+06	94.5	1.3386e+06	263651	256189	0.0009	3879	0.0009	3.82	61670	4399	174777	74.3	286	1342	93.2
T1024	Male	American Indian / Alaska Native	23	TAMC	Healthy	T03d	Venous plasma	637885	1.53308e+06	59.9	1.22199e+06	235081	271485	0.0009	538	0.236	3.81	66627	4680	87324	64.3	842	1127	39.8
T1024	Male	American Indian / Alaska Native	23	TAMC	Healthy	T03d	Venous serum	624072	1.57657e+06	72.8	707220	216532	256359	0.0009	520	0.059	4.04	62565	4502	87921	63.3	949	1116	106
T1024	Male	American Indian / Alaska Native	23	TAMC	Healthy	T07d	Tasso SST serum	543345	3.39827e+06	135	511327	287393	241174	0.0009	1632	0.049	2.61	59725	4001	88617	51	884	1072	148
T1024	Male	American Indian / Alaska Native	23	TAMC	Healthy	T07d	Venous plasma	495246	3.0478e+06	87.8	582208	275514	248854	0.0009	332	0.165	2.46	59279	3933	84705	40.8	971	830	28.8
T1024	Male	American Indian / Alaska Native	23	TAMC	Healthy	T07d	Venous serum	515880	2.86088e+06	94.9	310370	250533	250221	0.0009	365	0.111	2.38	52345	4318	84124	38.7	901	972	87.7
T1024	Male	American Indian / Alaska Native	23	TAMC	Healthy	T14d	Tasso SST serum	496048	3.70166e+06	95	422545	271954	246049	0.0009	1552	0.008	3.14	60968	4055	94691	46.3	880	1182	165
T1024	Male	American Indian / Alaska Native	23	TAMC	Healthy	T14d	Venous plasma	449449	3.29159e+06	59.4	684205	212283	223211	0.0009	435	0.195	2.99	56998	3905	77944	40	863	1033	34.8
T1024	Male	American Indian / Alaska Native	23	TAMC	Healthy	T14d	Venous serum	454291	3.95308e+06	72.1	364758	239079	217282	0.0009	412	0.032	2.93	57922	3948	78506	38.1	905	911	74.8
T1025	NA	NA	NA	TAMC	Healthy	T00d	Tasso SST serum	307107	1.43324e+06	58.7	1.23063e+06	107480	271414	2.5	965	0.191	1.6	42076	6127	96901	61.4	1188	1244	147
T1025	NA	NA	NA	TAMC	Healthy	T00d	Venous plasma	279075	1.37245e+06	51.4	205782	89042	255809	0.13	243	0.529	2.46	43346	7105	71100	60.8	1276	956	26.1
T1025	NA	NA	NA	TAMC	Healthy	T00d	Venous serum	220772	1.42462e+06	56.6	122883	98505	238720	2.02	290	0.333	1.78	37836	7721	66334	63.9	1325	1337	79.1
T1025	NA	NA	NA	TAMC	Healthy	T03d	Tasso SST serum	281967	1.33389e+06	61.2	118458	99856	235815	0.434	1266	0.111	1.91	37998	6995	80611	65.7	899	1131	104
T1025	NA	NA	NA	TAMC	Healthy	T03d	Venous plasma	290604	1.47109e+06	57.2	198315	80871	263761	0.0009	284	0.307	2.21	41727	6982	71085	62.8	1213	1171	35.1
T1025	NA	NA	NA	TAMC	Healthy	T03d	Venous serum	279149	1.34198e+06	51	112521	76016	246715	2.02	325	0.145	1.87	38719	6989	69305	61.4	1030	1150	56.6
T1025	NA	NA	NA	TAMC	Healthy	T07d	Tasso SST serum	273797	2.14255e+06	83.7	112705	105724	285846	3.92	940	0.087	1.17	42401	7138	74303	71.5	1083	1234	88.1
T1025	NA	NA	NA	TAMC	Healthy	T07d	Venous plasma	304210	1.99676e+06	62.3	196671	85341	263579	0.084	210	0.32	1.24	45254	6967	68643	68.1	1257	1130	30.8
T1025	NA	NA	NA	TAMC	Healthy	T07d	Venous serum	323140	2.2572e+06	70.2	124959	93658	291705	1.2	276	0.166	1.16	45751	6959	78153	70.2	1213	992	63.1
T1025	NA	NA	NA	TAMC	Healthy	T14d	Tasso SST serum	403767	5.67595e+06	445	210375	126252	321486	1.23	1669	0.28	3.82	48996	15953	74666	136	969	1821	98
T1025	NA	NA	NA	TAMC	Healthy	T14d	Venous plasma	347133	5.92524e+06	370	317692	84170	288143	0.0009	567	0.478	3.63	46125	13191	69409	132	1044	1583	32.3
T1025	NA	NA	NA	TAMC	Healthy	T14d	Venous serum	501711	7.39152e+06	311	283980	121750	386716	2.11	991	0.243	3.56	54411	17538	102643	131	1028	1566	56.4
T1025	NA	NA	NA	TAMC	Healthy	T28d	Tasso SST serum	1.03128e+06	10486662	1055	517114	166195	546163	6.84	2687	0.401	4.74	53115	17944	86437	175	867	1482	121
T1025	NA	NA	NA	TAMC	Healthy	T28d	Venous plasma	875412	9.68737e+06	883	770090	149204	512544	0.0009	1160	0.576	4.77	51778	17936	77143	170	936	1220	24.4
T1025	NA	NA	NA	TAMC	Healthy	T28d	Venous serum	1.05484e+06	1.02887e+07	907	519312	170630	509599	0.053	1249	0.383	4.39	53173	19568	83096	167	913	1372	63.6
T1026	Male	White	26	TAMC	Healthy	T00d	Tasso SST serum	265319	794822	161	72206	124496	313346	0.0009	1092	0.283	0.73	31864	4098	97212	80	1043	921	86
T1026	Male	White	26	TAMC	Healthy	T00d	Venous plasma	230230	559325	77.2	81282	101292	259388	0.081	158	0.312	0.737	29763	3560	75386	73.9	934	813	22.5
T1026	Male	White	26	TAMC	Healthy	T00d	Venous serum	244008	709120	153	33641	106742	285450	0.0009	210	0.249	0.718	29233	3771	92039	72.1	1001	829	94.6
T1026	Male	White	26	TAMC	Healthy	T03d	Tasso SST serum	265117	551454	151	49642	116244	286388	0.444	1575	0.325	0.691	27717	4169	90176	71.9	873	822	84.4
T1026	Male	White	26	TAMC	Healthy	T03d	Venous plasma	247440	594206	73.5	93719	86356	280716	0.0009	2131	0.449	0.911	29168	3852	82870	71.6	941	798	29.1
T1026	Male	White	26	TAMC	Healthy	T03d	Venous serum	229332	530215	167	45470	94681	270276	0.0009	322	0.254	0.957	30898	3924	107958	74.5	906	981	136
T1026	Male	White	26	TAMC	Healthy	T07d	Tasso SST serum	255262	430977	172	53781	129968	291654	0.279	2086	0.256	0.74	33050	4111	95285	74.3	991	962	64.1
T1026	Male	White	26	TAMC	Healthy	T07d	Venous plasma	230778	472136	88.7	142110	109280	262076	0.106	141	0.403	0.671	31303	4022	89288	71.2	1043	806	15
T1026	Male	White	26	TAMC	Healthy	T07d	Venous serum	256609	506744	147	48951	99862	282287	0.0009	151	0.309	0.592	29587	3854	91537	62.9	1030	839	36.2
T1026	Male	White	26	TAMC	Healthy	T14d	Tasso SST serum	248261	479654	147	431234	121452	295560	0.625	2748	0.066	0.599	33942	4191	96741	83.7	893	842	106
T1026	Male	White	26	TAMC	Healthy	T14d	Venous plasma	220457	555138	90.2	73638	84832	270315	0.066	190	0.246	0.843	31190	3677	78499	86.2	970	790	21.3
T1026	Male	White	26	TAMC	Healthy	T14d	Venous serum	227403	486781	102	33908	93556	269431	0.0009	340	0.082	0.521	31393	3779	111670	82.3	894	712	53.2
T1026	Male	White	26	TAMC	Healthy	T28d	Tasso SST serum	257692	1.77299e+06	151	212218	110595	292641	0.524	1401	0.148	0.84	30246	3906	127989	66.9	877	845	133
T1026	Male	White	26	TAMC	Healthy	T28d	Venous plasma	262572	1.58618e+06	88.7	138133	87022	287355	0.0009	169	0.249	0.99	30790	3855	102091	69.7	889	833	22.1
T1026	Male	White	26	TAMC	Healthy	T28d	Venous serum	276278	1.86252e+06	117	53279	91162	285416	0.0009	239	0.117	0.788	29379	3854	112428	63.6	964	814	56.9
T1027	Male	Other / Mixed	34	TAMC	Healthy	T00d	Tasso SST serum	343202	74248	70.6	137088	182581	213317	0.0009	839	0.205	0.998	45344	3831	53667	48.7	1407	992	110
T1027	Male	Other / Mixed	34	TAMC	Healthy	T00d	Venous plasma	355294	75192	54.7	187732	186142	232834	0.186	151	0.357	0.938	57317	4502	56448	45.2	1401	1016	13.1
T1027	Male	Other / Mixed	34	TAMC	Healthy	T00d	Venous serum	330734	74331	61.8	105499	188761	223924	0.0009	142	0.253	1.08	48172	4299	50533	44.2	1388	979	43.8
T1027	Male	Other / Mixed	34	TAMC	Healthy	T03d	Tasso SST serum	330265	74359	91.6	80151	225046	229510	0.0009	967	0.177	1.2	47483	3544	51926	42.5	1293	970	138
T1027	Male	Other / Mixed	34	TAMC	Healthy	T03d	Venous plasma	343949	91417	70.5	131203	201042	243401	0.027	124	0.364	1.05	57391	3832	53428	43.8	1510	933	11.8
T1027	Male	Other / Mixed	34	TAMC	Healthy	T03d	Venous serum	380258	98358	90.2	89240	211497	253339	0.0009	236	0.08	1.27	56337	4086	62451	42.7	1470	968	142
T1027	Male	Other / Mixed	34	TAMC	Healthy	T07d	Tasso SST serum	307483	64129	87.1	337731	189152	218708	0.0009	828	0.139	1.16	48701	3467	57651	38.9	1381	929	137
T1027	Male	Other / Mixed	34	TAMC	Healthy	T07d	Venous plasma	257479	89635	61.1	105419	173327	211974	0.0009	122	0.233	1.24	48300	3572	52171	37.2	1383	801	14.6
T1027	Male	Other / Mixed	34	TAMC	Healthy	T07d	Venous serum	279524	48063	70.6	54502	163240	194611	0.0009	106	0.102	1.2	46525	3466	48350	37.3	1292	902	57.3
T1027	Male	Other / Mixed	34	TAMC	Healthy	T14d	Tasso SST serum	283371	151531	61.7	307876	212181	215169	0.0009	967	0.201	1.46	50574	4100	45883	43	1276	1041	124
T1027	Male	Other / Mixed	34	TAMC	Healthy	T14d	Venous plasma	278456	112973	63.3	132622	185234	212315	0.02	121	0.345	1.47	54596	3745	43660	41.2	1224	813	15.9
T1027	Male	Other / Mixed	34	TAMC	Healthy	T14d	Venous serum	288626	143207	63.5	73784	187064	208776	0.0009	115	0.198	1.37	50624	3710	43699	37.4	1320	910	52.8
T1027	Male	Other / Mixed	34	TAMC	Healthy	T28d	Tasso SST serum	281249	110523	75.7	243516	227591	200963	0.0009	1809	0.234	0.88	53282	3720	51619	38.7	1150	916	138
T1027	Male	Other / Mixed	34	TAMC	Healthy	T28d	Venous plasma	254522	101848	48.8	133134	172411	205005	0.0009	135	0.393	0.79	47232	3602	50470	35.5	1164	891	38.8
T1027	Male	Other / Mixed	34	TAMC	Healthy	T28d	Venous serum	258545	89177	63.3	74391	188734	203711	0.0009	151	0.381	0.839	47415	3866	50720	37.8	1129	976	68.7
T1028	Male	White	53	TAMC	Healthy	T00d	Tasso SST serum	330078	369301	55.5	564918	367213	281441	0.0009	5776	0.772	1.27	47021	5061	111666	123	1132	999	86.5
T1028	Male	White	53	TAMC	Healthy	T00d	Venous plasma	261774	435031	37.2	254217	208325	247109	0.0009	172	2.6	0.99	42083	5185	54773	127	1485	701	25.4
T1028	Male	White	53	TAMC	Healthy	T00d	Venous serum	276546	332397	67.8	1.29554e+06	202937	276989	0.0009	194	2.01	0.865	41784	5471	61369	111	1485	827	65.9
T1028	Male	White	53	TAMC	Healthy	T03d	Tasso SST serum	252108	308445	50.5	1.19126e+07	235815	246724	1.37	2163	1.61	0.9	40293	5119	57659	86.9	1510	897	50.4
T1028	Male	White	53	TAMC	Healthy	T03d	Venous plasma	281041	332218	45.7	291879	195198	277413	0.105	132	2.07	0.763	47631	5045	62434	81.4	1665	680	23
T1028	Male	White	53	TAMC	Healthy	T03d	Venous serum	290985	373852	59.6	153615	198131	288063	1.9	165	1.77	0.826	43578	6215	71237	98.8	1552	877	41.7
T1028	Male	White	53	TAMC	Healthy	T07d	Tasso SST serum	265287	699152	47.6	163624	253968	257326	3.58	2211	1.06	2.47	35627	5562	60760	132	1019	983	44.1
T1028	Male	White	53	TAMC	Healthy	T07d	Venous plasma	213123	770084	38.5	288304	221565	226594	0.141	134	1.89	1.81	37781	5762	54368	118	1573	925	26.2
T1028	Male	White	53	TAMC	Healthy	T07d	Venous serum	272197	771430	59.2	140265	218923	254044	0.0009	156	1.45	1.76	39263	5418	65567	108	1519	845	56.1
T1028	Male	White	53	TAMC	Healthy	T14d	Tasso SST serum	242902	574984	79.6	174174	255423	248333	1.05	2901	1.43	1.26	40267	6160	61733	132	1679	1047	64.3
T1028	Male	White	53	TAMC	Healthy	T14d	Venous plasma	190629	498888	56.5	300411	201048	236690	0.105	143	2.18	0.9	40201	6205	54918	135	1932	833	26.8
T1028	Male	White	53	TAMC	Healthy	T14d	Venous serum	235735	522065	66.4	203746	210108	262524	1.56	165	2.01	1.2	39380	6261	60619	146	1876	954	30.3
T1028	Male	White	53	TAMC	Healthy	T28d	Tasso SST serum	205372	806671	92.3	639373	219216	236728	1.5	1348	1.25	1.3	37685	5086	58551	104	1591	827	41.8
T1028	Male	White	53	TAMC	Healthy	T28d	Venous plasma	184381	701726	47.1	250766	176491	204719	0.068	109	1.44	1.3	34502	4407	50875	99.4	1533	726	18.2
T1028	Male	White	53	TAMC	Healthy	T28d	Venous serum	186734	674726	66	128810	181186	242844	0.7	117	1.24	1.32	37797	5295	53298	102	1559	777	30
T1030	Female	White	48	TAMC	Healthy	T00d	Tasso SST serum	305750	790021	80.3	221742	99708	364346	0.00382404	3498	0.0225364	3.51	48840	4133	93444	39.4	1428.01	764	231.148
T1030	Female	White	48	TAMC	Healthy	T00d	Venous plasma	259342	686698	57.1	200564	52893	305578	0.0009	147	0.596	2.71	44397	3832	73516	31.8	2391	519	37.1
T1030	Female	White	48	TAMC	Healthy	T00d	Venous serum	282305	759553	74.1	79432	53239	339945	0.0009	160	0.416	2.86	44726	3768	77655	30.6	2323	808	269
T1030	Female	White	48	TAMC	Healthy	T03d	Tasso SST serum	266697	636994	83.6	153889	66854	289351	0.0009	1888	0.32	2.33	44570	3517	82114	35	2407	799	386
T1030	Female	White	48	TAMC	Healthy	T03d	Venous plasma	262138	729553	73.5	220889	50914	301330	0.0009	151	0.469	2.15	46786	3829	79785	29.4	2420	608	25.6
T1030	Female	White	48	TAMC	Healthy	T03d	Venous serum	278804	809966	81.3	94271	59307	330391	0.0009	277	0.411	2.21	46775	4616	96500	32	2635	651	243
T1030	Female	White	48	TAMC	Healthy	T07d	Tasso SST serum	296223	923376	129	275288	85698	288093	0.024	2859	0.602	2.21	45270	4867	87651	41.4	2405	883	420
T1030	Female	White	48	TAMC	Healthy	T07d	Venous plasma	295688	866793	94.7	259952	52100	348769	0.0009	150	0.581	2.07	52457	4384	86636	36	3104	698	50.8
T1030	Female	White	48	TAMC	Healthy	T07d	Venous serum	286649	1.00211e+06	108	115690	51237	309521	0.0009	174	0.298	2.15	44965	4395	76326	32.5	2199	710	343
T1030	Female	White	48	TAMC	Healthy	T14d	Tasso SST serum	275858	684804	99.6	152674	68306	304870	0.028	1109	0.46	3.63	43319	4266	101676	45.3	3587	973	282
T1030	Female	White	48	TAMC	Healthy	T14d	Venous plasma	226649	694776	94.7	227315	48447	266181	0.0009	145	0.613	3.28	41607	4044	88819	41.4	3837	820	46.3
T1030	Female	White	48	TAMC	Healthy	T14d	Venous serum	252433	811141	95.1	138666	54195	334238	0.006	175	0.586	3.43	44666	4406	98332	40.8	3159	873	215
T1030	Female	White	48	TAMC	Healthy	T28d	Tasso SST serum	314292	1.15803e+06	128	293921	68346	344761	0.0009	1836	0.529	2.48	50742	4623	103196	40.2	2670	909	407
T1030	Female	White	48	TAMC	Healthy	T28d	Venous plasma	262059	1063627	87	285280	40573	314098	0.0009	126	0.612	2.58	56489	4146	74782	38.4	3108	871	41.2
T1030	Female	White	48	TAMC	Healthy	T28d	Venous serum	280796	1.04213e+06	111	143060	43065	331911	0.0009	206	0.594	2.34	44005	4501	83676	35	2827	824	542
T1031	Female	Other / Mixed	50	TAMC	Healthy	T00d	Tasso SST serum	625050	4.42146e+06	120	300796	74544	375723	0.0009	1896	0.219	7.49	55184	5649	79846	37.8	683	1127	244
T1031	Female	Other / Mixed	50	TAMC	Healthy	T00d	Venous plasma	606703	4.47927e+06	75.1	617404	60056	392452	0.178	441	0.285	7.06	60317	5679	71323	36.1	815	897	41.3
T1031	Female	Other / Mixed	50	TAMC	Healthy	T00d	Venous serum	660522	4.27513e+06	103	318993	71755	416801	0.341	616	0.267	8.06	65347	5945	91444	36.2	804	1050	252
T1031	Female	Other / Mixed	50	TAMC	Healthy	T03d	Tasso SST serum	589346	5.94373e+06	160	451808	76185	376960	0.024	1908	0.176	6.9	55143	5349	89300	42.8	811	1153	301
T1031	Female	Other / Mixed	50	TAMC	Healthy	T03d	Venous plasma	500874	5.29739e+06	131	540413	51200	339038	0.198	425	0.192	7.2	48108	4665	74497	39.8	778	1054	33.4
T1031	Female	Other / Mixed	50	TAMC	Healthy	T03d	Venous serum	700622	6.32099e+06	129	442080	73400	439903	0.31	556	0.117	6.71	61279	6938	87665	40	811	1094	147
T1031	Female	Other / Mixed	50	TAMC	Healthy	T07d	Tasso SST serum	540740	7.43866e+06	117	331607	65436	397211	0.6	1464	0.255	5.29	54504	5597	75747	41.6	744	1107	176
T1031	Female	Other / Mixed	50	TAMC	Healthy	T07d	Venous plasma	477400	6.53636e+06	117	635967	59897	335465	0.0009	415	0.239	5.01	49758	5110	64379	37.5	794	979	50.6
T1031	Female	Other / Mixed	50	TAMC	Healthy	T07d	Venous serum	507280	7.97088e+06	150	313763	63686	360920	0.0009	484	0.287	5.08	55921	5667	82874	37.2	845	1074	426
T1031	Female	Other / Mixed	50	TAMC	Healthy	T14d	Tasso SST serum	751053	5.11835e+06	171	488167	80473	417168	0.437	3156	0.144	5.3	65977	5737	84699	37.2	1083	1418	405
T1031	Female	Other / Mixed	50	TAMC	Healthy	T14d	Venous plasma	576738	4.11367e+06	116	735691	56994	351488	0.0009	483	0.211	5.31	55450	5735	68104	36.1	1150	1133	29.1
T1031	Female	Other / Mixed	50	TAMC	Healthy	T14d	Venous serum	759362	5.32908e+06	123	429662	64792	398210	0.417	561	0.257	4.98	63207	6490	77992	36.8	1168	1213	99
T1031	Female	Other / Mixed	50	TAMC	Healthy	T28d	Tasso SST serum	514270	6.96119e+06	153	336735	79060	354140	0.252	1330	0.272	4.64	52572	5468	72363	39.4	794	1222	333
T1031	Female	Other / Mixed	50	TAMC	Healthy	T28d	Venous plasma	481837	6.69968e+06	107	582011	45125	321279	0.112	436	0.326	4.39	50037	4857	61364	36.3	813	962	45.1
T1031	Female	Other / Mixed	50	TAMC	Healthy	T28d	Venous serum	528674	6.99346e+06	145	298313	53805	369494	0.0009	489	0.222	4.49	57329	5800	77986	39.2	822	1189	395
T1032	Female	Other / Mixed	36	TAMC	Healthy	T00d	Tasso SST serum	485146	3.24259e+06	164	147701	40617	302739	0.0009	1992	0.0009	8.54	43774	5857	81672	56.7	771	797	371
T1032	Female	Other / Mixed	36	TAMC	Healthy	T00d	Venous plasma	487517	5.32287e+06	122	303039	22559	293850	0.0009	228	0.249	1.5	49469	5948	73559	50	731	663	127
T1032	Female	Other / Mixed	36	TAMC	Healthy	T00d	Venous serum	489295	3401067	109	149266	23679	294688	0.0009	222	0.063	1.49	44614	5494	75380	48.7	816	714	134
T1032	Female	Other / Mixed	36	TAMC	Healthy	T03d	Tasso SST serum	498016	3.19741e+06	191	125695	42899	267260	0.0009	1281	0.0009	2.28	41438	4954	73880	67.6	792	929.276	276
T1032	Female	Other / Mixed	36	TAMC	Healthy	T03d	Venous plasma	494358	3.45e+06	104	274655	27682	290844	0.09	330	0.221	1.32	44984	5294	70623	55	821	718	124
T1032	Female	Other / Mixed	36	TAMC	Healthy	T03d	Venous serum	460015	3.43356e+06	138	106710	28879	277591	3.64	422	0.182	1.25	40721	5252	91013	55.4	846	746	481
T1032	Female	Other / Mixed	36	TAMC	Healthy	T07d	Tasso SST serum	444477	4.84954e+06	154	26689	38209	294917	0.176	680	0.326	3.71	44278	5554	73875	70.5	688	965	115
T1032	Female	Other / Mixed	36	TAMC	Healthy	T07d	Venous plasma	427459	5.36039e+06	128	281263	31027	312809	0.184	241	0.333	2.96	48237	4812	72655	61.2	783	682	115
T1032	Female	Other / Mixed	36	TAMC	Healthy	T07d	Venous serum	422791	5.00995e+06	132	156854	34828	277299	0.115	401	0.17	2.87	44495	5454	78984	62.3	695	792	257
T1032	Female	Other / Mixed	36	TAMC	Healthy	T14d	Tasso SST serum	400604	2.02892e+06	156	90349	49025	257435	0.0477222	2846	0.00514339	3.64	42454	4051	67320	70.7	950.958	893	318.423
T1032	Female	Other / Mixed	36	TAMC	Healthy	T14d	Venous plasma	439455	2.24e+06	146	313378	25310	332078	0.0009	253	0.158	1.88	55230	5571	76346	65.9	920	861	136
T1032	Female	Other / Mixed	36	TAMC	Healthy	T14d	Venous serum	448402	2.45318e+06	150	127804	26572	294244	0.089	240	0.203	1.86	48896	5097	77994	60.4	842	822	208
T1032	Female	Other / Mixed	36	TAMC	Healthy	T28d	Tasso SST serum	532597	1.02842e+06	193	215132	49305	326657	0.0009	1844	0.0009	2.05	48601	5164	86353	82.1	660	956	294
T1032	Female	Other / Mixed	36	TAMC	Healthy	T28d	Venous plasma	525107	940201	149	297249	33661	325920	0.324	312	0.267	1.99	50735	5543	77053	81	831	940	144
T1032	Female	Other / Mixed	36	TAMC	Healthy	T28d	Venous serum	514247	910826	189	121857	32106	302815	0.228	346	0.177	1.98	51628	5444	83097	83.9	812	991	407
T1033	Female	White	62	TAMC	Healthy	T00d	Tasso SST serum	335675	2.1028e+06	224	402855	49661	211586	0.515	1662	0.283	1.35	30149	5408	55112	55.4	574	1039	95.4
T1033	Female	White	62	TAMC	Healthy	T00d	Venous plasma	345818	2.29308e+06	184	459390	22311	198861	0.416	349	0.45	1.35	33877	4894	51921	49.3	640	785	40.1
T1033	Female	White	62	TAMC	Healthy	T00d	Venous serum	346546	2.14815e+06	209	233174	24806	206070	0.529	435	0.279	1.4	33058	5077	55574	50.4	569	929	93
T1033	Female	White	62	TAMC	Healthy	T03d	Tasso SST serum	335051	2.14463e+06	155	264930	56832	217692	0.875	2259	0.185	1.47	31480	5111	58226	51.9	704	956	96.1
T1033	Female	White	62	TAMC	Healthy	T03d	Venous plasma	323436	2.0317e+06	126	499295	30773	230051	0.134	294	0.188	0.94	34946	5536	58850	50.6	883	858	35.1
T1033	Female	White	62	TAMC	Healthy	T03d	Venous serum	370933	2.21256e+06	166	190334	29805	231707	0.0009	389	1.89	1.23	33871	5036	62160	52.5	805	1067	144
T1033	Female	White	62	TAMC	Healthy	T07d	Tasso SST serum	334701	1.46874e+06	154	253572	37486	246608	0.056	1503	0.161	1.78	30190	5492	63588	58.7	754	1065	110
T1033	Female	White	62	TAMC	Healthy	T07d	Venous plasma	308526	1.5379e+06	109	580692	21274	230889	0.289	380	0.297	1.72	32958	5281	61682	55.4	910	902	27.5
T1033	Female	White	62	TAMC	Healthy	T07d	Venous serum	328747	1.45663e+06	127	265027	21238	235623	0.078	290	0.175	1.69	27465	5727	56245	55.7	903	1002	50.3
T1033	Female	White	62	TAMC	Healthy	T14d	Tasso SST serum	325982	1.57968e+06	180	298252	33316	201152	0.246	1123	0.06	2.81	32058	4790	53833	63.6	544	1082	74.3
T1033	Female	White	62	TAMC	Healthy	T14d	Venous plasma	255698	1.71939e+06	116	674575	21730	229650	0.066	287	0.247	1.95	36860	5366	55861	56.1	679	996	28.5
T1033	Female	White	62	TAMC	Healthy	T14d	Venous serum	313891	1.55673e+06	139	359874	22022	225661	0.539	376	0.218	1.97	35298	5432	59653	57	633	956	80.9
T1033	Female	White	62	TAMC	Healthy	T28d	Tasso SST serum	302956	1.77342e+06	169	242557	58413	213460	0.841	3644	0.133	1.93	32180	5046	64096	64.3	639	1213	125
T1033	Female	White	62	TAMC	Healthy	T28d	Venous plasma	257947	1.69428e+06	102	497332	23010	238708	0.0009	268	0.223	1.35	37240	5966	62122	54.5	665	861	30.7
T1033	Female	White	62	TAMC	Healthy	T28d	Venous serum	212917	1.59107e+06	128	243049	24213	209376	0.955	284	0.094	1.58	32764	5710	58655	63.1	596	1105	53.9
T1034	Female	Asian	39	TAMC	Healthy	T00d	Tasso SST serum	590076	1.7033e+06	314	723733	85334	399173	0.0009	2481	0.0009	3.17	57449	7164	171646	47.9	555	1022	189
T1034	Female	Asian	39	TAMC	Healthy	T00d	Venous plasma	569666	1.46321e+06	365	1.27321e+06	67831	364653	0.0009	445	0.833	3.07	59669	7581	119378	42.8	1481	871	74.4
T1034	Female	Asian	39	TAMC	Healthy	T00d	Venous serum	559670	1.32867e+06	369	727478	63826	347837	0.0009	480	0.111	2.8	52899	6242	129476	37.8	645	772	106
T1034	Female	Asian	39	TAMC	Healthy	T03d	Tasso SST serum	555830	1.1498e+06	264	305637	81580	314066	0.0009	5139	0.0009	2.01	51496	7095	143358	40.2	222	928	92.7
T1034	Female	Asian	39	TAMC	Healthy	T03d	Venous plasma	602092	1.10691e+06	171	588971	51051	334814	0.0009	382	0.519	1.41	61015	8317	99864	34.4	587	697	31.3
T1034	Female	Asian	39	TAMC	Healthy	T03d	Venous serum	607972	1.2773e+06	187	333386	58050	368542	0.0009	467	0.314	1.75	57278	10754	114533	37	613	889	85.9
T1034	Female	Asian	39	TAMC	Healthy	T07d	Tasso SST serum	554242	1.51167e+06	312	370966	112434	357458	0.0009	1454	0.237	3.12	56164	8911	121885	45.7	728	1082	192
T1034	Female	Asian	39	TAMC	Healthy	T07d	Venous plasma	506492	1.63216e+06	218	481508	63601	384258	0.0009	313	0.272	2.51	58483	6878	113044	35.7	853	676	17.6
T1034	Female	Asian	39	TAMC	Healthy	T07d	Venous serum	487622	1.51798e+06	231	295246	64779	333513	0.0009	404	0.086	2.35	51552	8062	113165	35.4	754	964	126
T1034	Female	Asian	39	TAMC	Healthy	T14d	Tasso SST serum	585847	965525	312	133979	71684	377710	0.0009	3936	0.0009	2.41	53390	7345	131253	44.8	1053	948	167
T1034	Female	Asian	39	TAMC	Healthy	T14d	Venous plasma	564822	978675	206	216161	36948	373595	0.0009	358	0.366	1.88	54138	7829	119679	32.6	1186	880	22.6
T1034	Female	Asian	39	TAMC	Healthy	T14d	Venous serum	540522	1.01883e+06	260	123001	40004	355600	0.0009	398	0.331	2.19	53890	7308	120320	34.6	1010	888	79.6
T1034	Female	Asian	39	TAMC	Healthy	T28d	Tasso SST serum	544274	1.81263e+06	292	124719	57710	395928	0.0009	1310	0.185	5.26	56928	7431	141193	44.5	917	909	180
T1034	Female	Asian	39	TAMC	Healthy	T28d	Venous plasma	589175	2030976	174	230117	44921	406910	0.0009	412	0.45	1.81	60978	8516	138415	35.2	891	773	27
T1034	Female	Asian	39	TAMC	Healthy	T28d	Venous serum	579049	1.85353e+06	230	125616	42374	373537	0.0009	391	0.215	1.88	55697	7774	131954	38	959	961	149
T1035	Female	Asian	51	TAMC	Healthy	T00d	Tasso SST serum	554525	4.68695e+06	171	446274	44239	352008	0.07	1558	0.344	2.49	35923	4925	88222	61.1	1460	1105	333
T1035	Female	Asian	51	TAMC	Healthy	T00d	Venous plasma	492897	4.44865e+06	139	577257	33470	315900	0.0009	338	0.062	3.91	37355	5358	77309	71.8	877	833	42.2
T1035	Female	Asian	51	TAMC	Healthy	T00d	Venous serum	544420	4.71127e+06	146	326702	32168	328072	0.421	358	0.037	3.62	37340	4868	81420	74.2	1004	953	255
T1035	Female	Asian	51	TAMC	Healthy	T03d	Tasso SST serum	546526	3.95294e+06	168	321561	34474	305298	0.0009	1071	0.305	3.25	34167	4962	76839	73.6	1525	1095	396
T1035	Female	Asian	51	TAMC	Healthy	T03d	Venous plasma	518788	4.41723e+06	123	633232	21636	294821	0.0009	234	0.401	3.04	33597	4756	67665	66.7	1316	768	59.6
T1035	Female	Asian	51	TAMC	Healthy	T03d	Venous serum	516657	4.42799e+06	151	353167	29905	315989	1.2	286	0.338	3.5	34610	5536	74845	66.8	1630	977	219
T1035	Female	Asian	51	TAMC	Healthy	T07d	Tasso SST serum	645050	4.76372e+06	175	331607	39353	303144	0.353	1067	0.168	3.8	33509	5355	77646	70.7	1363	1225	392
T1035	Female	Asian	51	TAMC	Healthy	T07d	Venous serum	637567	4.78303e+06	125	297308	25396	289503	0.0009	444	0.169	3.77	33806	4962	79567	57.9	1469	1146	232
T1035	Female	Asian	51	TAMC	Healthy	T14d	Tasso SST serum	1.20009e+06	1.2585e+07	208	549461	95154	678102	3.94	1995	0.216	4.11	69710	8429	146986	76.2	1256	1171	409
T1035	Female	Asian	51	TAMC	Healthy	T14d	Venous serum	685563	7.45565e+06	146	409886	43555	408956	0.124	1405	0.191	3.56	39894	5708	92186	75.8	1280	1148	195
T1035	Female	Asian	51	TAMC	Healthy	T28d	Tasso SST serum	597760	6104160	228	356062	39651	348329	2.98	1210	0.127	3.96	34290	5210	82066	45.5	1235	1327	439
T1035	Female	Asian	51	TAMC	Healthy	T28d	Venous plasma	609470	6.50964e+06	174	667984	26495	396193	0.0009	309	0.183	3.56	40439	5584	88707	79	1426	1045	77.2
T1035	Female	Asian	51	TAMC	Healthy	T28d	Venous serum	612668	6.83782e+06	175	348915	29099	364533	2.09	351	0.154	3.85	34268	5543	80558	75.4	1303	1273	307
T1036	Female	White	49	TAMC	Healthy	T00d	Tasso SST serum	497812	2.56662e+06	74.5	182413	85079	367786	0.092	1937	0.0009	3.1	53594	9301	102659	49.7	1010	1300	100
T1036	Female	White	49	TAMC	Healthy	T00d	Venous plasma	398978	2.17934e+06	51.8	292492	59859	330938	0.0009	310	0.002	2.83	51199	6224	76309	45.7	1036	1155	18.1
T1036	Female	White	49	TAMC	Healthy	T00d	Venous serum	423217	2.42046e+06	54.5	151884	64710	344572	0.273	366	0.0009	2.99	52442	6616	82966	46.9	1048	1162	34.4
T1036	Female	White	49	TAMC	Healthy	T03d	Tasso SST serum	449387	2.40853e+06	72.6	592263	96111	370201	0.0009	2094	0.0009	2.03	54871	6474	99598	46.7	929	1134	84.8
T1036	Female	White	49	TAMC	Healthy	T03d	Venous plasma	405031	2.16549e+06	54.3	299833	74026	373264	0.0009	319	0.0009	1.9	53869	6710	87997	39.8	1004	729	20.5
T1036	Female	White	49	TAMC	Healthy	T03d	Venous serum	454956	2.42535e+06	52.7	165125	73985	378134	0.769	309	0.0009	1.79	52546	7460	92042	46.6	944	1158	35.5
T1036	Female	White	49	TAMC	Healthy	T07d	Tasso SST serum	459985	1.64733e+06	72.3	3.89382e+06	152296	387974	0.0009	1706	0.0009	1.86	53746	7442	99651	48.3	874	1157	92.8
T1036	Female	White	49	TAMC	Healthy	T07d	Venous plasma	402897	1.68671e+06	55.4	292444	64449	365852	0.0009	291	0.072	1.79	52490	7000	91164	44.1	945	1013	29.8
T1036	Female	White	49	TAMC	Healthy	T07d	Venous serum	503227	1.98929e+06	69.1	355386	86175	427906	0.0009	418	0.0009	1.68	63207	7897	103653	42.7	947	920	88.1
T1036	Female	White	49	TAMC	Healthy	T14d	Tasso SST serum	552937	7.13893e+06	98.7	141804	102218	363906	0.0009	1744	0.0009	2.05	61695	7425	101564	68	929	1538	101
T1036	Female	White	49	TAMC	Healthy	T14d	Venous plasma	356244	6.79122e+06	66.8	269906	65468	369620	0.0009	424	0.0009	2.03	64567	7329	87406	65.2	909	1165	25.9
T1036	Female	White	49	TAMC	Healthy	T14d	Venous serum	409594	7.07276e+06	81	165511	66066	365506	0.5	461	0.049	1.85	60072	7208	88268	65	1163	1277	73
T1036	Female	White	49	TAMC	Healthy	T28d	Tasso SST serum	436077	2.77535e+06	68.3	632029	82897	368727	0.0009	1774	0.0009	2.39	54829	6497	107935	47	821	1287	106
T1036	Female	White	49	TAMC	Healthy	T28d	Venous plasma	344476	2.5277e+06	47.7	290510	63351	414573	0.0009	404	0.0009	1.97	57842	6625	78995	42.5	842	1003	28
T1036	Female	White	49	TAMC	Healthy	T28d	Venous serum	372677	2.78829e+06	53.5	147988	70312	375751	0.274	430	0.0009	2.12	58083	6903	80458	47	953	1139	74
T1037	Female	NA	56	TAMC	Healthy	T00d	Tasso SST serum	791954	12150259	239	396265	70553	379031	1.31	2075	0.215	6.52	32509	4253	76060	40	328	1050	576
T1037	Female	NA	56	TAMC	Healthy	T00d	Venous plasma	768873	1.09816e+07	205	759211	56194	363492	0.0009	383	0.225	6.99	33463	5040	73281	37.5	294	884	62
T1037	Female	NA	56	TAMC	Healthy	T00d	Venous serum	842575	1.05575e+07	201	448400	60437	381077	0.0009	454	0.078	7.87	32326	4627	76012	40.4	330	1017	217
T1037	Female	NA	56	TAMC	Healthy	T03d	Tasso SST serum	727776	1.03752e+07	222	487720	87063	374310	0.921	1745	0.2	5.96	28628	4389	74864	40.3	283	1080	672
T1037	Female	NA	56	TAMC	Healthy	T03d	Venous plasma	729069	1.04059e+07	209	661139	53141	424884	0.0009	362	0.177	7.23	32615	4377	74450	37.5	350	908	100
T1037	Female	NA	56	TAMC	Healthy	T03d	Venous serum	737856	11536089	235	368577	63799	451206	2.45	378	0.166	7.09	33390	4719	80853	38.2	341	982	693
T1037	Female	NA	56	TAMC	Healthy	T07d	Tasso SST serum	617545	5.99842e+06	238	870896	67320	391208	1.19	1676	0.735	5.02	30581	4485	75130	39.9	373	1096	525
T1037	Female	NA	56	TAMC	Healthy	T07d	Venous plasma	701447	6.37215e+06	215	1.87978e+06	53314	364063	0.0009	429	0.294	6.17	34457	4369	68103	35.7	354	1009	62.7
T1037	Female	NA	56	TAMC	Healthy	T07d	Venous serum	746714	6.4734e+06	197	748418	50833	398689	0.0009	431	0.011	6.35	29325	4272	76379	38.9	381	1059	105
T1037	Female	NA	56	TAMC	Healthy	T14d	Tasso SST serum	714702	6.65105e+06	218	1.50899e+06	112355	394253	4.83	2260	0.763	3.4	37591	4129	72399	40.1	242	1021	680
T1037	Female	NA	56	TAMC	Healthy	T14d	Venous plasma	656779	8.29202e+06	146	2.34105e+06	82958	427295	0.0009	373	0.026	3.58	40199	4021	74873	35.2	273	648	40.5
T1037	Female	NA	56	TAMC	Healthy	T14d	Venous serum	543182	5.80727e+06	174	910198	89940	427448	0.0009	372	0.0009	3.97	32064	4228	63131	38.3	271	808	312
T1037	Female	NA	56	TAMC	Healthy	T28d	Tasso SST serum	643408	8.07057e+06	288	613428	79983	392154	1.07	1558	0.014	7.46	34275	5231	80637	47.6	315	1229	427
T1037	Female	NA	56	TAMC	Healthy	T28d	Venous plasma	593688	8.55819e+06	179	1.11335e+06	65500	378087	0.0009	435	0.185	6.38	33455	4827	74013	35.6	310	971	49.9
T1038	Female	White	36	TAMC	Healthy	T00d	Tasso SST serum	779547	1.07068e+06	150	470482	15104	358121	0.0009	2817	0.089	2.08	62033	7431	68949	77.9	1214	1116	371
T1038	Female	White	36	TAMC	Healthy	T00d	Venous plasma	688409	776758	129	848568	9655	311110	0.0009	200	0.163	2	56712	7257	55498	75.7	1303	1039	57.3
T1038	Female	White	36	TAMC	Healthy	T00d	Venous serum	763542	973918	168	449761	10241	331694	0.0009	264	0.079	2.53	54704	7166	62853	80.7	1223	1294	318
T1038	Female	White	36	TAMC	Healthy	T03d	Tasso SST serum	837714	2.72136e+06	123	392670	17055	330597	0.0009	2389	0.074	1.62	59129	7093	63638	76	1625	1148	394
T1038	Female	White	36	TAMC	Healthy	T03d	Venous plasma	751214	2.41484e+06	103	565438	9705	316342	0.0009	201	0.125	1.48	58788	6171	51929	74.1	1459	1012	79.4
T1038	Female	White	36	TAMC	Healthy	T03d	Venous serum	848459	2.66265e+06	120	335235	10862	348820	0.0009	246	0.097	1.56	61871	6951	62763	70	1510	836	324
T1038	Female	White	36	TAMC	Healthy	T07d	Tasso SST serum	926889	7.11255e+06	575	278232	12625	382593	0.109	1447	0.752	3.59	69391	10275	75457	79.9	1086	1465	376
T1038	Female	White	36	TAMC	Healthy	T07d	Venous plasma	827033	7.55864e+06	520	452326	7663	399448	0.0009	457	0.676	4.1	69765	11218	67353	75.3	1101	1392	68.9
T1038	Female	White	36	TAMC	Healthy	T07d	Venous serum	966973	6.06312e+06	497	225507	7959	381390	0.0009	589	0.703	3.66	68403	10287	74599	69	901	1409	336
T1038	Female	White	36	TAMC	Healthy	T14d	Tasso SST serum	965363	1.59615e+06	264	121565	9278	388541	0.0009	1300	0.322	2.09	62940	8408	94767	86.4	1276	1260	357
T1038	Female	White	36	TAMC	Healthy	T14d	Venous plasma	941856	1623685	242	300839	5675	403205	0.0009	240	0.367	2.03	71731	9555	81293	82.1	1184	1155	67.5
T1038	Female	White	36	TAMC	Healthy	T14d	Venous serum	778821	1.27846e+06	266	106872	4711	337339	0.0009	251	0.349	1.98	53071	7502	67695	81.4	1317	1217	247
T1038	Female	White	36	TAMC	Healthy	T28d	Tasso SST serum	655108	668884	117	189998	8592	326874	0.0009	1609	0.012	1.09	55955	6222	61454	68.6	1380	1105	345
T1038	Female	White	36	TAMC	Healthy	T28d	Venous plasma	722259	773530	95.9	340555	4910	328499	0.0009	364	0.0009	1.08	60665	6390	58711	68.2	1477	1010	66.4
T1038	Female	White	36	TAMC	Healthy	T28d	Venous serum	745233	696591	95.3	187541	5664	361003	0.0009	290	0.0009	1.13	61292	7163	64141	64.5	1367	983	218
T1039	Male	White	22	TAMC	Healthy	T00d	Tasso SST serum	681060	323359	92.8	104169	28127	338538	0.0009	1116	0.21	1.26	48297	6379	68853	60.8	1668	1123	231
T1039	Male	White	22	TAMC	Healthy	T00d	Venous plasma	636519	284683	84.7	111006	18186	351983	0.0009	190	0.404	1.05	53375	6320	66574	58.4	1695	988	31.3
T1039	Male	White	22	TAMC	Healthy	T00d	Venous serum	701834	339479	83	66570	19431	364944	0.0009	217	0.253	1.11	50530	6462	71275	58.8	1778	1101	184
T1039	Male	White	22	TAMC	Healthy	T03d	Tasso SST serum	647053	1.2963e+07	528	164489	53723	359418	0.727	1594	0.194	1.87	49523	9241	74581	95.3	1370	1252	257
T1039	Male	White	22	TAMC	Healthy	T03d	Venous plasma	753089	1.4132e+07	442	235266	50187	430649	0.0009	613	0.392	1.74	61270	10054	83098	112	1632	1174	41
T1040	Male	White	27	TAMC	Healthy	T00d	Tasso SST serum	410724	739253	517	340097	157413	290677	0.0009	1195	0.0009	7.93	51845	7117	120242	65.6	1145	1401	196
T1040	Male	White	27	TAMC	Healthy	T00d	Venous plasma	369813	643237	418	120416	140321	252207	0.0009	300	0.013	7.68	50487	7516	99549	46.6	1233	1125	36.9
T1040	Male	White	27	TAMC	Healthy	T00d	Venous serum	340977	656435	429	69003	146628	278180	0.0009	336	0.0009	7.83	52654	6958	105156	50.1	1068	1245	131
T1040	Male	White	27	TAMC	Healthy	T03d	Tasso SST serum	415969	590935	171	238117	149185	272656	0.0009	772	0.0009	1.12	51630	6527	108180	63.1	1099	1139	203
T1040	Male	White	27	TAMC	Healthy	T03d	Venous plasma	420186	560790	110	102442	137731	316315	0.0009	152	0.098	1.03	56732	6674	110881	59.5	1341	979	30.9
T1040	Male	White	27	TAMC	Healthy	T03d	Venous serum	410708	642702	180	77315	136651	256075	0.0009	206	0.0009	1.1	48184	6380	107460	59.2	1302	1241	244
T1040	Male	White	27	TAMC	Healthy	T07d	Tasso SST serum	488573	301302	115	311470	148887	317611	0.0009	1660	0.0009	1.15	54054	6555	130817	46.4	1108	1162	212
T1040	Male	White	27	TAMC	Healthy	T07d	Venous plasma	396526	281887	58.3	79617	108895	276466	0.0009	144	0.0009	0.904	47705	5824	103654	39.4	1098	787	32.3
T1040	Male	White	27	TAMC	Healthy	T07d	Venous serum	423365	276363	101	48576	118716	299232	0.0009	146	0.0009	0.984	49865	6130	107141	40.3	1037	801	141
T1040	Male	White	27	TAMC	Healthy	T28d	Tasso SST serum	259744	314402	91.5	97453	165438	244237	0.0009	894	0.0009	0.704	53113	6164	93650	75.3	1198	1147	161
T1040	Male	White	27	TAMC	Healthy	T28d	Venous plasma	278725	394932	65.7	66822	134913	248747	0.0009	143	0.0009	0.712	54038	5989	86107	70.2	1283	639	34.2
T1040	Male	White	27	TAMC	Healthy	T28d	Venous serum	318013	418186	90.8	46842	142464	243467	0.0009	158	0.0009	0.535	51837	5834	88215	66.9	1218	1057	179
T1041	Female	Asian	37	TAMC	Healthy	T00d	Tasso SST serum	362893	5.17611e+07	120	154111	158836	300945	0.0009	2001	0.0009	2.33	64113	4053	123232	71.1	572	1055	91.5
T1041	Female	Asian	37	TAMC	Healthy	T00d	Venous plasma	333988	4.55533e+07	54.4	309703	74331	263027	0.0009	260	0.0009	2.06	61502	4263	94614	60.8	618	650	18
T1041	Female	Asian	37	TAMC	Healthy	T00d	Venous serum	324701	4.23834e+07	77.3	116973	78617	264204	0.0009	334	0.0009	2.15	56531	3775	103365	59.8	607	769	43.4
T1041	Female	Asian	37	TAMC	Healthy	T03d	Tasso SST serum	333668	5.56338e+06	111	141626	79765	268010	0.0009	1487	0.0009	1.42	61332	3880	142498	52.5	568	1024	68.4
T1041	Female	Asian	37	TAMC	Healthy	T03d	Venous plasma	286120	4.66922e+06	74.6	197729	53527	215711	0.0009	319	0.019	1.37	64170	3534	121449	43.5	762	845	19.8
T1041	Female	Asian	37	TAMC	Healthy	T03d	Venous serum	295859	5140304	105	129420	56756	247500	0.0009	368	0.0009	1.55	57872	4151	145247	44.8	680	912	60
T1041	Female	Asian	37	TAMC	Healthy	T07d	Tasso SST serum	316141	1.82486e+06	NA	88380	109969	224639	0.0150084	2898	0.0442861	1.27195	59701	3630	105512	83.0759	851.913	937.646	300.567
T1041	Female	Asian	37	TAMC	Healthy	T07d	Venous plasma	260065	1.95199e+06	80.5	126342	43525	241965	0.0009	353	0.0009	1.18	58218	4088	97200	41.1	680	773	18.9
T1041	Female	Asian	37	TAMC	Healthy	T07d	Venous serum	291621	1951040	92.8	68849	47330	228098	0.0009	354	0.0009	1.02	58791	3810	96167	38.5	685	807	39.1
T1041	Female	Asian	37	TAMC	Healthy	T14d	Tasso SST serum	263671	762474	NA	1.62823e+06	249898	181267	0.0129852	6105	0.0548702	1.47938	39430	3254	88170	53.0006	846.955	1032.07	154.737
T1041	Female	Asian	37	TAMC	Healthy	T14d	Venous plasma	280075	905523	58.4	149330	34996	224457	0.0009	359	0.0009	0.923	49992	4123	96359	46.8	684	645	29
T1041	Female	Asian	37	TAMC	Healthy	T14d	Venous serum	288740	863847	90.8	86904	33393	219341	0.0009	384	0.0009	1.01	48441	4031	97934	46.3	650	549	51.9
T1041	Female	Asian	37	TAMC	Healthy	T28d	Tasso SST serum	303157	882237	113	84500	64894	236259	0.0009	1789	0.0009	0.912	48660	4817	101201	55	741	902	59.4
T1041	Female	Asian	37	TAMC	Healthy	T28d	Venous plasma	280844	927410	73.1	170863	26376	229748	0.0009	332	0.065	1.06	50998	4809	89594	45.6	784	851	23.9
T1041	Female	Asian	37	TAMC	Healthy	T28d	Venous serum	306101	917283	85.8	87309	25109	208767	0.0009	345	0.0009	1.15	46448	4504	91446	45.3	824	885	35.3
T1042	Male	White	21	TAMC	Healthy	T00d	Tasso SST serum	449276	1.95221e+06	100	218951	93665	344853	0.0009	1323	0.0009	1.03	51535	6663	81727	121	738	1096	209
T1042	Male	White	21	TAMC	Healthy	T00d	Venous plasma	417228	2.10687e+06	75	211783	83771	332845	0.0009	170	0.002	1.02	52200	6640	72702	123	689	1079	35.4
T1042	Male	White	21	TAMC	Healthy	T00d	Venous serum	428127	2.05124e+06	82	110789	95285	338320	0.038	171	0.0009	1.22	53562	6985	73509	128	824	965	101
T1042	Male	White	21	TAMC	Healthy	T03d	Tasso SST serum	381495	1.06102e+06	122	701057	112070	317059	0.0009	2529	0.005	1.62	47965	6634	94013	112	828	1032	205
T1042	Male	White	21	TAMC	Healthy	T03d	Venous plasma	274941	856111	69.9	170652	76060	302588	0.0009	129	0.047	0.994	43055	5896	76305	113	846	908	37.7
T1042	Male	White	21	TAMC	Healthy	T03d	Venous serum	399603	1.22692e+06	90.4	90204	87007	326310	0.165	190	0.0009	1.02	49682	6689	90219	127	870	1067	164
T1042	Male	White	21	TAMC	Healthy	T07d	Tasso SST serum	408247	1.43731e+06	85.5	105039	99858	344961	0.0009	2200	0.0009	1.52	46232	6231	83197	169	746	1192	138
T1042	Male	White	21	TAMC	Healthy	T07d	Venous plasma	375071	1.40112e+06	48.2	191502	80574	322553	0.0009	157	0.0009	1.53	45955	6211	80019	170	768	1053	38.3
T1042	Male	White	21	TAMC	Healthy	T07d	Venous serum	389975	1.27479e+06	63.7	99657	87124	355177	0.0009	165	0.0009	1.55	46288	6367	75897	171	821	1043	90
T1042	Male	White	21	TAMC	Healthy	T14d	Tasso SST serum	369557	1.45862e+06	103	149858	100013	291696	0.0009	1571	0.0009	1.23	52652	7122	78136	148	781	1316	205
T1042	Male	White	21	TAMC	Healthy	T14d	Venous plasma	325802	1309665	66.5	179801	77679	277036	0.0009	162	0.052	1.18	47210	6941	69411	138	782	753	49.3
T1042	Male	White	21	TAMC	Healthy	T14d	Venous serum	357816	1.52649e+06	93.9	90790	79740	285894	0.0009	198	0.0009	1.18	48399	7177	74162	140	896	1143	210
T1042	Male	White	21	TAMC	Healthy	T28d	Tasso SST serum	371023	3.19369e+06	85.6	7.31667e+06	122174	314792	0.0009	850	0.0009	1.22	49029	6337	77520	139	628	1290	193
T1042	Male	White	21	TAMC	Healthy	T28d	Venous plasma	354914	3.49796e+06	51.2	196073	108898	306844	0.0009	135	0.0009	1.16	49146	6352	76226	135	727	1061	46.2
T1042	Male	White	21	TAMC	Healthy	T28d	Venous serum	346230	3.65341e+06	78.2	123515	118232	307874	0.0009	149	0.0009	1.29	51930	7049	75834	150	689	1248	201
T2000	Female	White	25	TAMC	Healthy	T00d	Tasso SST serum	448875	2.05811e+06	162	2.82629e+06	62087	272790	0.0009	814	0.0009	1.32	31641	3853	135460	52.2	1053	1069	158
T2000	Female	White	25	TAMC	Healthy	T03d	Tasso SST serum	381858	1901142	125	1.44656e+07	87419	281885	0.0009	792	0.0009	1.62	30036	3618	111645	48.5	1341	1113	160
T2000	Female	White	25	TAMC	Healthy	T07d	Tasso SST serum	377493	2.83037e+06	103	9.77456e+06	83575	266914	0.0009	673	0.0009	1.71	29190	3817	156281	49.9	1046	1145	214
T2000	Female	White	25	TAMC	Healthy	T14d	Tasso SST serum	343814	551876	122	786609	57362	254406	0.137	1481	0.347	0.96	28712	3983	95850	37.2	1377	932	129
T2000	Female	White	25	TAMC	Healthy	T28d	Tasso SST serum	413394	1.11439e+06	114	244838	61195	251529	0.0009	1628	0.037	2.16	29472	3909	114024	48.8	1100	1052	153
T2000	Female	White	25	TAMC	Healthy	T28d	Venous plasma	405428	1.23465e+06	70.9	308125	45280	263855	0.004	269	0.08	2.71	31514	3654	104505	54.1	1049	749	42.3
T2000	Female	White	25	TAMC	Healthy	T28d	Venous serum	432970	1.13853e+06	81.5	171043	46442	253907	0.0009	246	0.0009	2.26	28369	4146	107446	48.2	1019	892	75.8
N0002	Male	White	35	NHRC	COVID	T00d	Tasso SST serum	553684	4.61876e+06	54.2	8.06054e+06	598876	300683	0.361557	4009	0.212326	1.79	40325	5278	109061	55.4	875.862	1099	185.394
N0004	Male	White	37	NHRC	COVID	T00d	Tasso SST serum	698829	2.71175e+06	153	4.901e+06	211068	439230	22.8	5203	0.184	54.9	42125	5199	320285	78.6	1273	1403	573
N0005	Female	White	22	NHRC	COVID	T00d	Tasso SST serum	1.08187e+06	2.30303e+06	78.8	4.63088e+08	106722	408085	6758	28830	0.146	27380	38058	4607	921619	11.6	1828	1739	1796
N0007	Male	White	23	NHRC	COVID	T00d	Tasso SST serum	475439	1.1201e+06	103	5.90962e+07	34288	250789	0.77	1208	0.012	1.72	63749	5134	147420	49	1472	1138	228
N0008	Female	Asian	46	NHRC	COVID	T00d	Tasso SST serum	819071	4.4455e+06	143	662501	42606	315877	3.43	3640	0.248	22	42591	5443	171968	40.3	1120	1024	321
N0010	Male	White	30	NHRC	COVID	T00d	Tasso SST serum	445012	1.08385e+06	70.7	1.78413e+07	395240	366411	5.44	4024	0.312	11.1	50889	4824	377181	58.5	1060	1246	732
N0012	Female	Other / Mixed	20	NHRC	COVID	T00d	Tasso SST serum	462967	1.12381e+06	73.8	4.27513e+06	55628	318509	1.32	1190	0.085	2.62	43272	2589	91550	32.6	1463	1098	268
N0014	Female	White	28	NHRC	COVID	T00d	Tasso SST serum	681352	5.69511e+06	318	1.39314e+06	29711	327569	13.9016	6292	0.165256	35	36659	3998	320212	17.9	774.035	1099	393.013
N0016	Male	Asian	44	NHRC	COVID	T00d	Tasso SST serum	446764	2.25941e+07	204	1.42379e+06	449180	369127	2.6	1405	0.057	5.67	30994	3933	91299	172	600	1456	963
N0017	Female	Other / Mixed	26	NHRC	COVID	T00d	Tasso SST serum	501652	315691	74.7	4.63088e+08	55907	266052	1.67	3130	0.0009	13.5	42300	3076	202407	25.6	2226	1109	355
N0019	Male	White	26	NHRC	COVID	T00d	Tasso SST serum	536284	2.39544e+06	126	4.63088e+08	130053	283496	173	5053	0.233	3769	60278	3756	299378	32.5	762	1184	587
N0031	Male	White	71	NHRC	COVID	T00d	Tasso SST serum	486813	357721	NA	4.63088e+08	228933	244703	72.4084	9774	0.0400745	393.494	34440	3980	482098	23.3745	802.818	1374.71	684.067
N0033	Female	White	34	NHRC	COVID	T00d	Tasso SST serum	463848	1.52353e+06	152	8.03618e+06	63906	276359	13	3498	0.045	155	37127	3676	362182	25	357	1160	345
N0034	Male	White	36	NHRC	COVID	T00d	Tasso SST serum	954805	2.74668e+06	185	5.18603e+06	322169	490512	0.932	1402	0.124	1.83	65787	5080	146365	92.1	912	1348	514
N0035	Male	Black / African American	33	NHRC	COVID	T00d	Tasso SST serum	416327	1.72027e+06	44.7	4.63088e+08	125773	253522	21.5802	3517	0.0477282	101	21781	1627	140025	14.3	779.474	952	410.363
N0044	Female	Other / Mixed	32	NHRC	COVID	T00d	Tasso SST serum	750962	8.17607e+06	108	1.56955e+07	48037	320191	2.57552	2000	0.78057	1.07	28196	4069	246400	35.4	834.342	1158	149.195
N0045	Male	White	43	NHRC	COVID	T00d	Tasso SST serum	413416	653827	167	108813	184011	289611	0.0009	406	0.153	0.626	32349	5271	94910	87.9	984	850	54.6
N0046	Male	Asian	32	NHRC	COVID	T00d	Tasso SST serum	348885	3.4199e+06	543	238294	331016	300279	0.015	1231	0.445	6.55	50299	6822	71685	78.8	261	935	107
N0048	Male	White	15	NHRC	COVID	T00d	Tasso SST serum	305035	902871	452	4.63088e+08	42561	330680	1.33	1869	0.451	3.13	51854	6815	44508	31.7	1567	1062	235
N0051	Male	White	44	NHRC	COVID	T00d	Tasso SST serum	967227	2.59045e+06	298	1.65538e+06	13192	323697	0.278	950	0.215	1.15	26269	5583	86800	128	897	1435	268
N0053	Female	Asian	34	NHRC	COVID	T00d	Tasso SST serum	633686	3.28357e+06	471	4.63088e+08	338453	383158	1.04	4301	0.0009	1.49	39526	4386	194418	31	529	954	256
N0054	Male	White	45	NHRC	COVID	T00d	Tasso SST serum	1253226	5.63389e+07	359	5.73357e+06	324664	420426	1.32992	4076	0.499533	14.8	67588	7853	163477	170	974.398	1745	345.313
N0055	Female	White	44	NHRC	COVID	T00d	Tasso SST serum	869632	1.87453e+06	568	427458	126312	554733	0.0150084	1756	0.0207194	2.07	65978	9193	112342	46.3	926.314	1260	204.025
N0056	Male	White	20	NHRC	COVID	T00d	Tasso SST serum	563974	3.81984e+06	302	564889	127734	383138	0.01	1453	0.094	10.6	73034	7348	108217	66.4	867	1163	241
N0057	Female	White	17	NHRC	COVID	T00d	Tasso SST serum	525251	1.19976e+06	267	3.01874e+06	18961	289401	0.154	1518	0.135	1.28	50102	5068	85927	29.4	863	809	345
N0058	Female	Other / Mixed	28	NHRC	COVID	T00d	Tasso SST serum	250431	373891	86.9	1.37498e+07	37936	187482	62.1	1361	0.43	529	32115	2439	162648	93.2	314	946	284
N0059	Female	White	28	NHRC	COVID	T00d	Tasso SST serum	377169	8.74544e+06	139	1.25143e+07	76056	306048	0.057	1103	0.151	6.93	51325	4535	84341	31	1631	1176	613
N0060	Male	White	39	NHRC	COVID	T00d	Tasso SST serum	677974	1.56233e+08	178	1.53326e+06	877000	391914	1.69	2528	1.55	19.3	28771	4815	145021	67.5	922	1407	450
N0061	Female	Other / Mixed	28	NHRC	COVID	T00d	Tasso SST serum	493781	7.39918e+06	77.8	8.46627e+06	96180	333208	21.7	3823	7.62	1.43	37334	4976	223439	49	928	1318	318
N0062	Female	White	35	NHRC	COVID	T00d	Tasso SST serum	573090	2.08526e+06	125	2.51071e+06	20556	326368	13.2	1298	3.62	1.88	39222	2616	127570	24.4	945	1229	300
N1011	Female	White	28	NHRC	COVID	T00d	Tasso SST serum	1.2491e+06	5071299	182	3.42979e+06	136433	395302	1.68	2695	0.137	3.89	60973	5088	117025	76.4	948	969	324
N2006	Female	White	32	NHRC	COVID	T00d	Tasso SST serum	1.25961e+06	6045760	396	4.63088e+08	126296	489279	0.727	1481	0.375	2.37	49340	6887	77925	131	830	1580	58.6
T0001	Male	White	28	TAMC	COVID	T00d	Tasso SST serum	693168	426868	214	5.21712e+06	109950	357944	0.47	3927	0.098	0.741	47004	5713	156641	35.5	904	1247	304
T0002	Male	Asian	39	TAMC	COVID	T00d	Tasso SST serum	660407	2.58137e+07	308	4.63088e+08	879582	571199	3472	29684	1.07	22249	73603	4450	847159	29.4	614	1809	1330
T0003	Male	Asian	31	TAMC	COVID	T00d	Tasso SST serum	299245	1638504	477	6.82596e+06	839272	328125	1.95	1691	0.302	11.2	48657	4395	100625	38.9	823	1034	183
T0004	Male	White	28	TAMC	COVID	T00d	Tasso SST serum	449917	3.1428e+06	343	897878	346069	341481	84.9	4708	0.122	47.4	50106	4133	399500	24.2	750	1431	490
T0005	Male	Other / Mixed	44	TAMC	COVID	T00d	Tasso SST serum	342255	1.79136e+06	339	1.44607e+06	234213	326618	0.706	2078	0.114	2.07	33976	3548	82184	41.8	582	921	151
T0006	Male	Black / African American	20	TAMC	COVID	T00d	Tasso SST serum	468617	426110	127	1.98635e+07	140547	236920	0.207	1609	0.042	1	30945	4368	133480	32.1	783	974	236
T0007	Male	Native Hawaiian / Pacific Islander	25	TAMC	COVID	T00d	Tasso SST serum	351678	8.43618e+06	521	4.63088e+08	564166	255142	0.677	1507	0.432	2.56	32936	4536	97415	62.9	1400	911	171
T0008	Male	White	27	TAMC	COVID	T00d	Tasso SST serum	429918	630137	599	2.24586e+07	136613	227957	6.52	2772	0.264	49.1	33801	6740	188170	58.2	1151	1332	372
T0009	Male	Other / Mixed	41	TAMC	COVID	T00d	Tasso SST serum	598329	1.00605e+06	391	3.46755e+06	148219	322707	0.271	1348	0.238	1.09	47138	7326	75874	50	710	1172	99.7
T0010	Female	White	36	TAMC	COVID	T00d	Tasso SST serum	598249	5.05883e+06	694	1.00655e+07	75945	264280	0.032	2271	0.0009	7.24	33839	6690	69923	50.3	650	997	100
T0011	Female	Asian	45	TAMC	COVID	T00d	Tasso SST serum	416455	310917	384	4.63088e+08	254169	268822	1.16	2183	0.289	2.57	59120	4040	81896	23.3	703	735	94.1
T0012	Male	White	19	TAMC	COVID	T00d	Tasso SST serum	593195	419001	79.8	1.93399e+07	129669	415688	25.3	4547	0.0009	74.3	48890	5111	362508	38.7	746	1034	221
T0013	Male	Asian	34	TAMC	COVID	T00d	Tasso SST serum	532829	5.41464e+06	160	1.66751e+07	667211	361500	37.1	3877	0.262	584	39829	4669	296245	40.3	774	1139	559
T0014	Male	White	59	TAMC	COVID	T00d	Tasso SST serum	378379	7.20865e+06	561	4.63088e+08	667458	310675	8.04	4424	0.036	4.98	35258	8712	97868	54.4	540	1405	318
T0015	Male	Other / Mixed	27	TAMC	COVID	T00d	Tasso SST serum	1.31383e+06	1.90088e+06	155	642345	368475	429552	0.314	2360	0.539	1.09	53233	4815	114580	290	995	1100	54.6
T0018	Male	White	25	TAMC	COVID	T00d	Tasso SST serum	501454	427335	139	2.6345e+07	170505	254074	0.304	2408	0.131	1.32	39316	5324	250649	189	1613	1070	299
T0019	Male	Asian	47	TAMC	COVID	T00d	Tasso SST serum	268011	4.84012e+07	1470	1.29146e+07	385601	313407	1.99	5104	0.267	34.6	34063	7290	71760	69.3	710	1093	307
T0020	Female	White	26	TAMC	COVID	T00d	Tasso SST serum	333628	879512	116	6.64145e+06	209687	251745	0.011	1686	0.121	1.13	41588	4441	70001	37.9	1736	857	208
T0021	Female	White	34	TAMC	COVID	T00d	Tasso SST serum	961154	4.00804e+06	881	295874	26369	535411	0.322	2568	0.334	6.23	46411	3922	87019	44.8	521	1193	89.9
T0022	Male	White	38	TAMC	COVID	T00d	Tasso SST serum	540473	2.84587e+06	459	366288	125693	327387	10.6	1403	0.604	6.55	50029	4782	49090	68.3	658	978	303
T0023	Female	White	20	TAMC	COVID	T00d	Tasso SST serum	841696	901926	163	1179135	98281	301433	0.0009	3226	0.23	1.16	44477	4500	106526	38.3	1915	840	185
T0024	Male	Other / Mixed	24	TAMC	COVID	T00d	Tasso SST serum	733301	5031332	1047	6.92989e+07	391028	358463	99.4	5448	0.335	4114	41977	5459	247426	35.2	1554	1133	200
T0028	Male	Other / Mixed	29	TAMC	COVID	T00d	Tasso SST serum	658200	3.36209e+06	485	727420	189719	354952	1.75	3814	0.347	2.85	72971	4752	69898	32.1	989	948	71
T0029	Male	Other / Mixed	27	TAMC	COVID	T00d	Tasso SST serum	393886	3.99406e+06	816	3.94468e+06	127248	235608	3.68	6743	1.16	5.68	59271	5706	97407	84.2	841	1260	119
T1039	Male	White	22	TAMC	COVID	T00d	Tasso SST serum	665734	933681	157	940112	39469	378663	0.521	1224	0.229	1.13	51109	5534	73780	52.4	1893	1143	295
